# Supplementary material
Source: PubMed Central journal article supplement (PMC7239344)

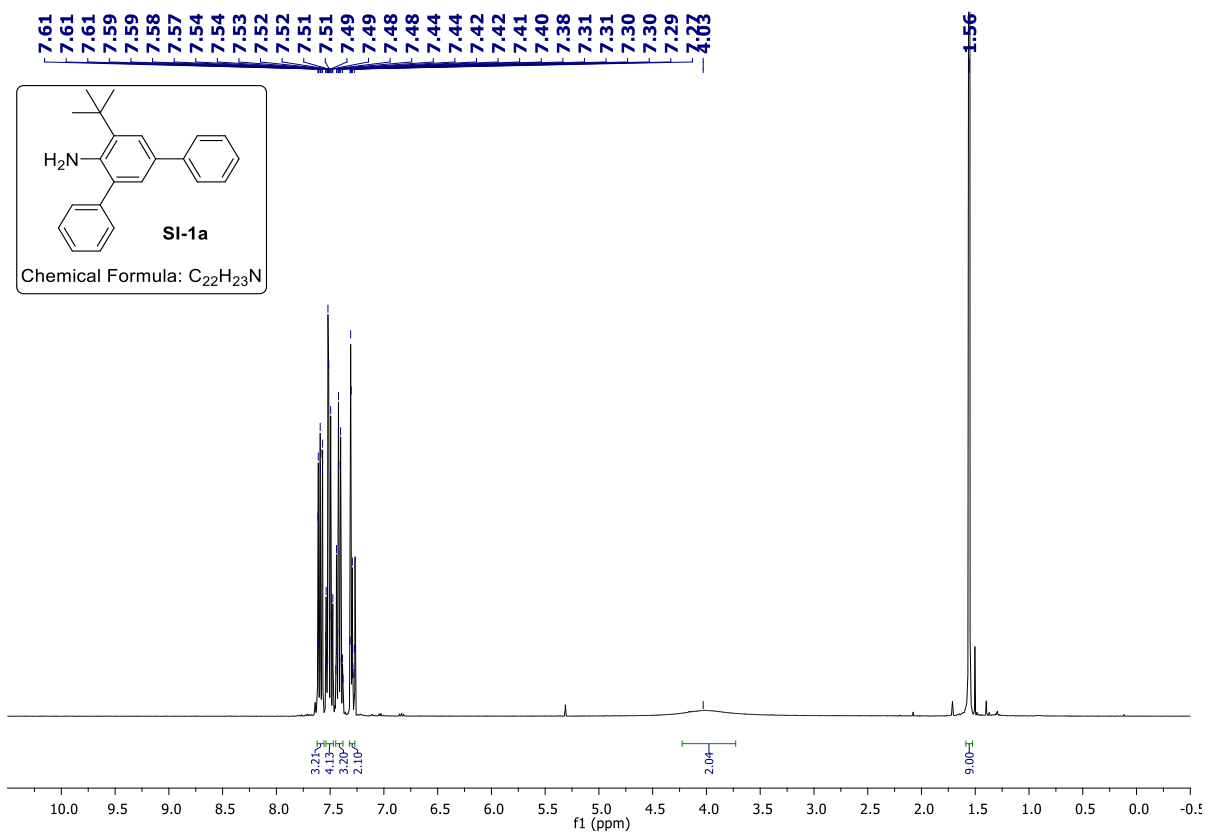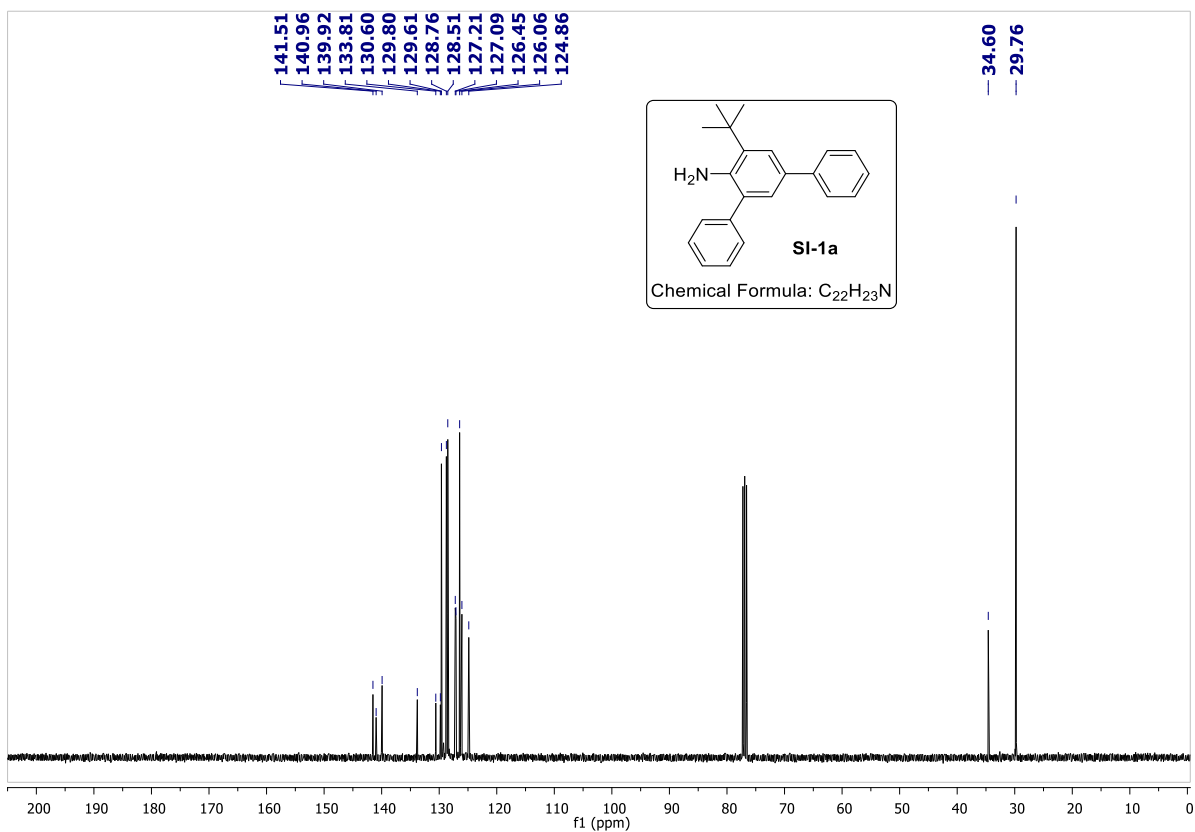

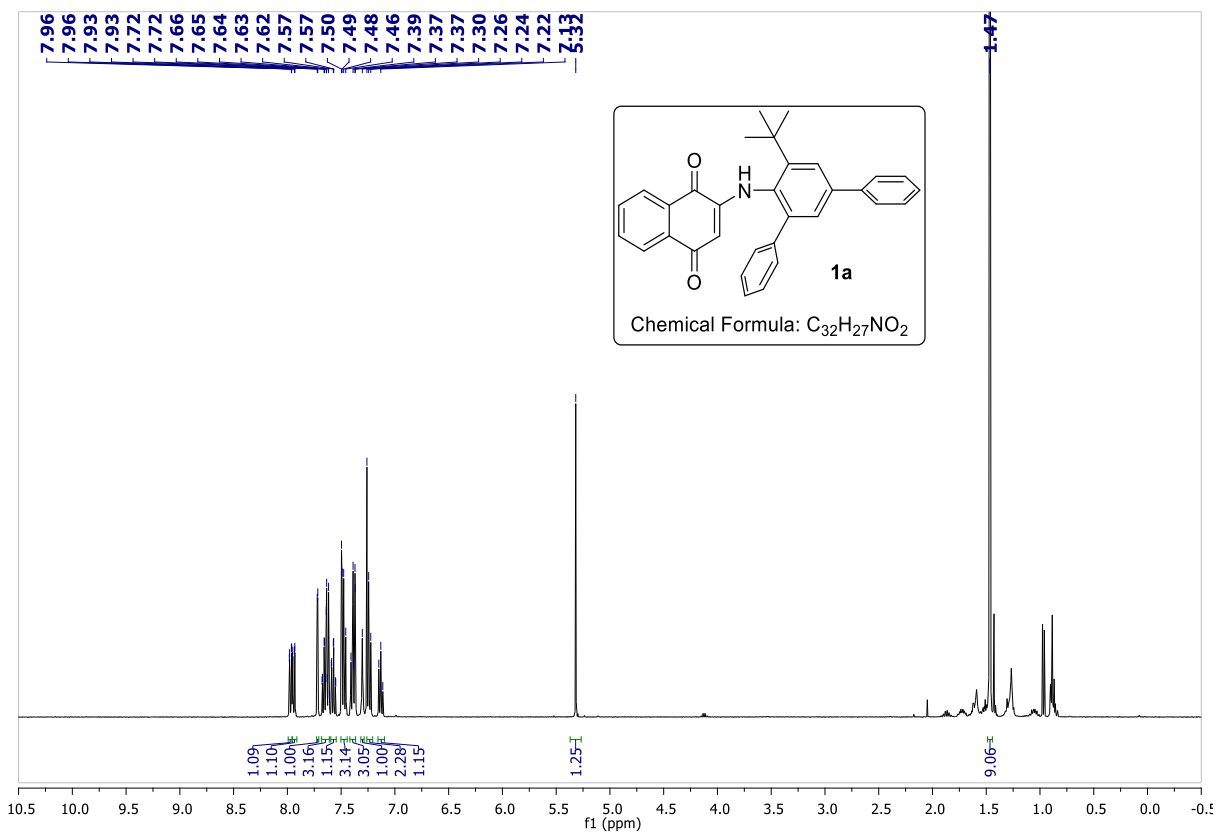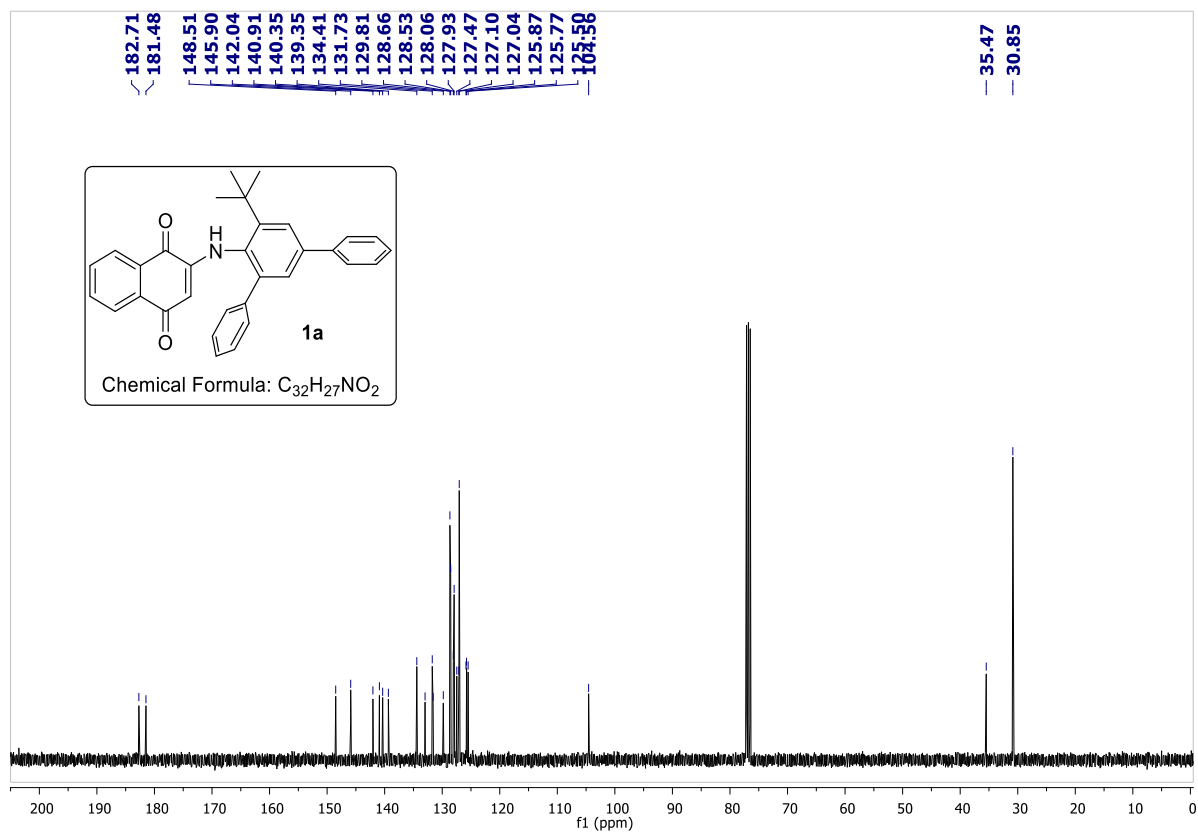

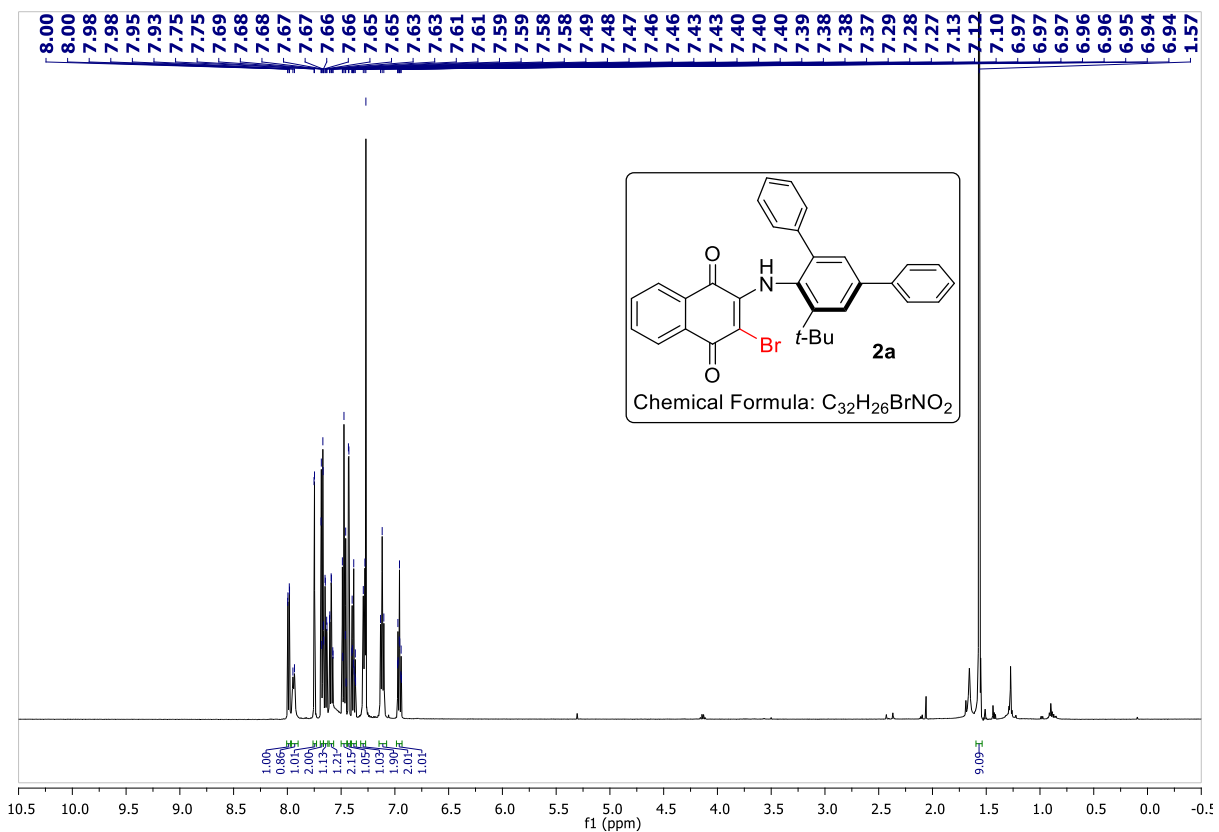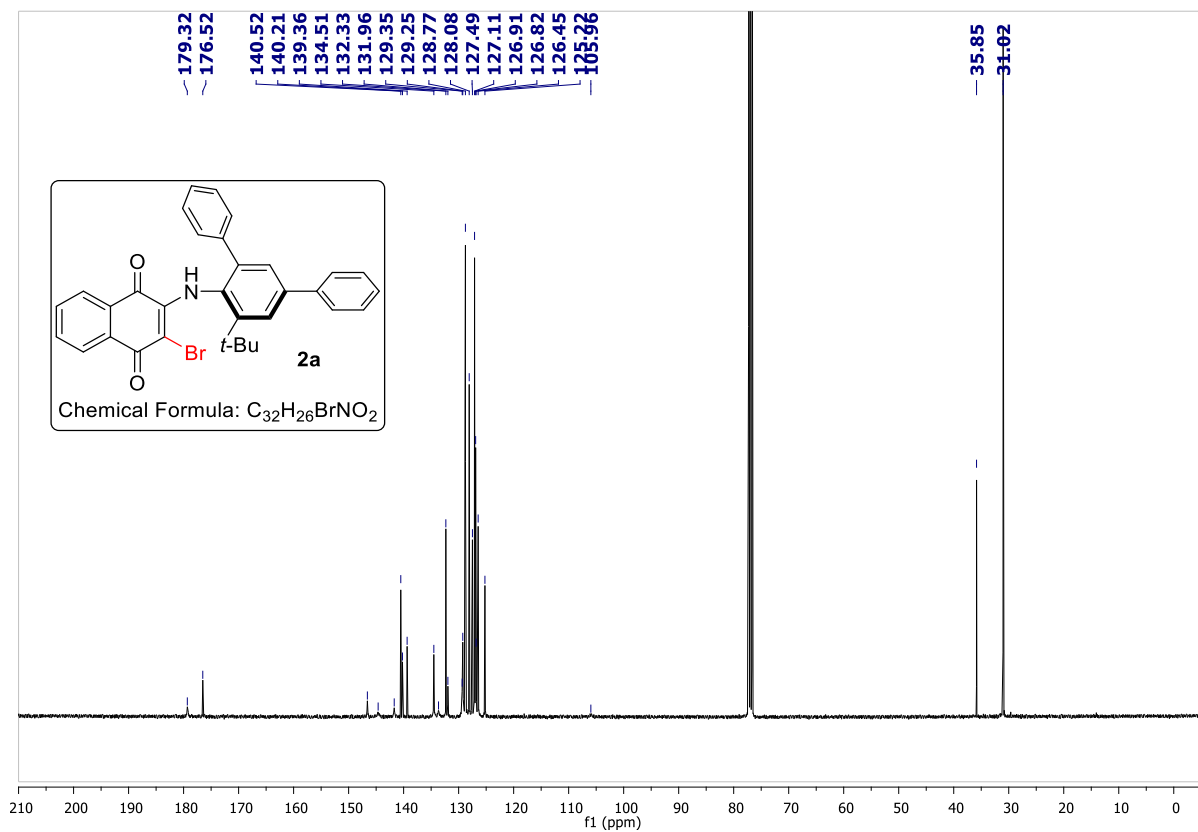

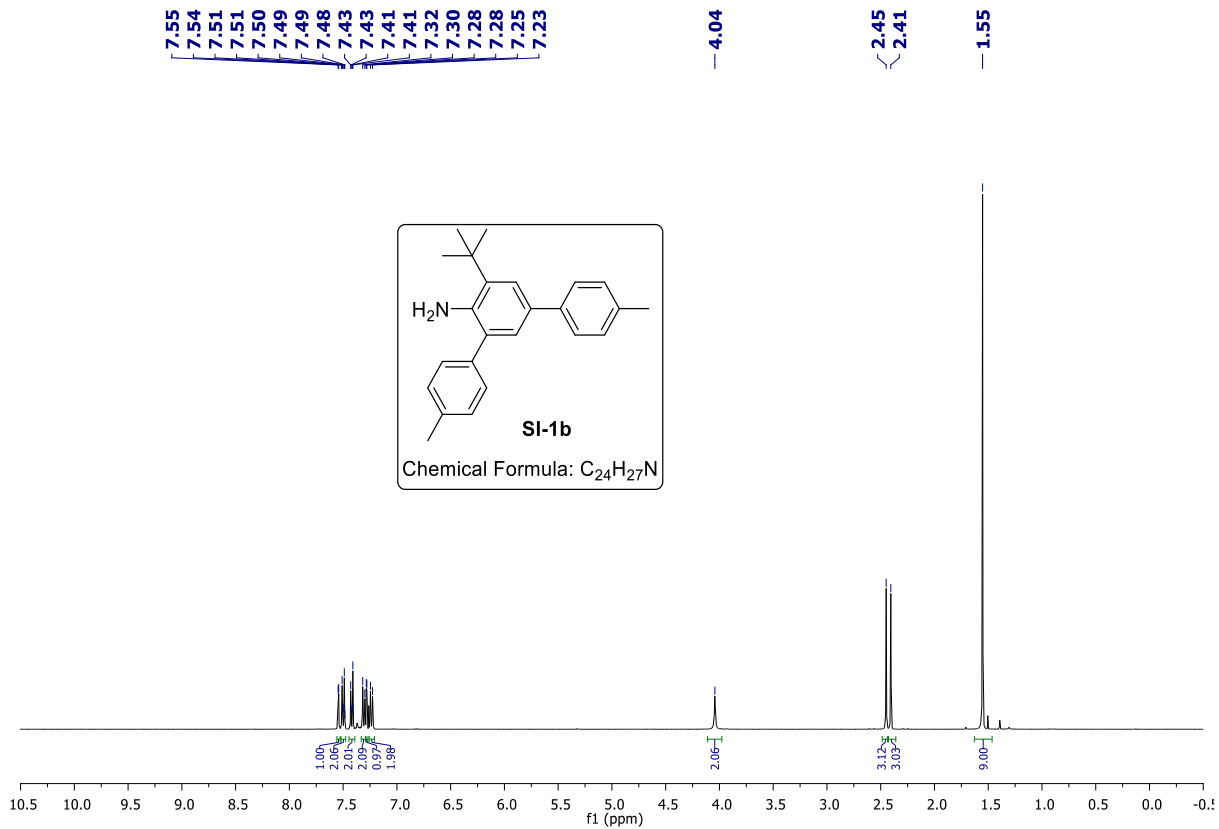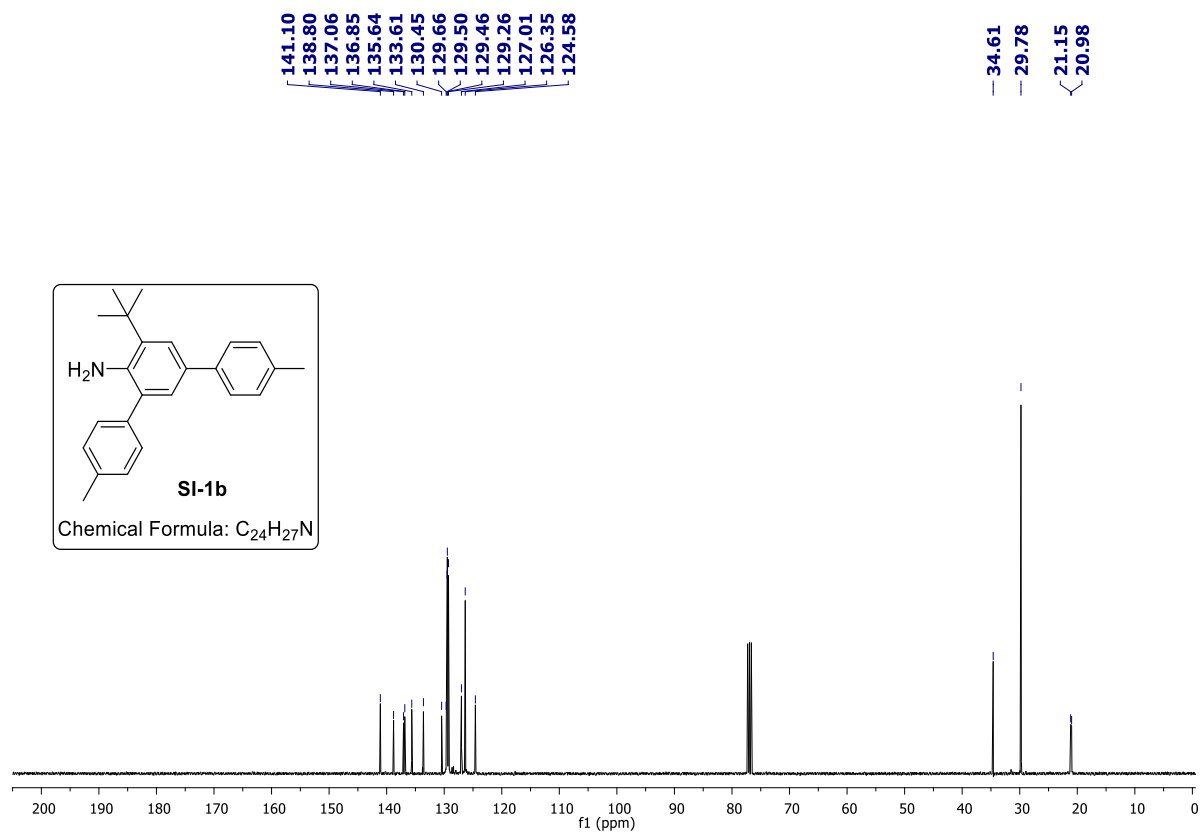



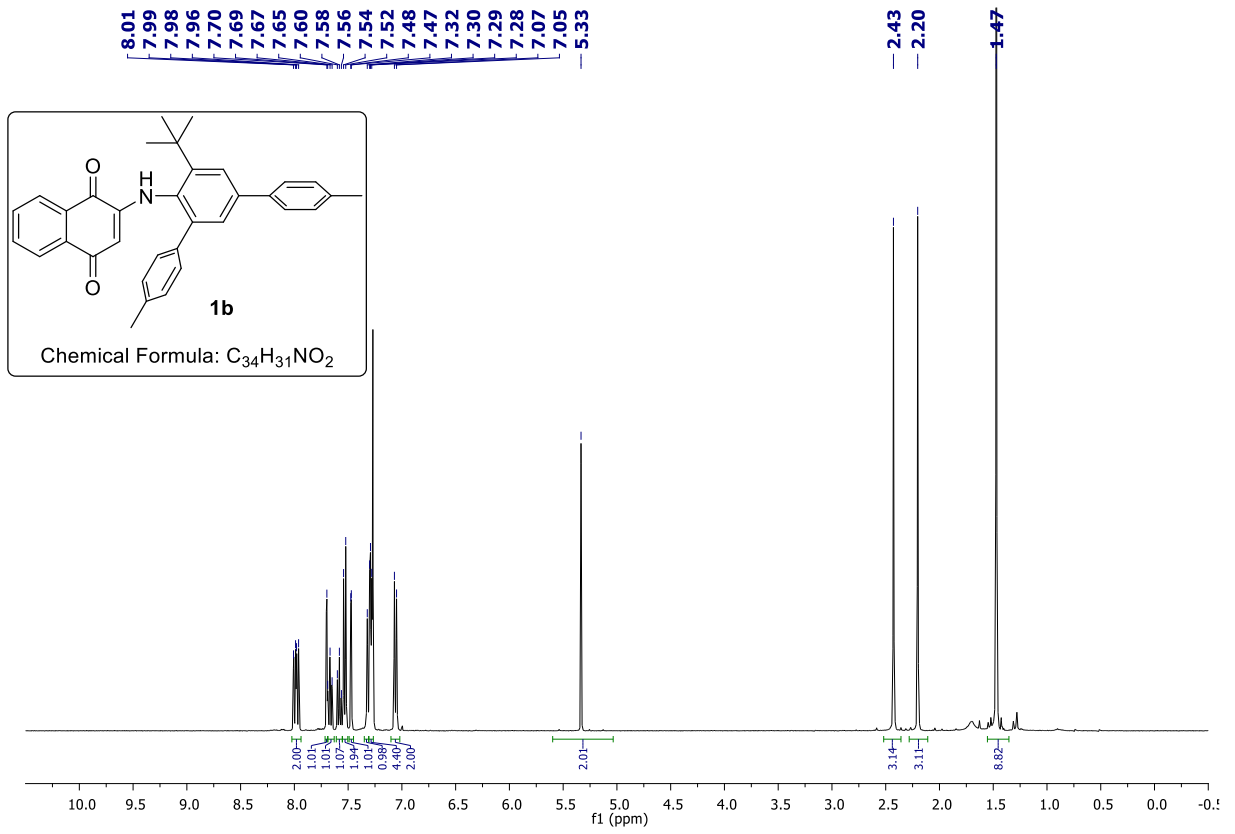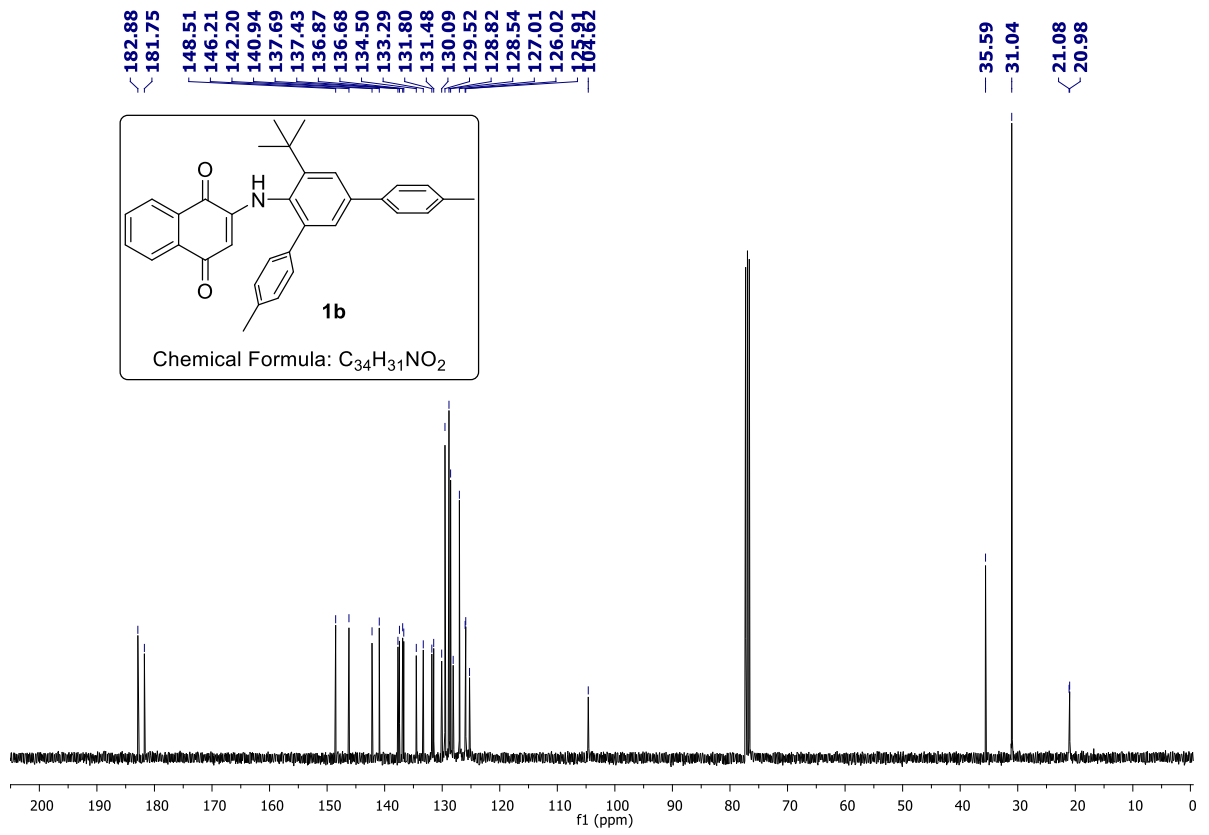

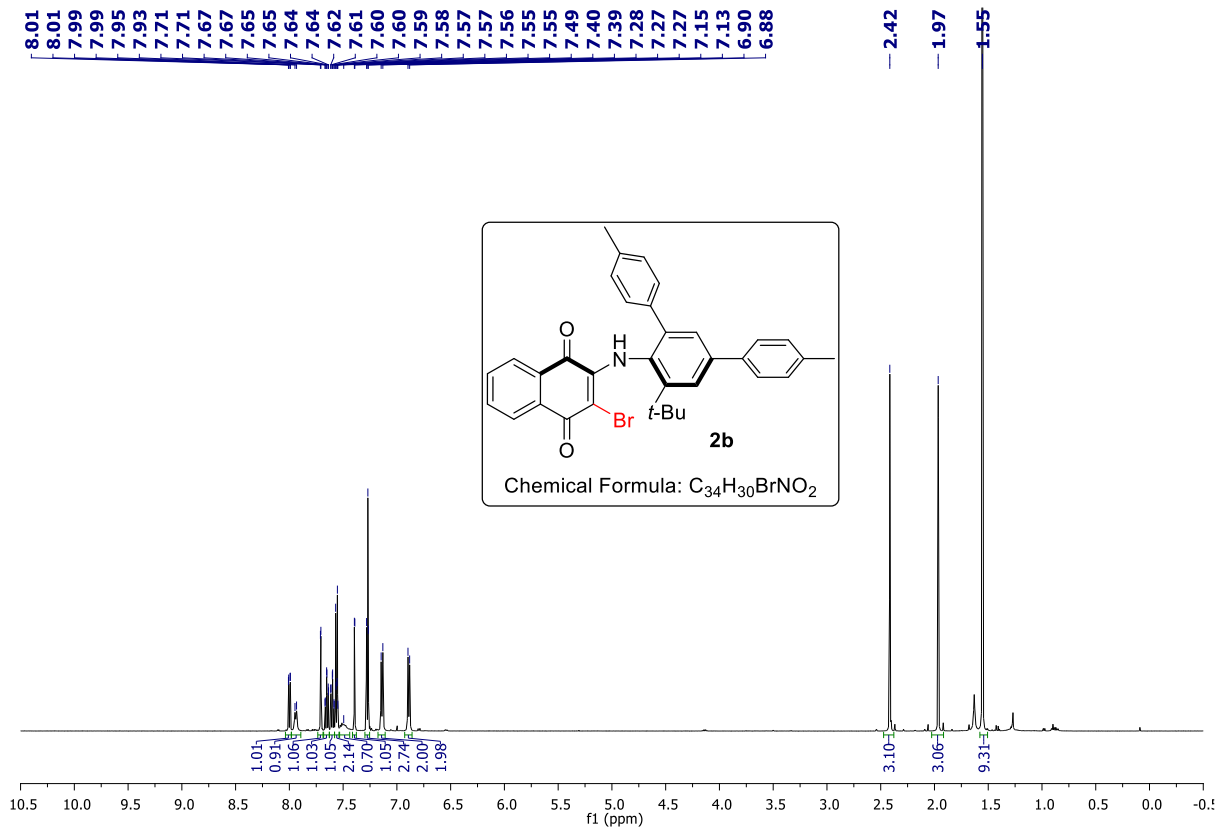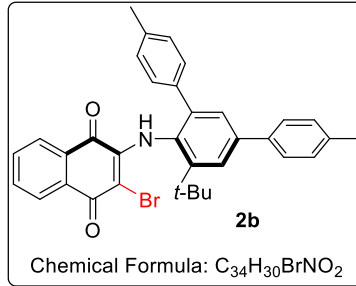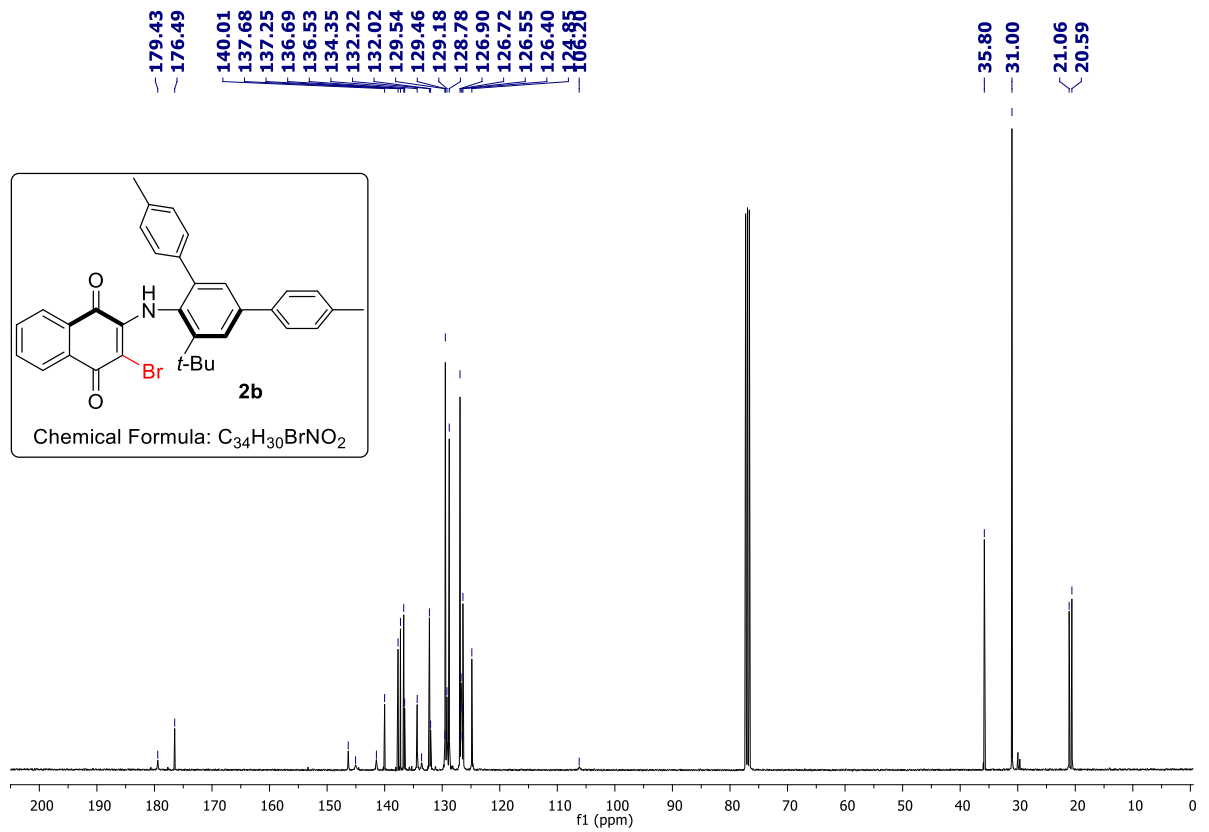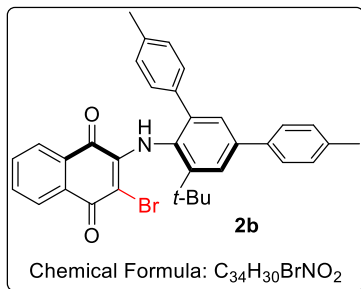

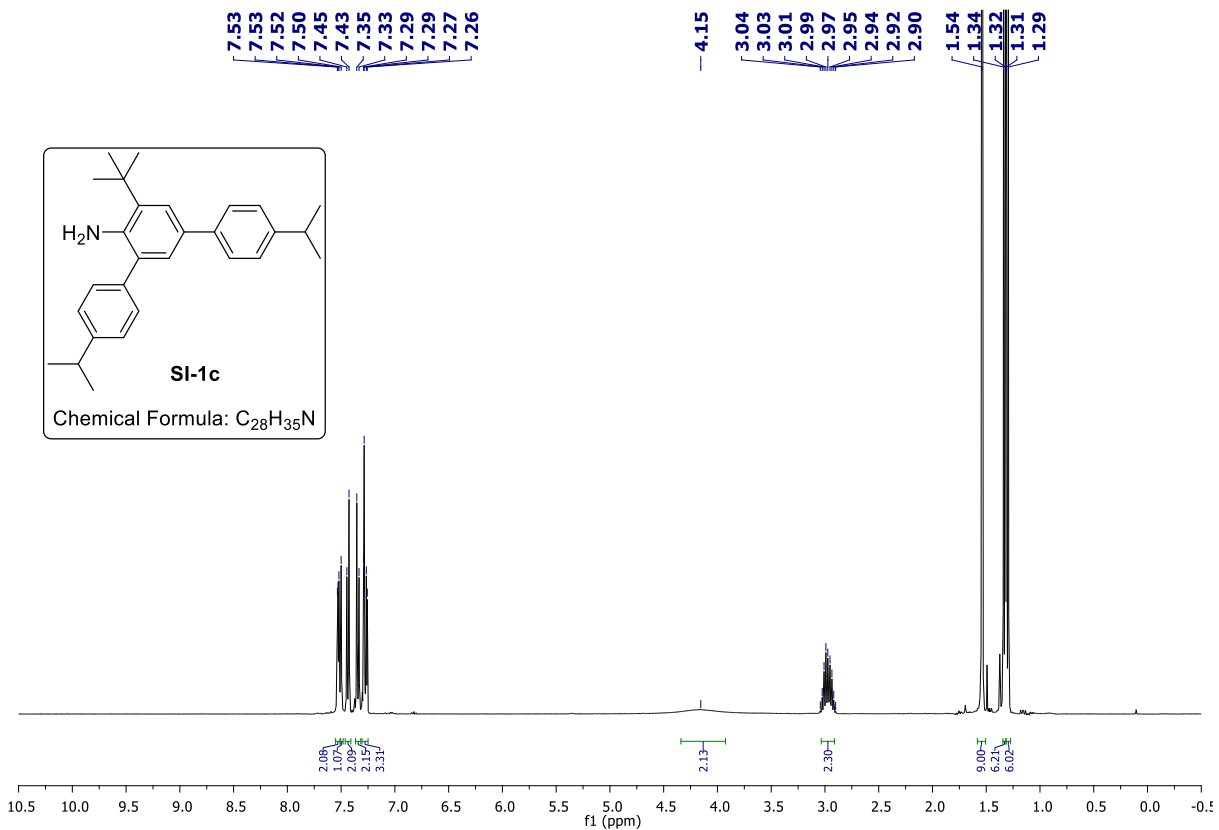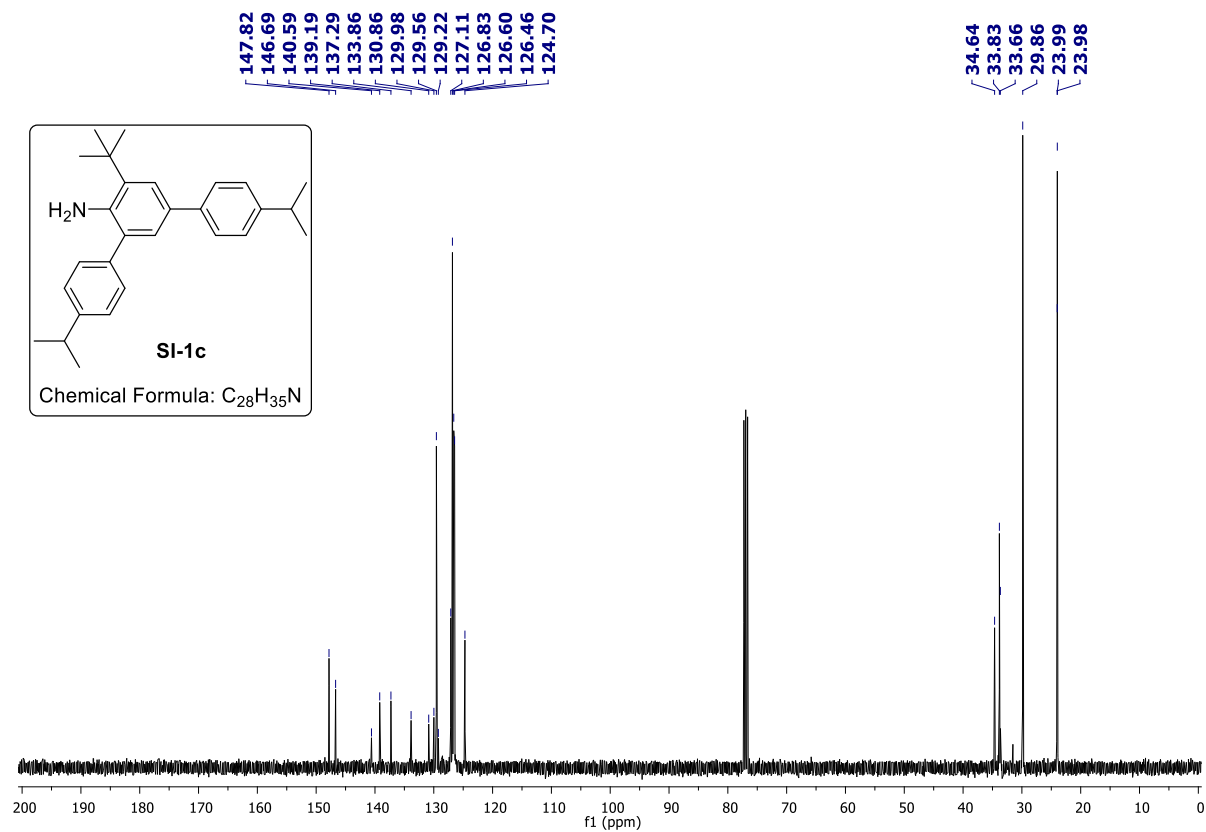

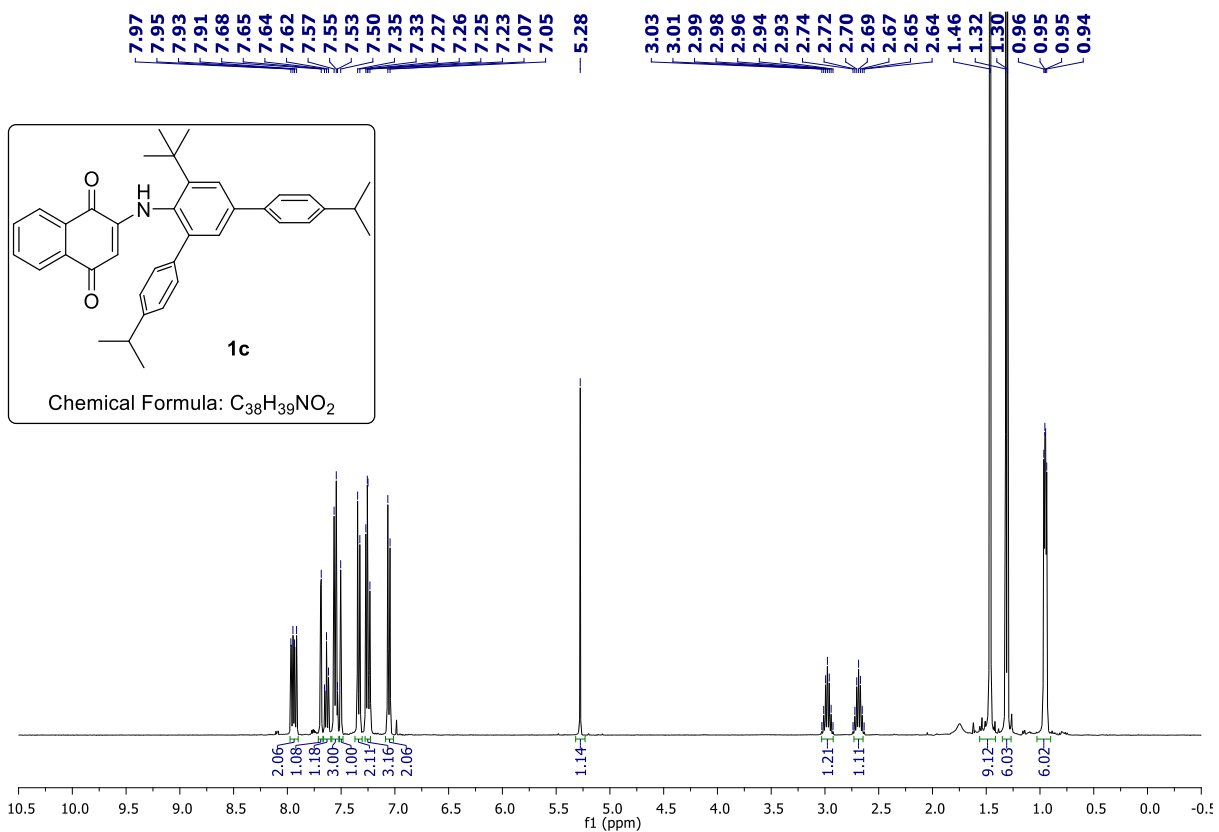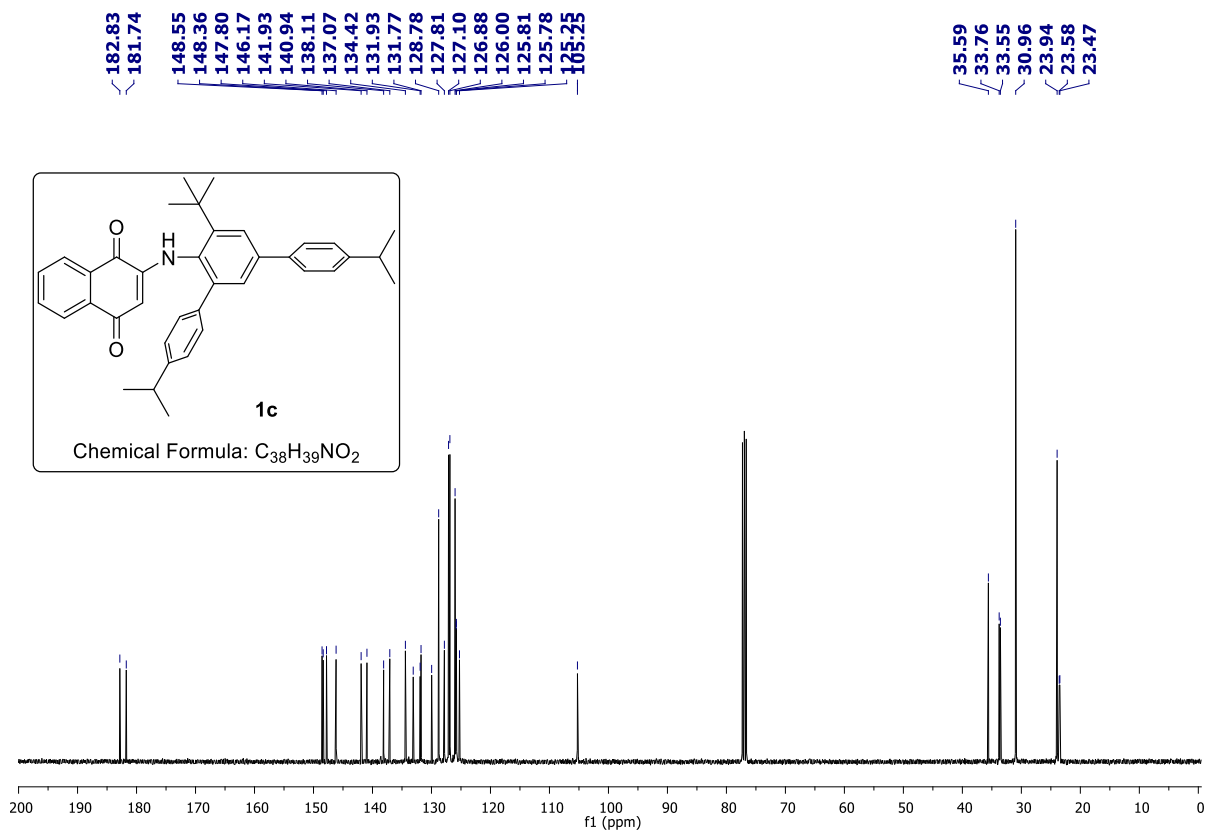

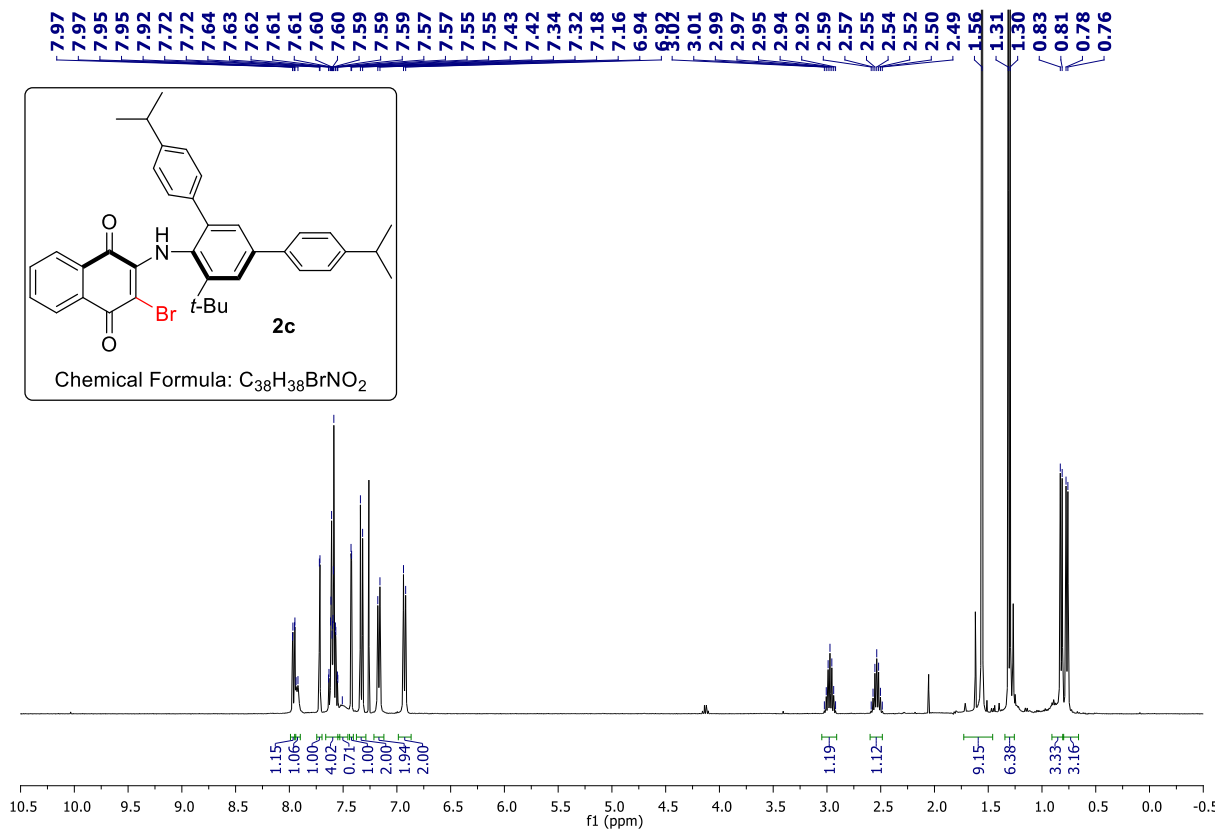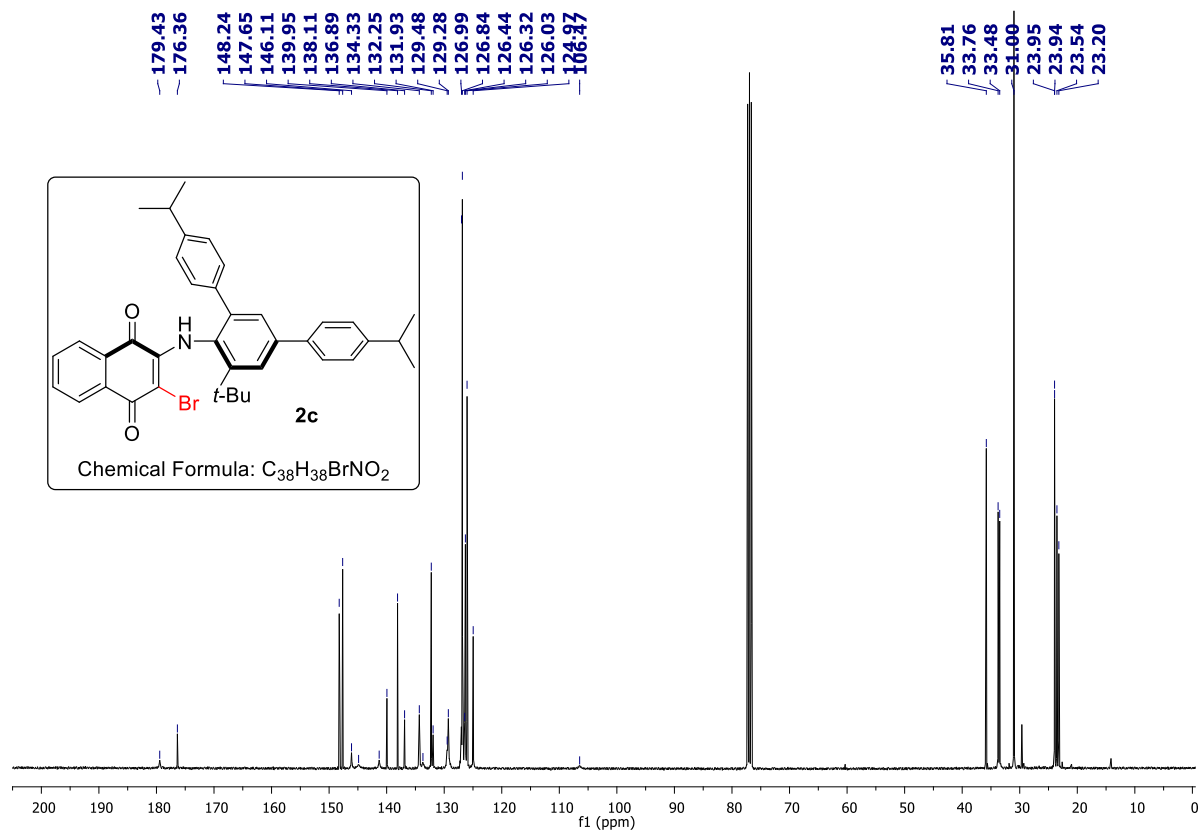

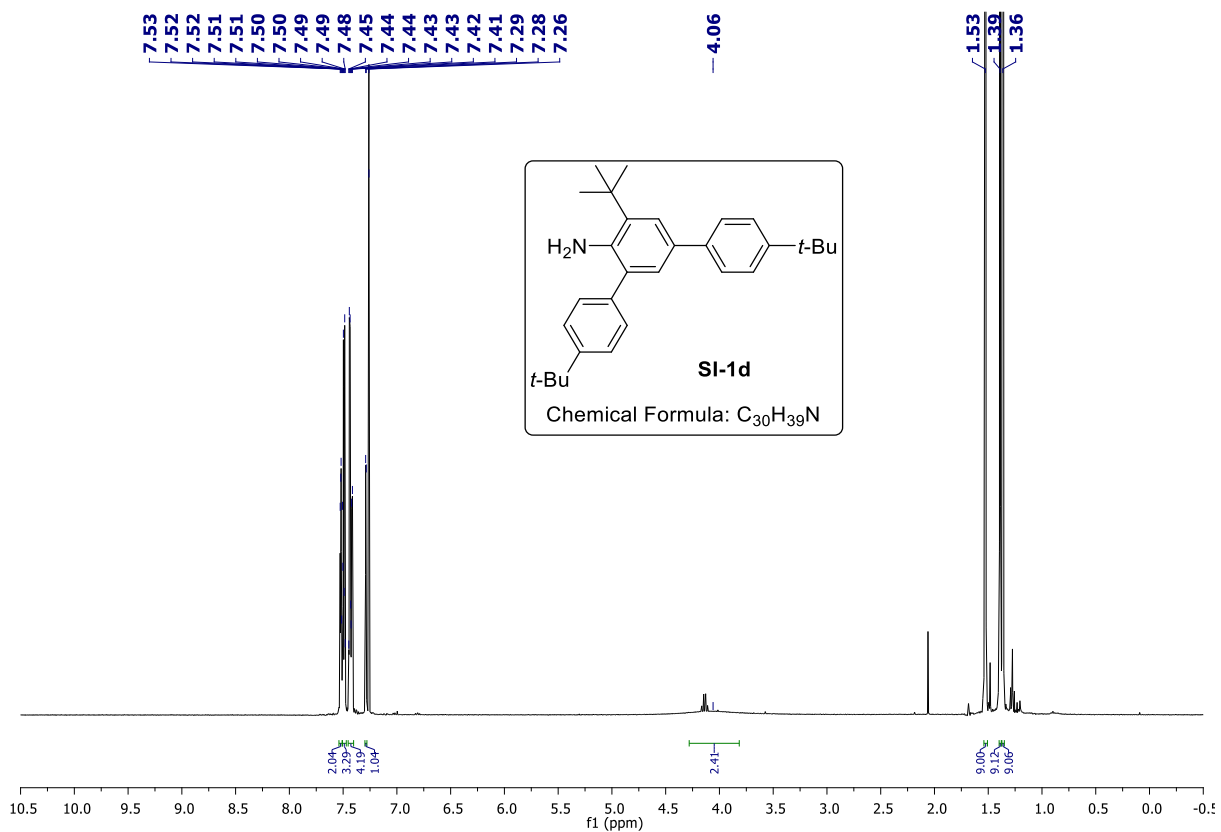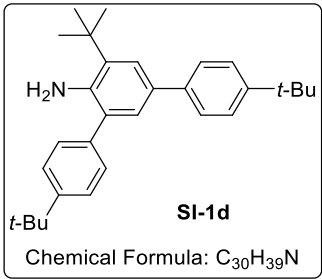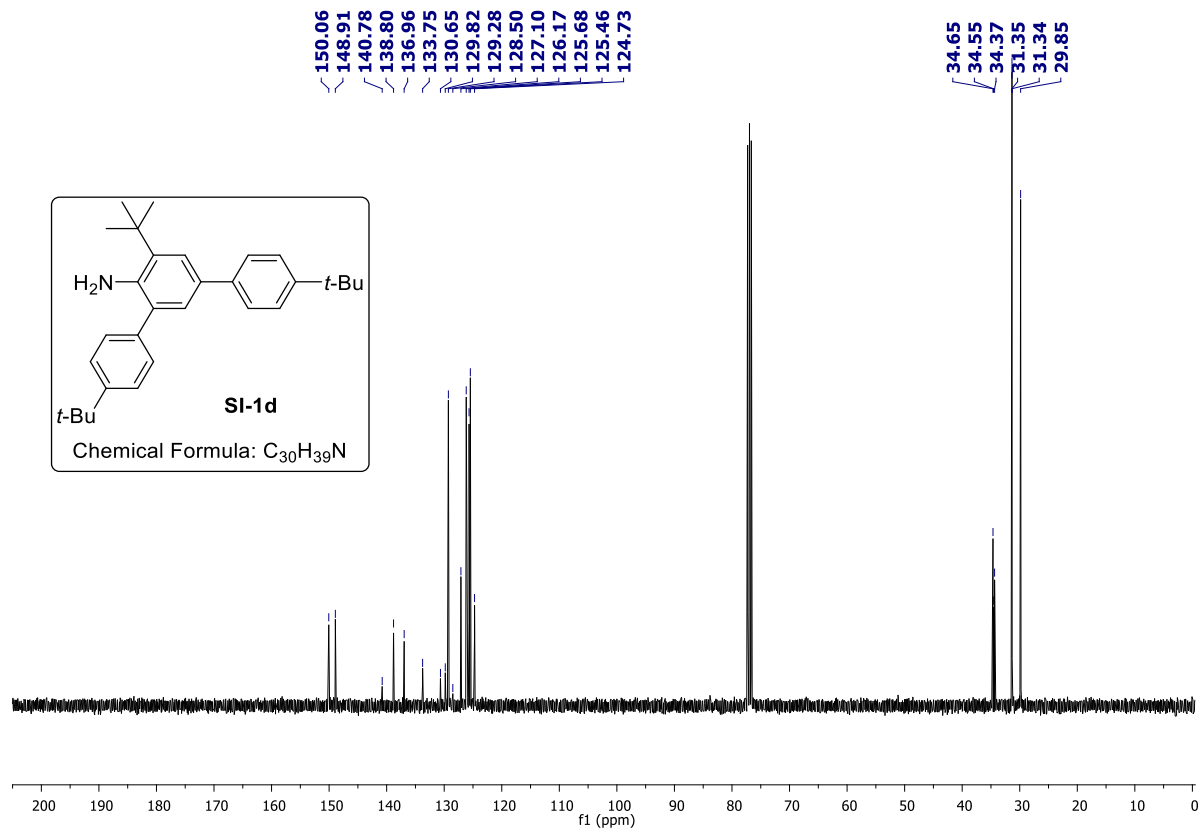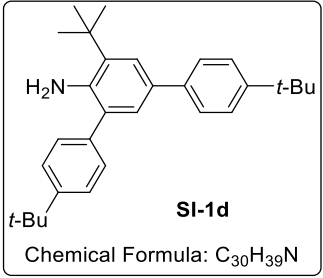

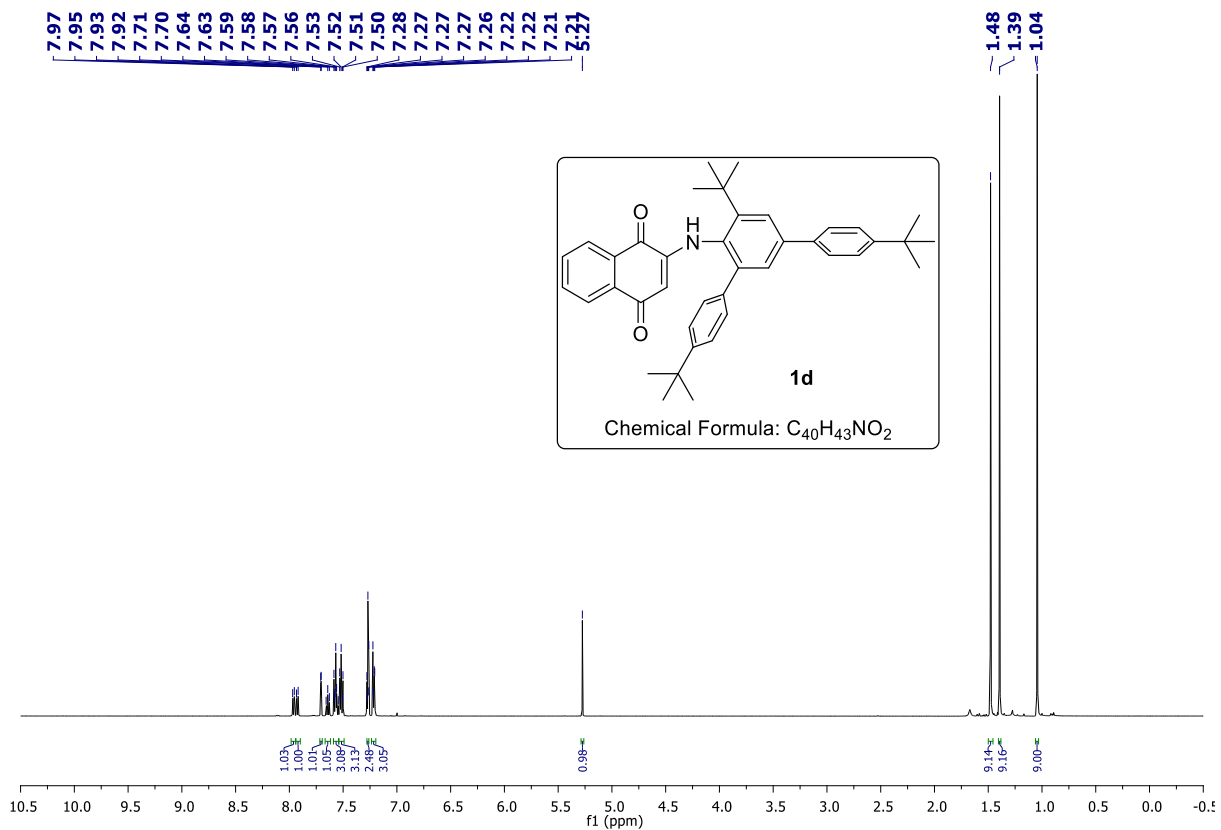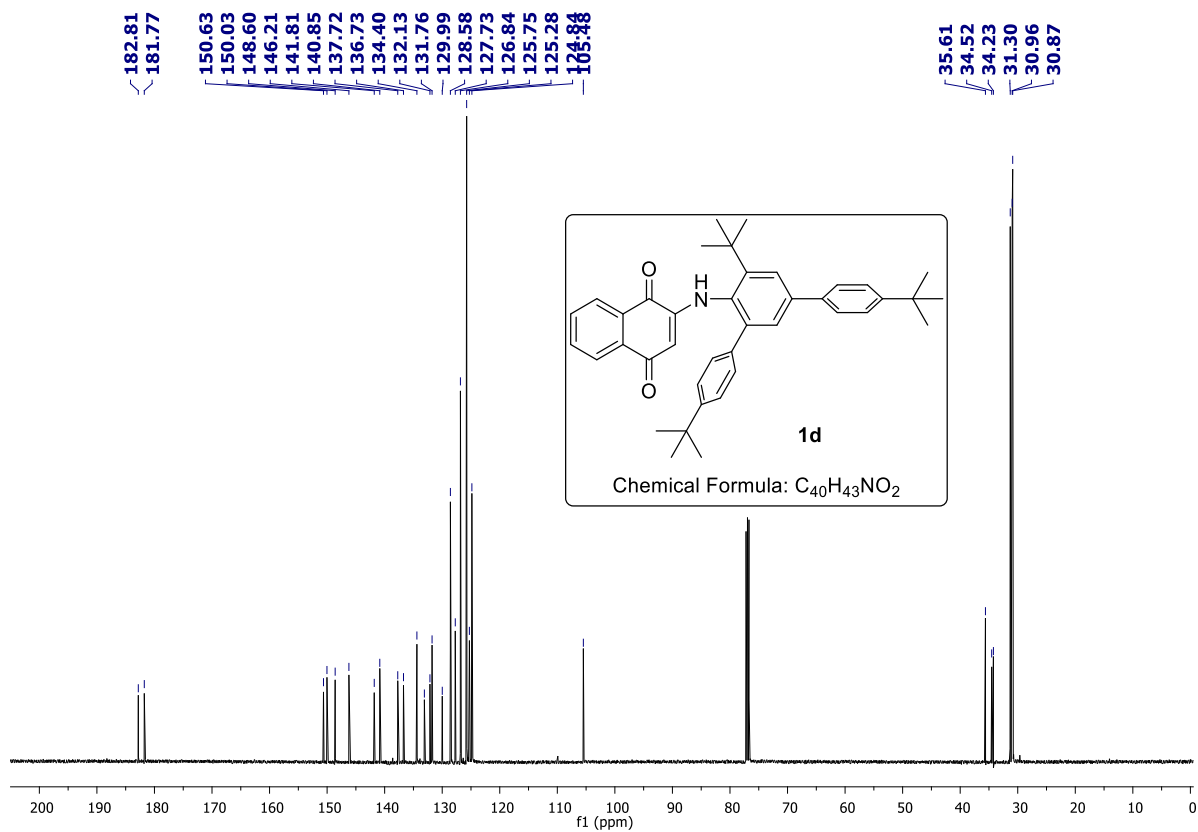

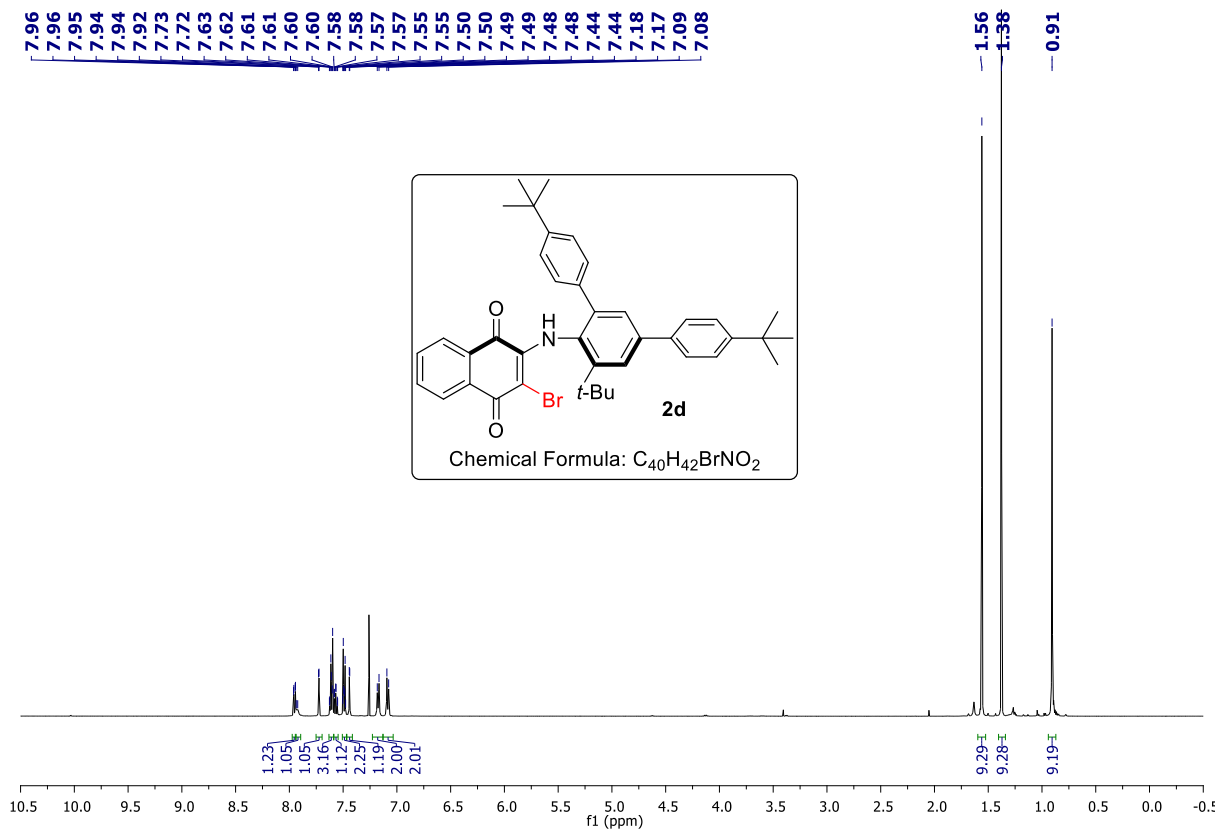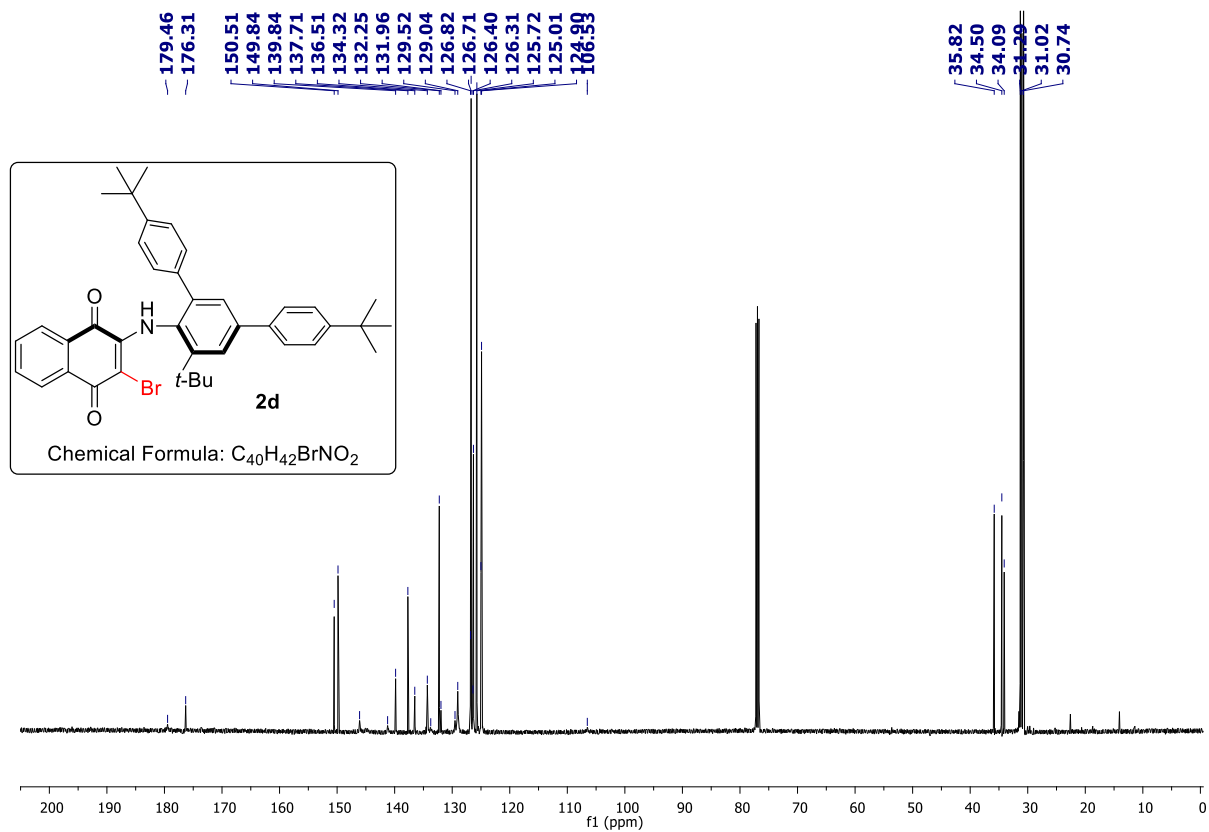



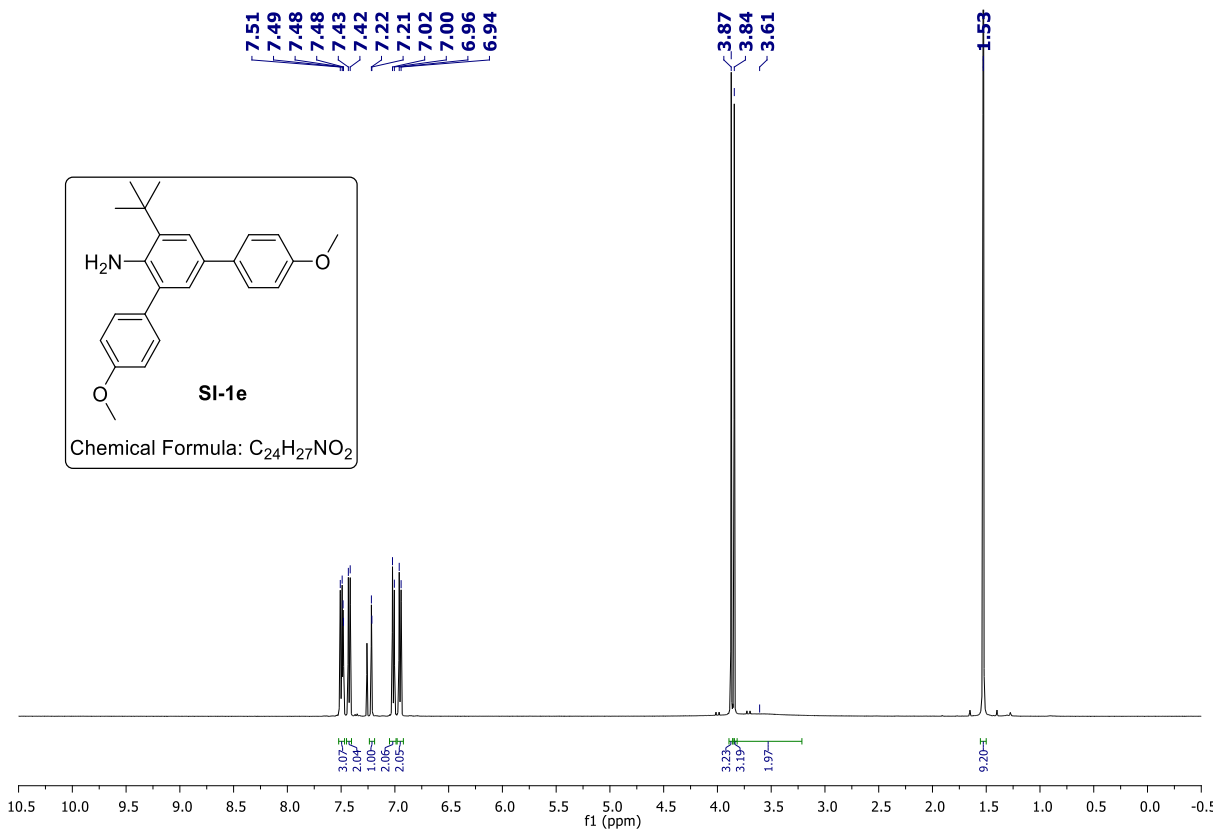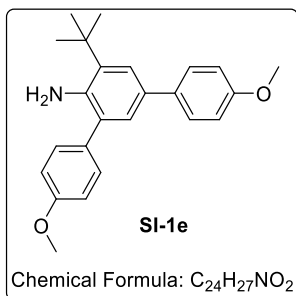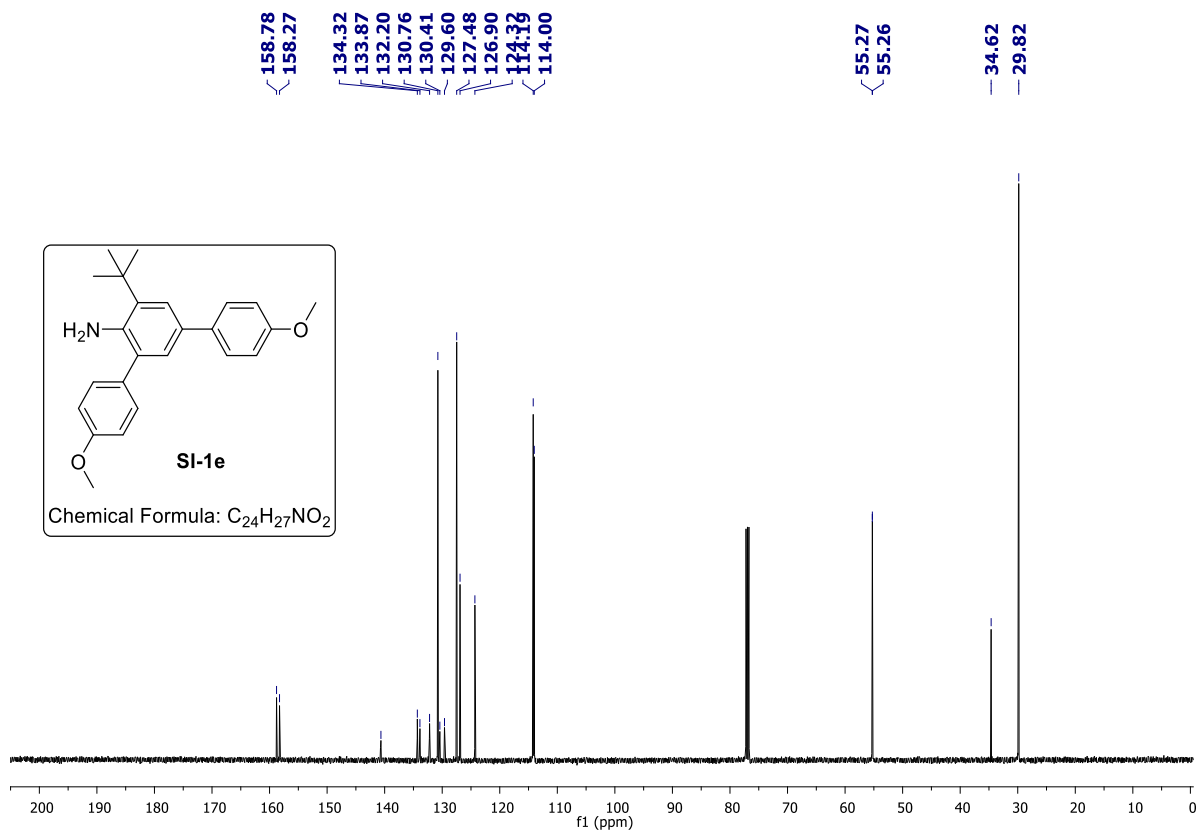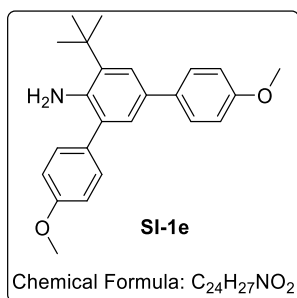

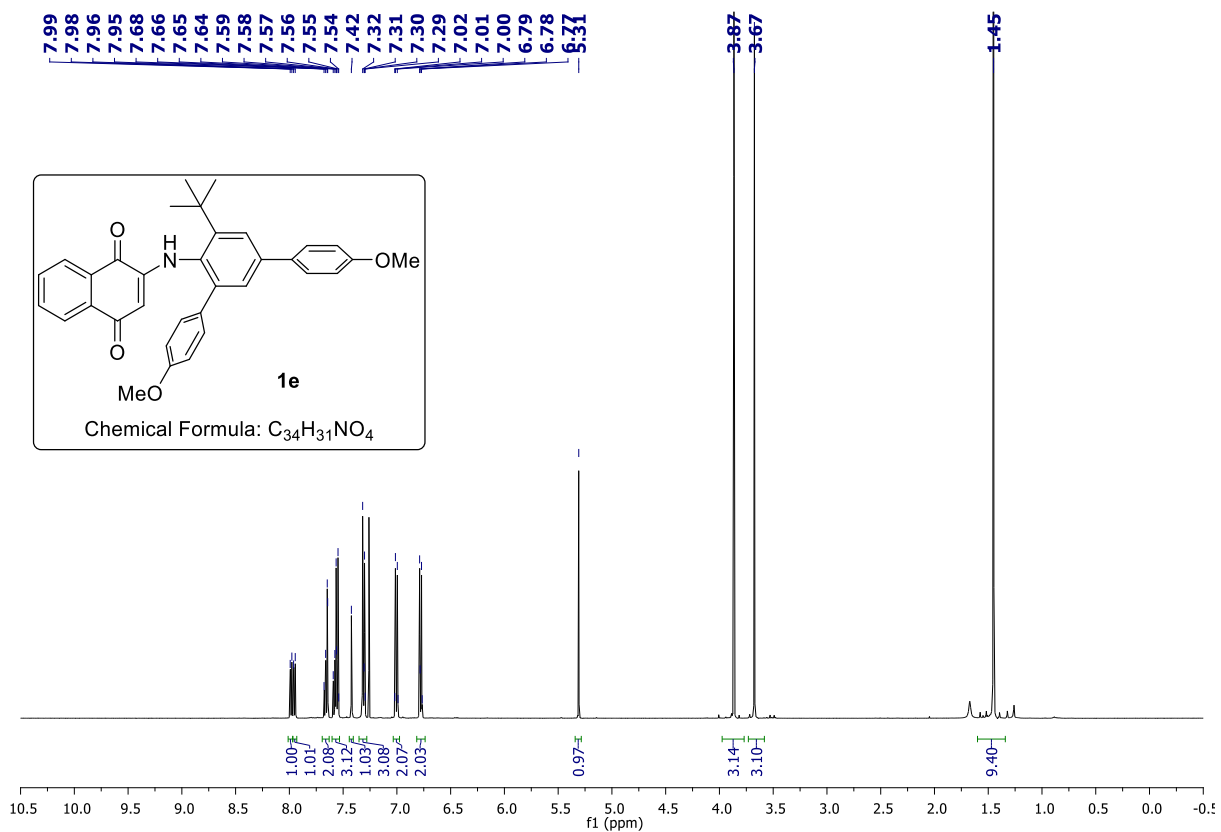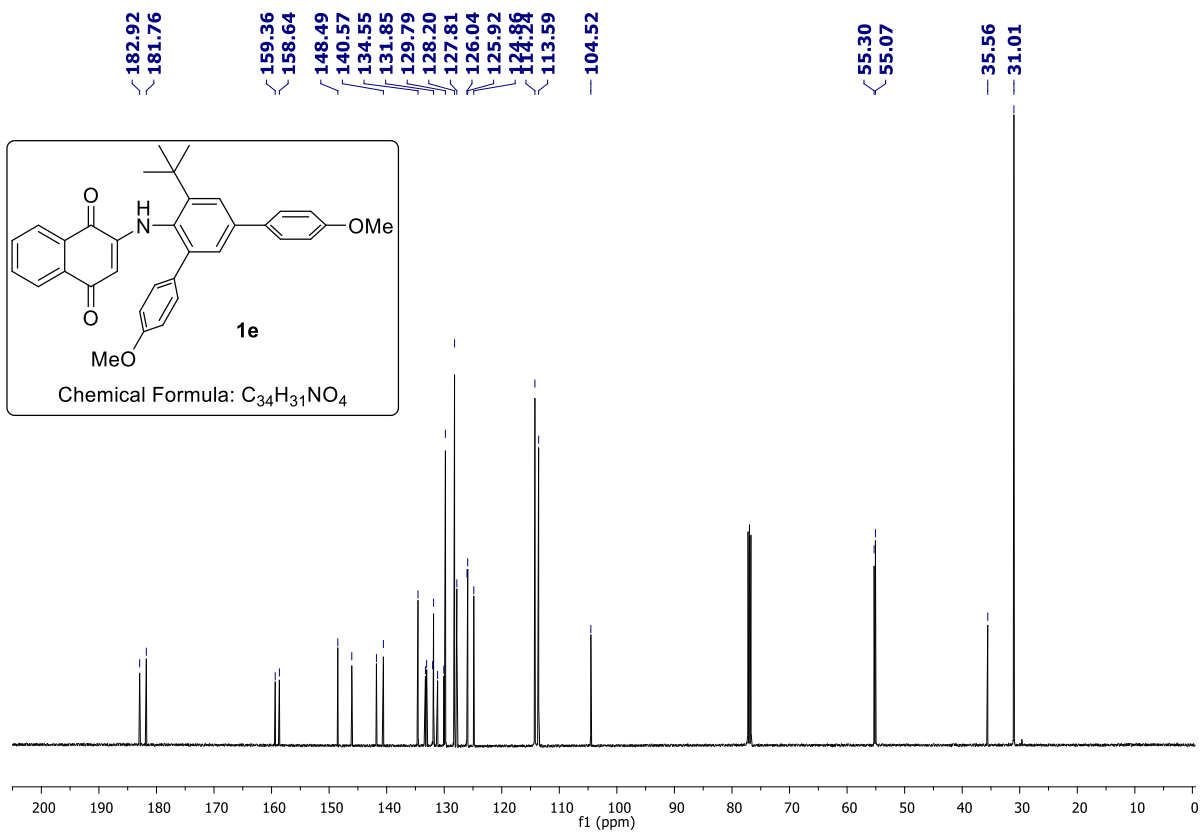

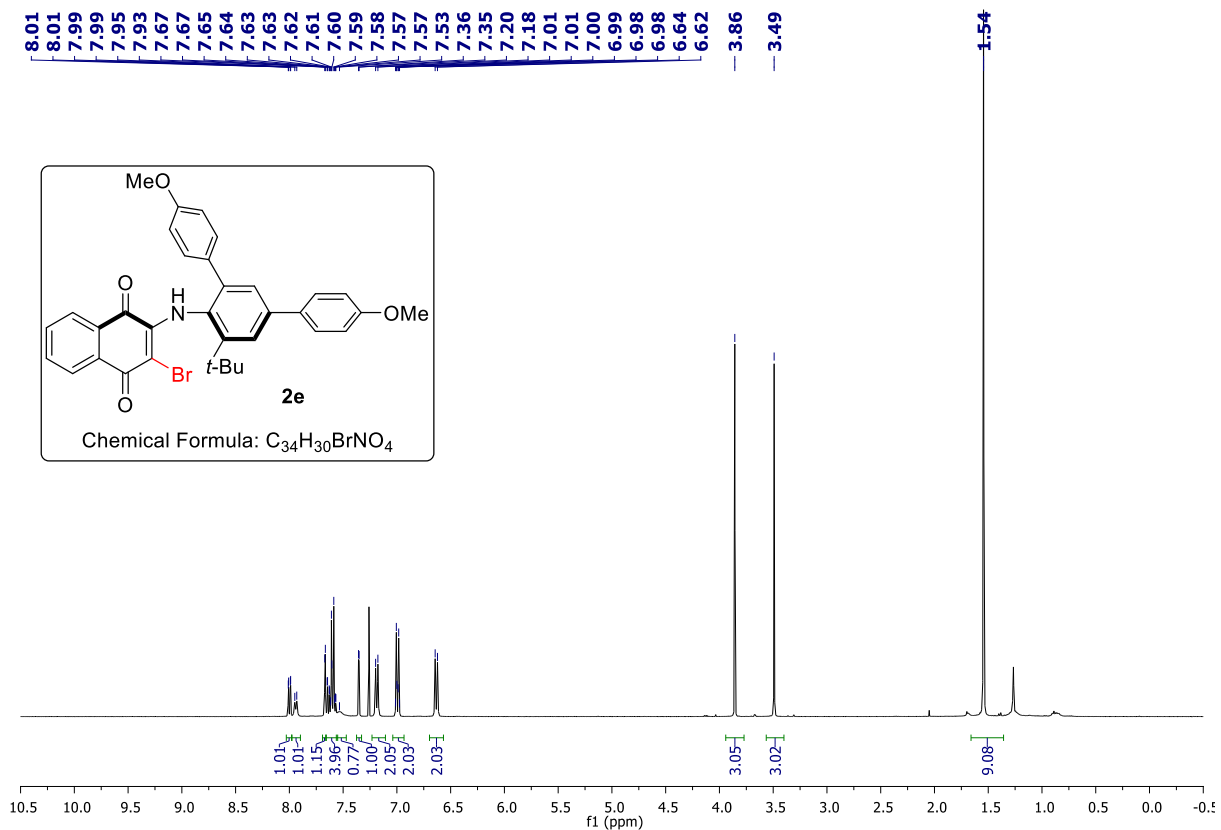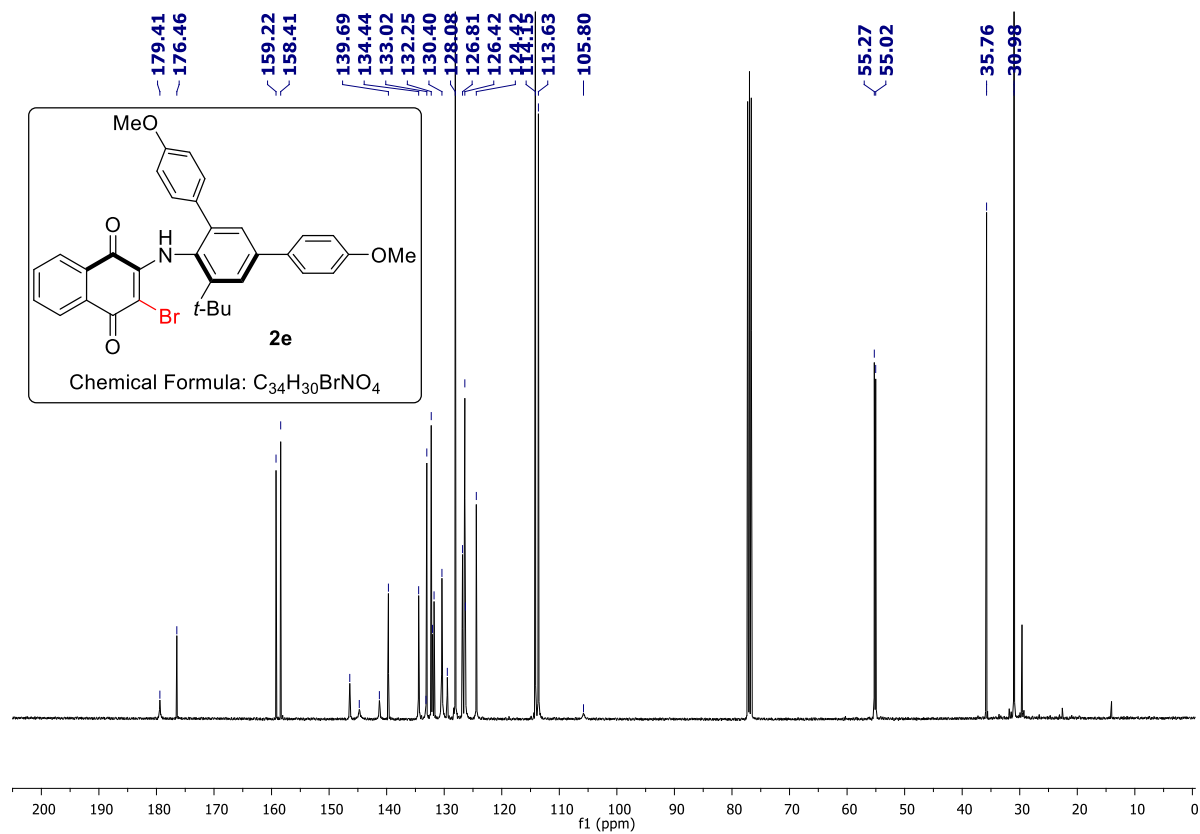

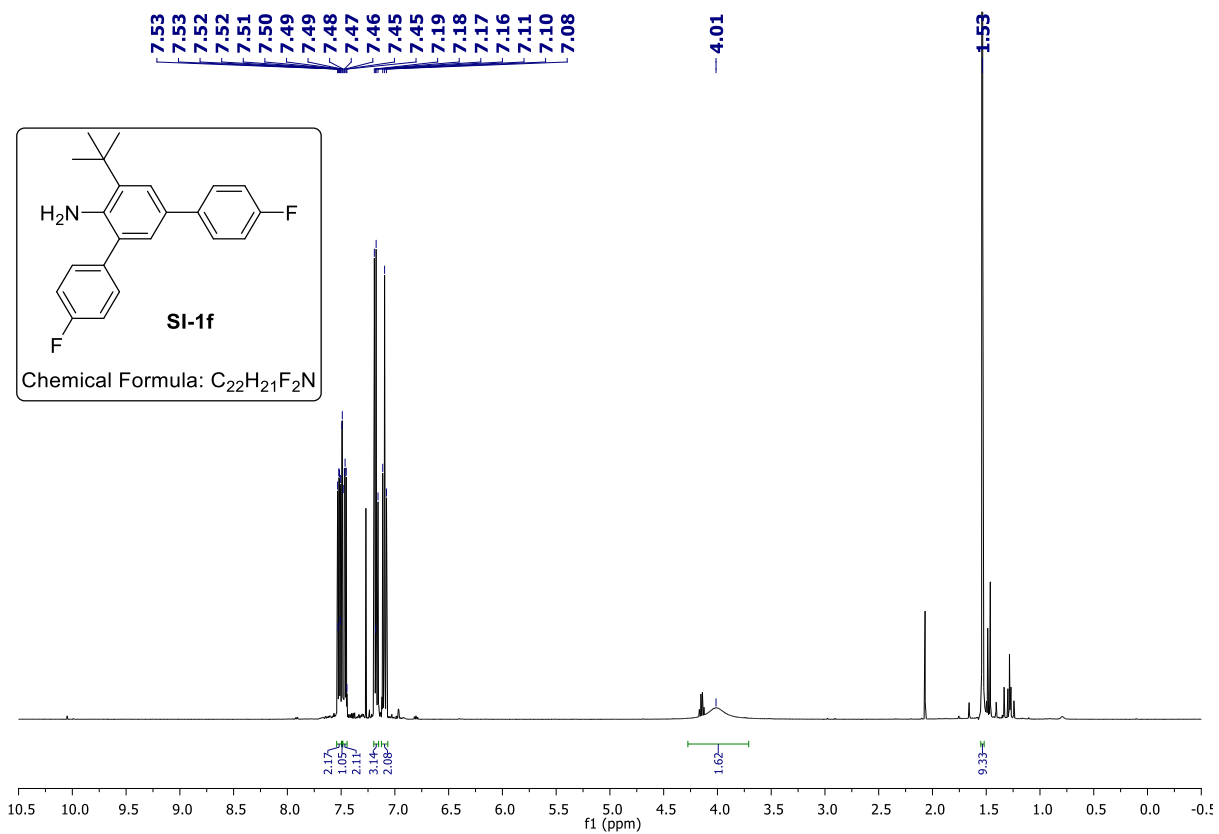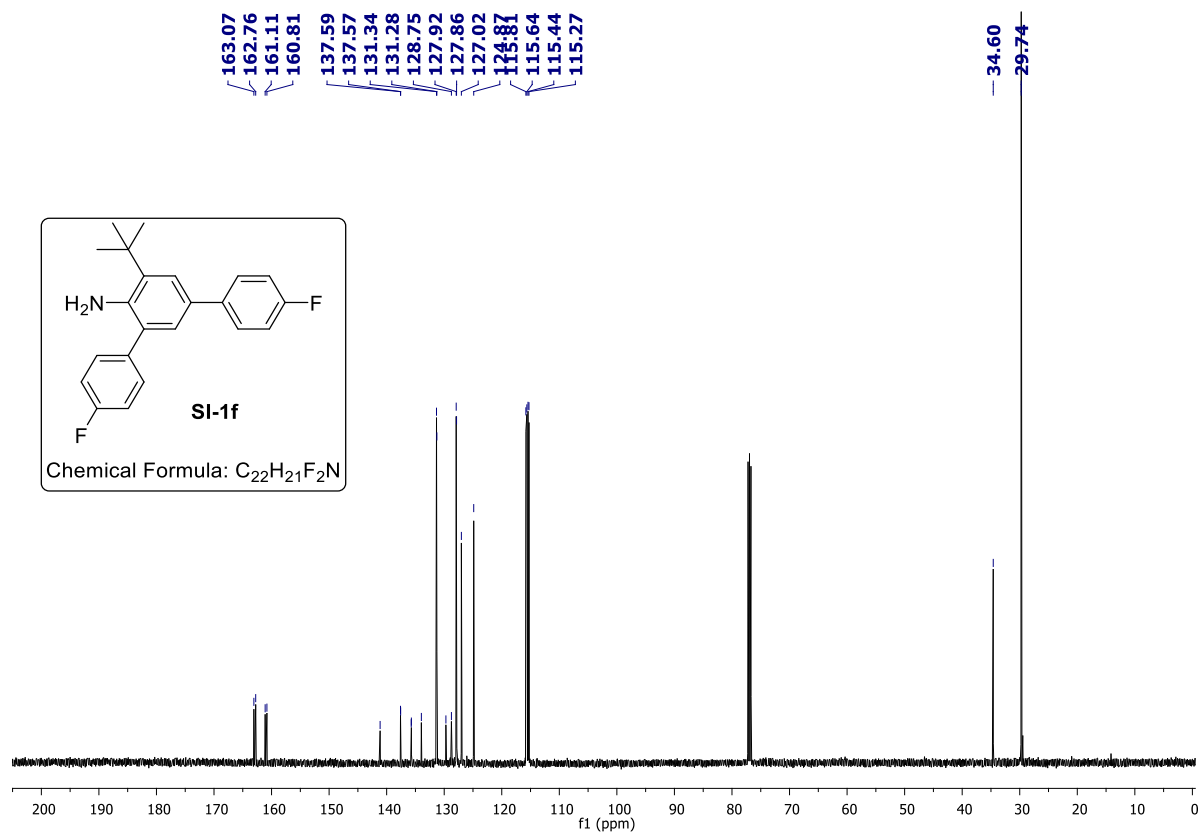

-114.89  
-114.89  
-114.90  
-114.91  
-114.92  
-117.30  
-117.31  
-117.32  
-117.33

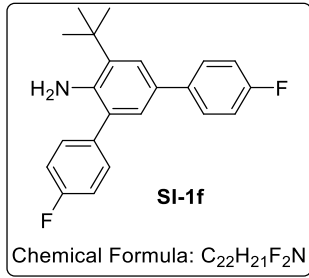

B (m)  
-117.32  
A (m)  
-114.90

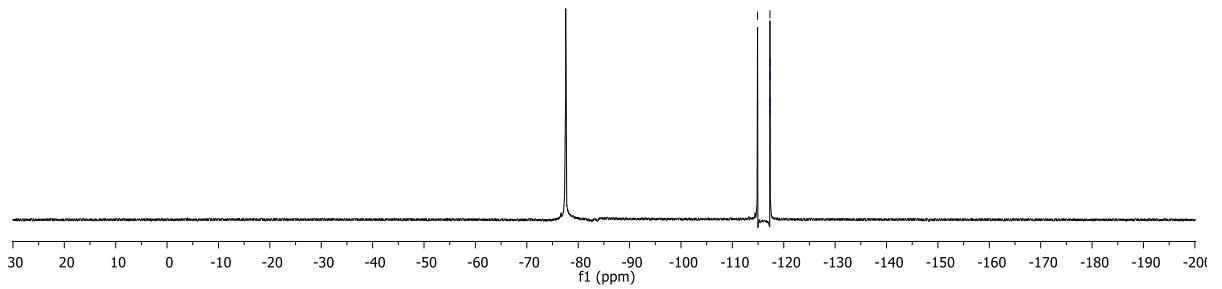

7.99  
7.96  
7.69  
7.69  
7.68  
7.67  
7.60  
7.60  
7.59  
7.58  
7.57  
7.41  
7.41  
7.37  
7.36  
7.36  
7.35  
7.31  
7.19  
7.17  
7.15  
6.97  
6.95  
5.93

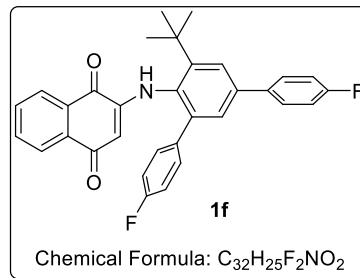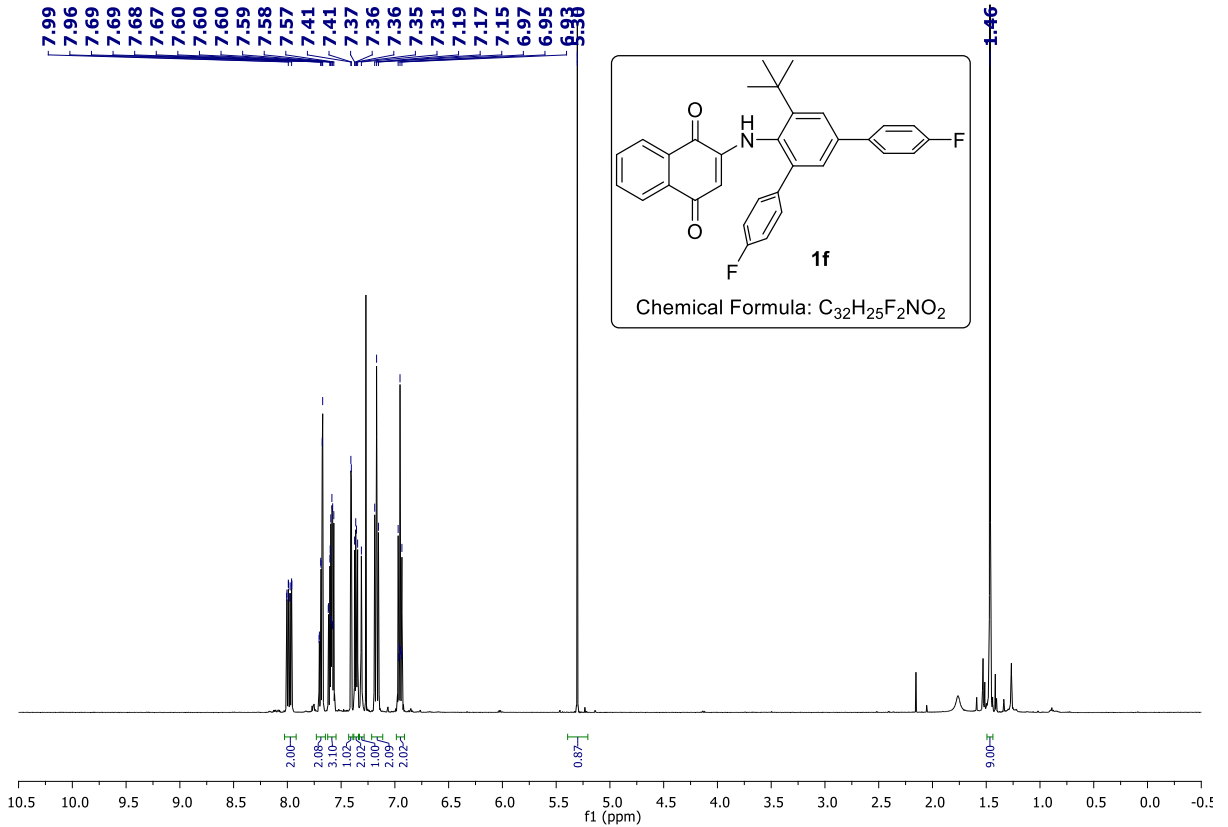

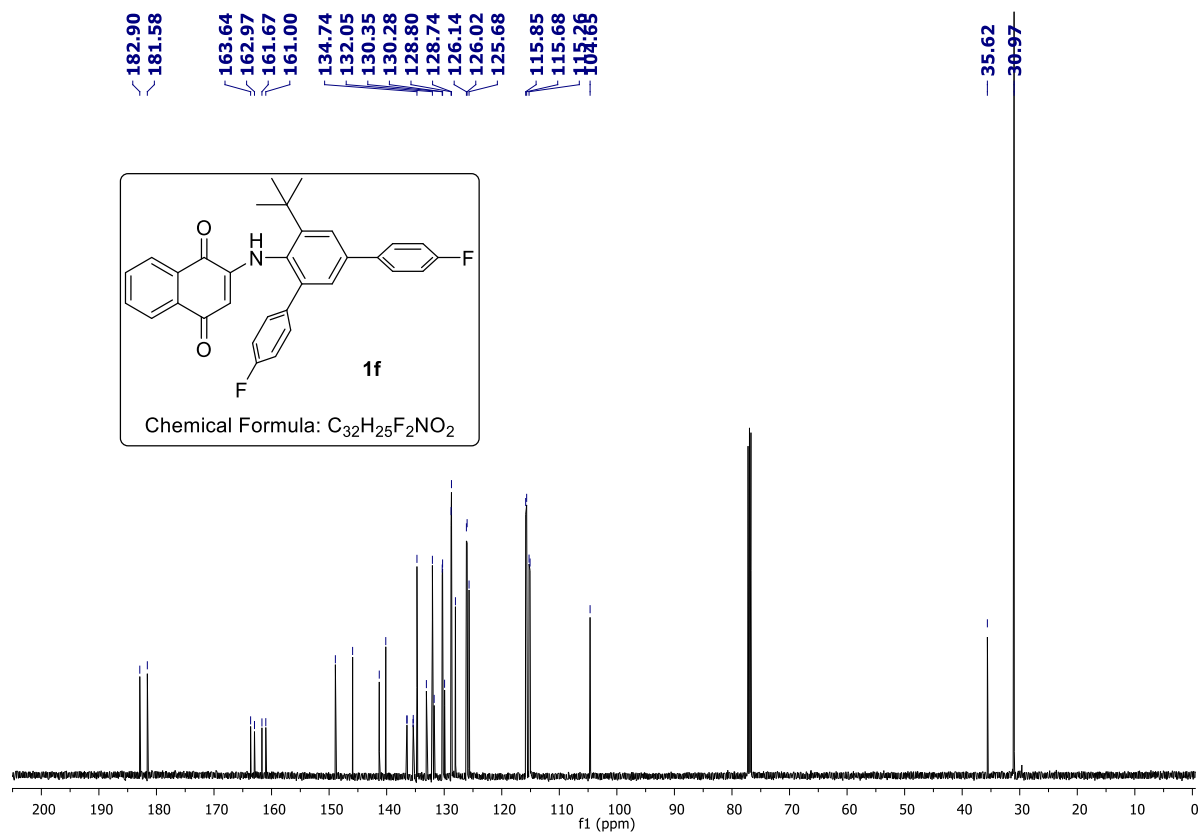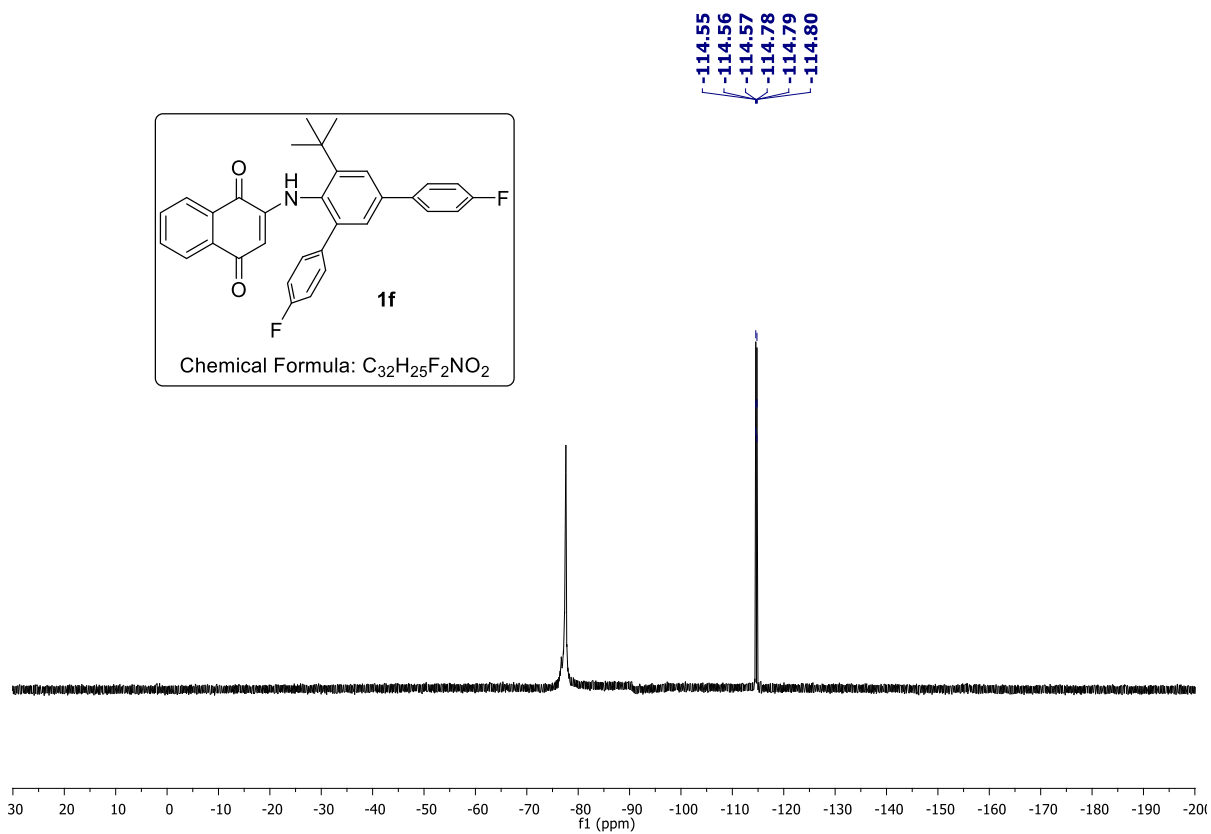

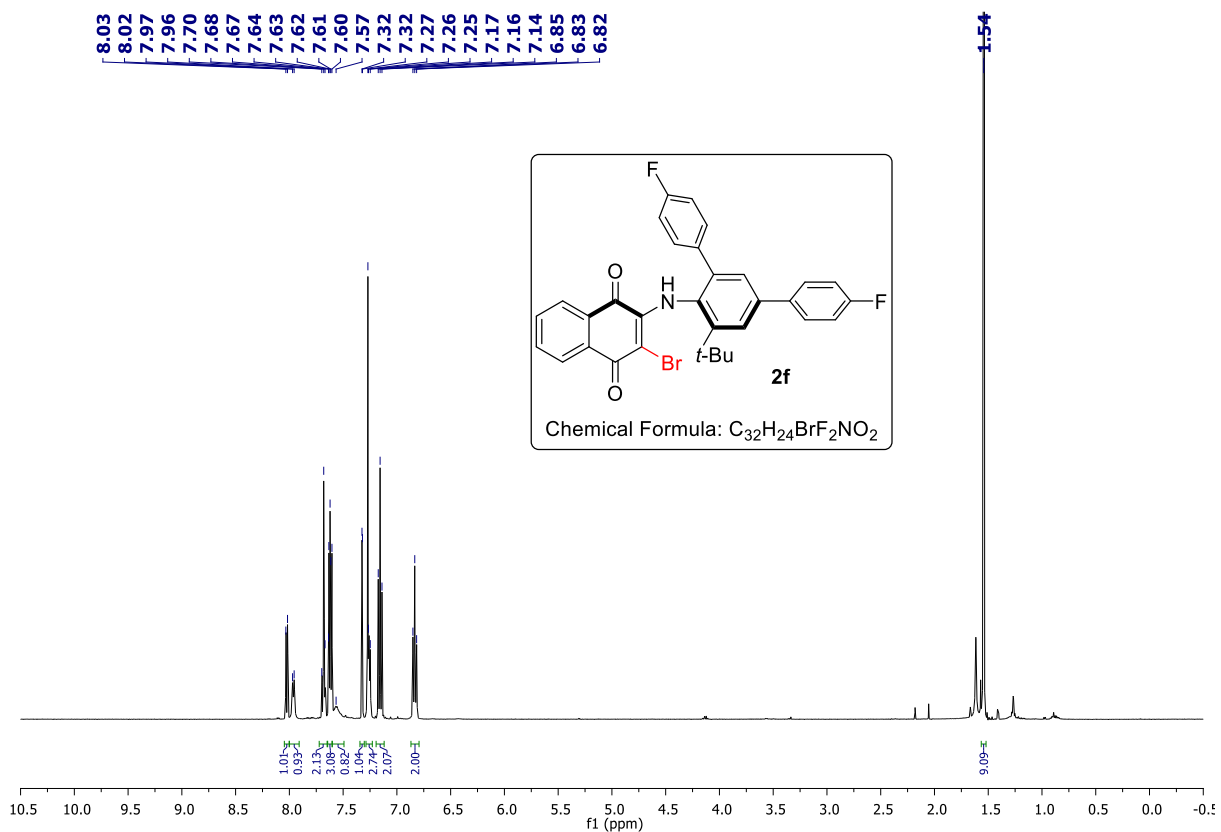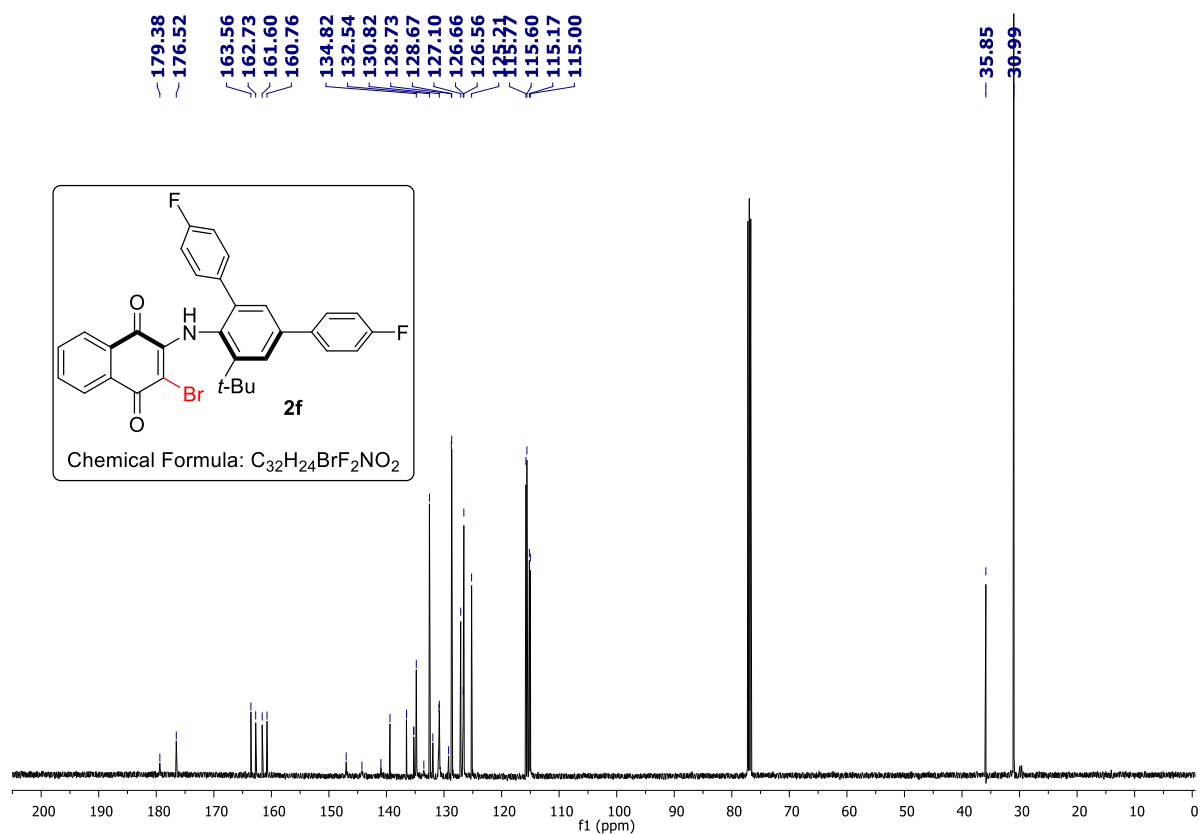

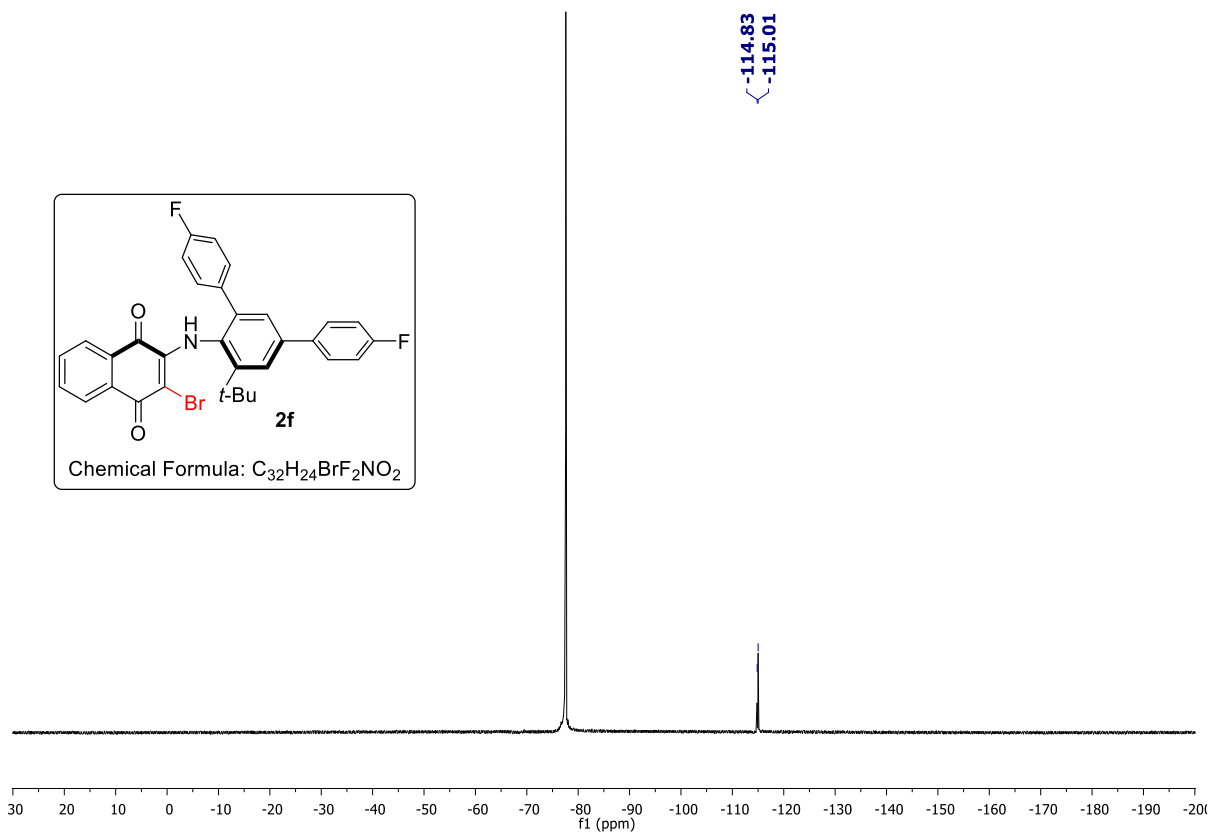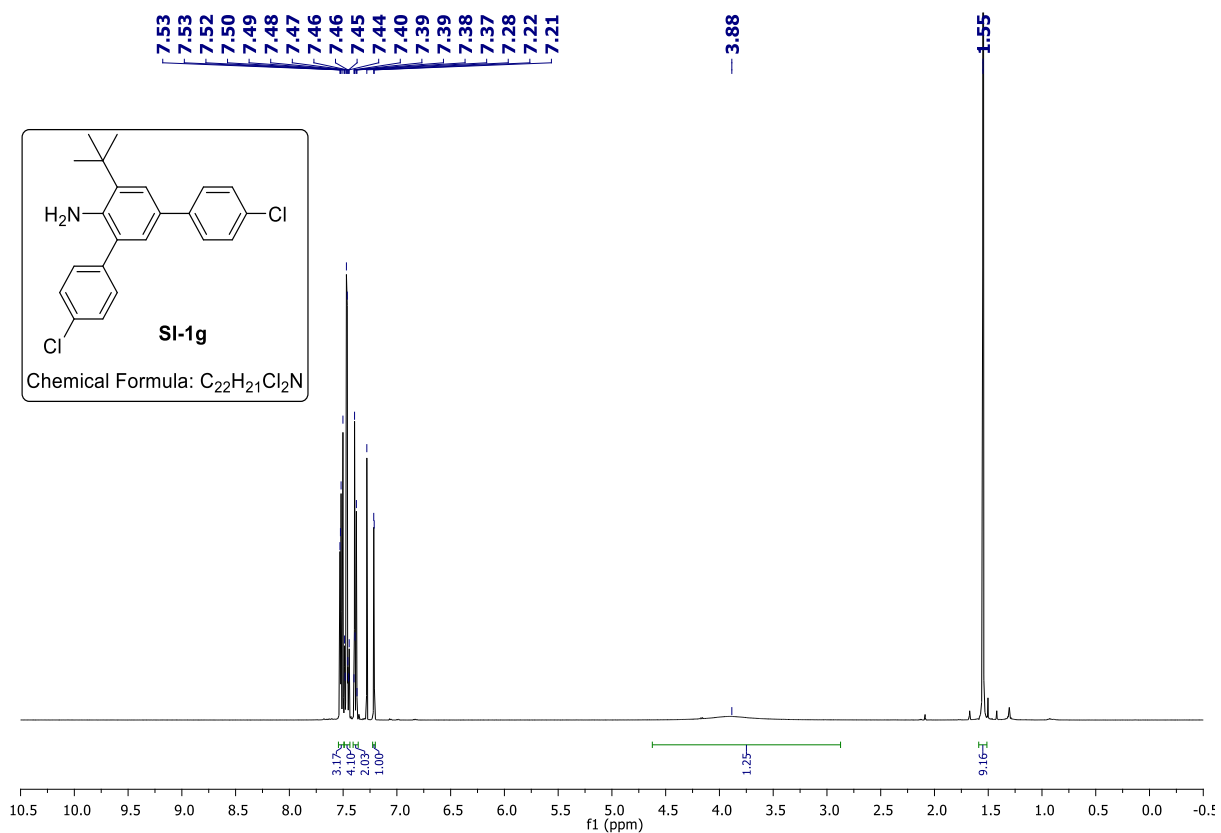



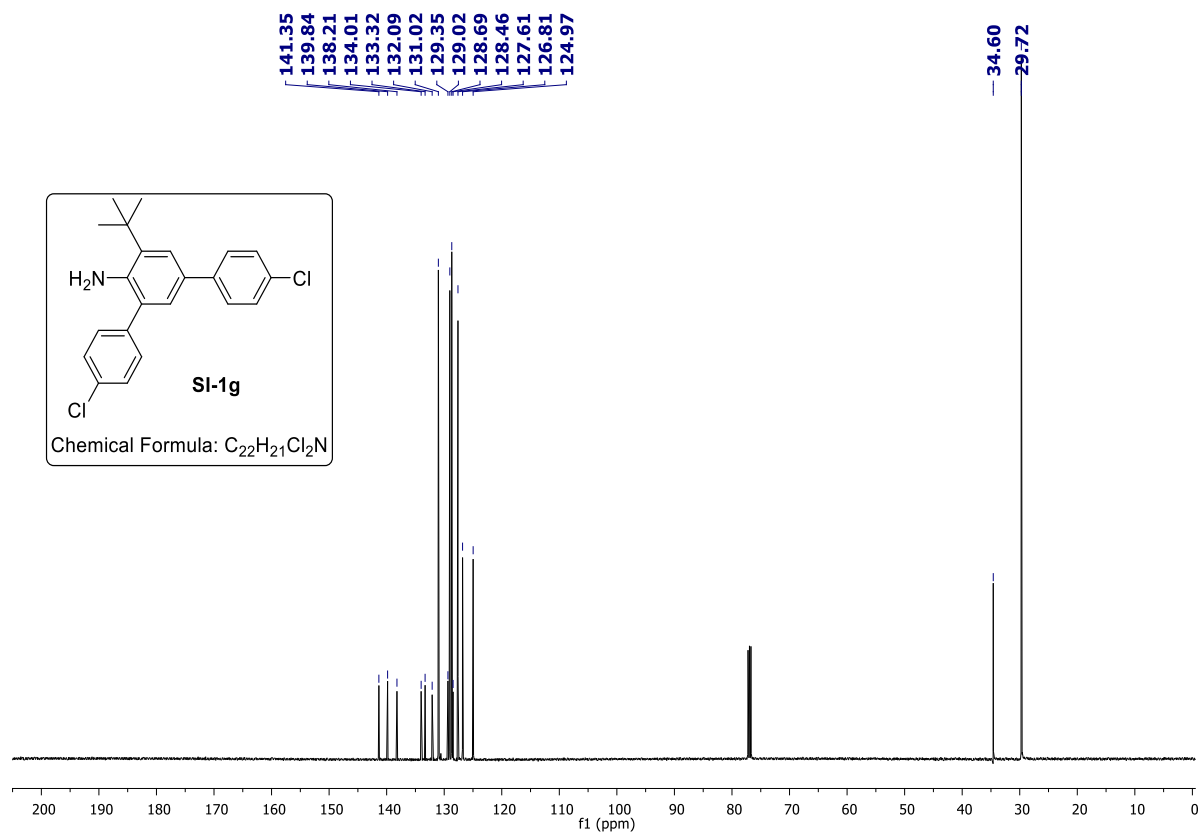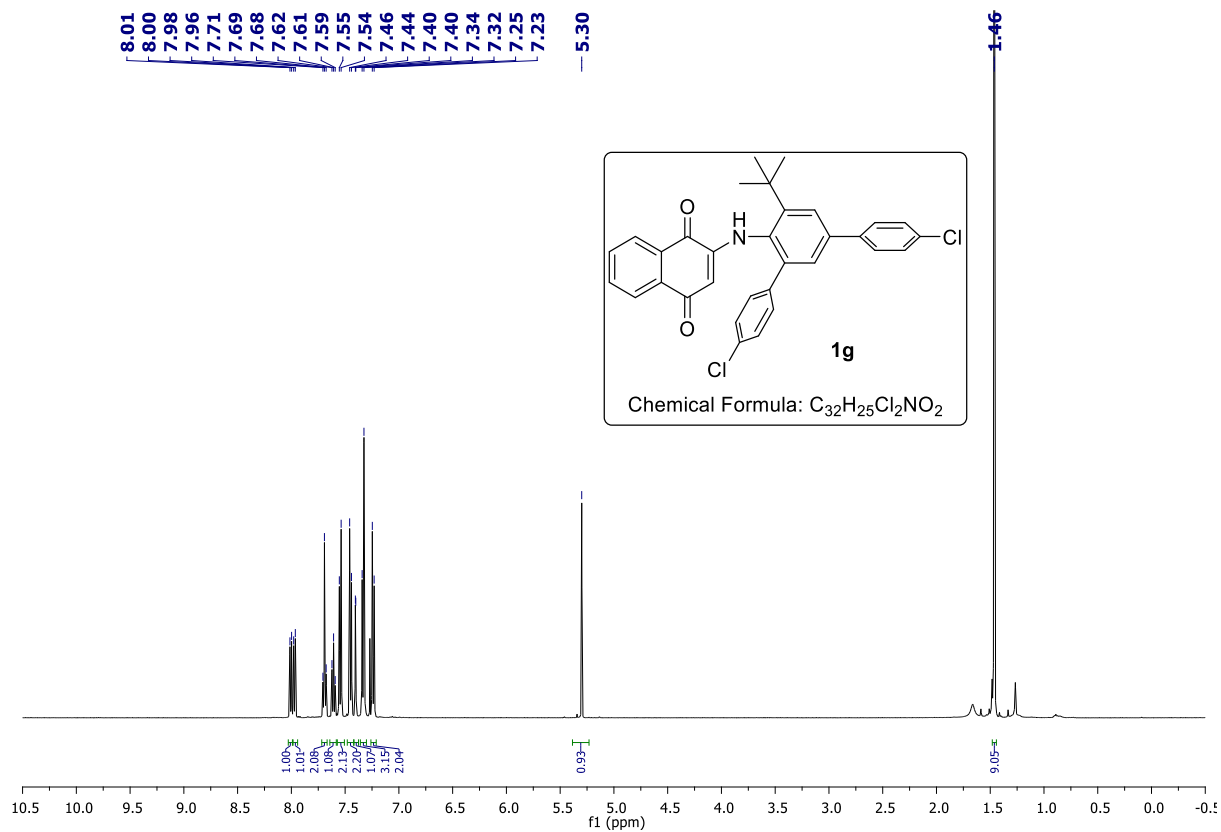

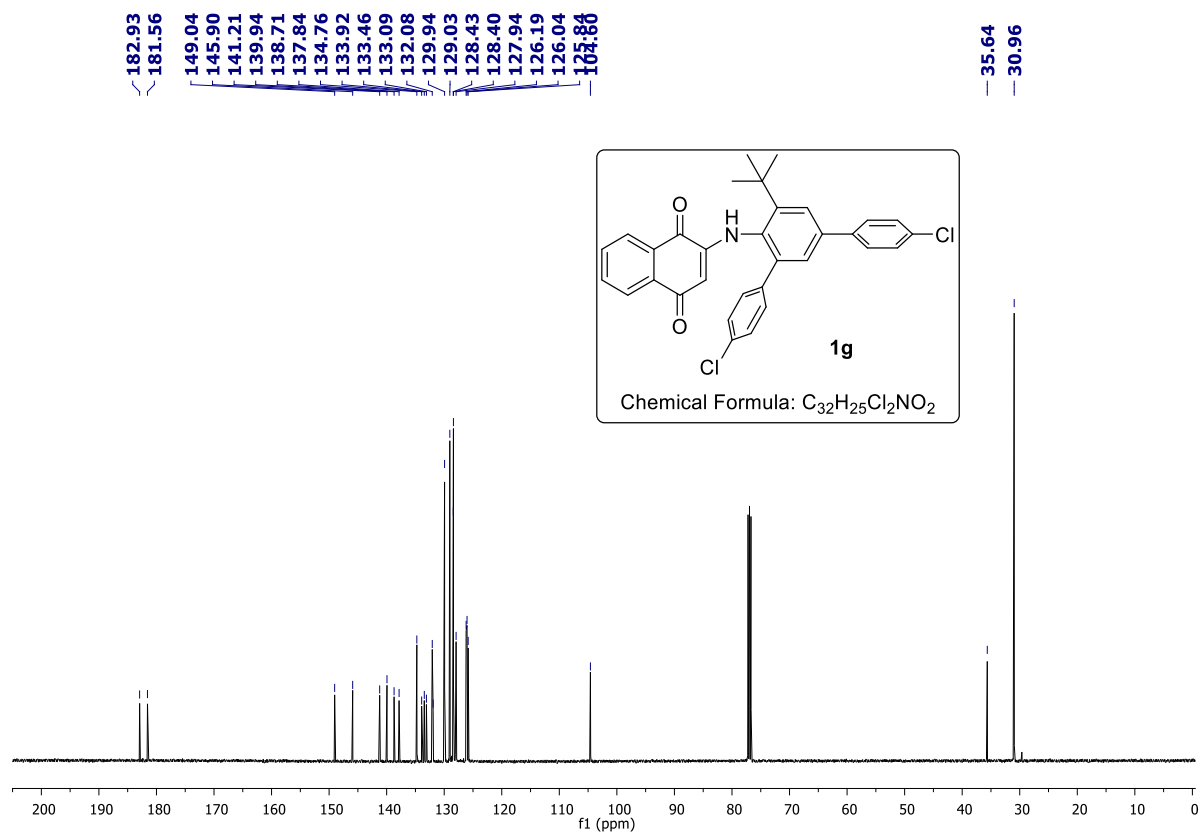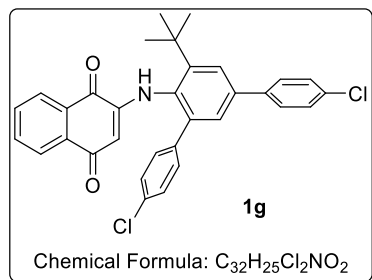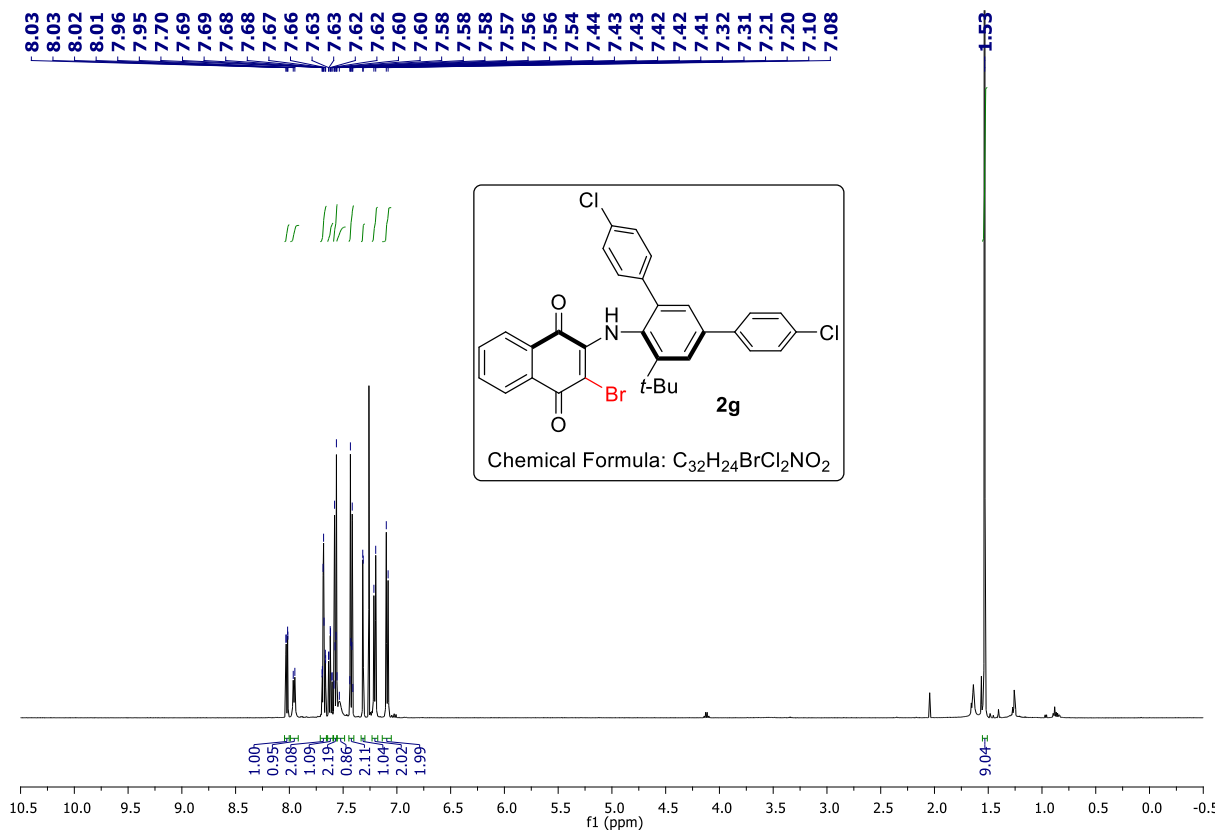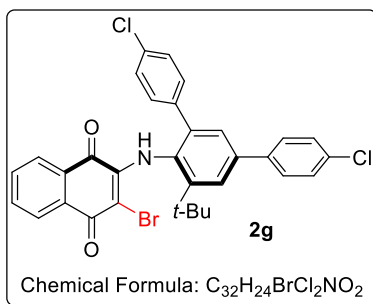

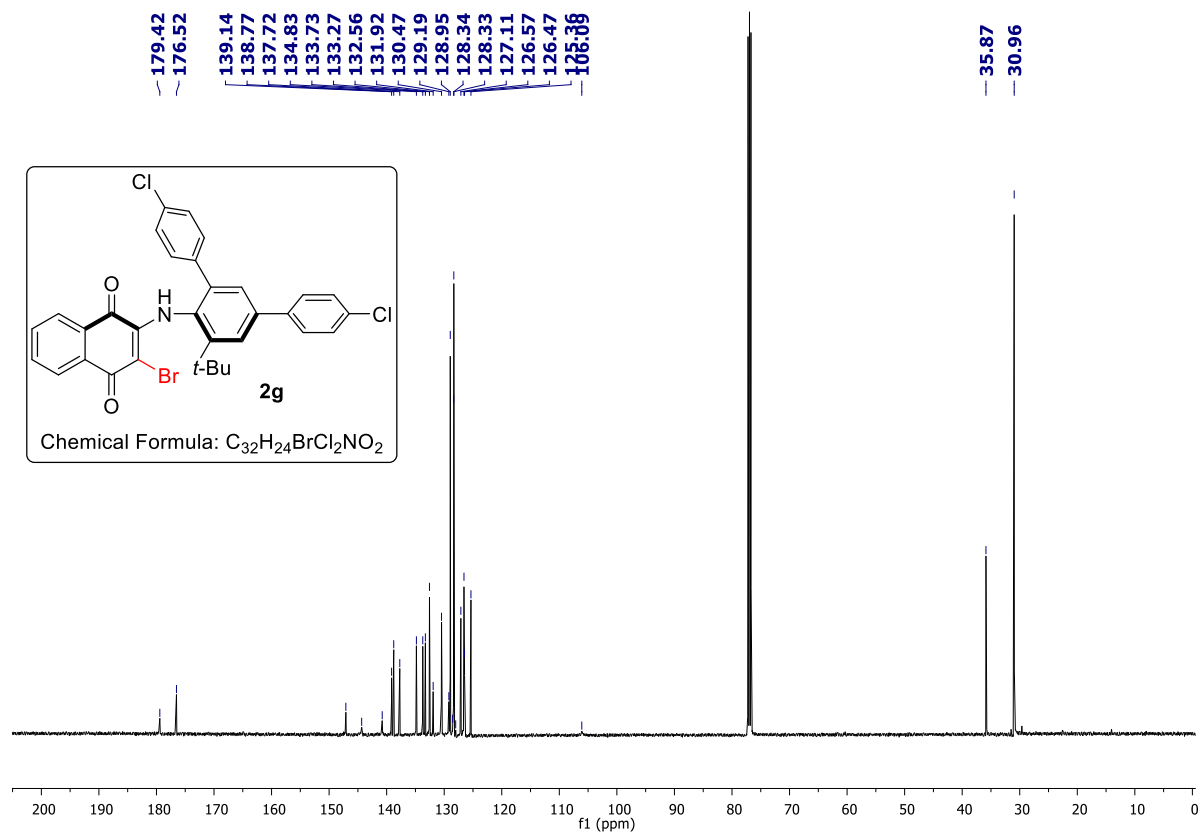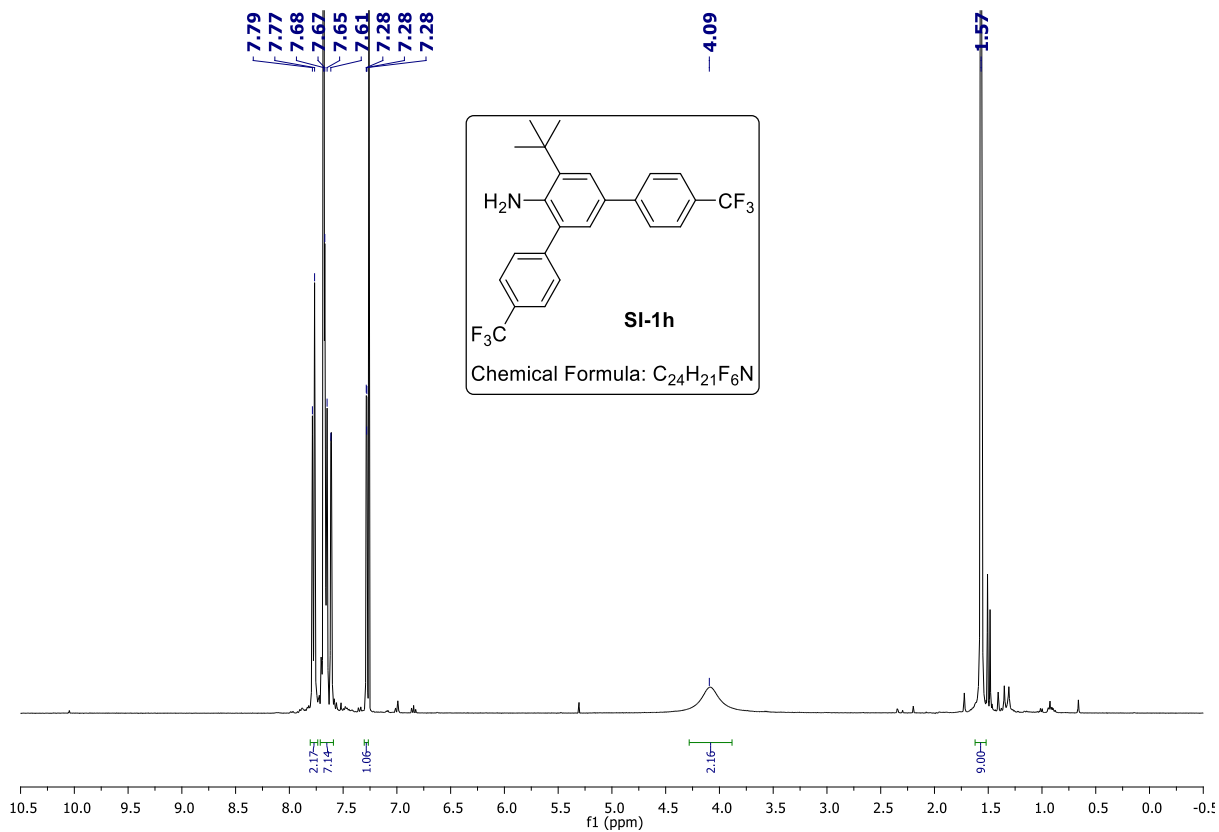

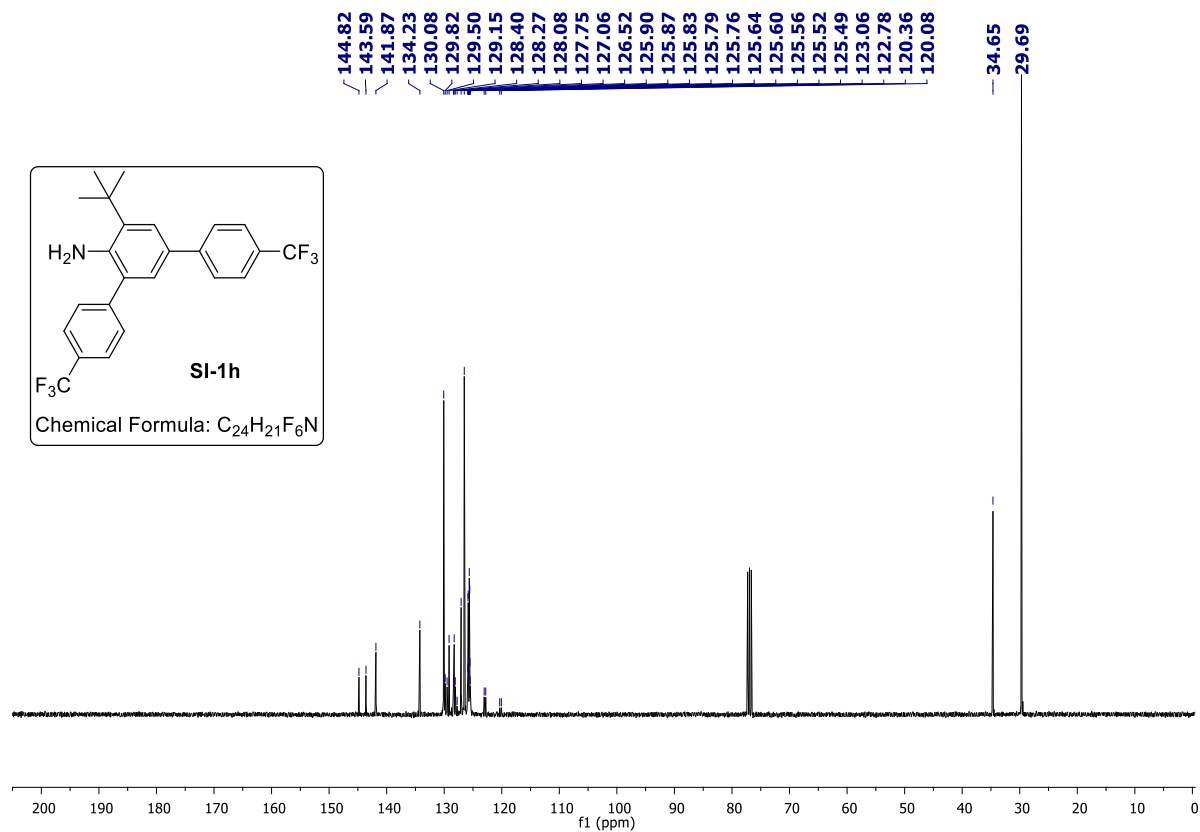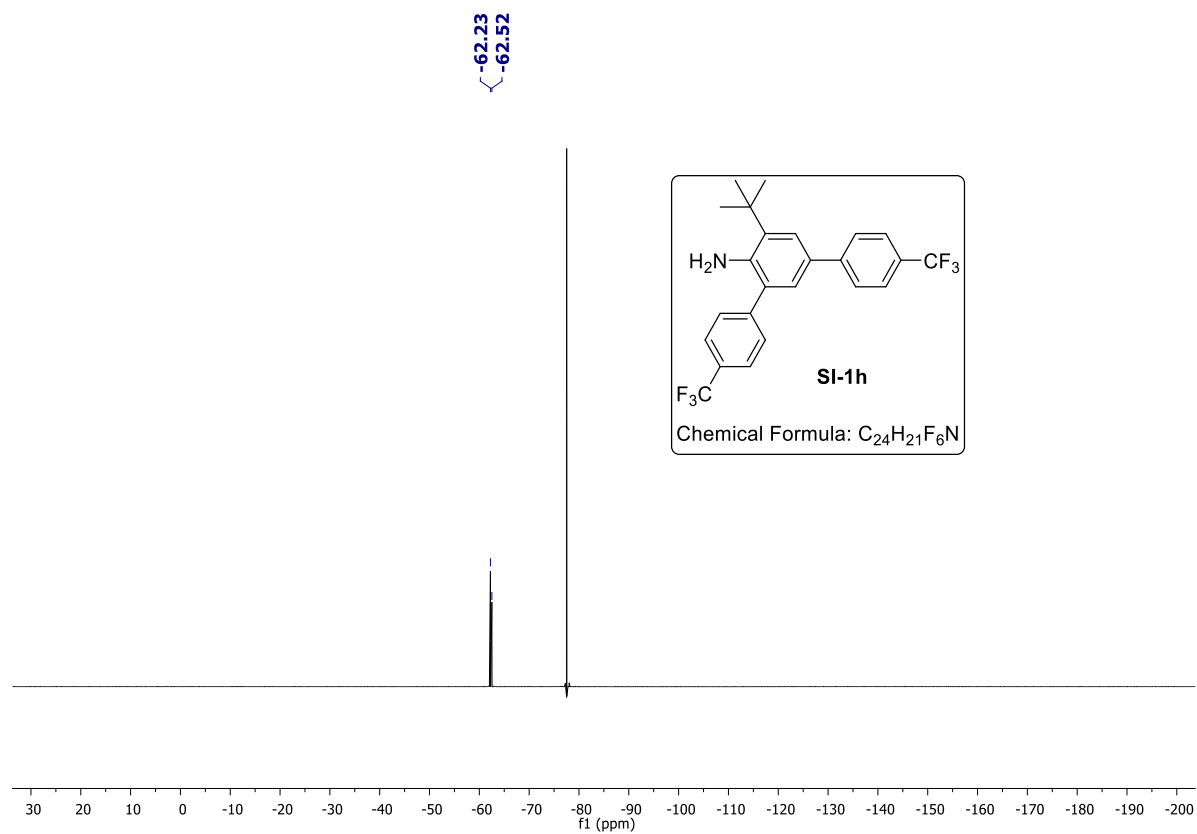

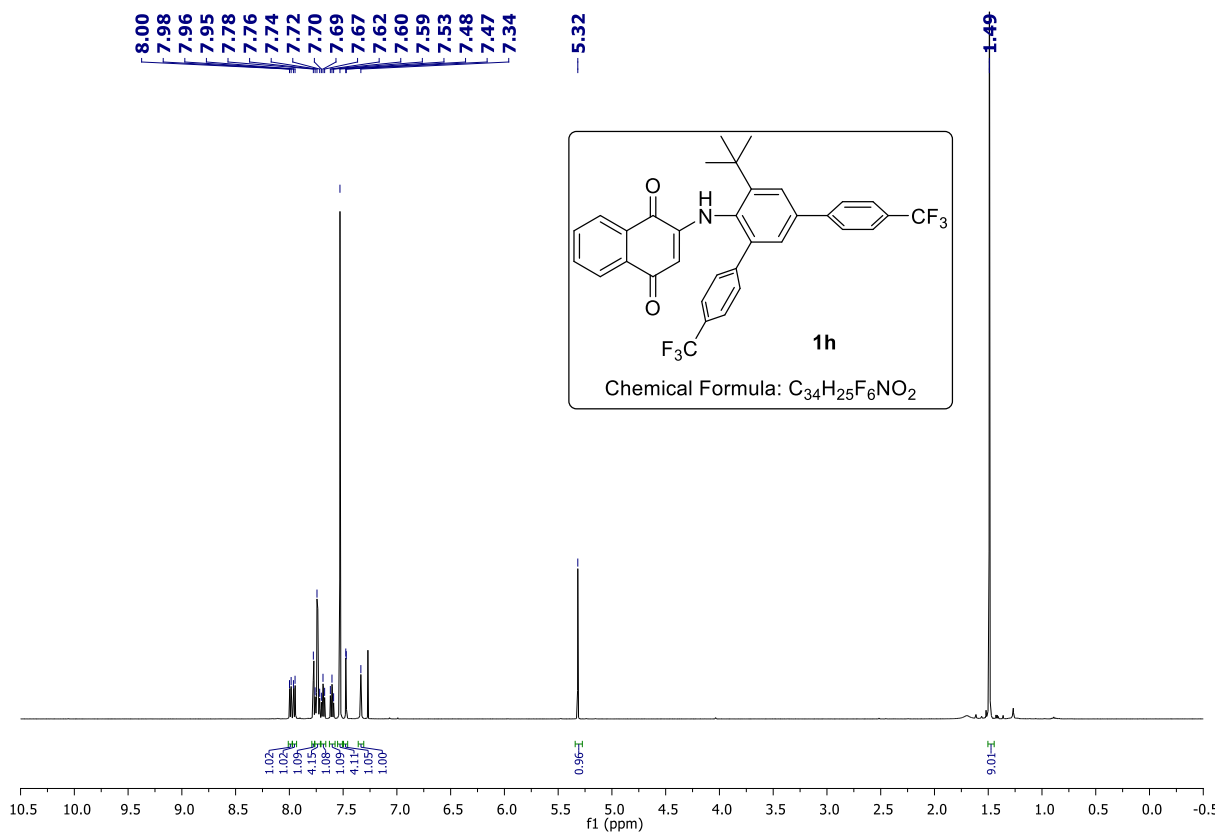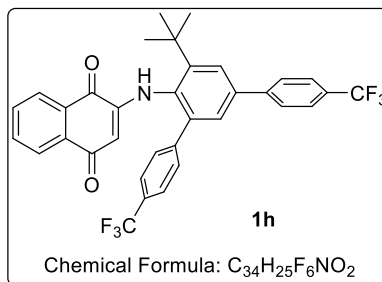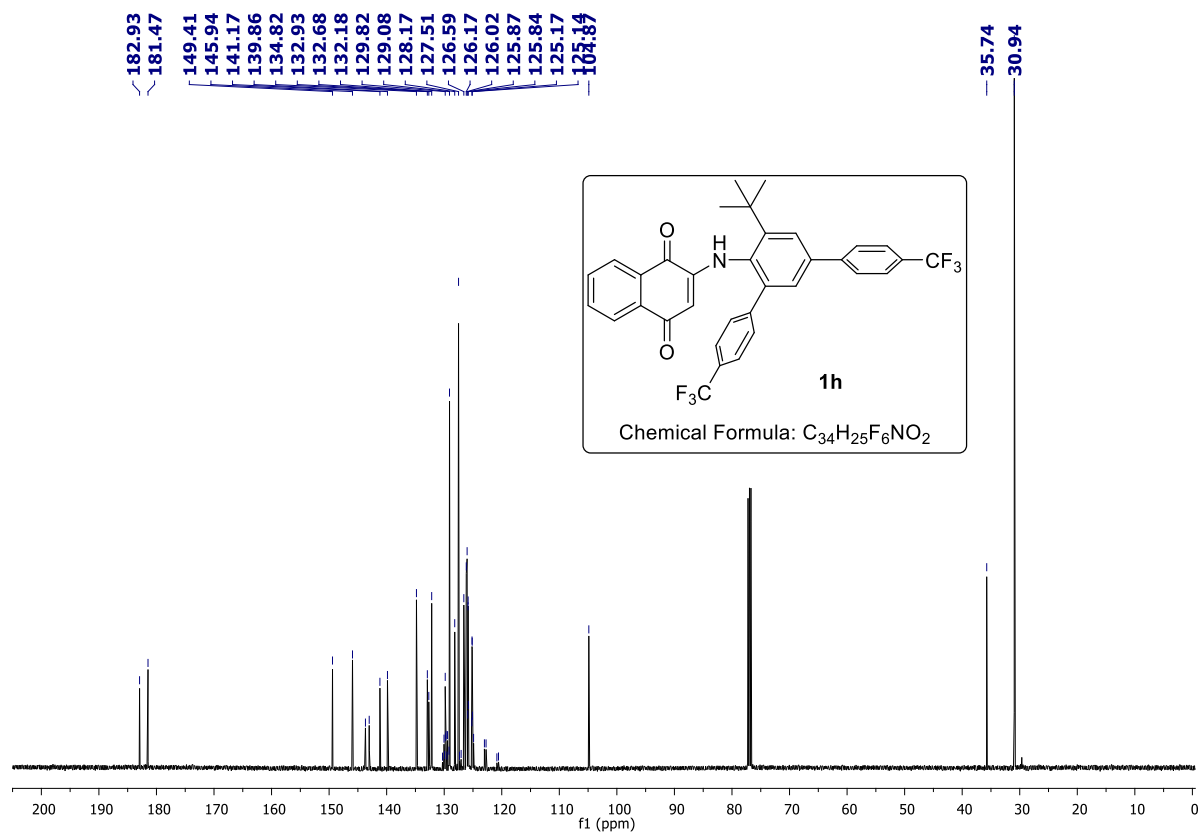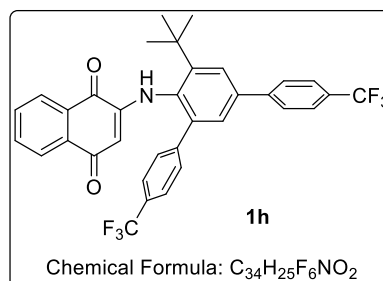

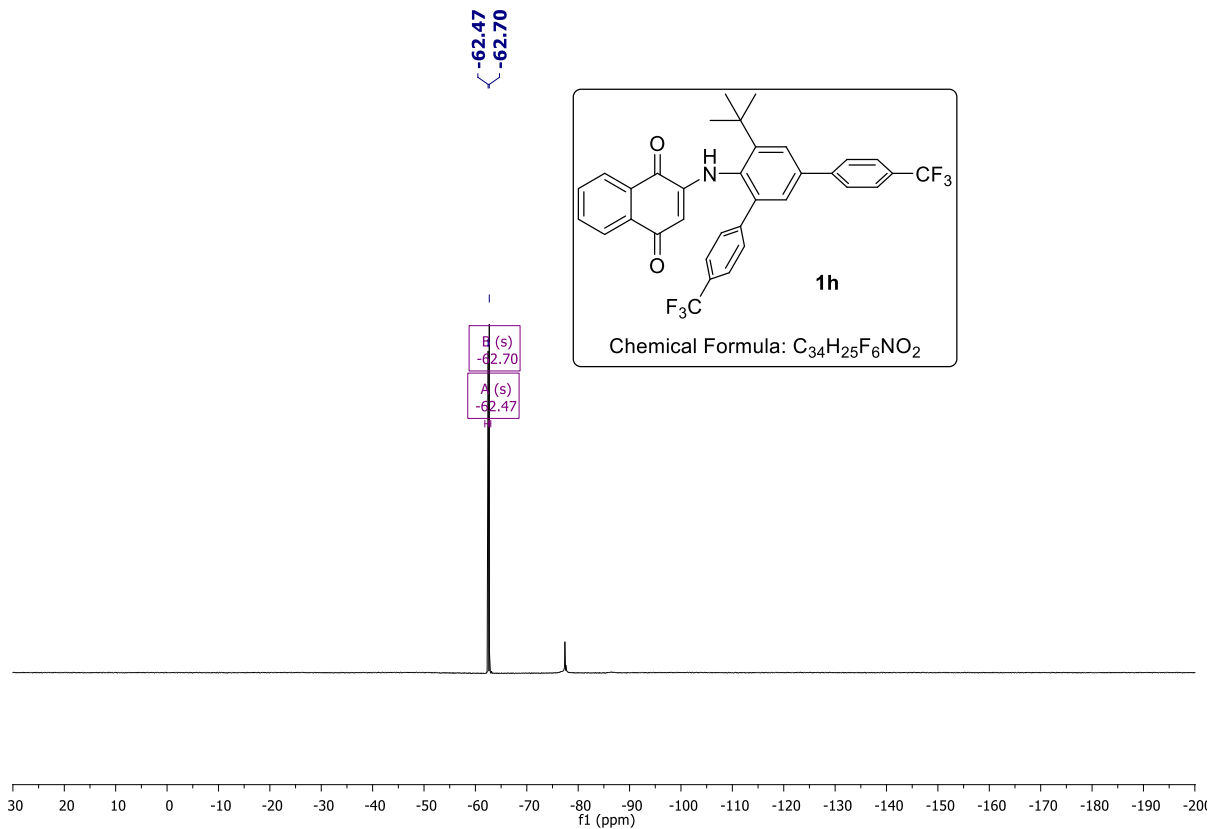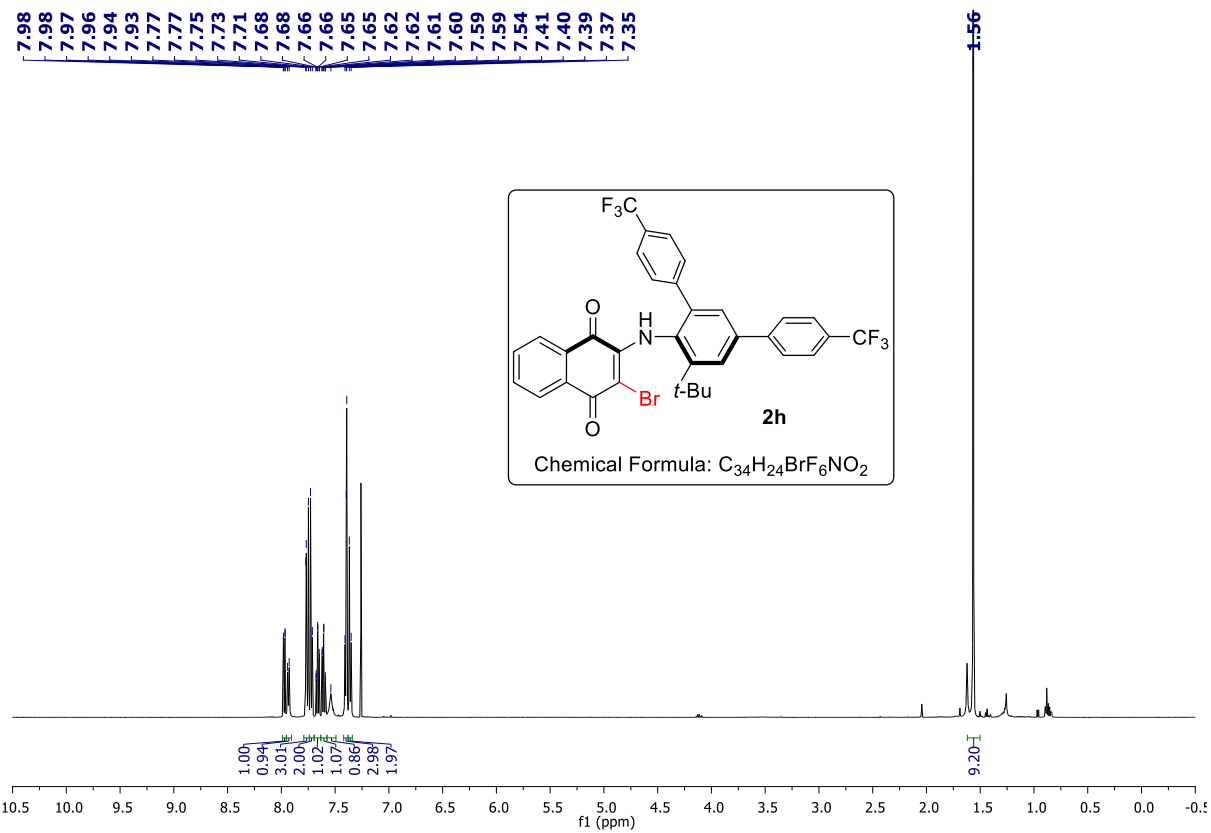

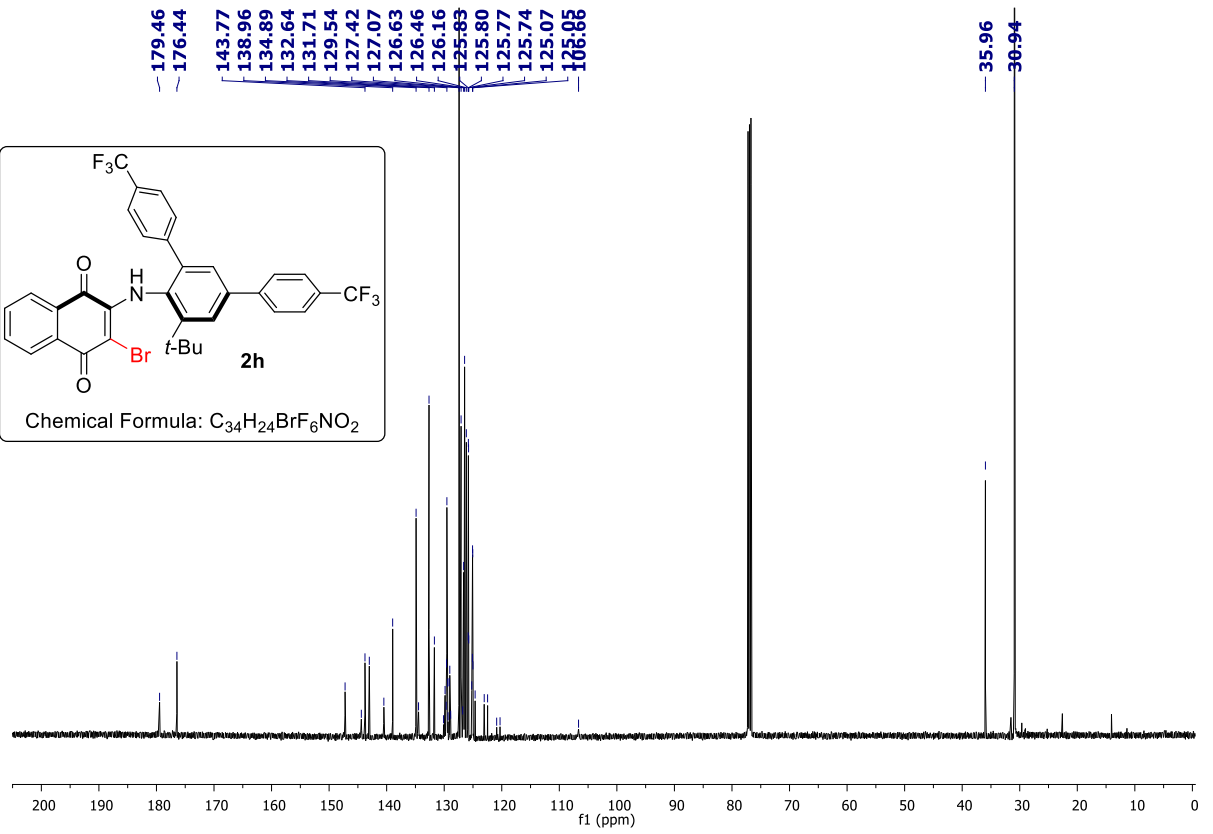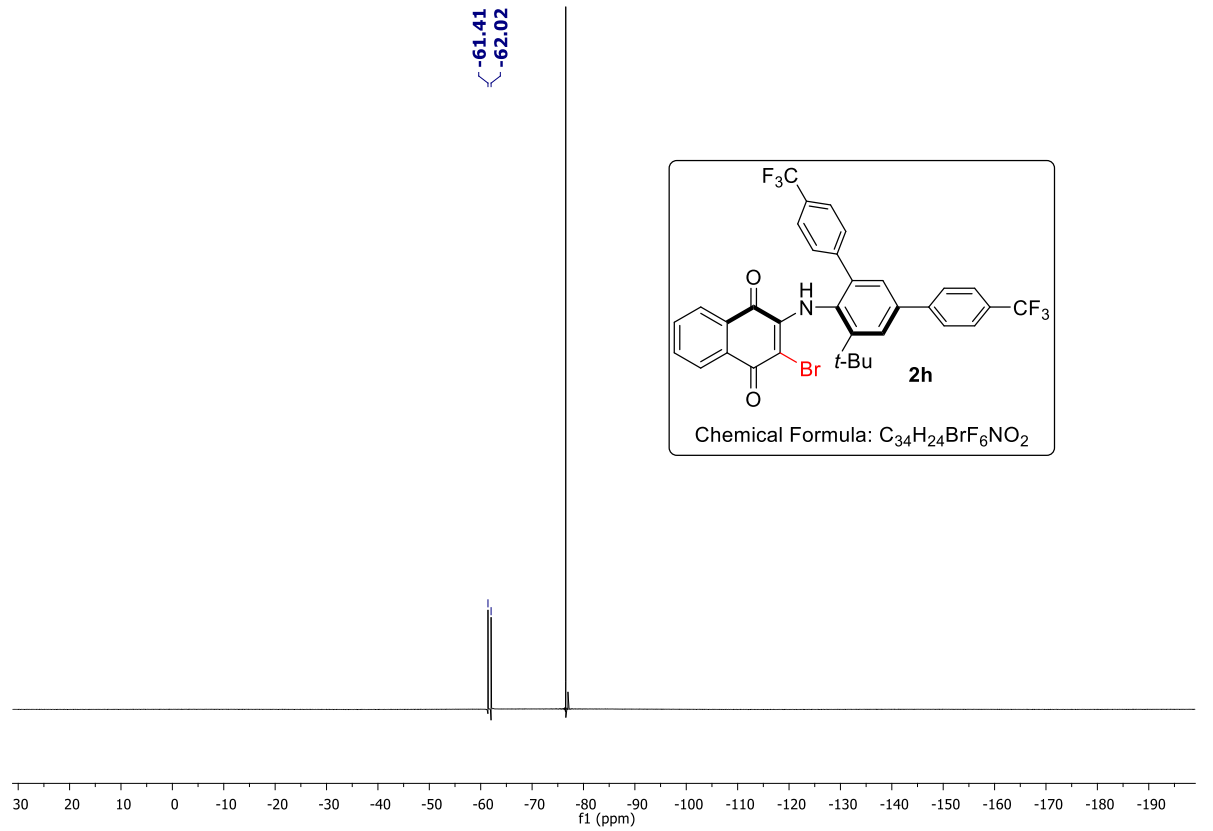

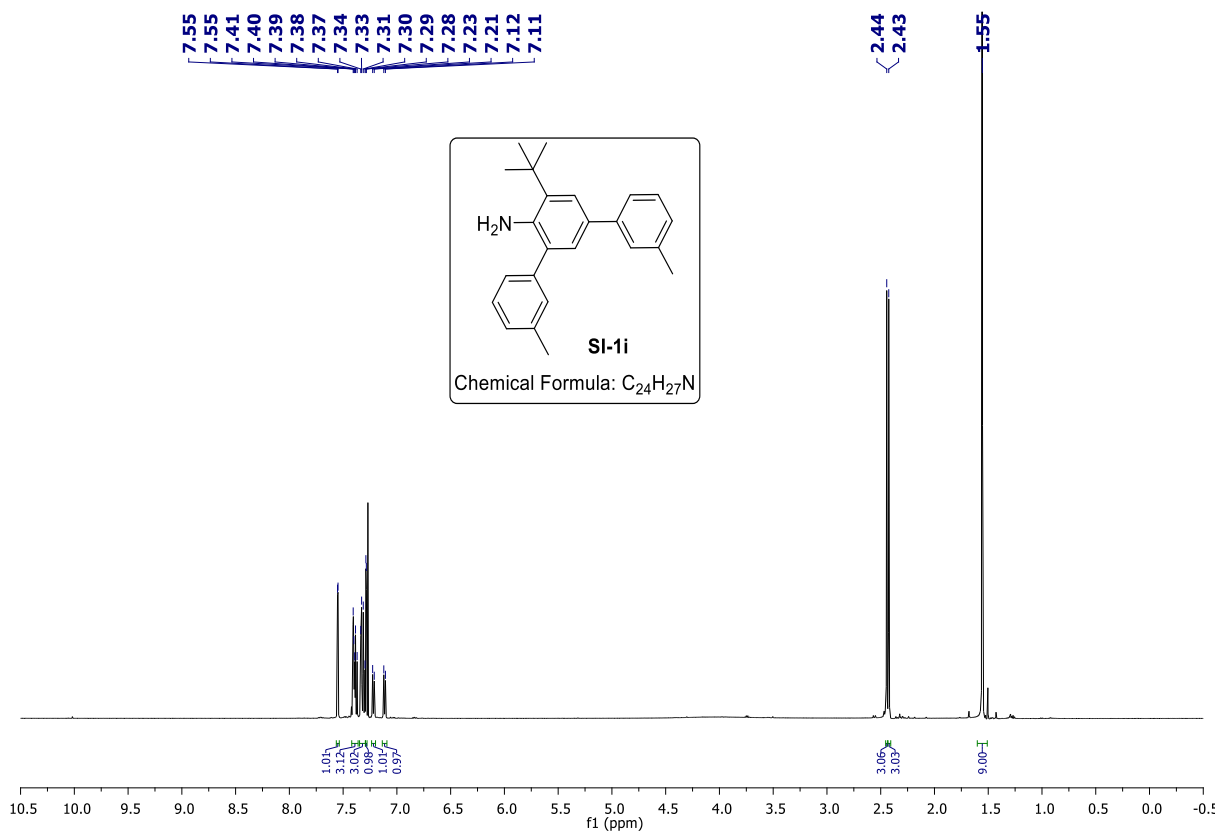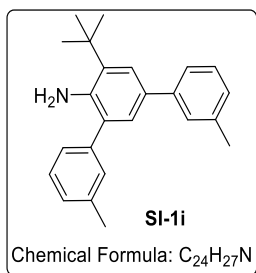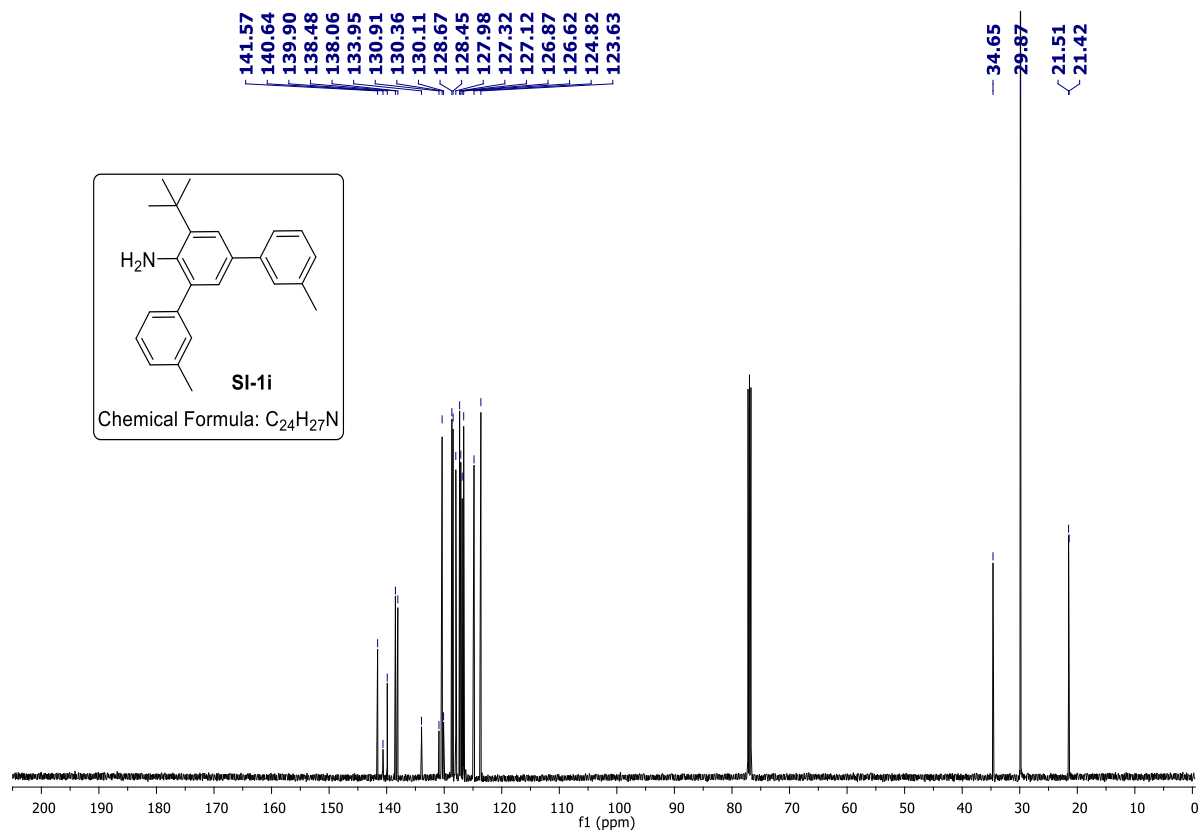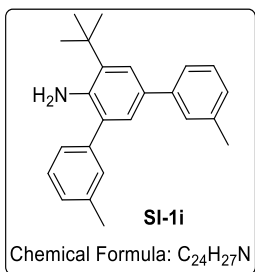



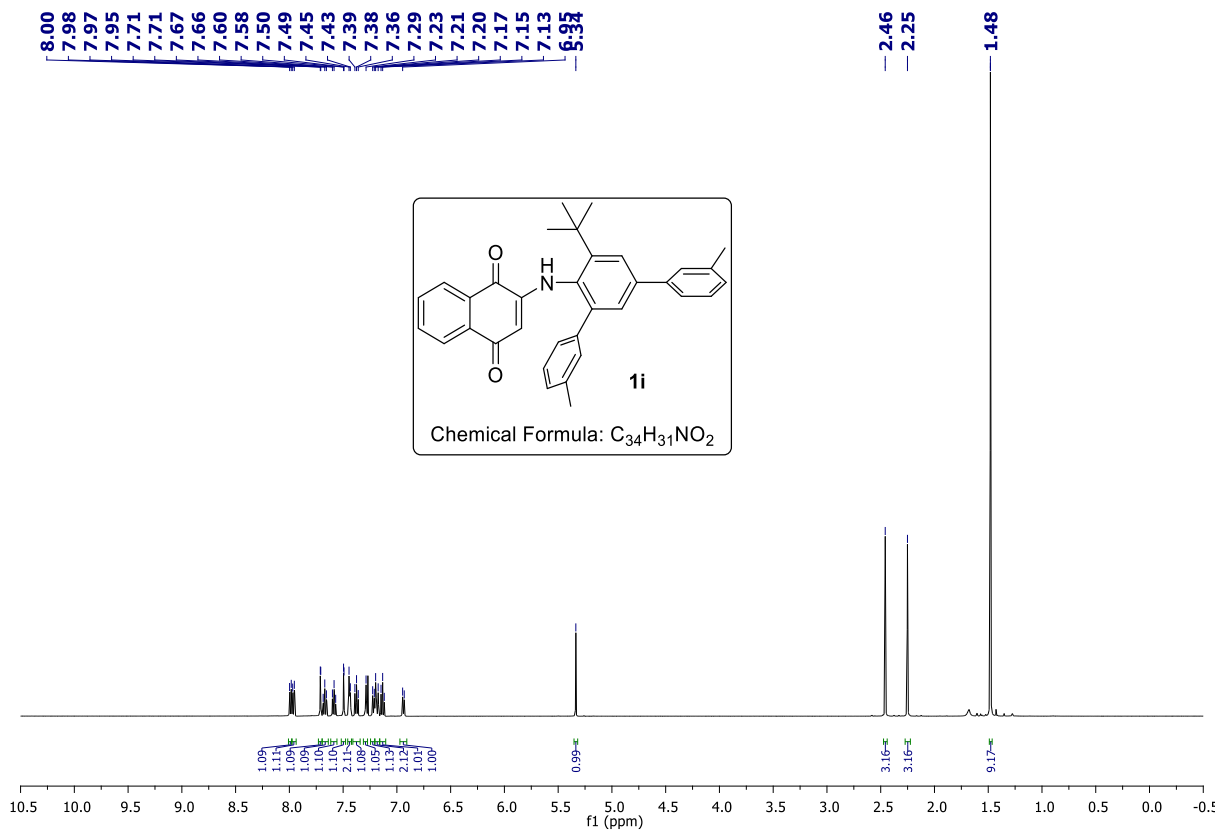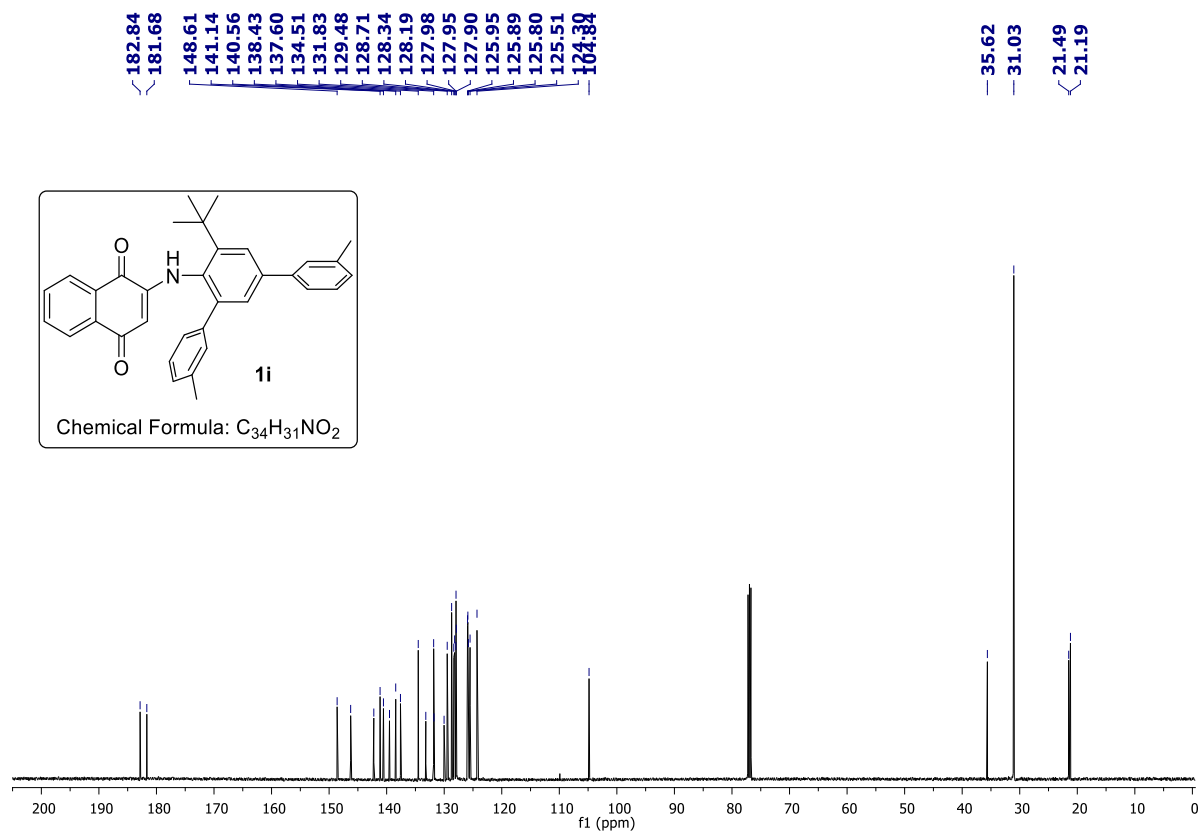

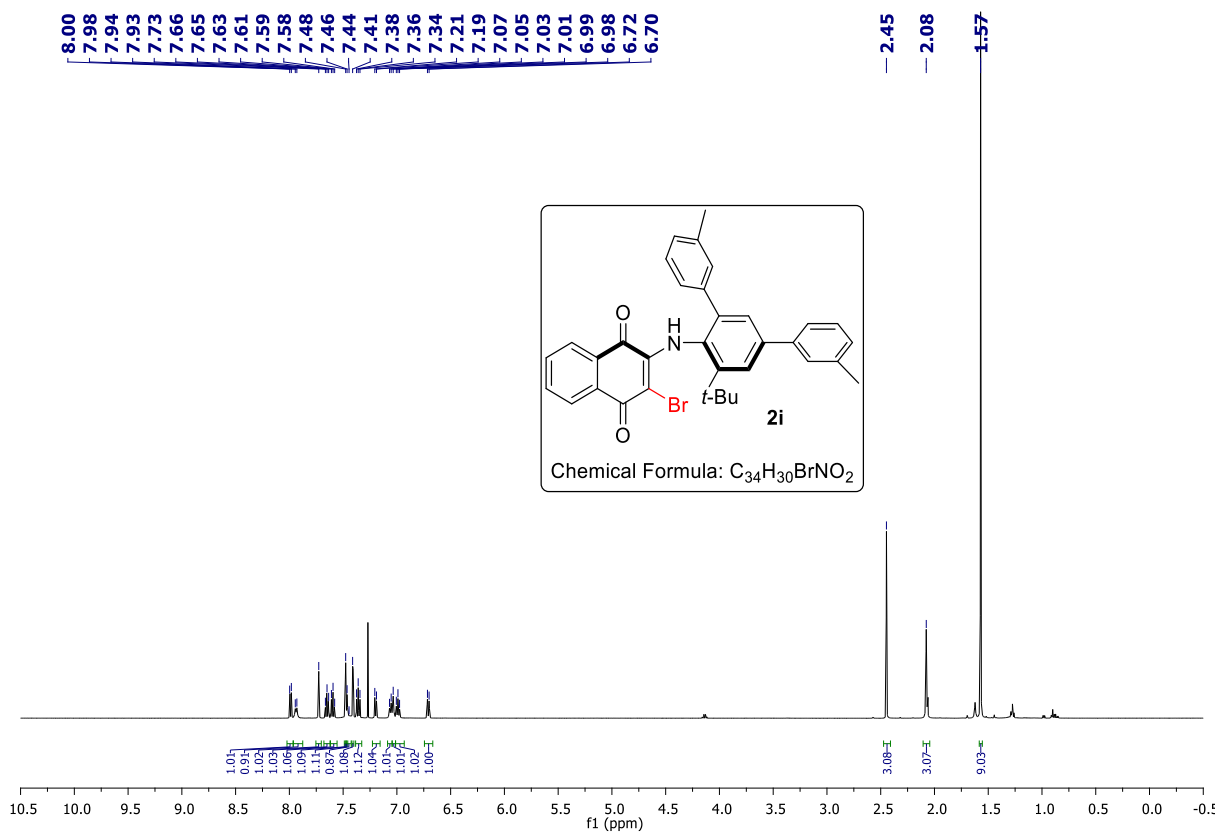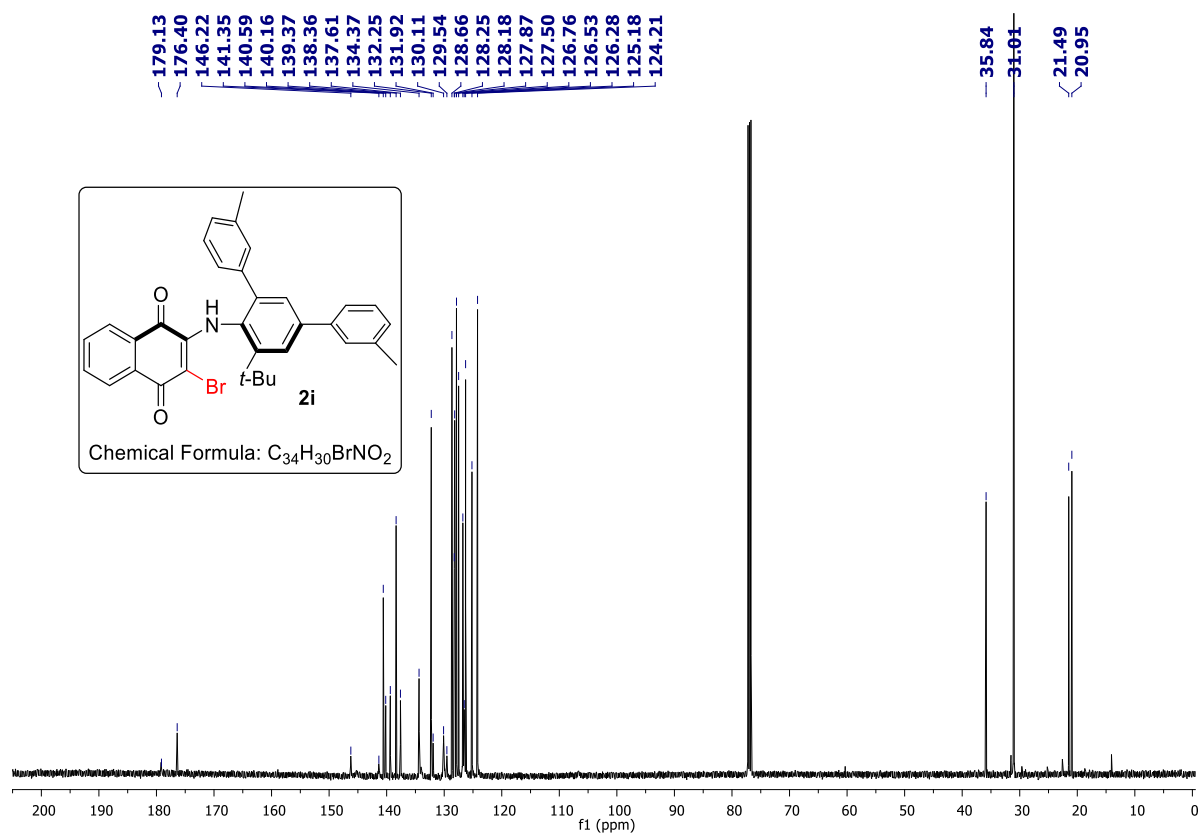

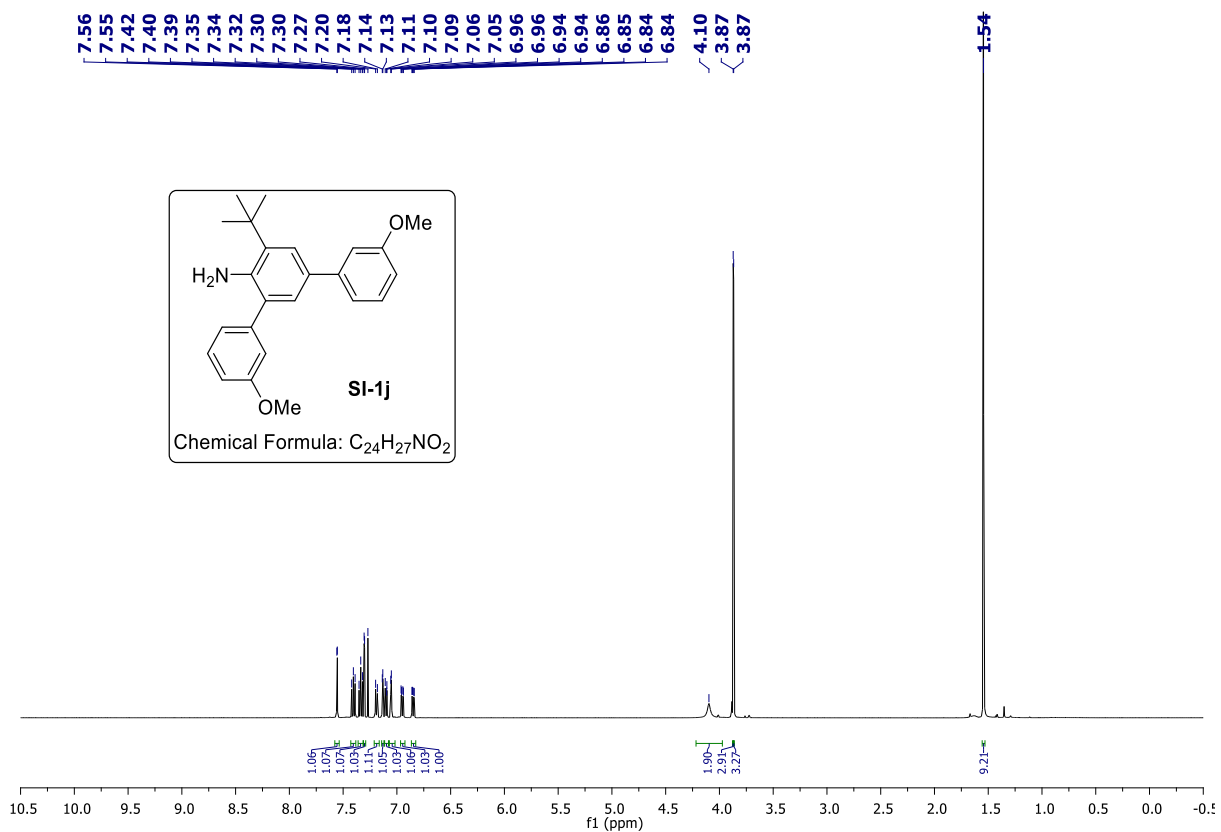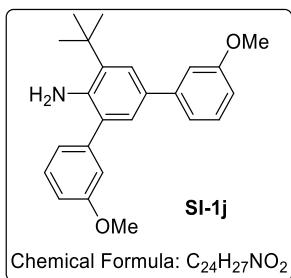

- 159.89
- 159.80
- 143.14
- 141.39
- 141.38
- 133.64
- 130.20
- 129.79
- 129.50
- 129.45
- 126.96
- 124.95
- 121.88
- 119.07
- 114.97
- 113.04
- 112.22
- 111.46

- 55.23
- 55.19

- 34.62
- 29.75

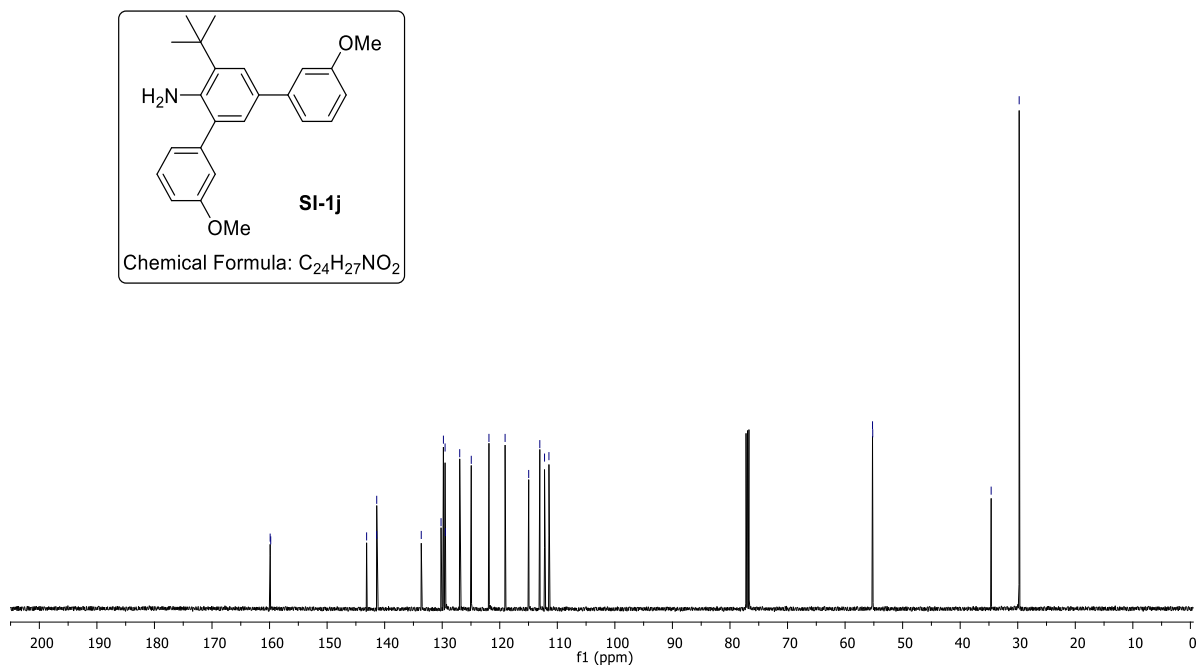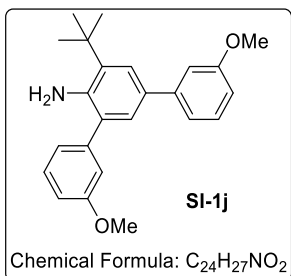

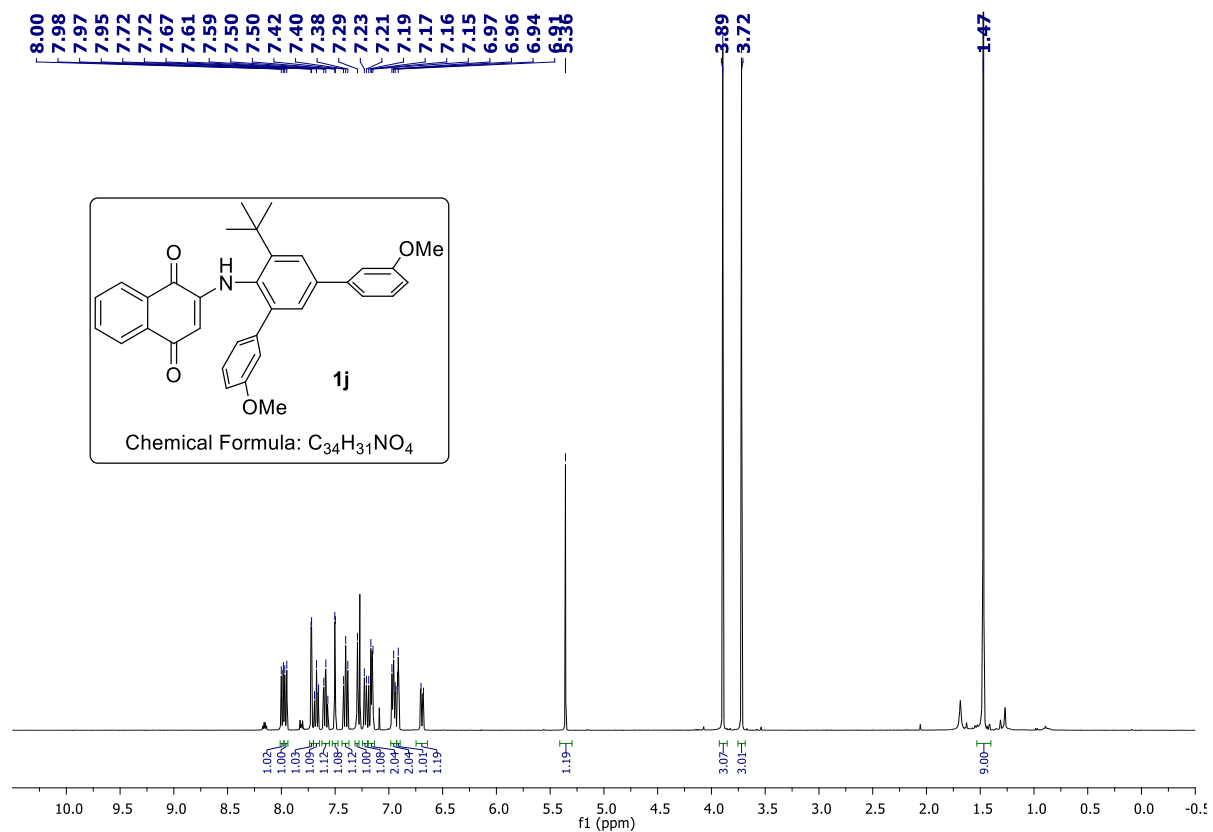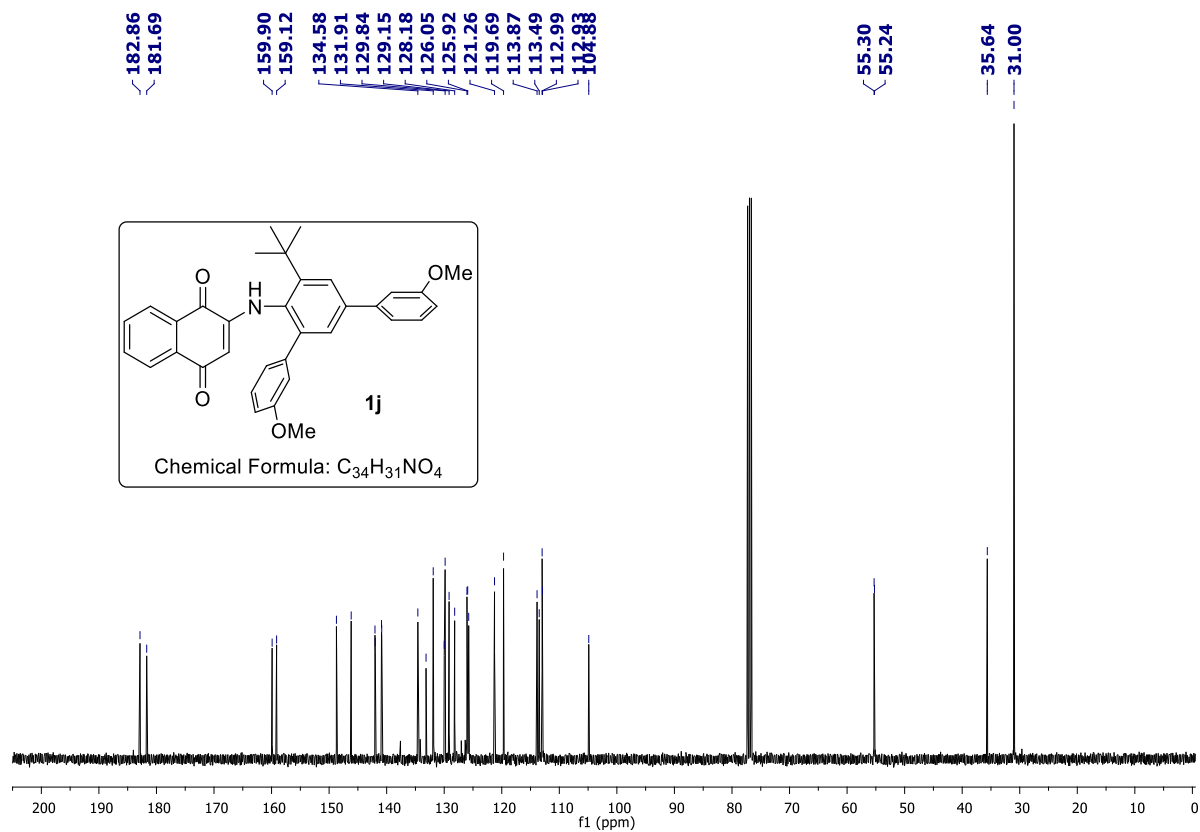

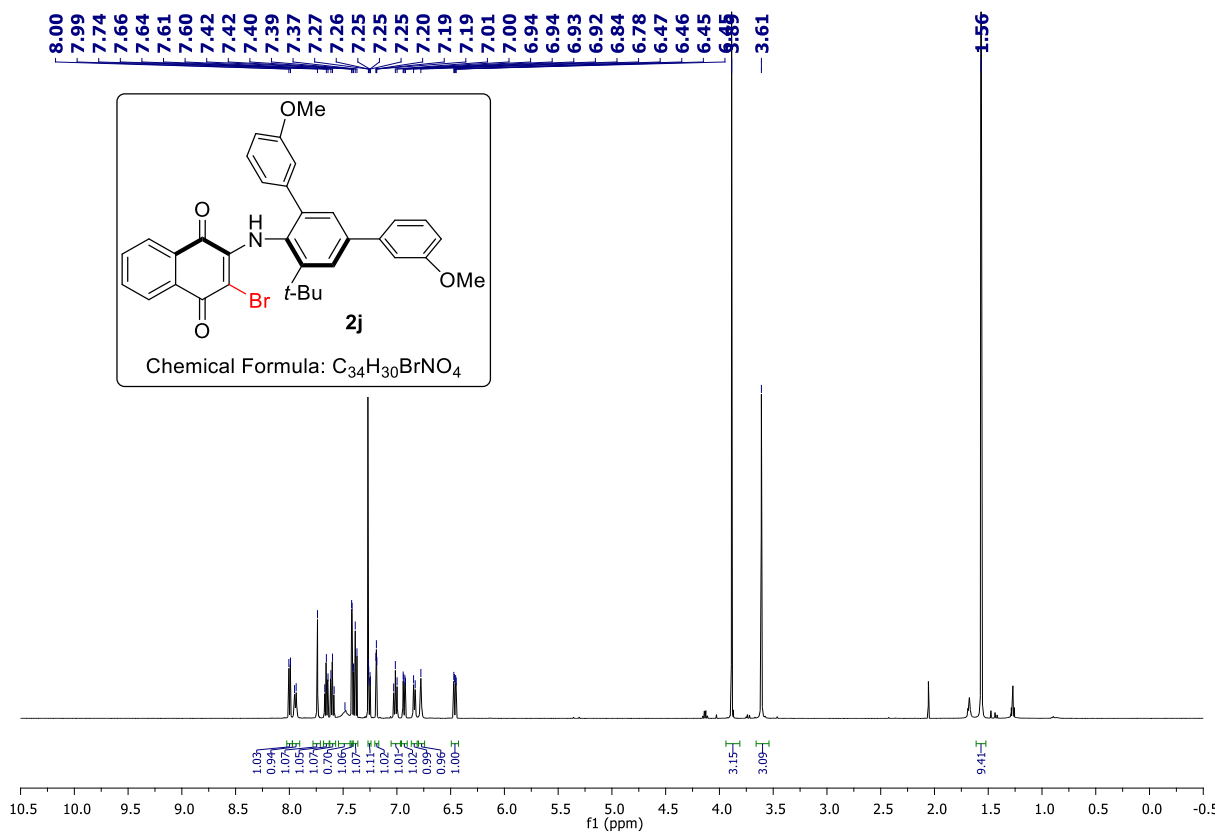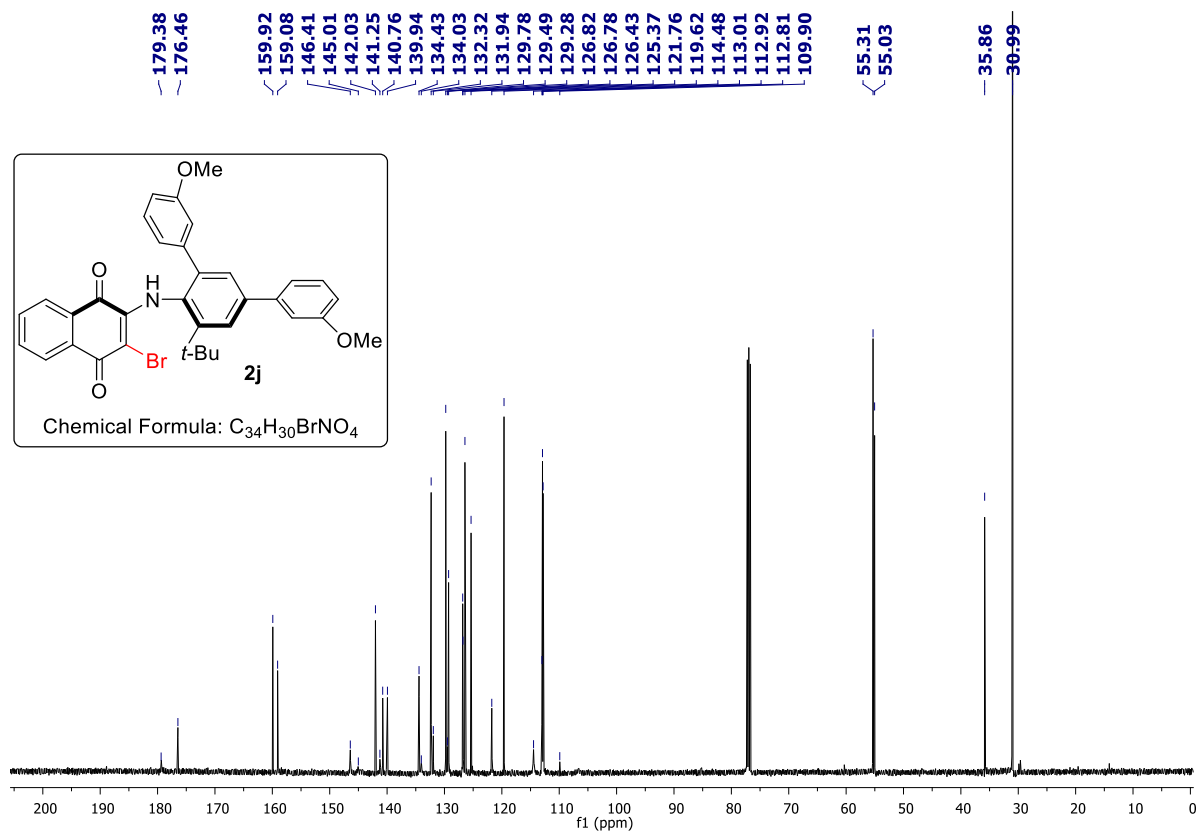

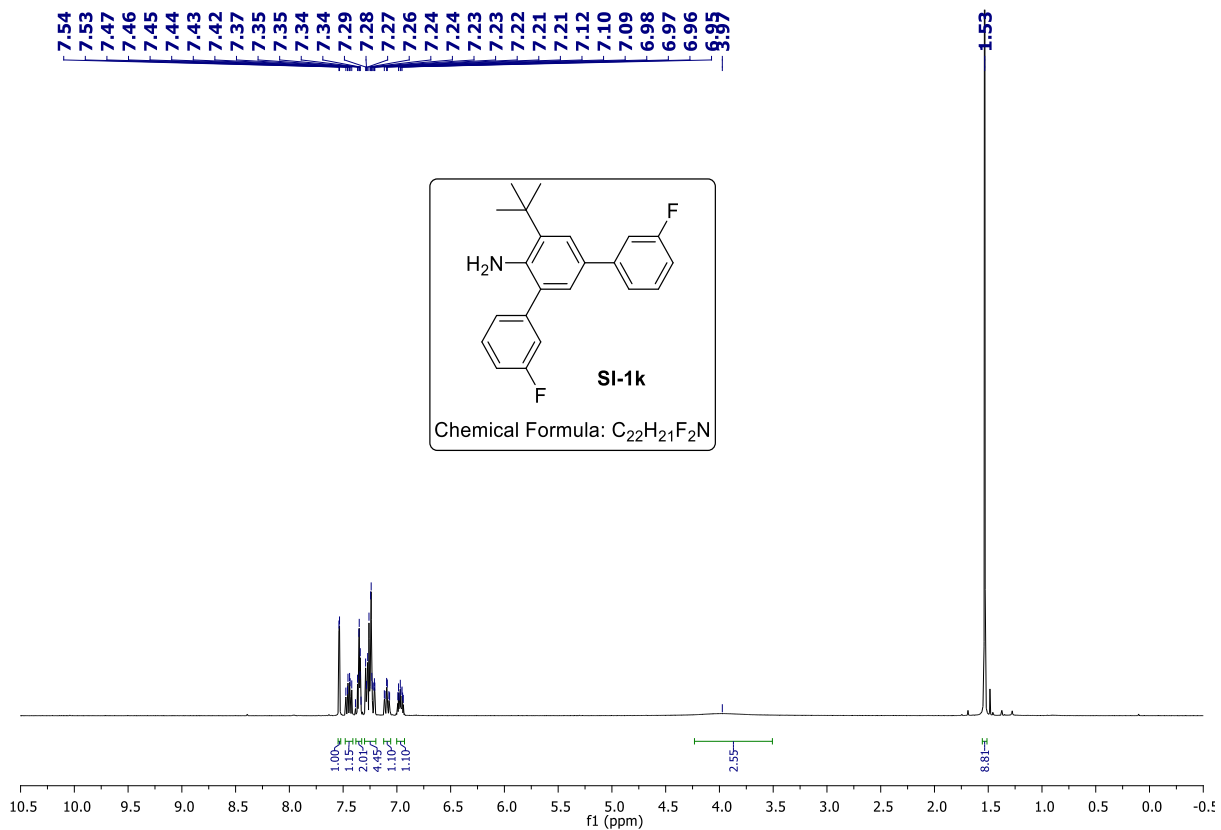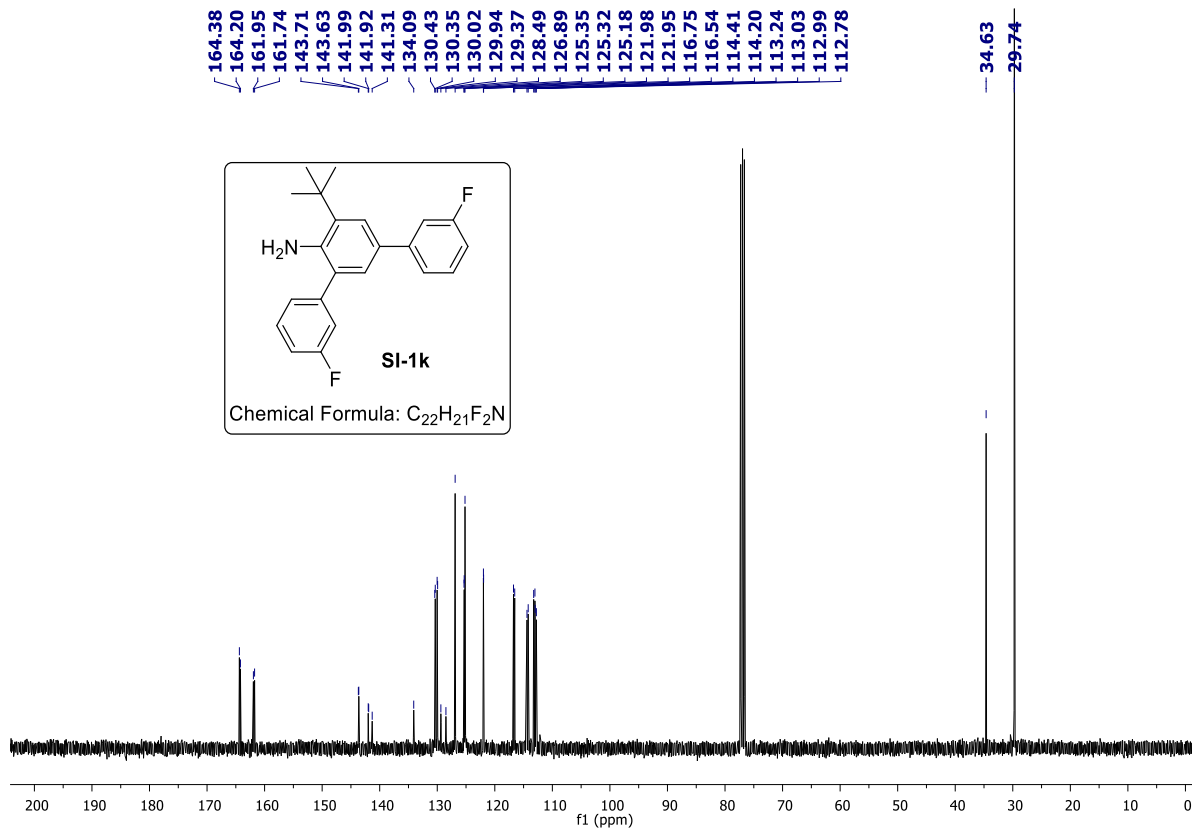

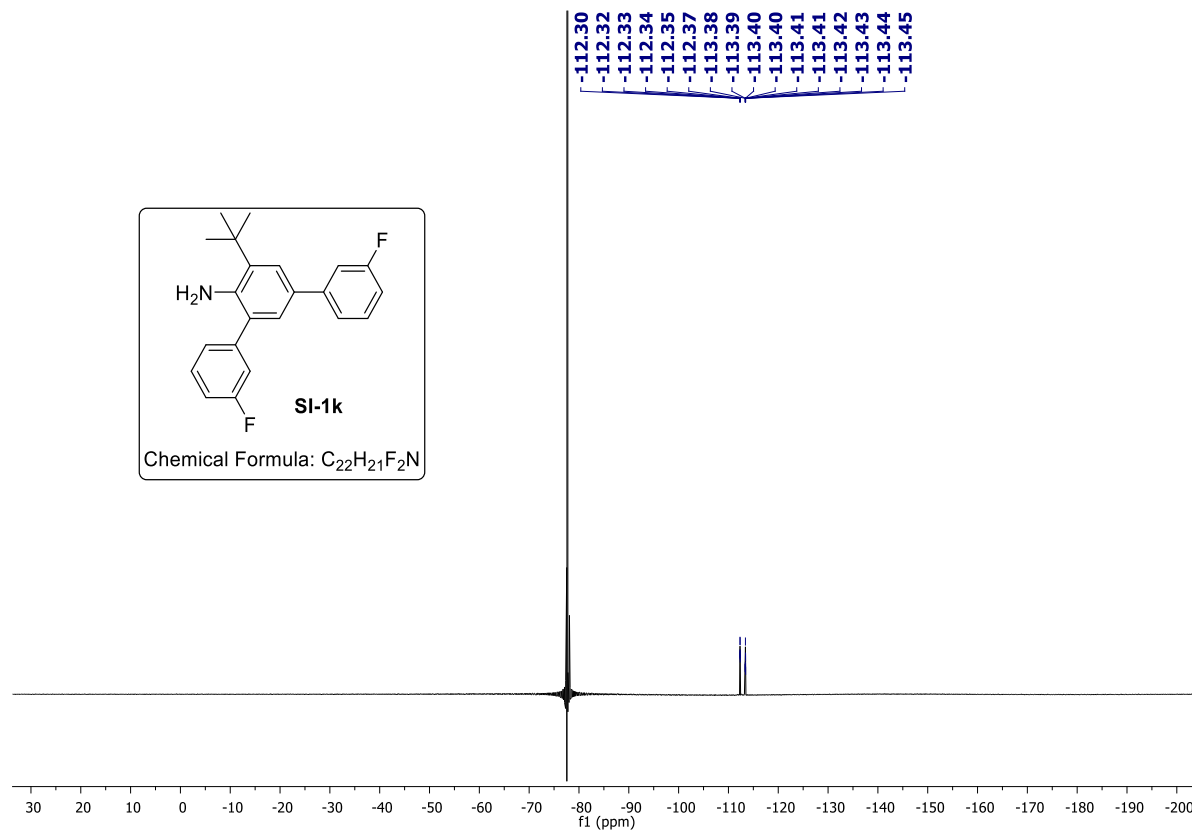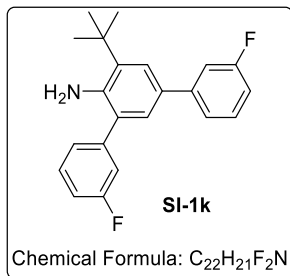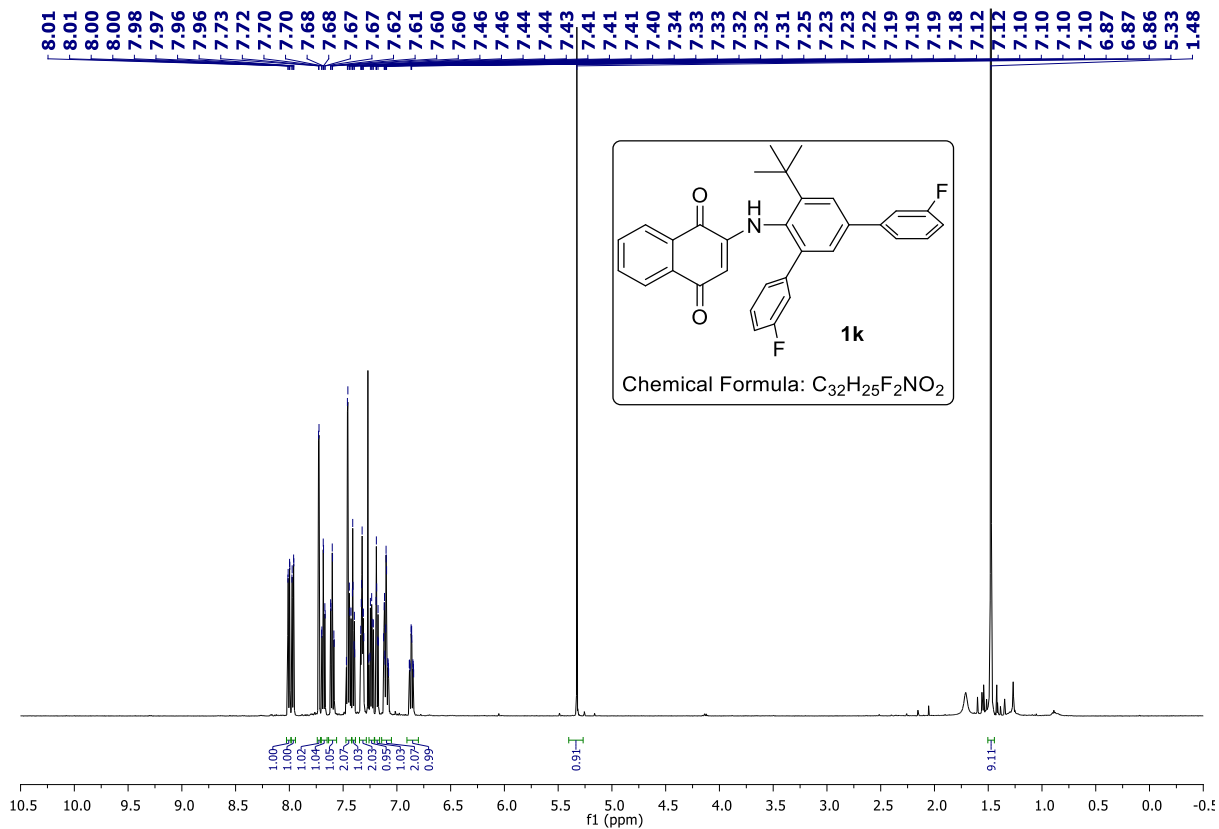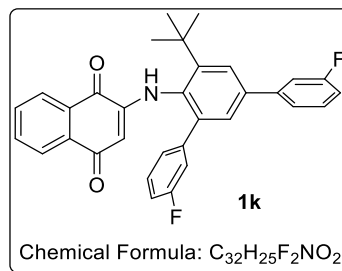

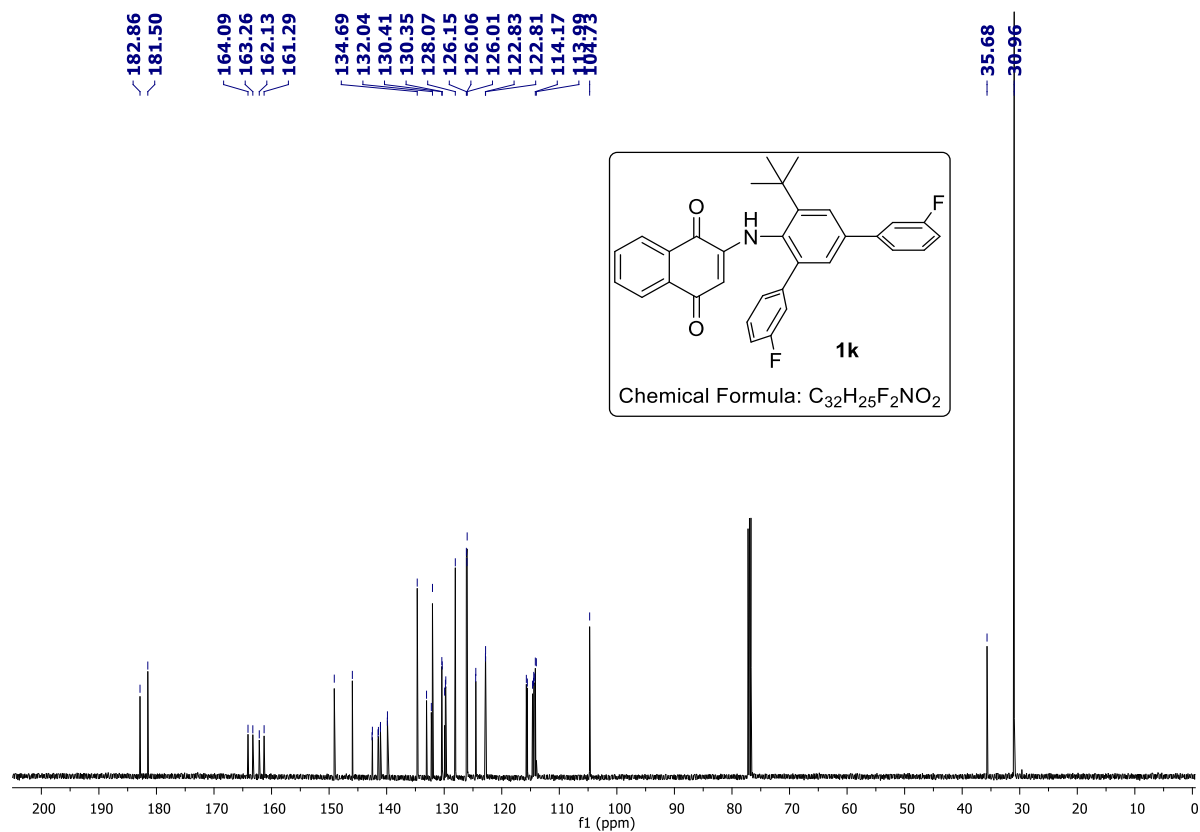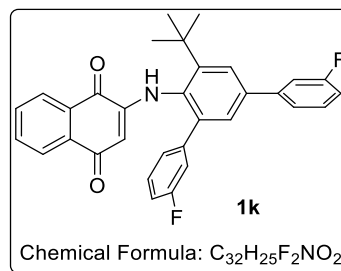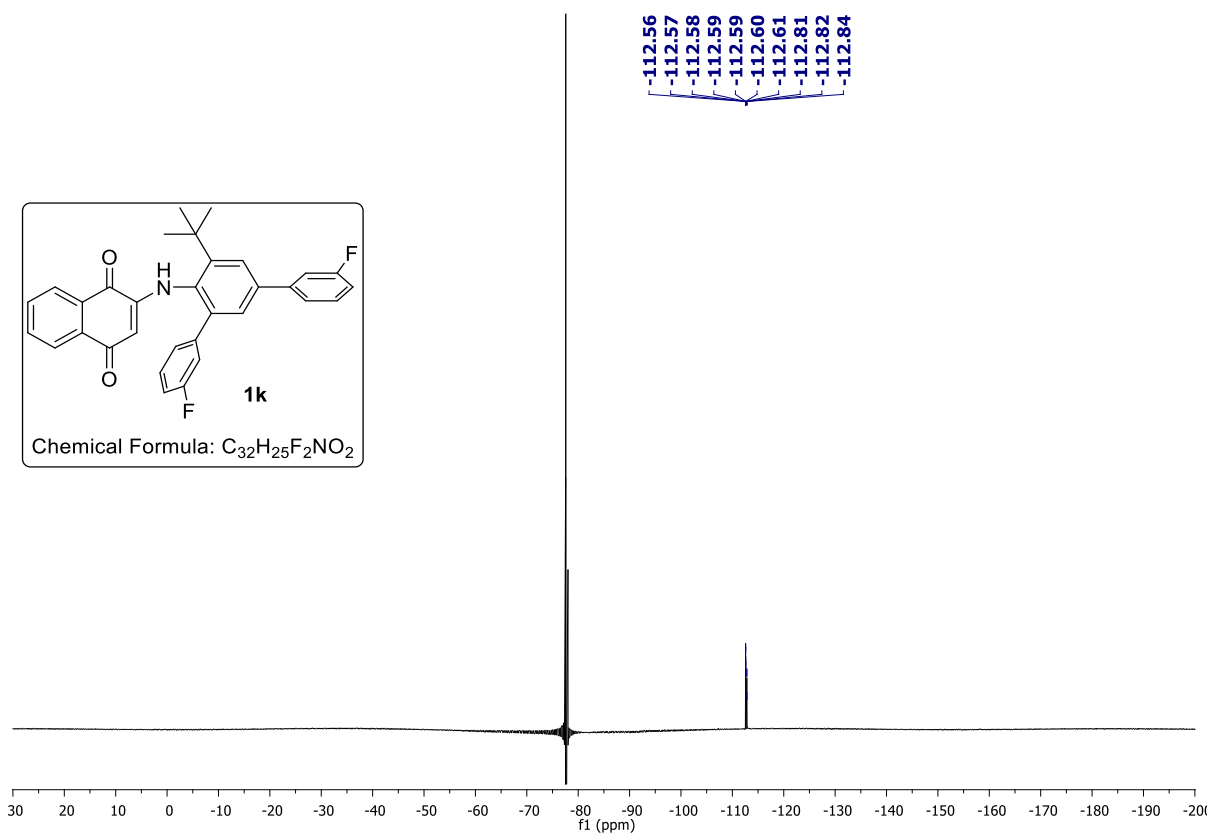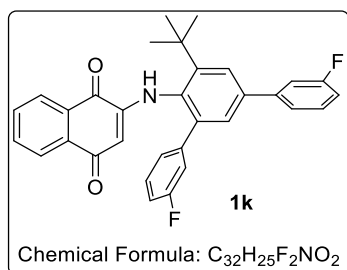



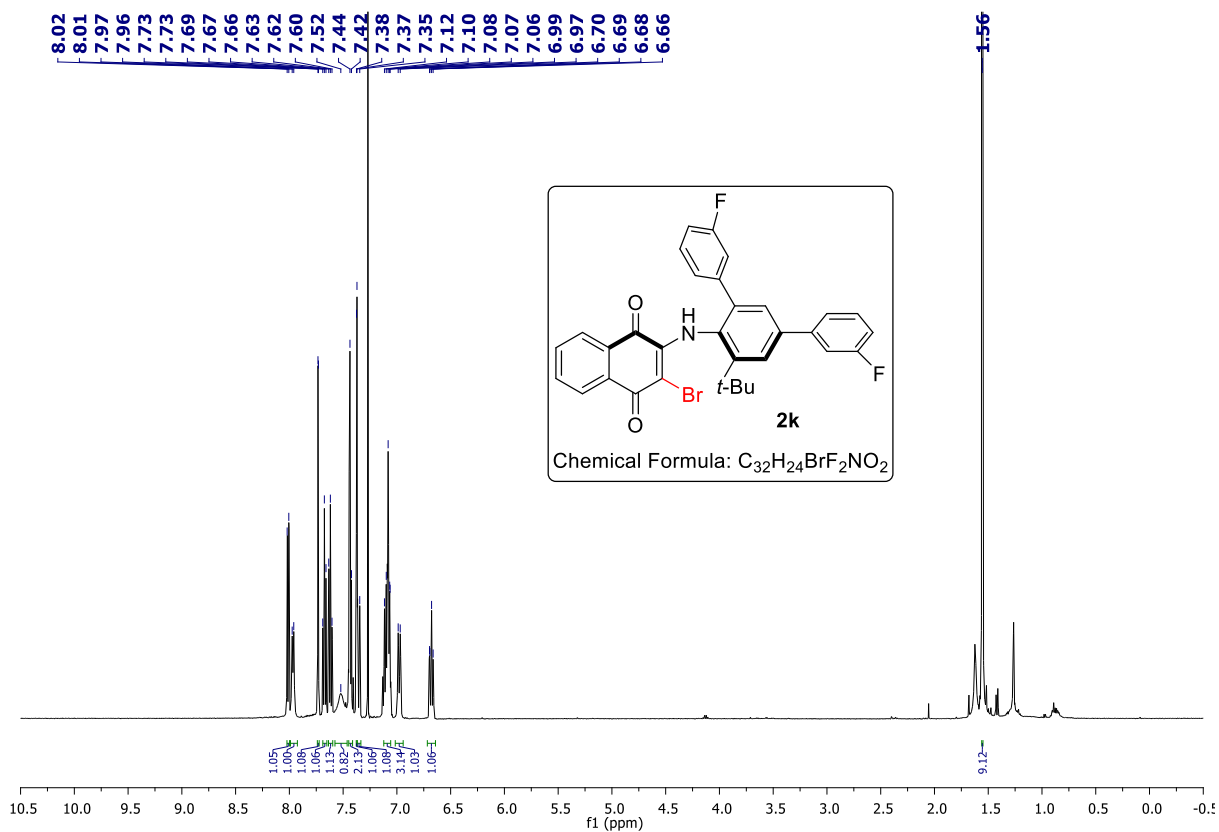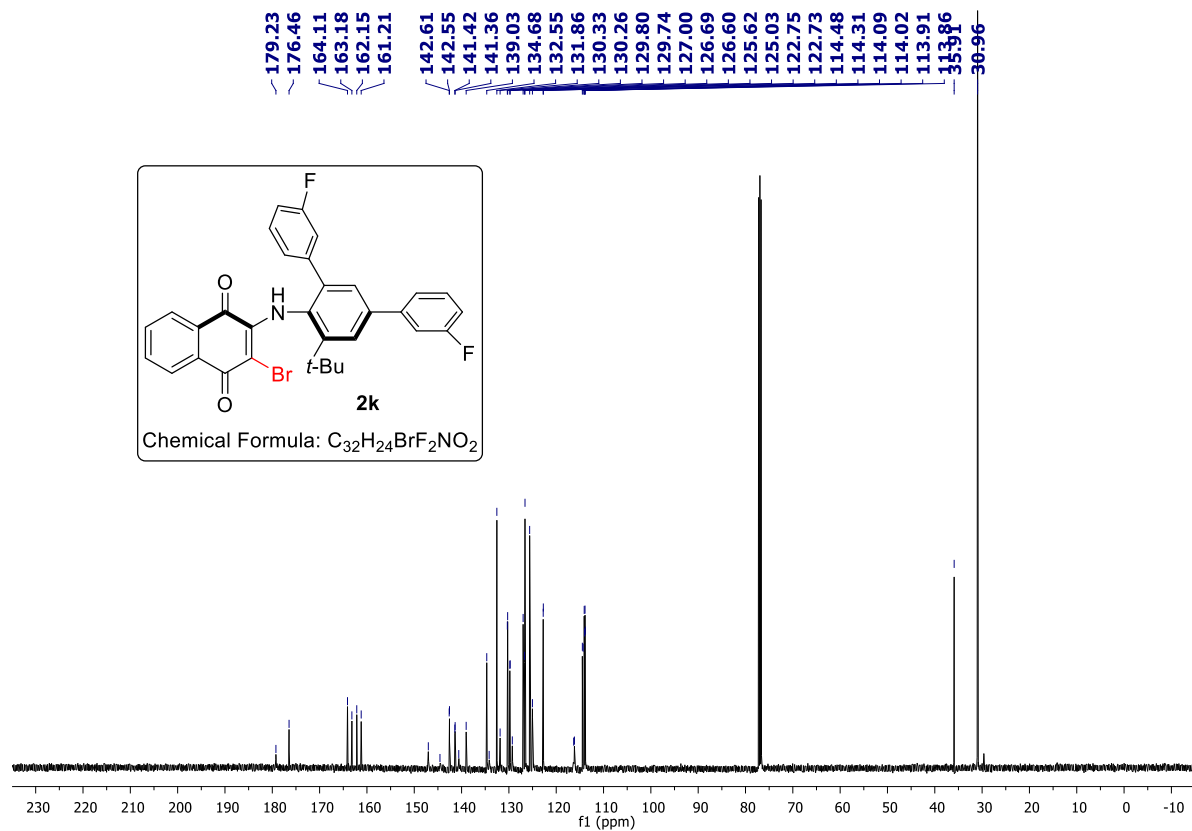

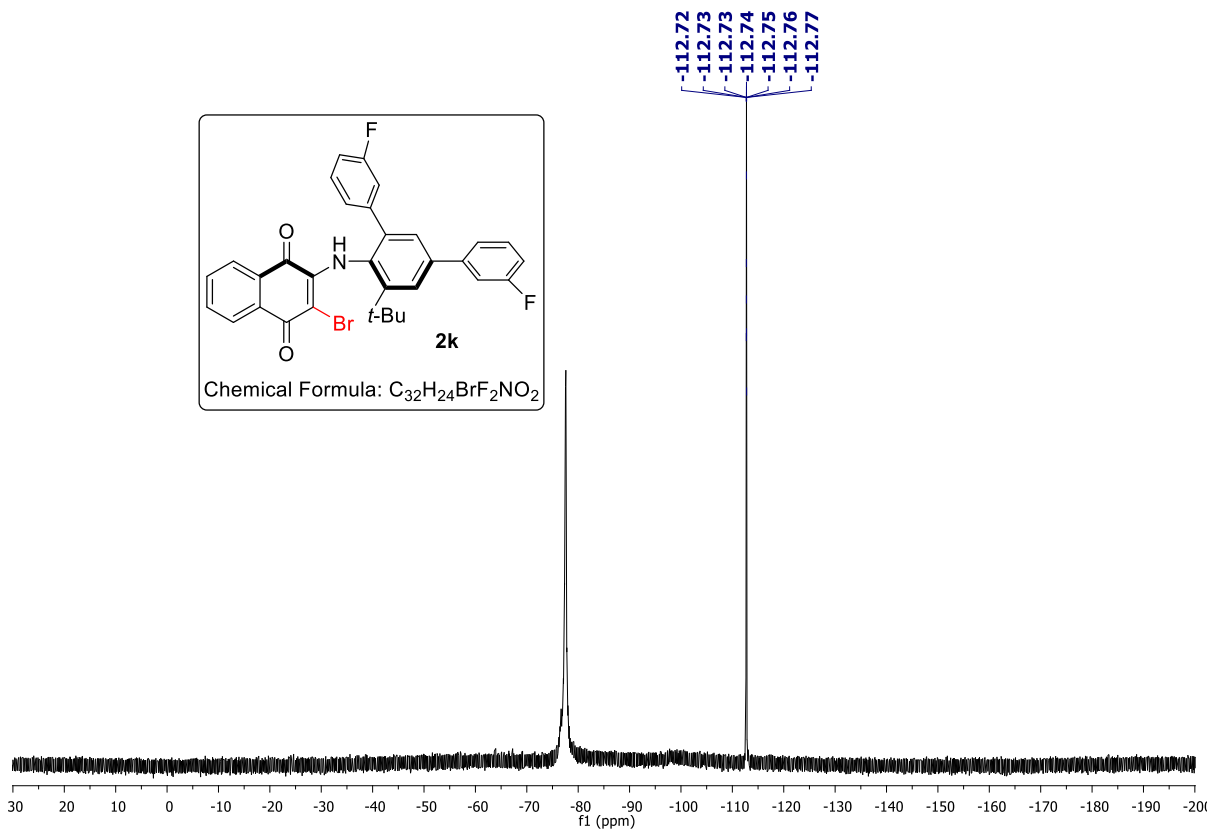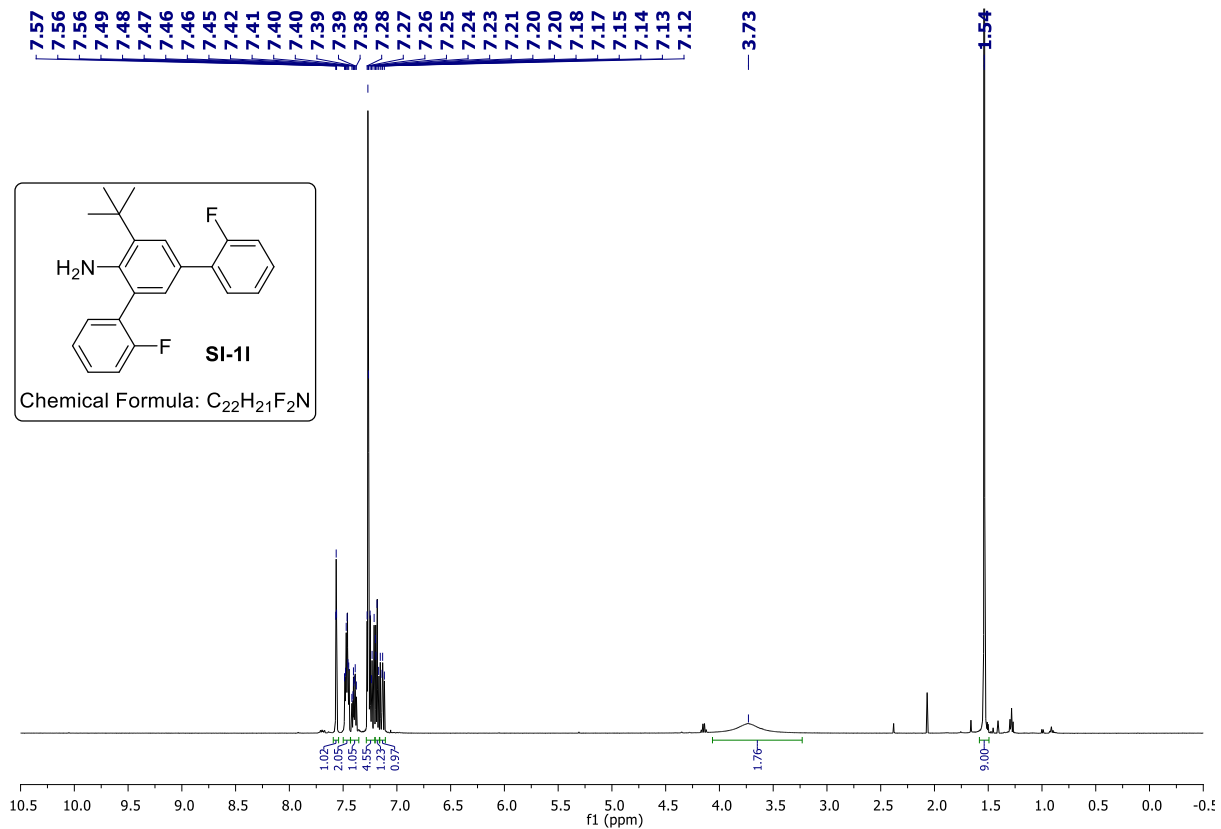

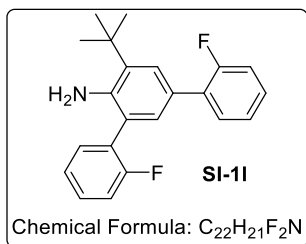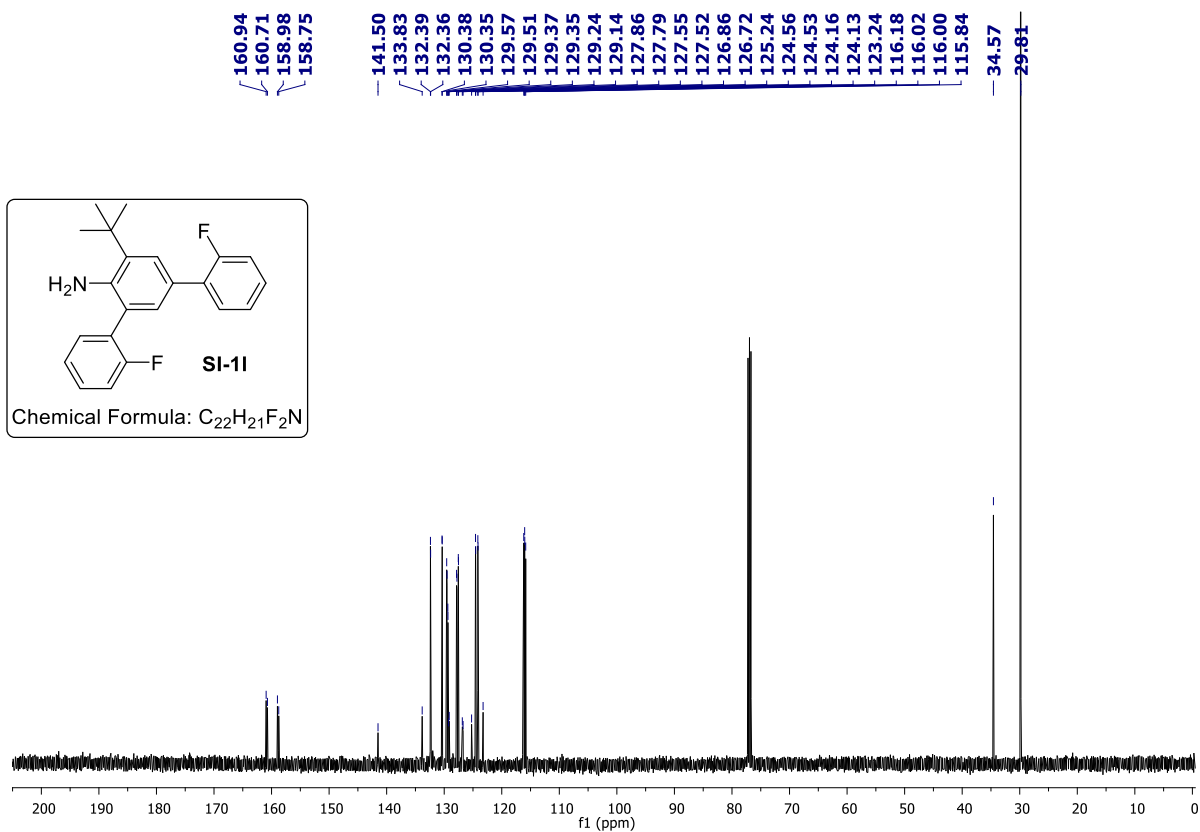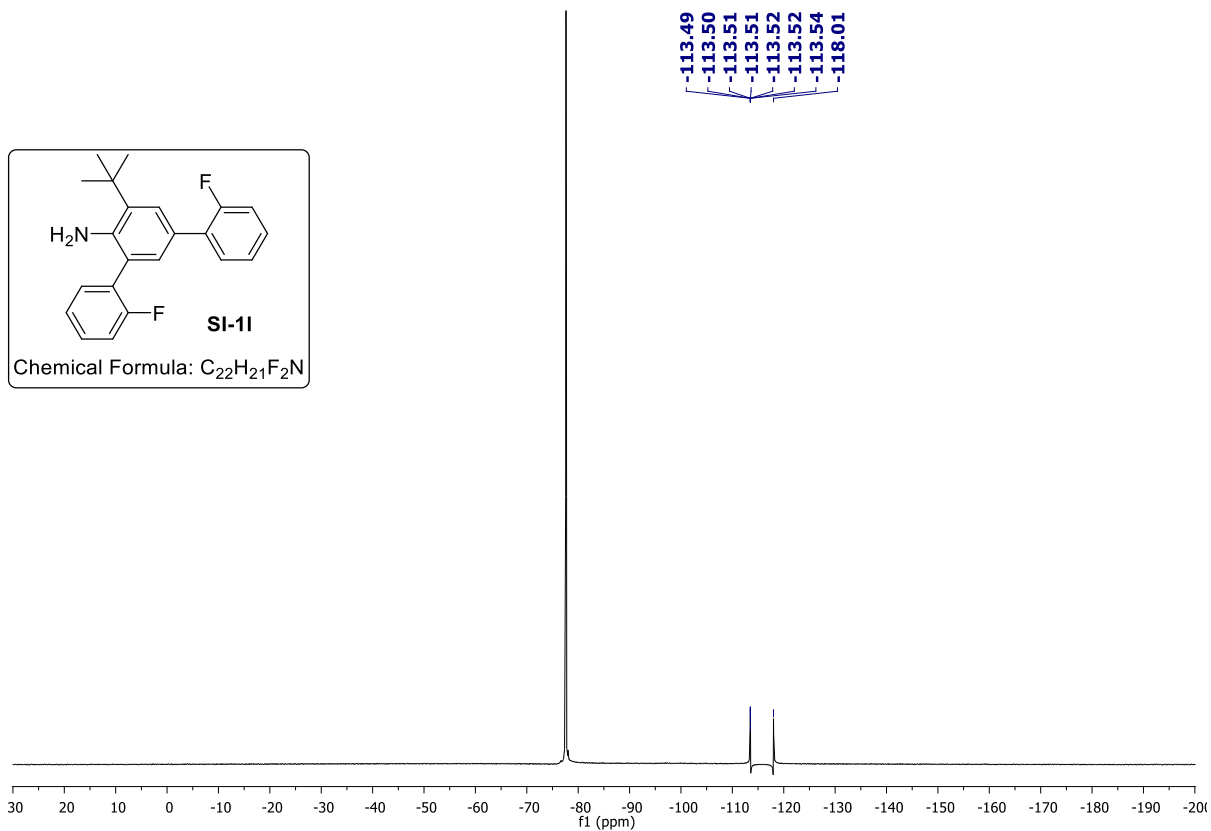

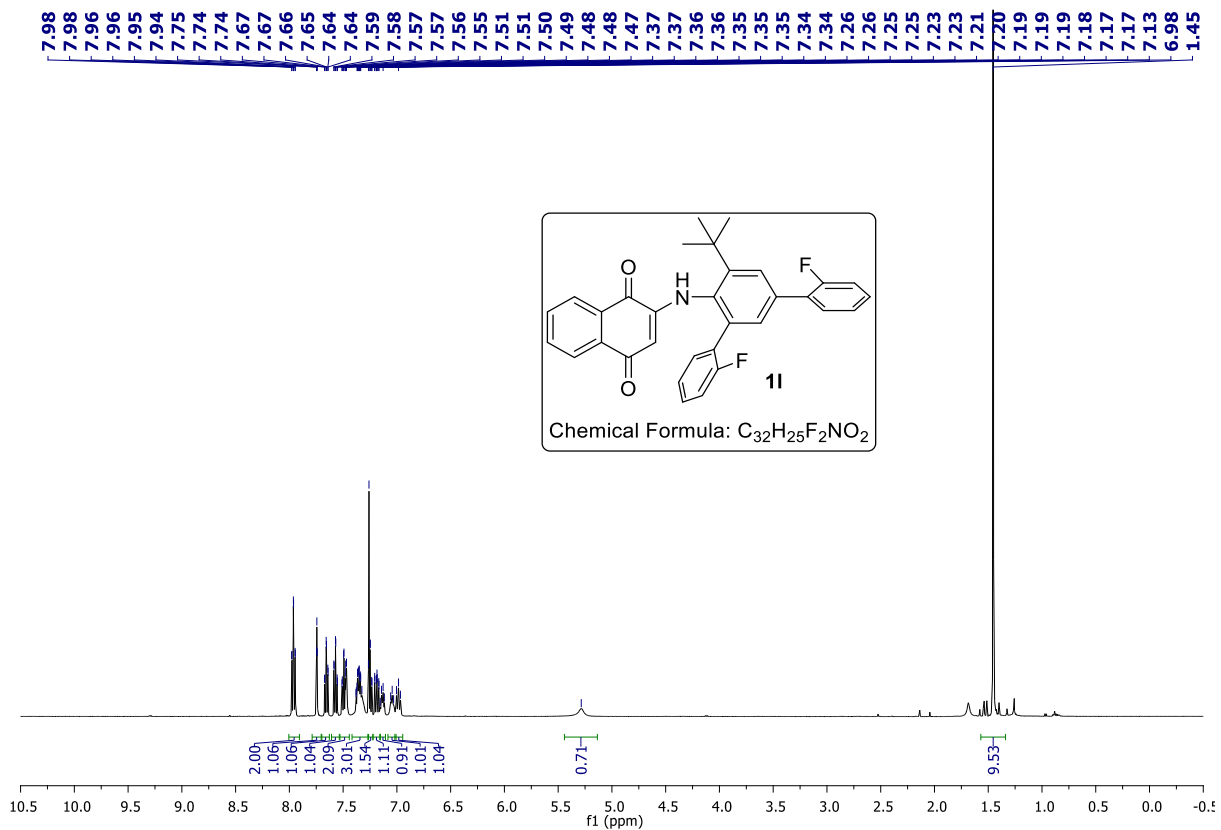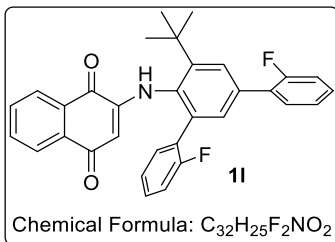

- 182.92
- 181.33
- 160.66
- 158.69
- 148.73
- 146.78
- 134.54
- 131.92
- 126.07
- 125.92
- 124.45
- 116.48
- 116.10
- 115.42
- 103.87
- 35.59
- 30.95

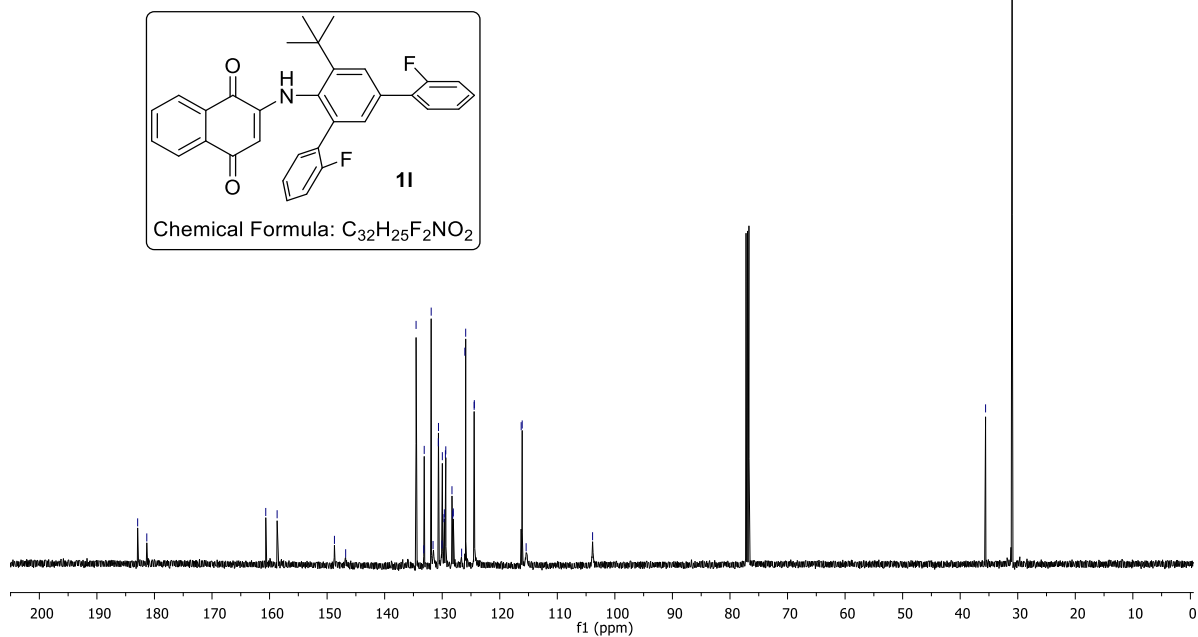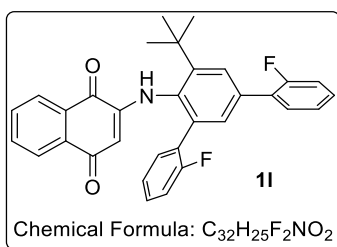

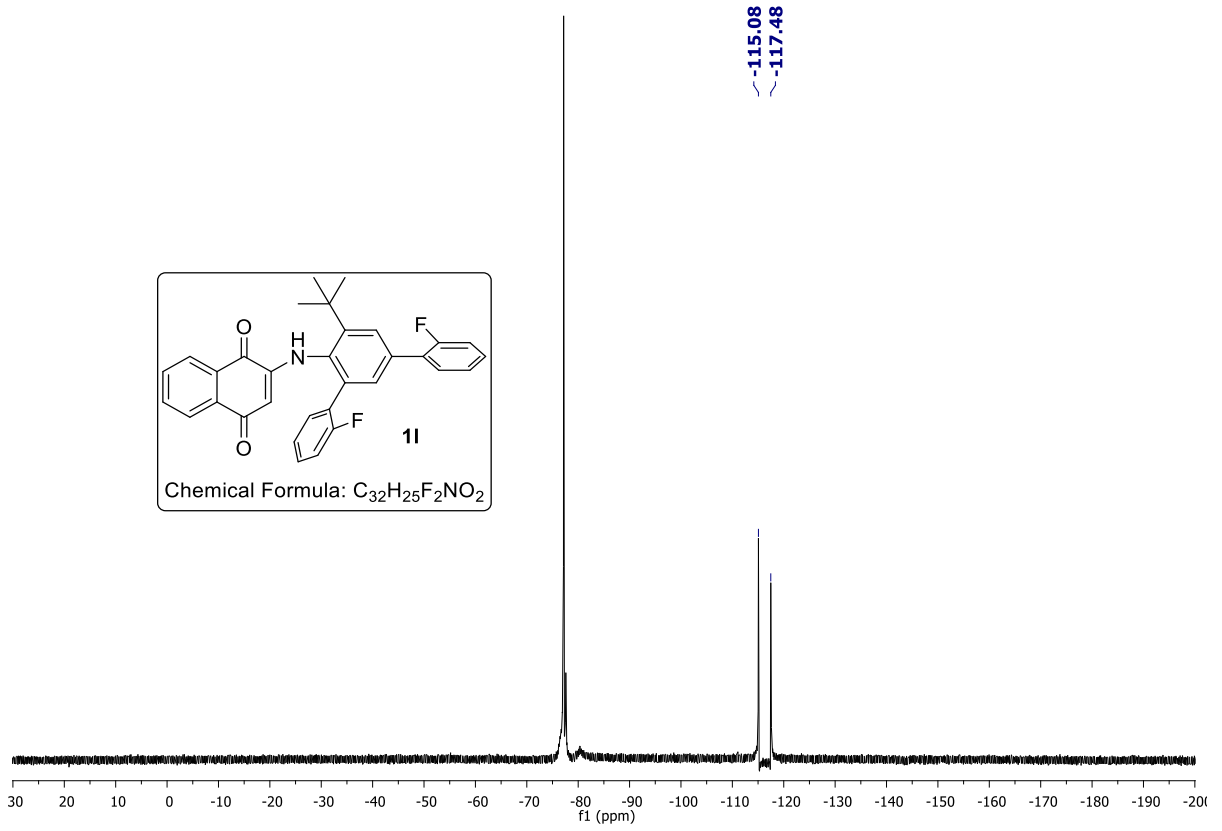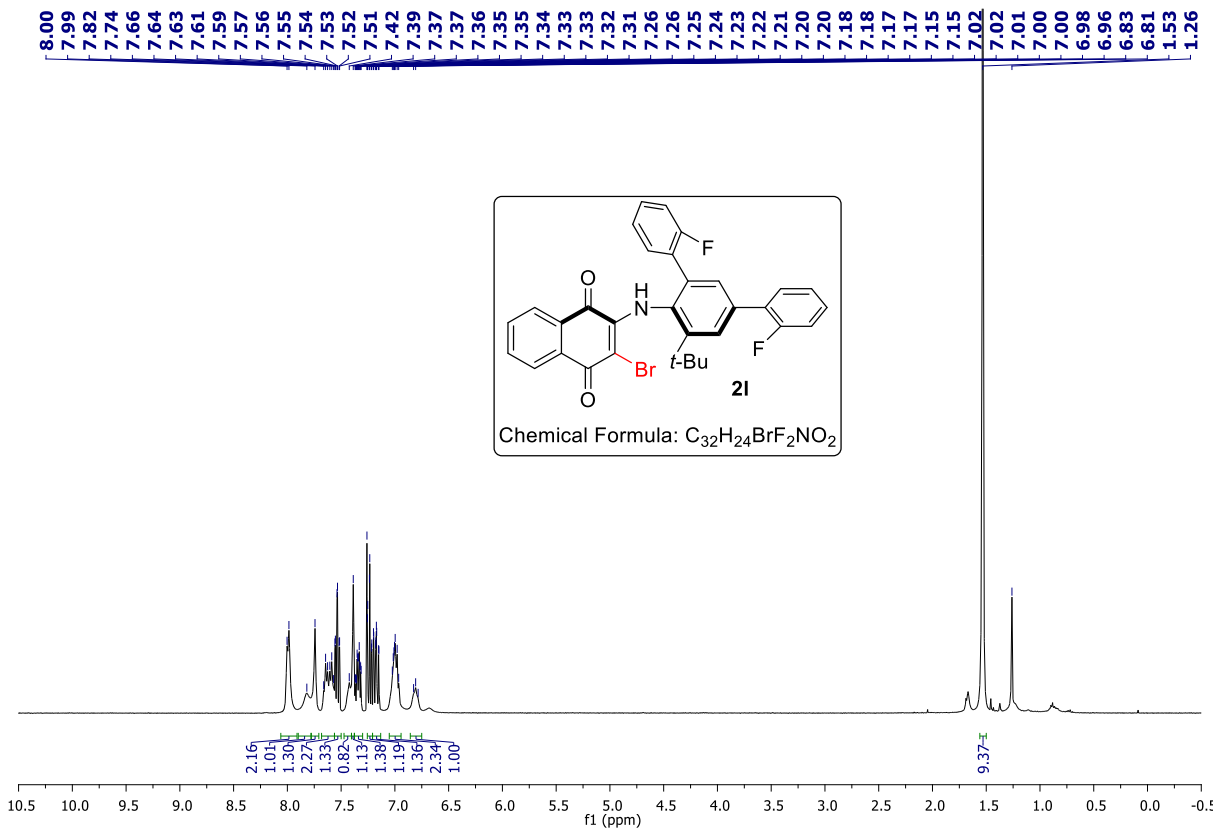

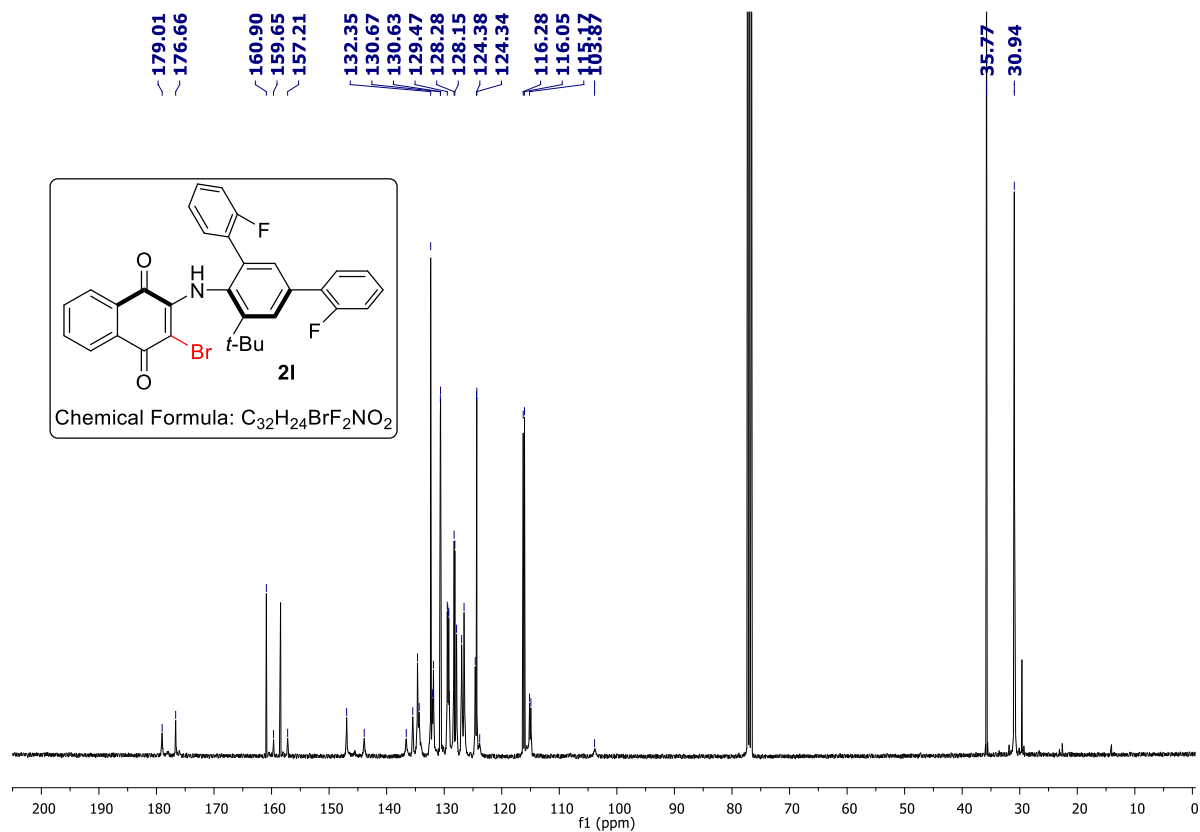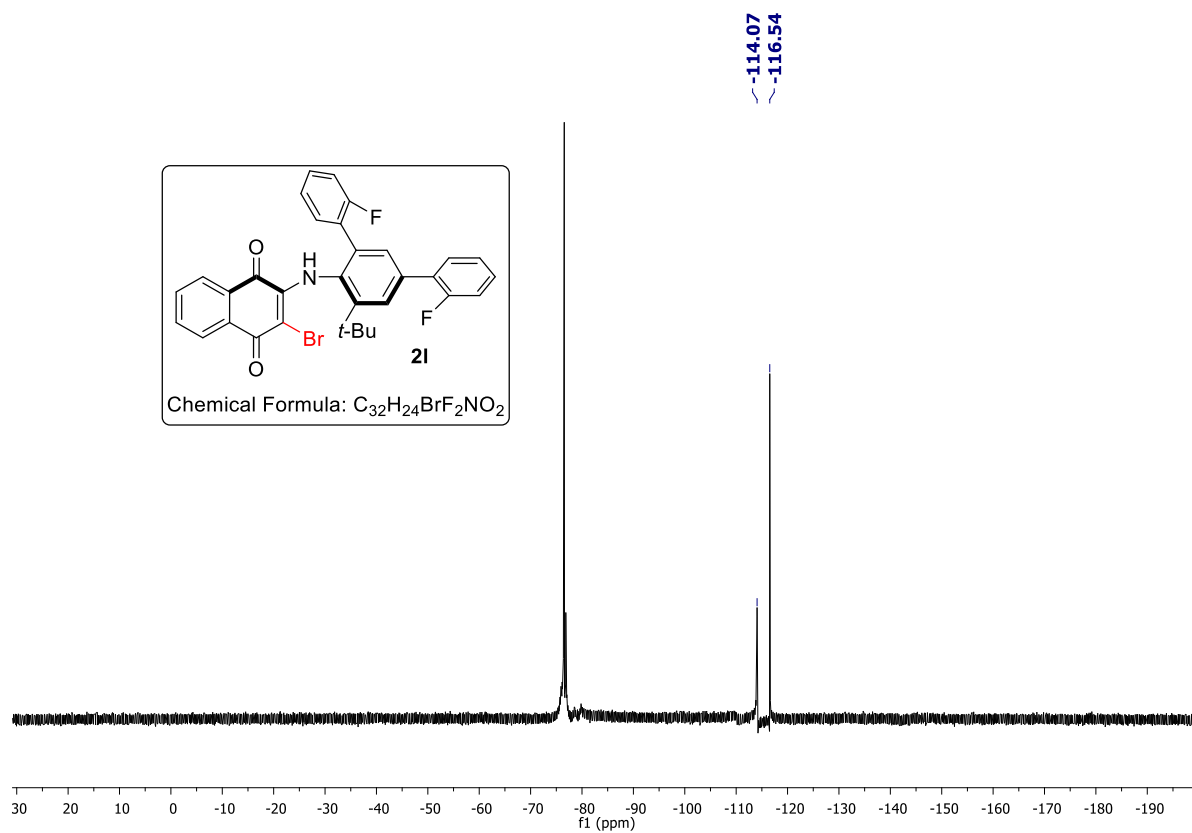

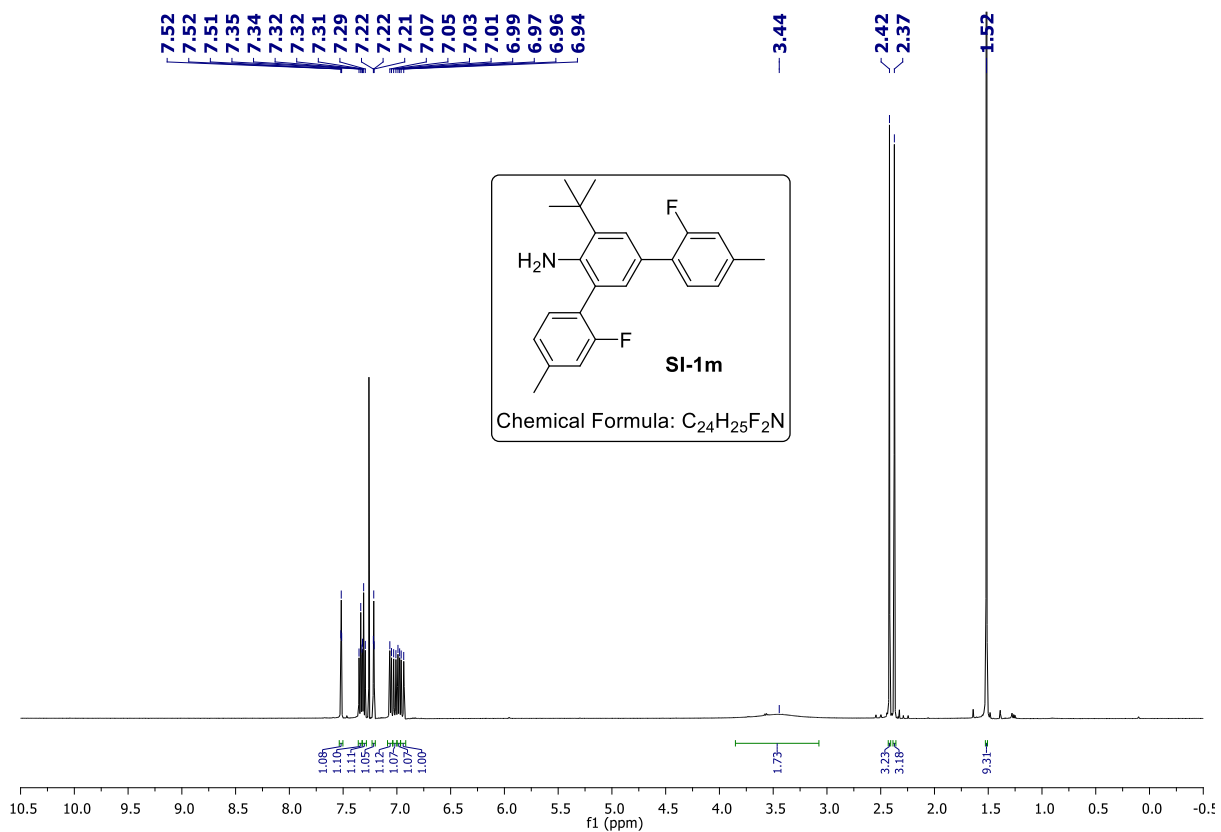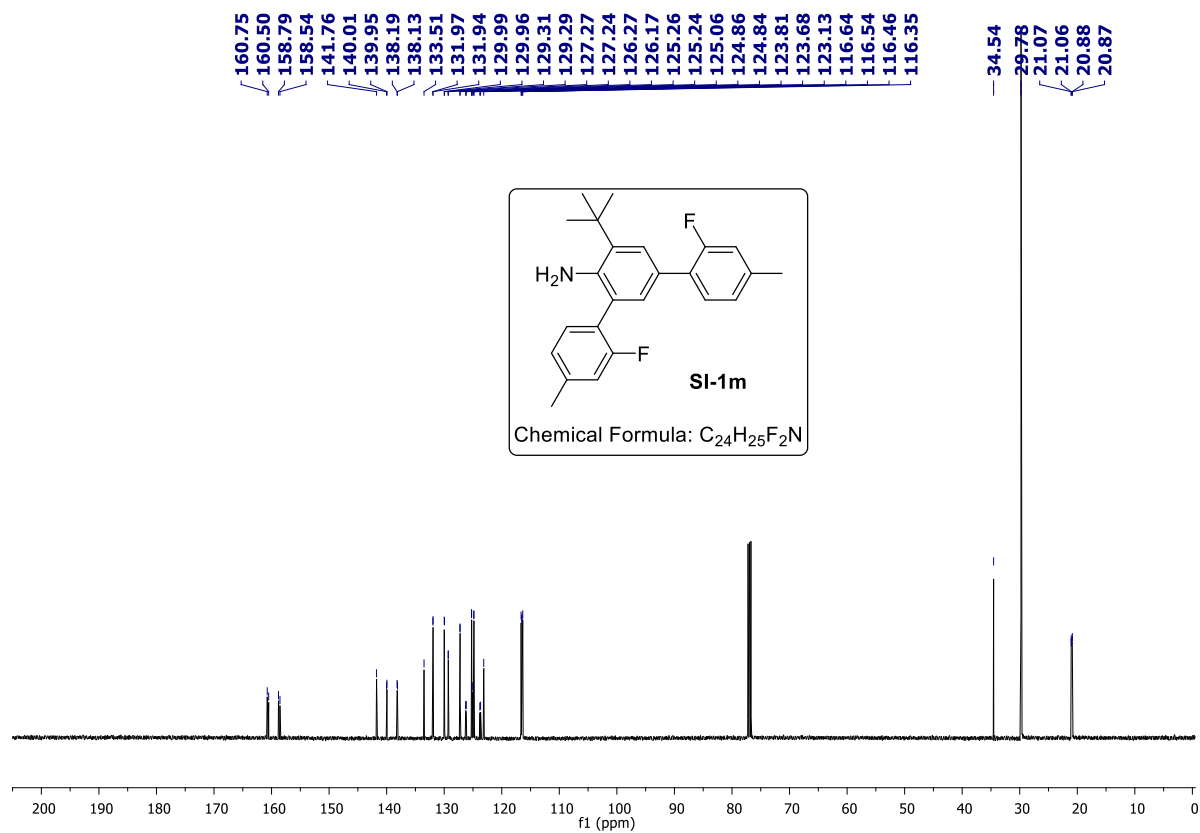

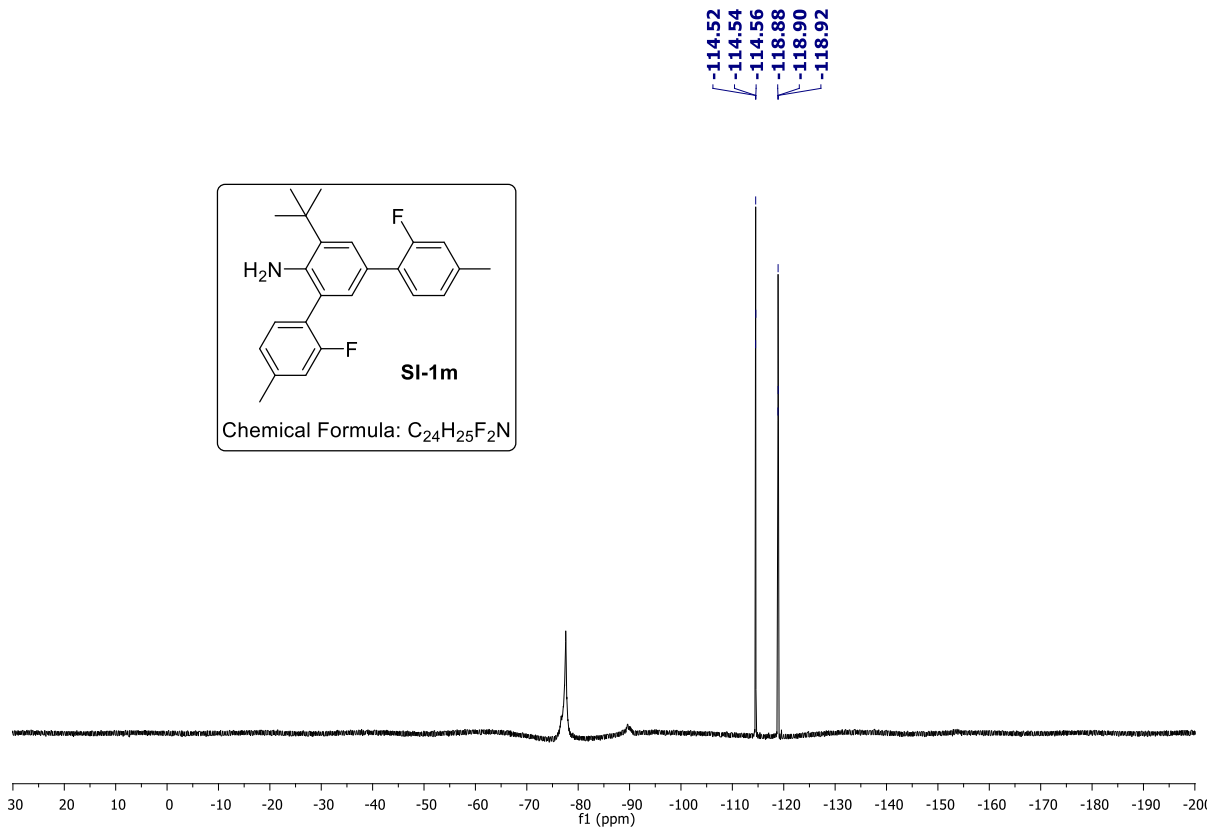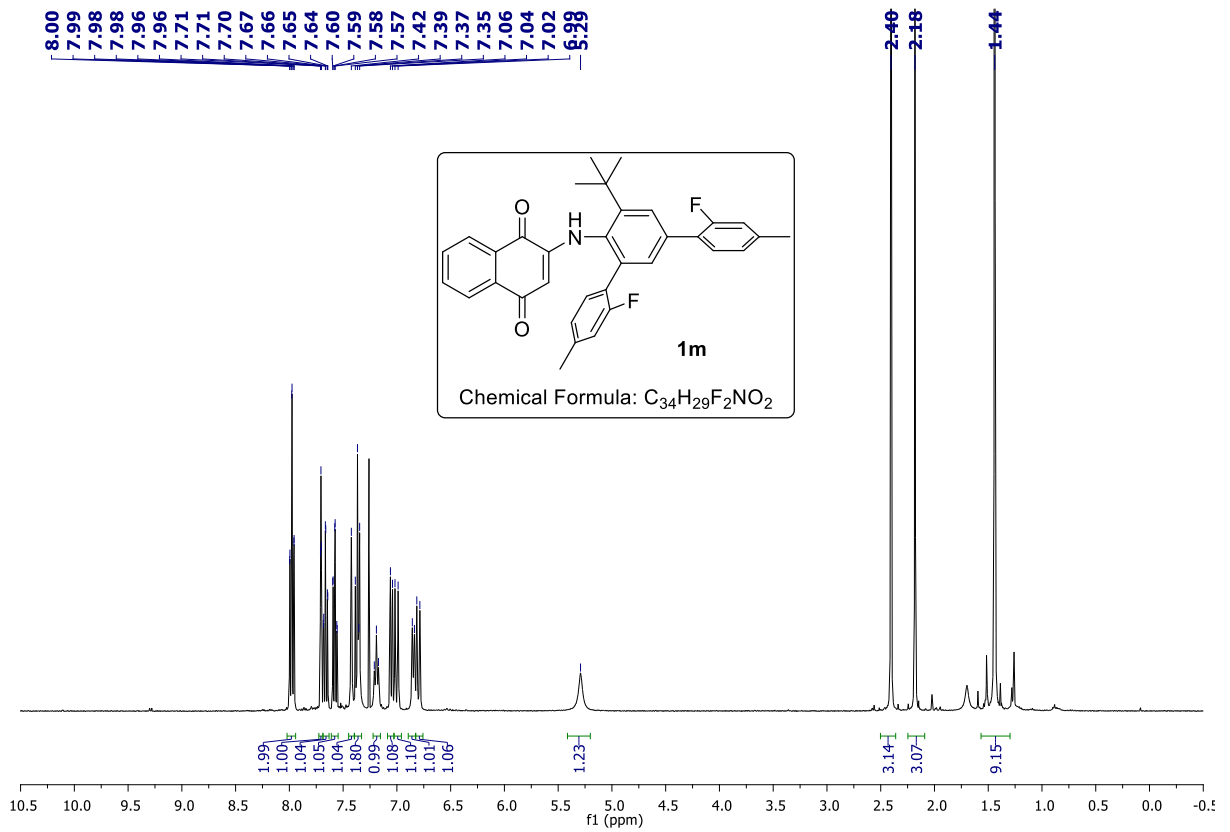



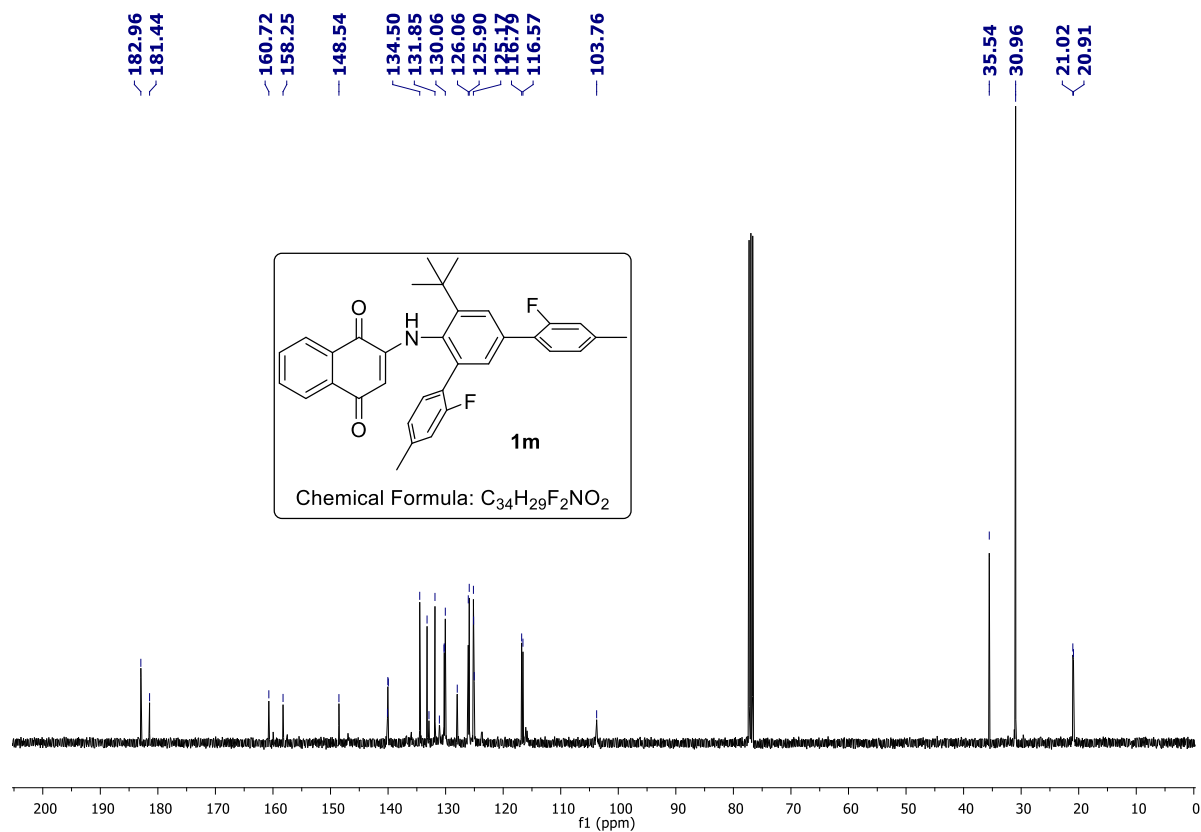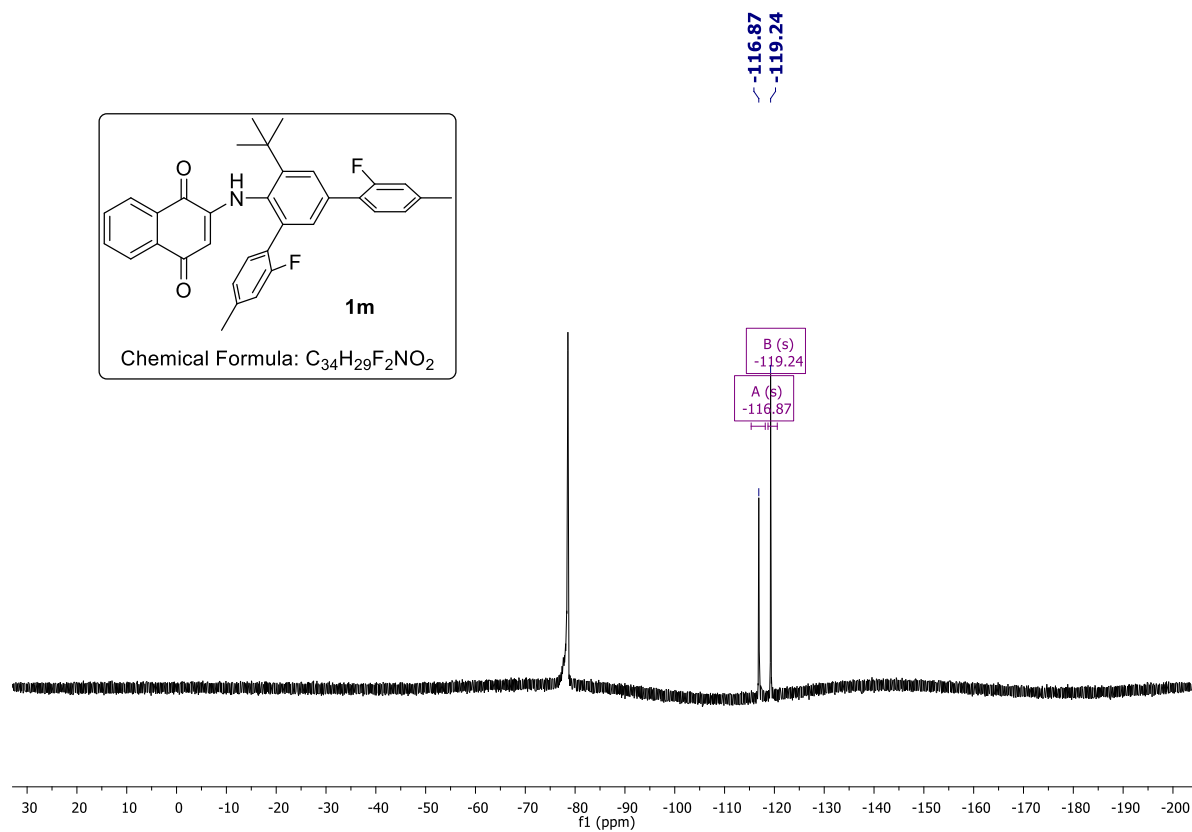

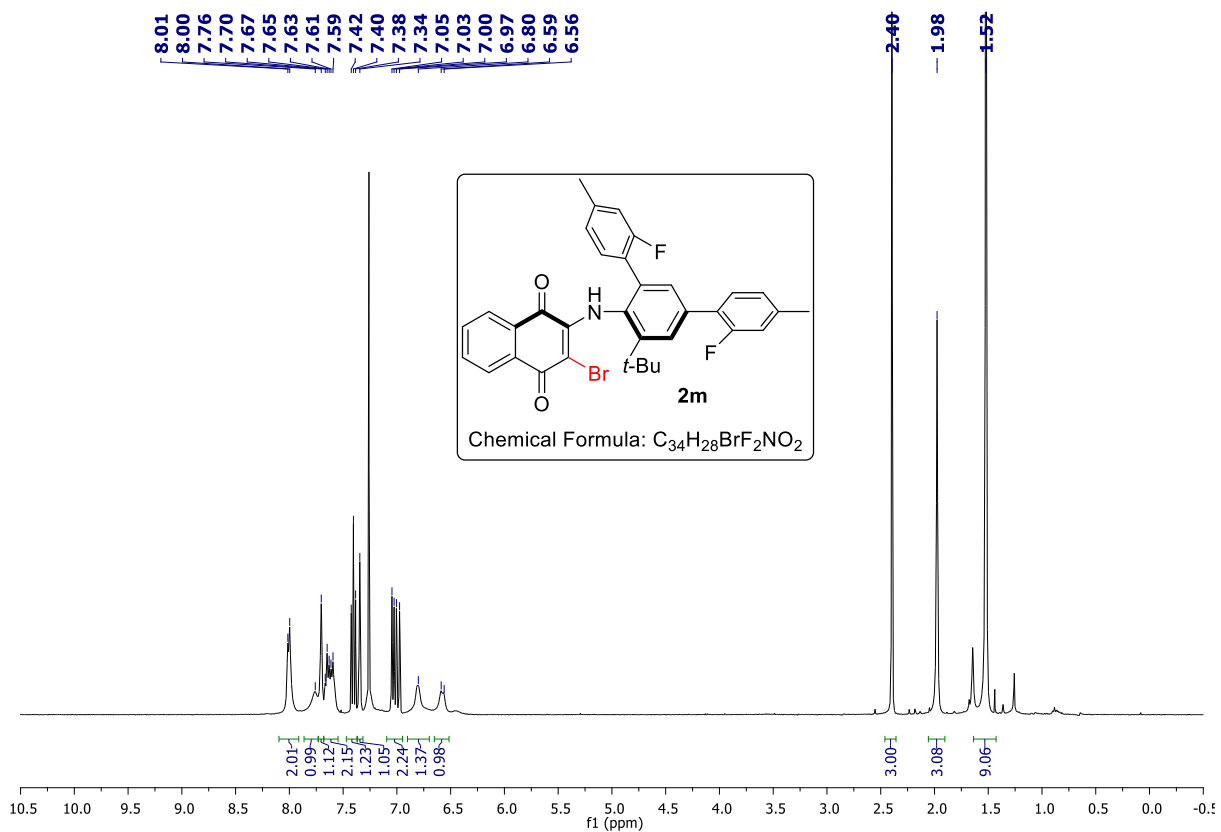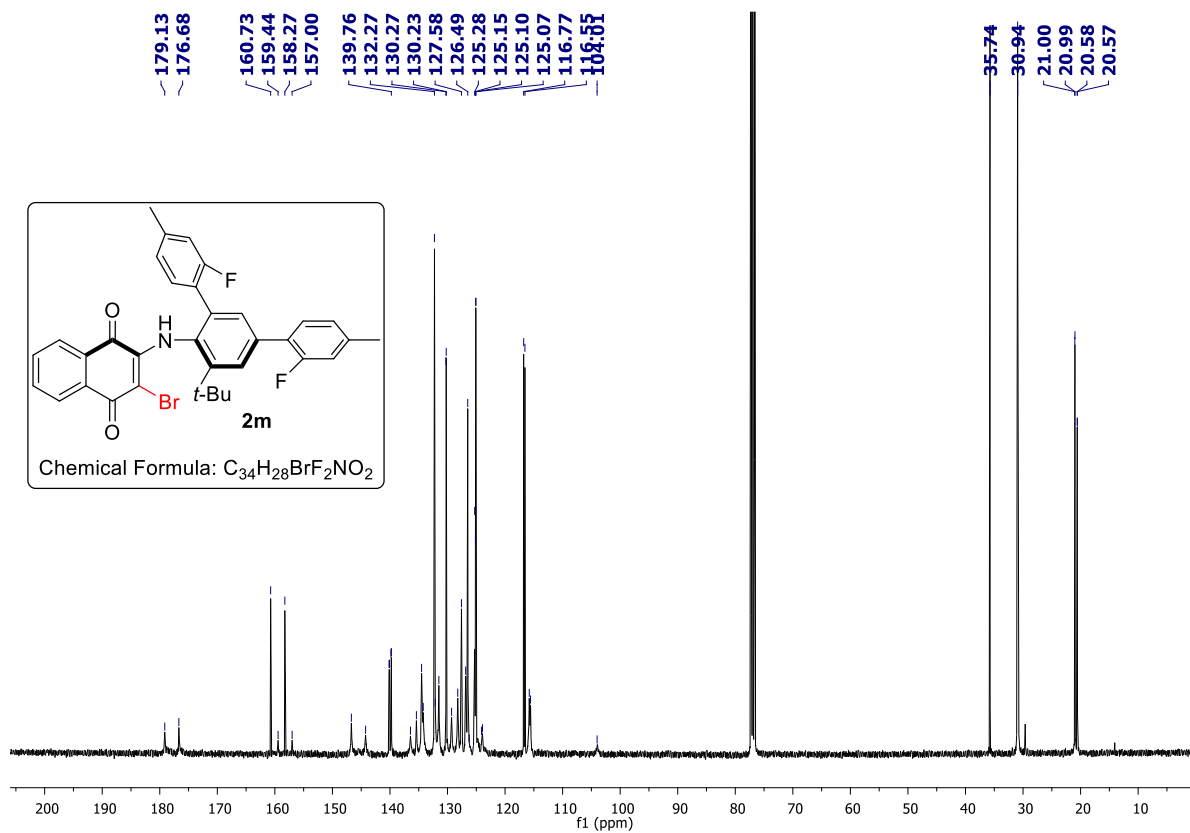

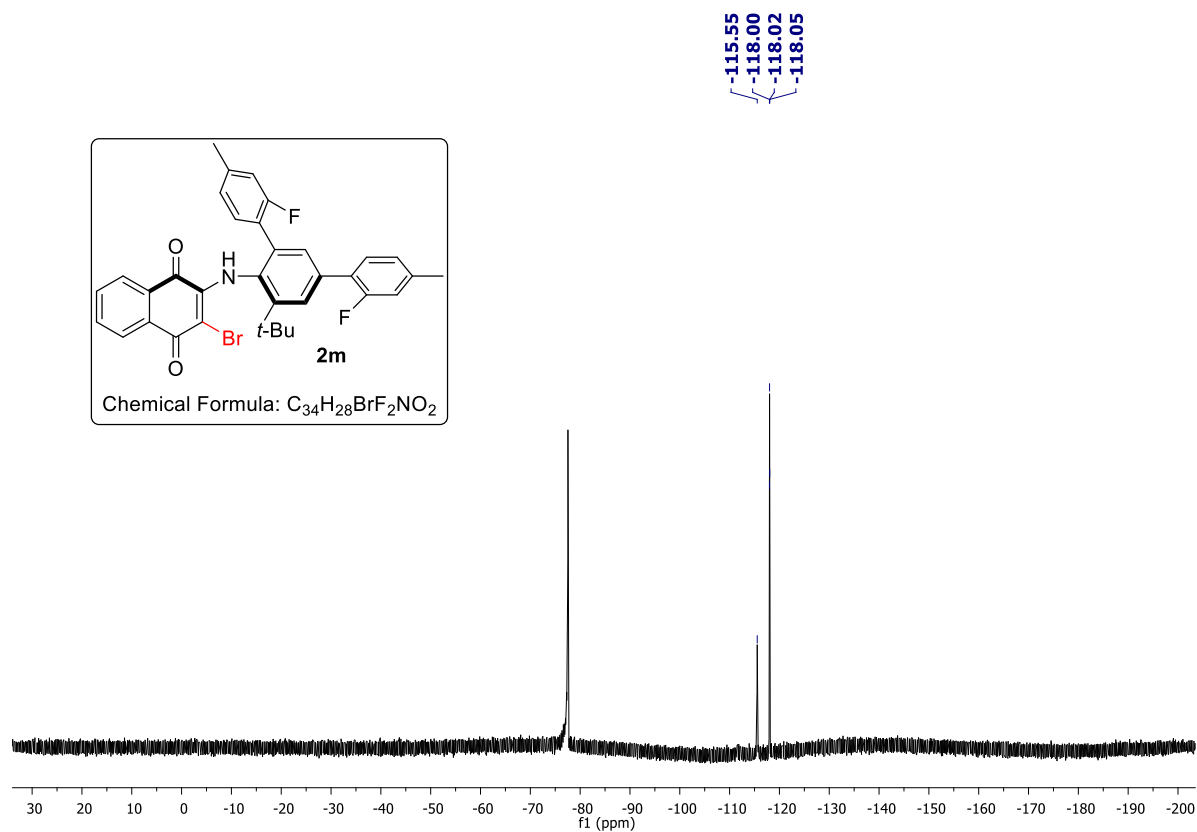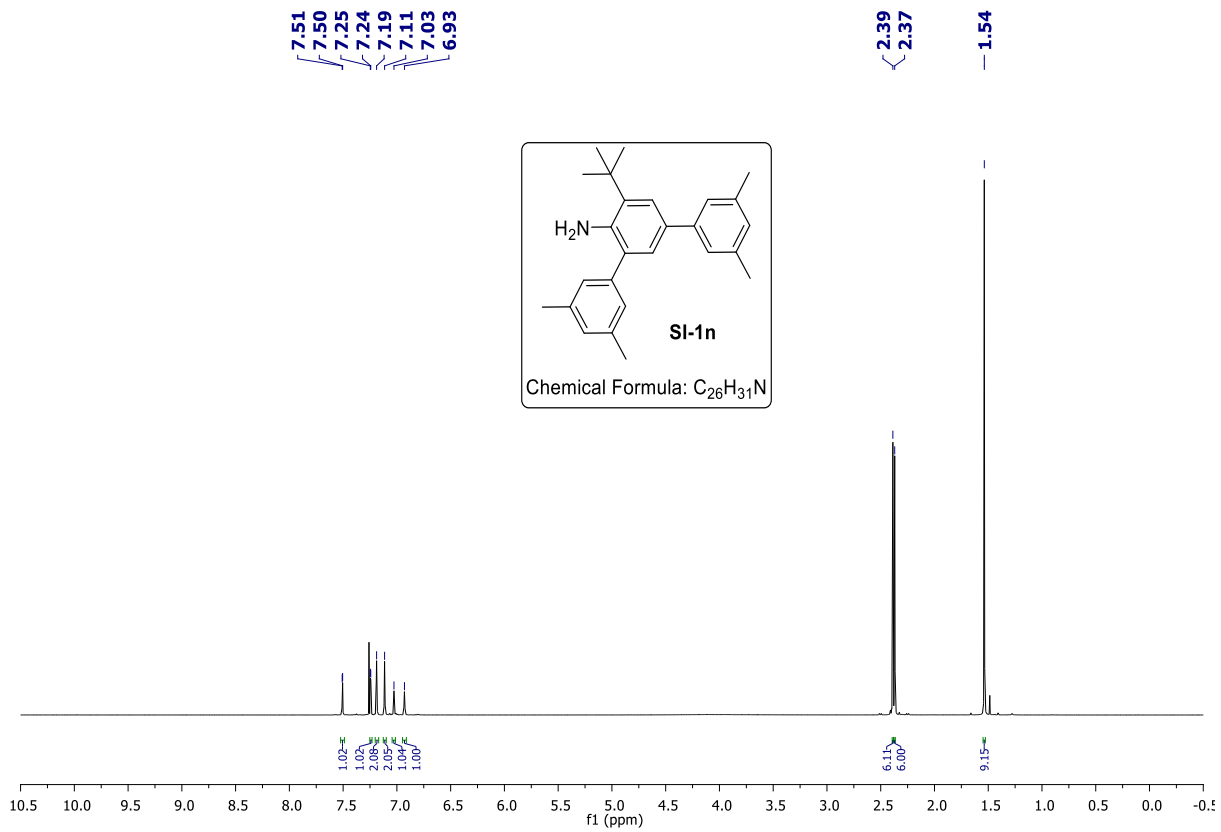

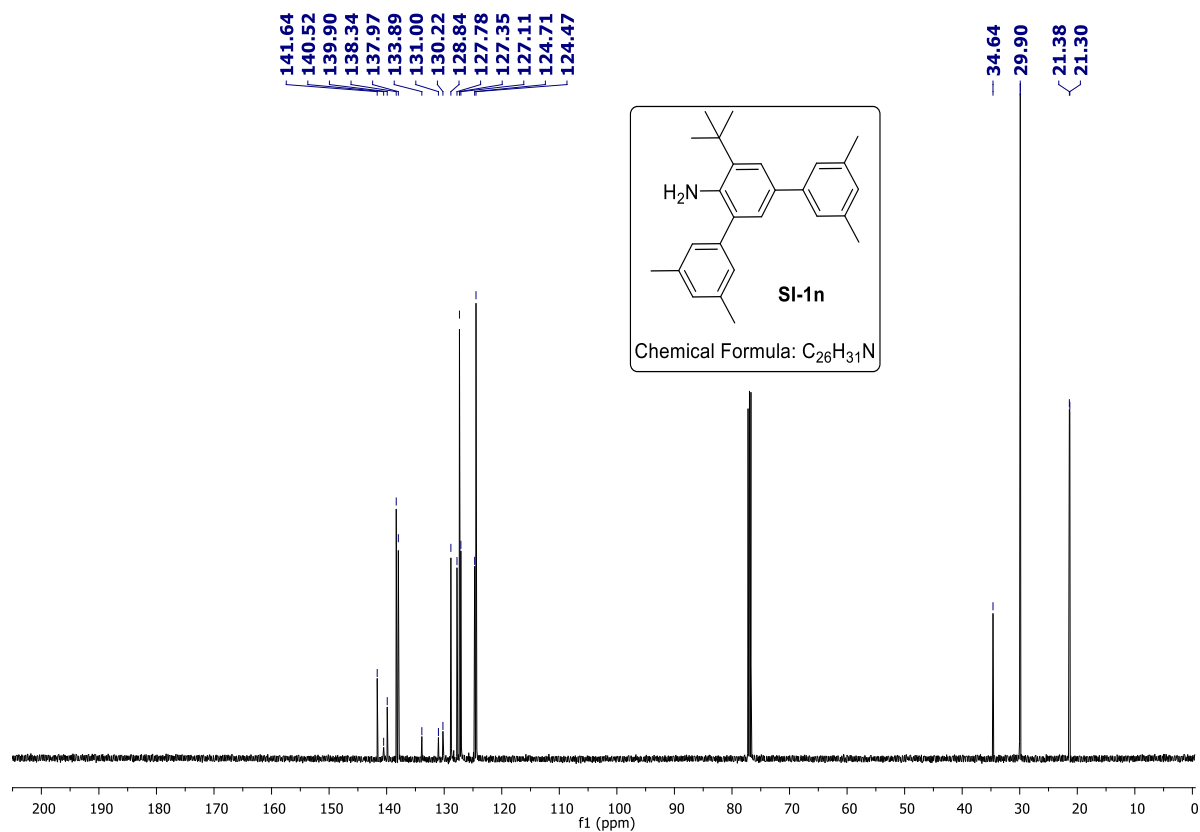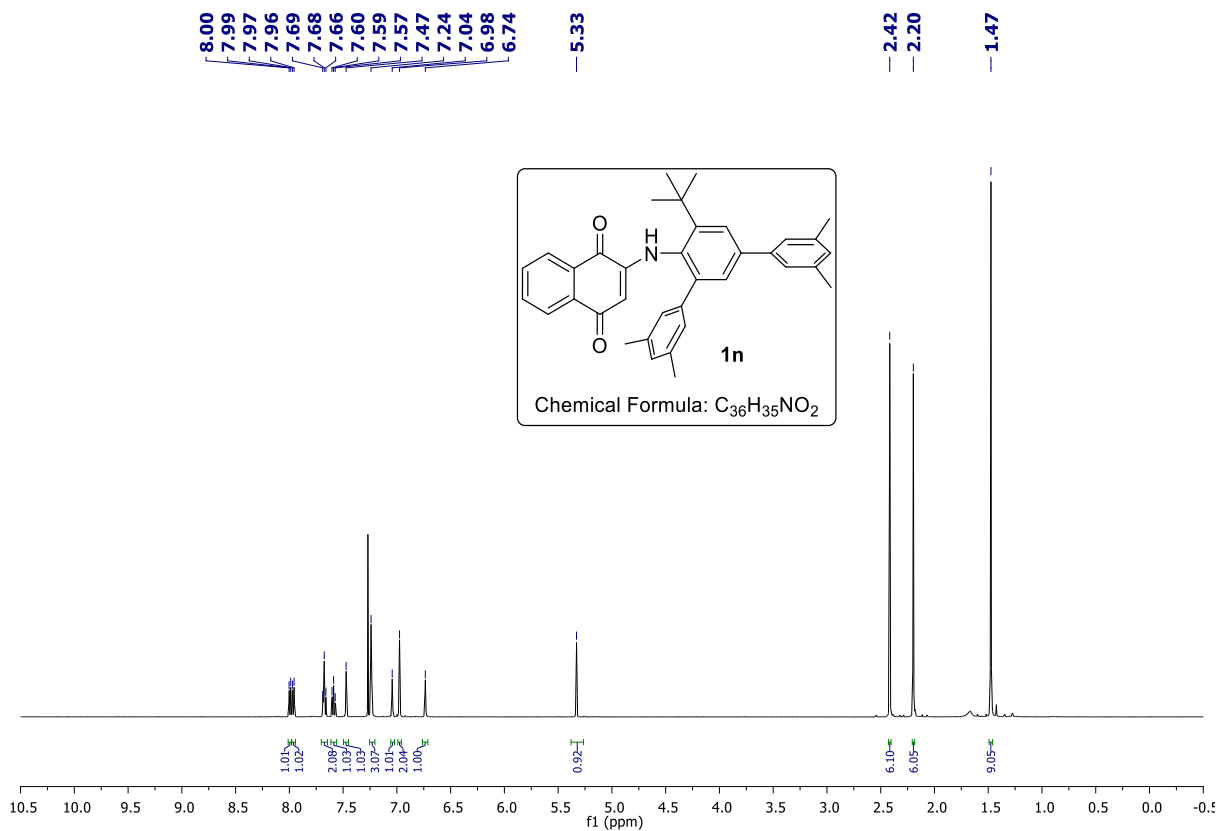

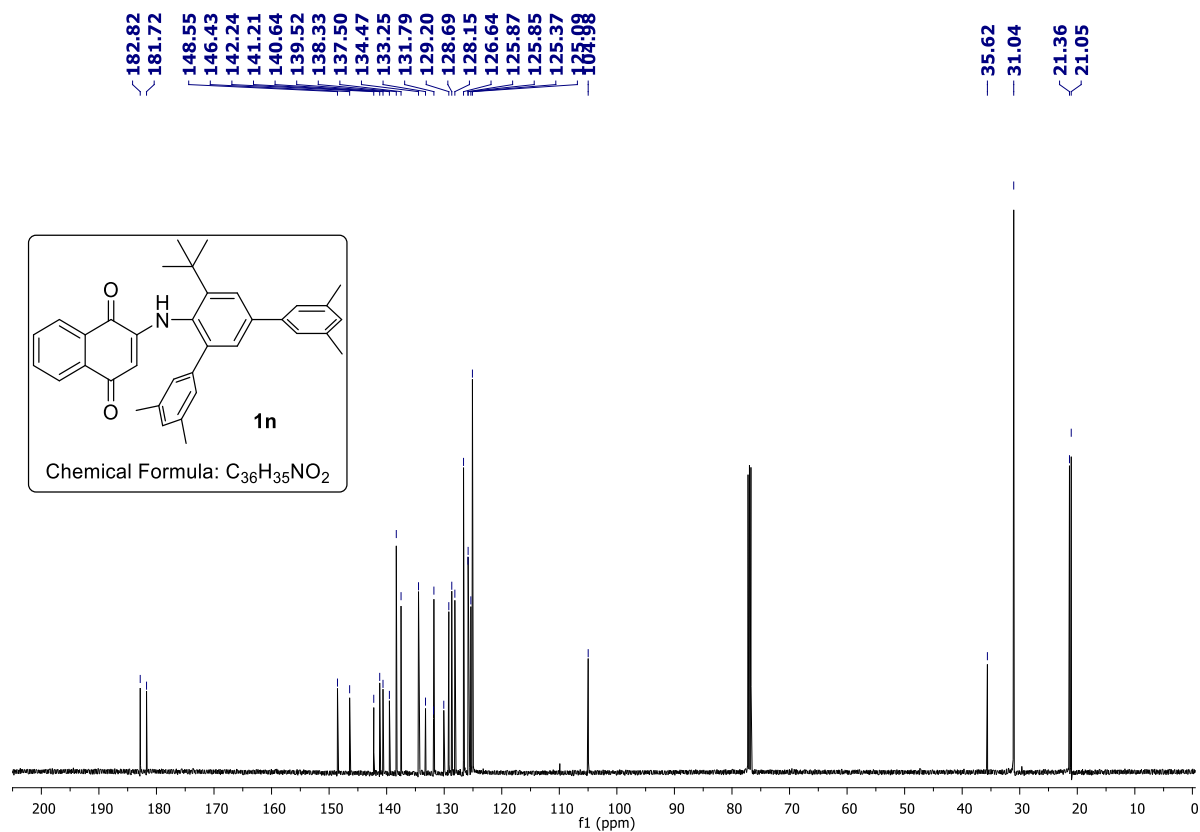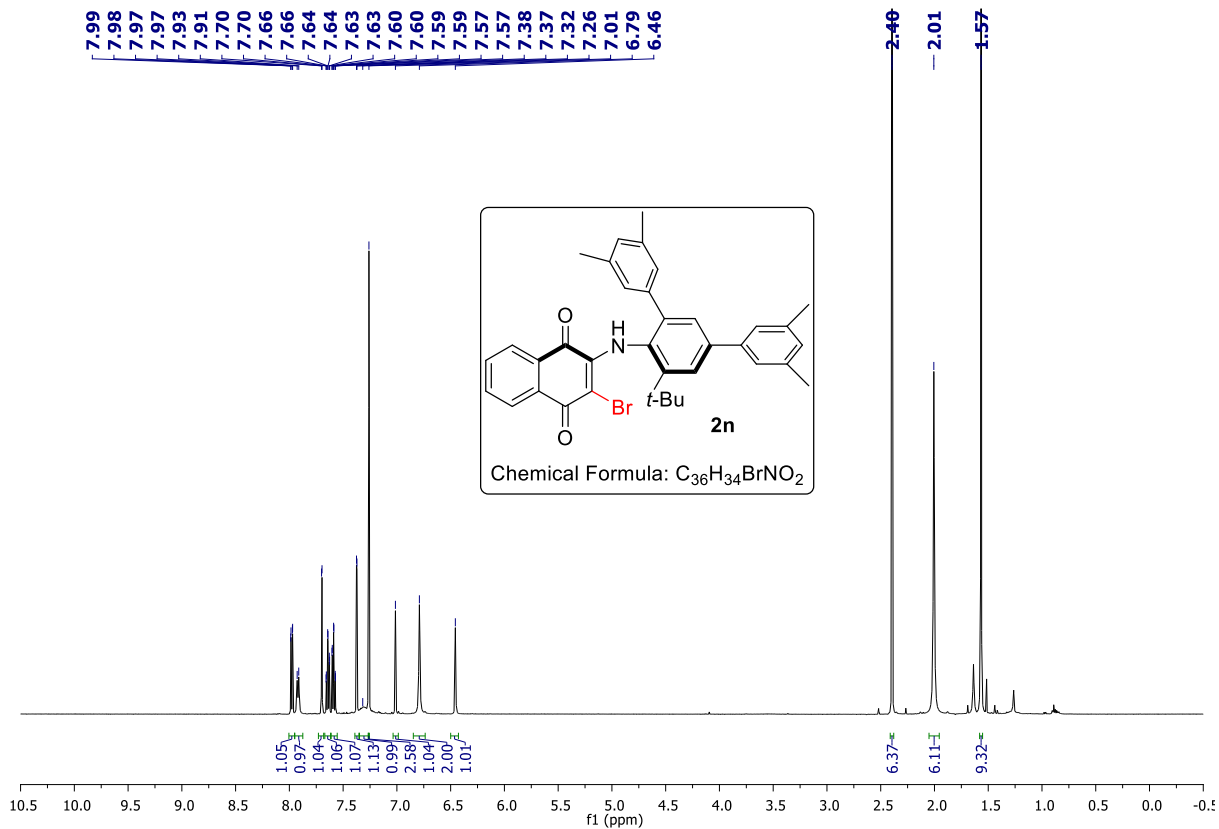

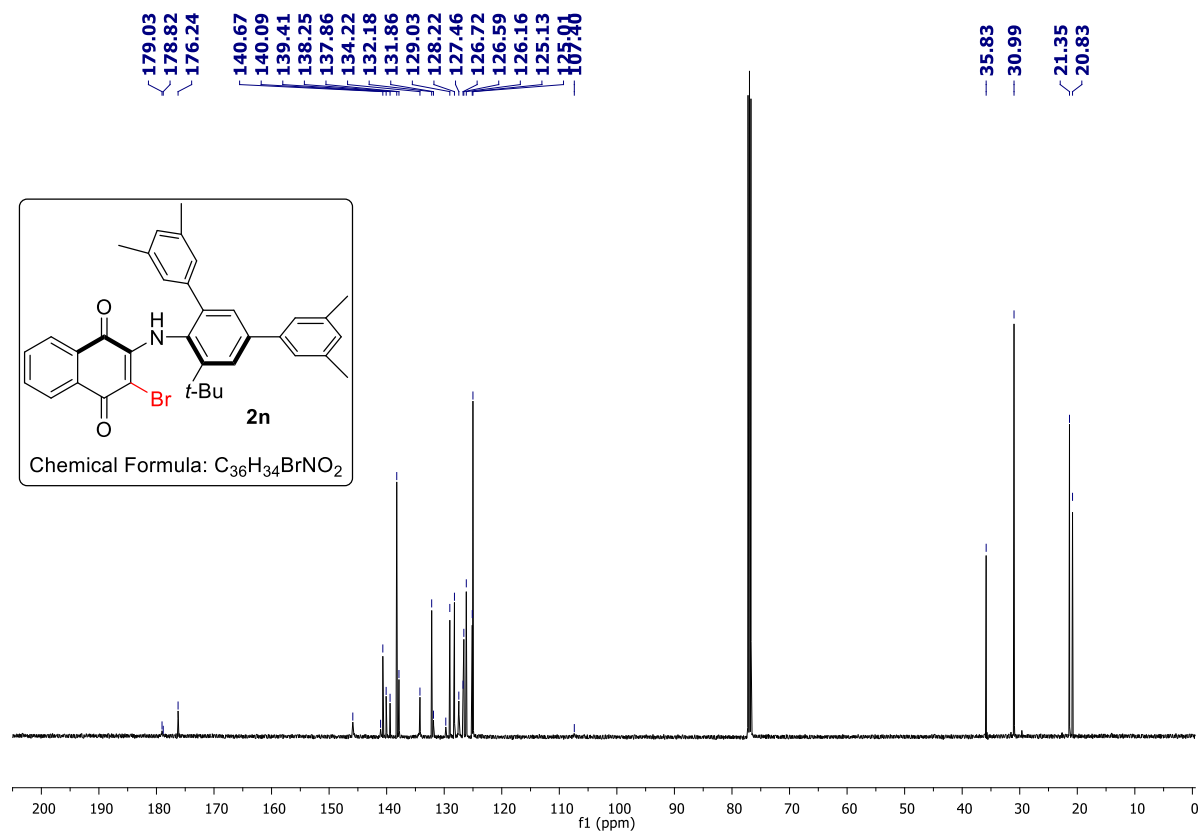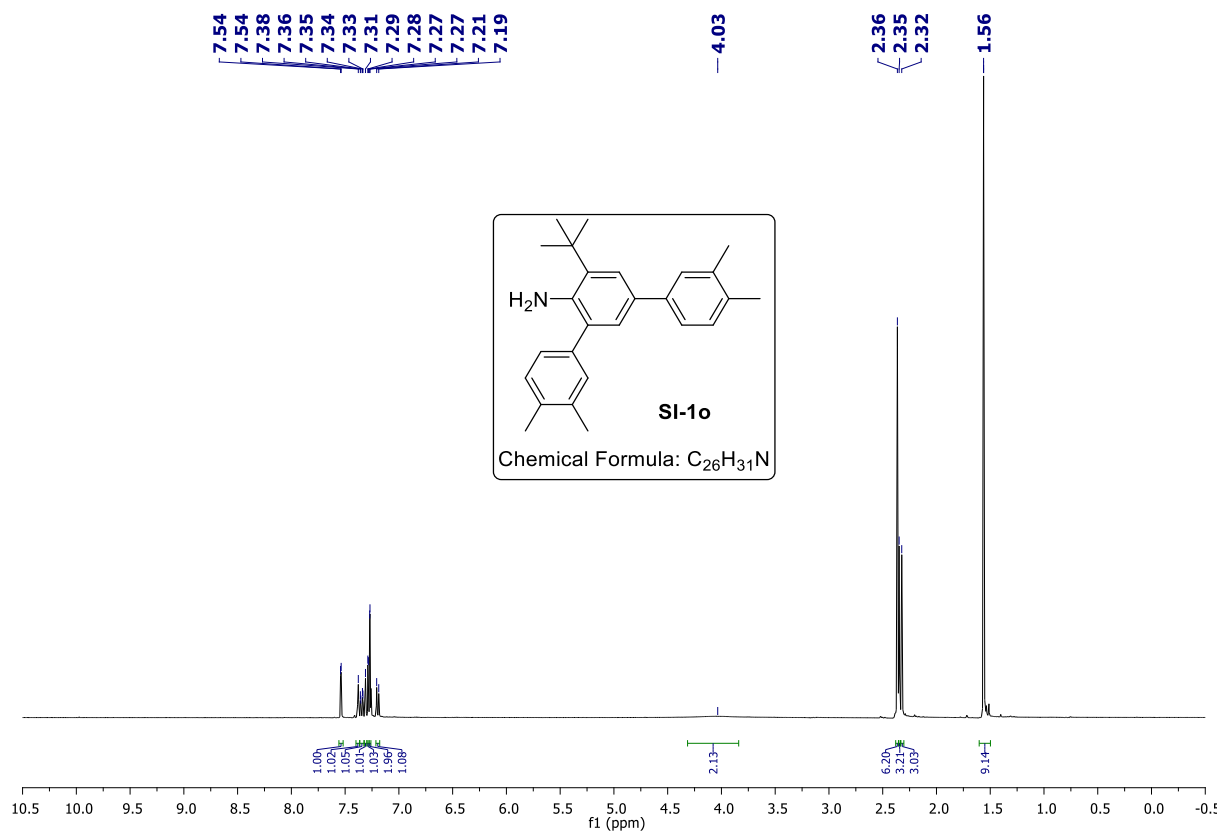

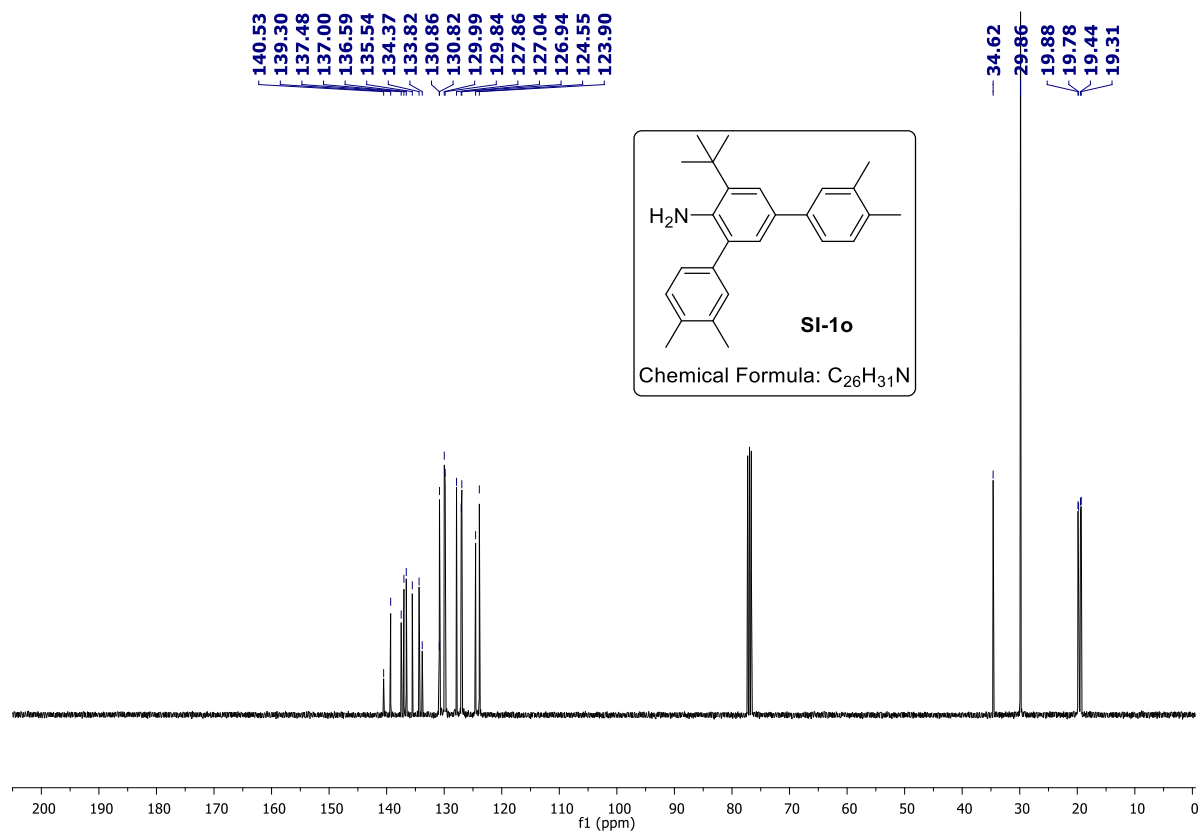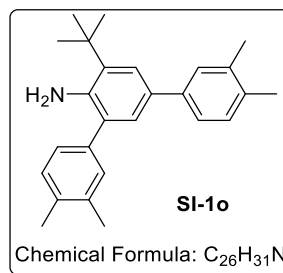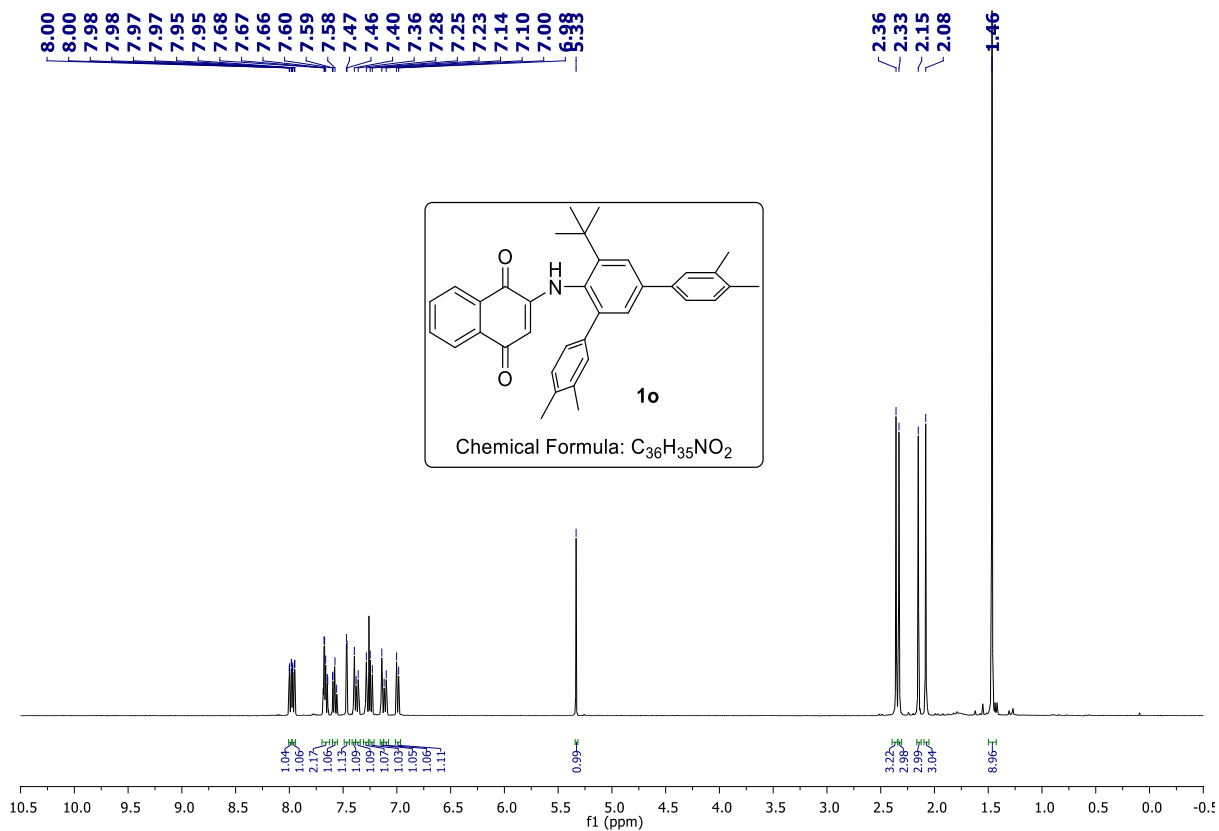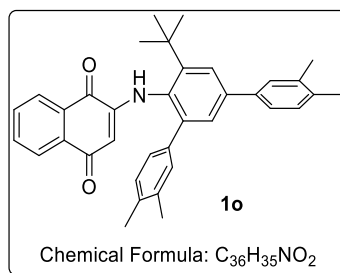

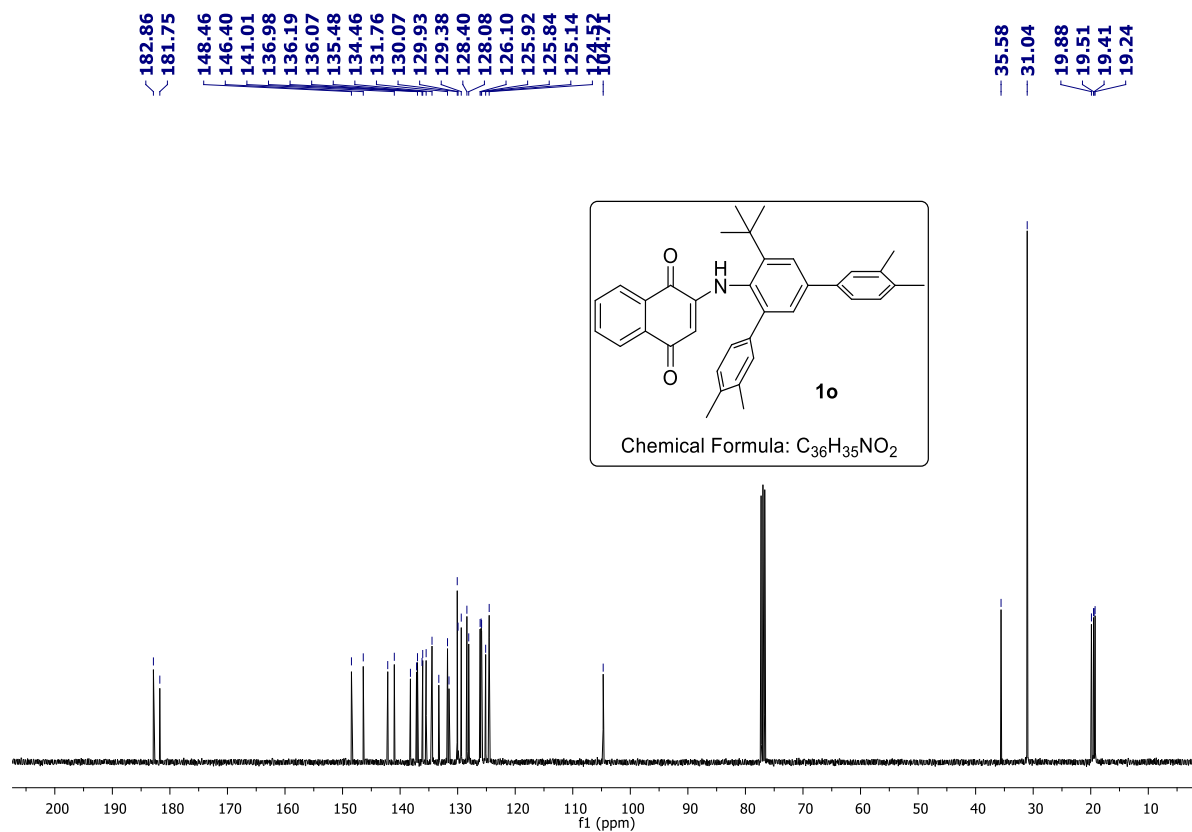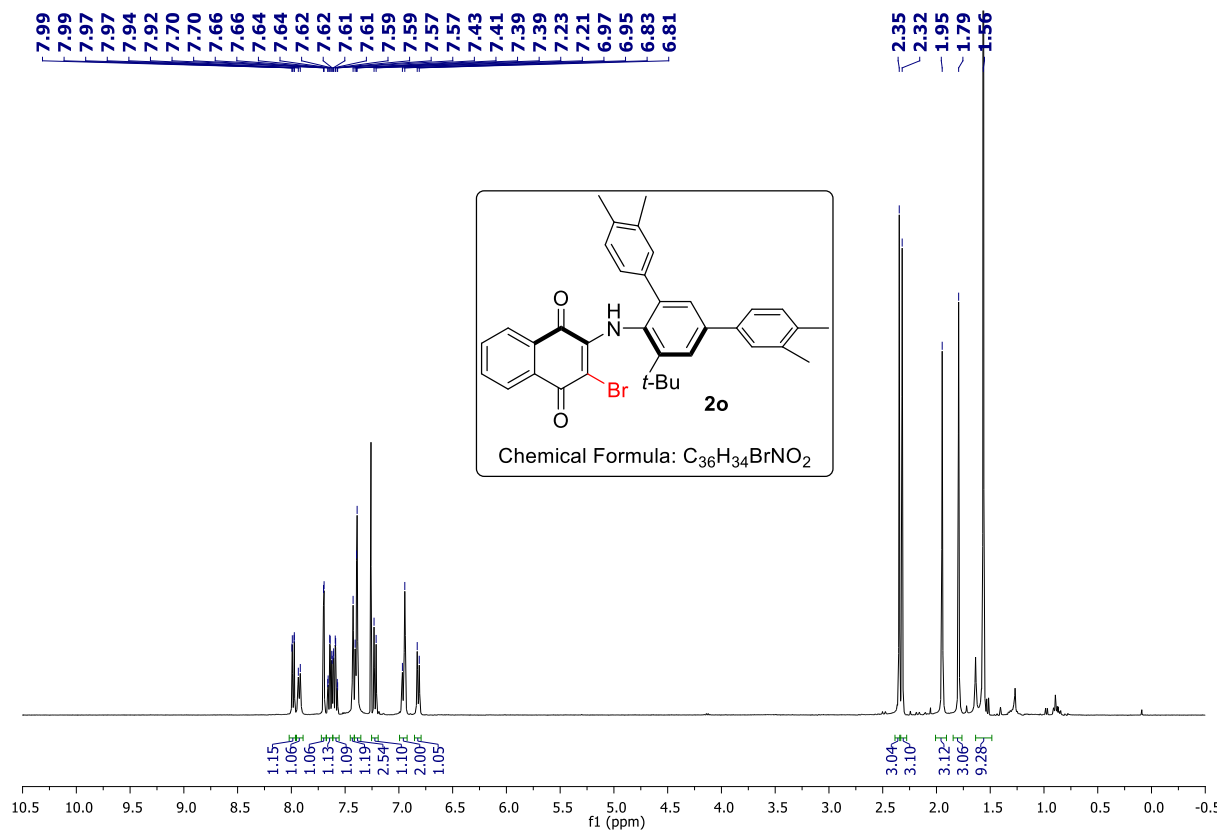



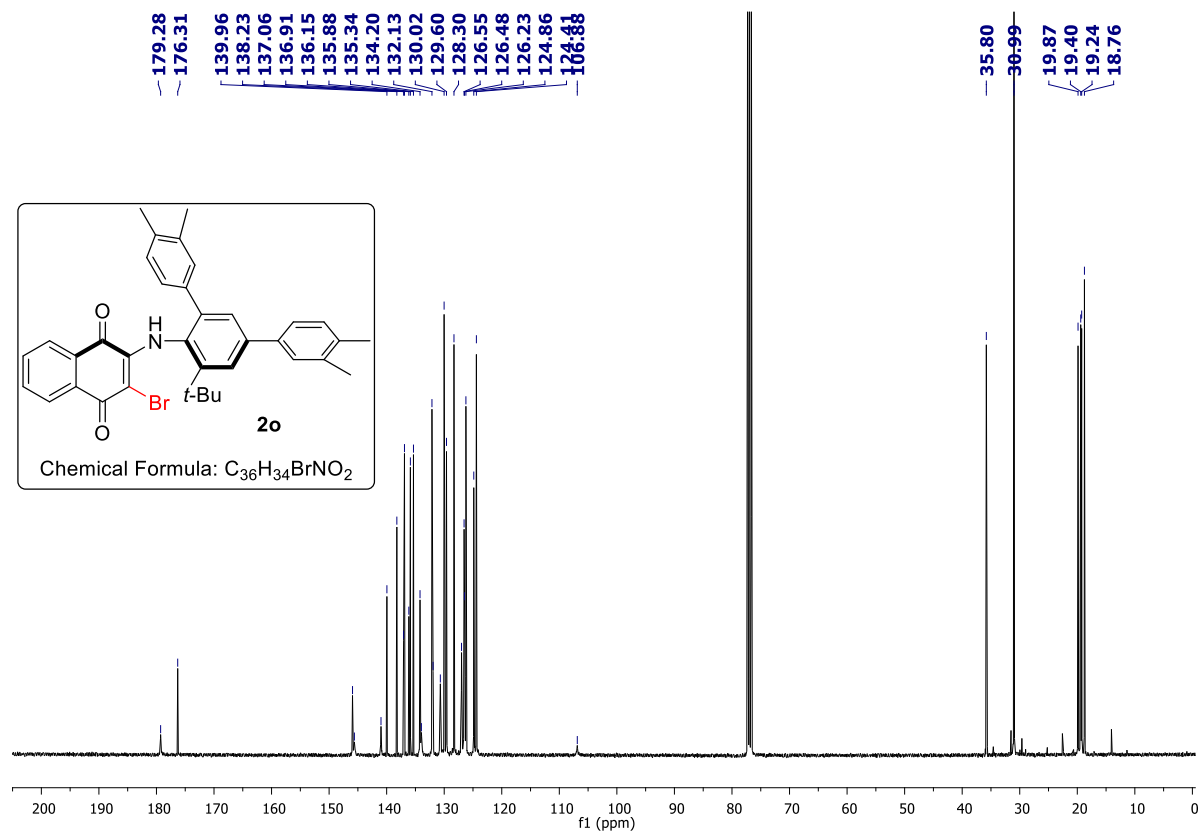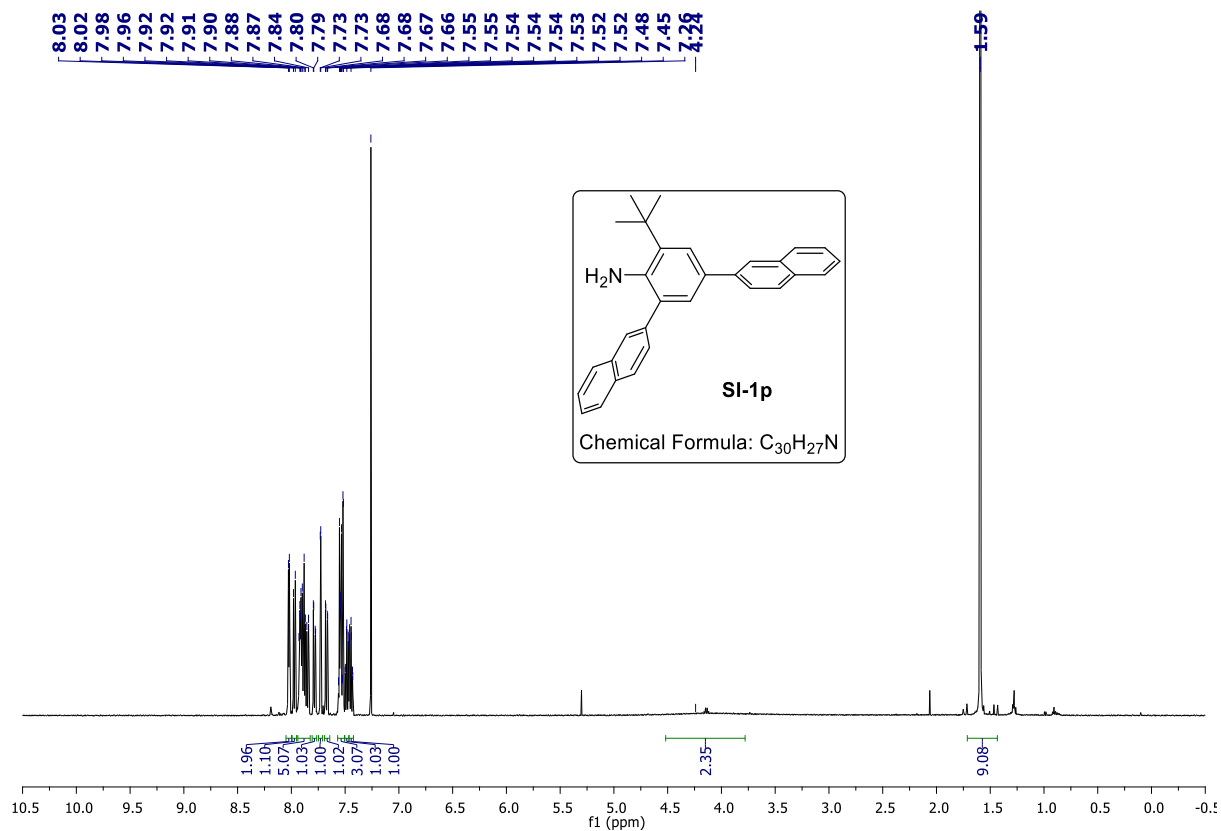

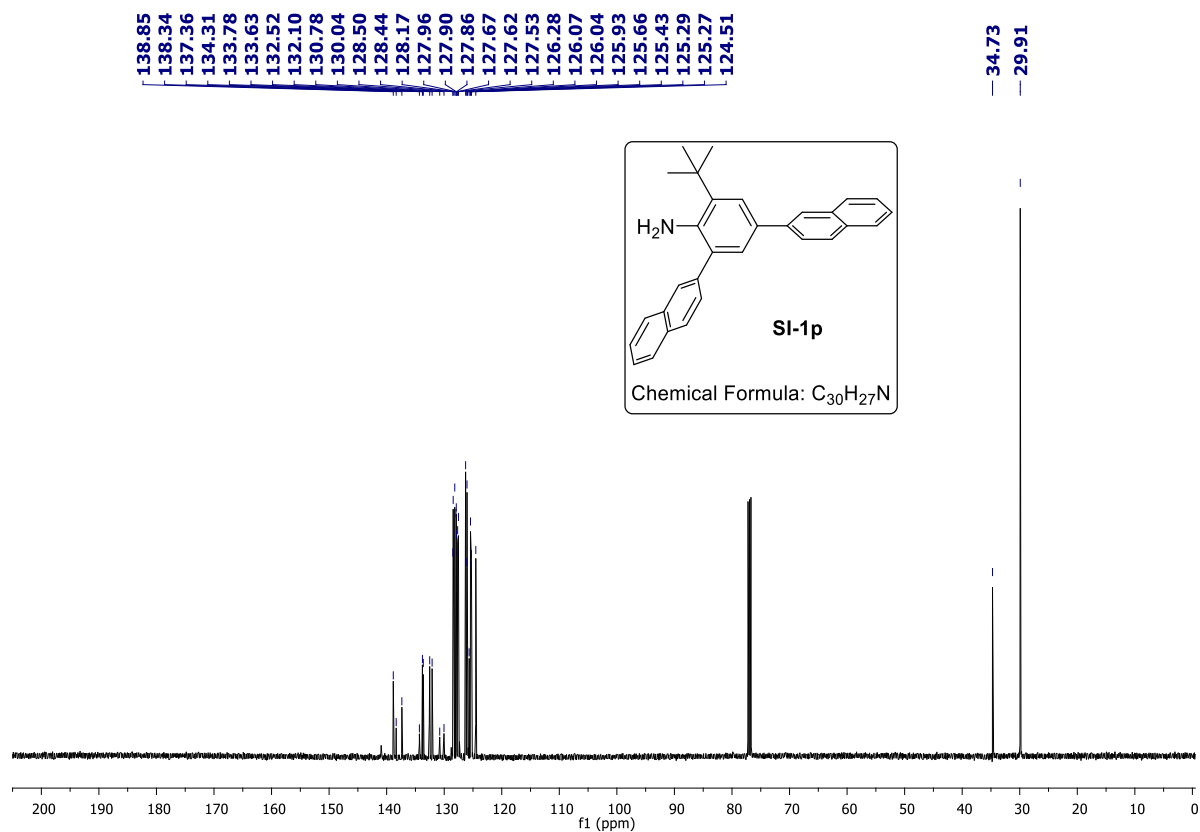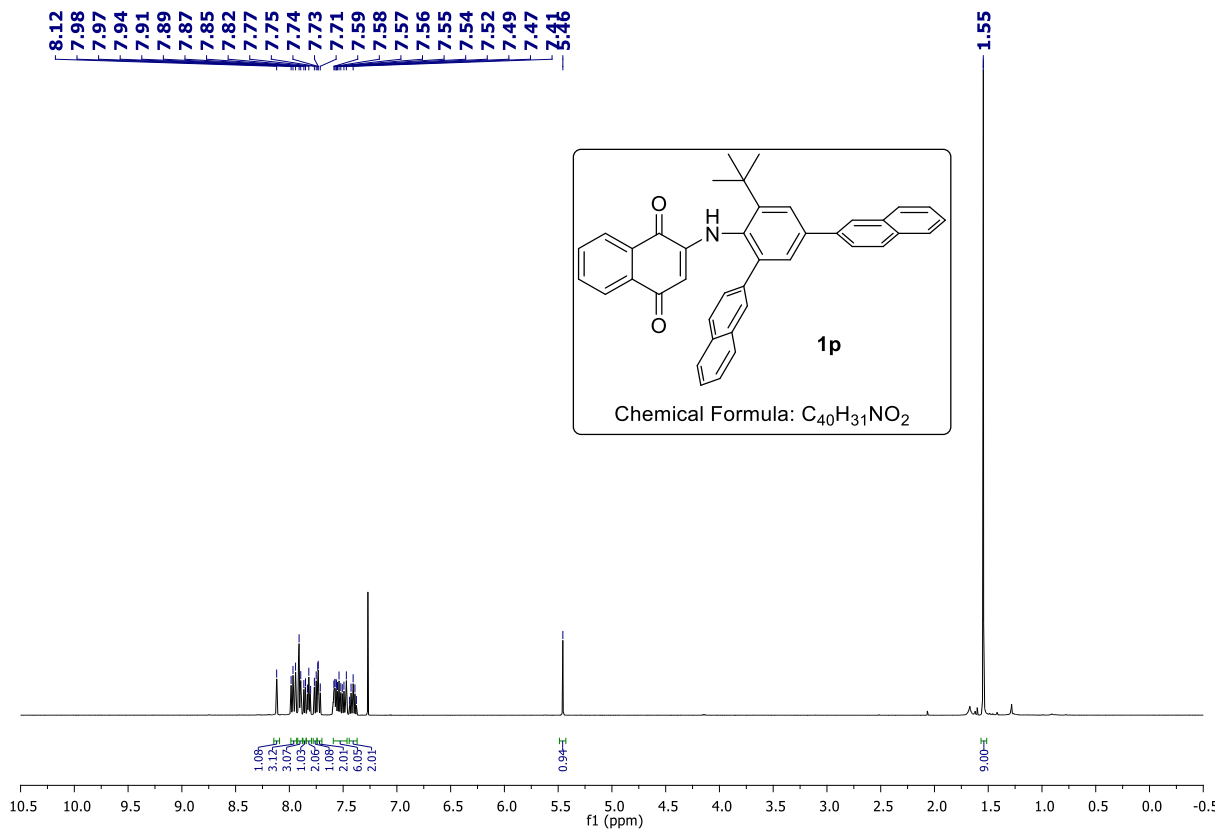

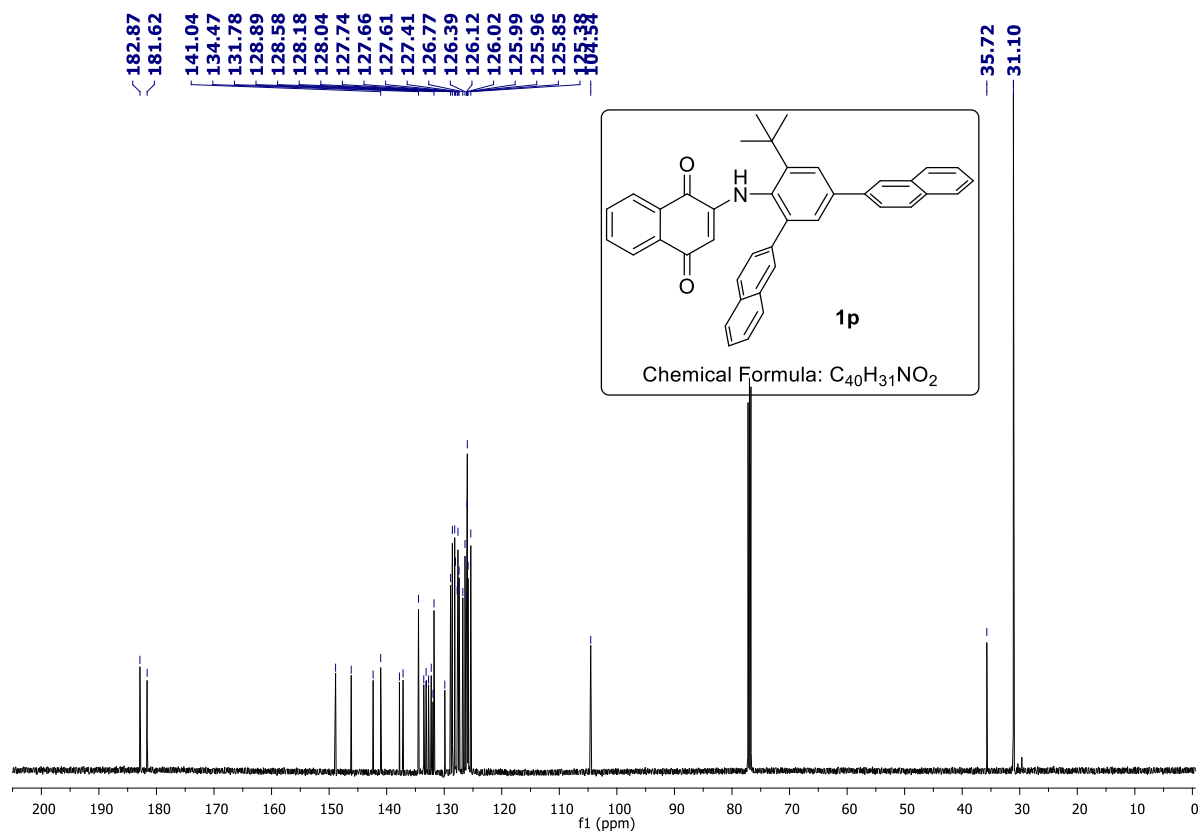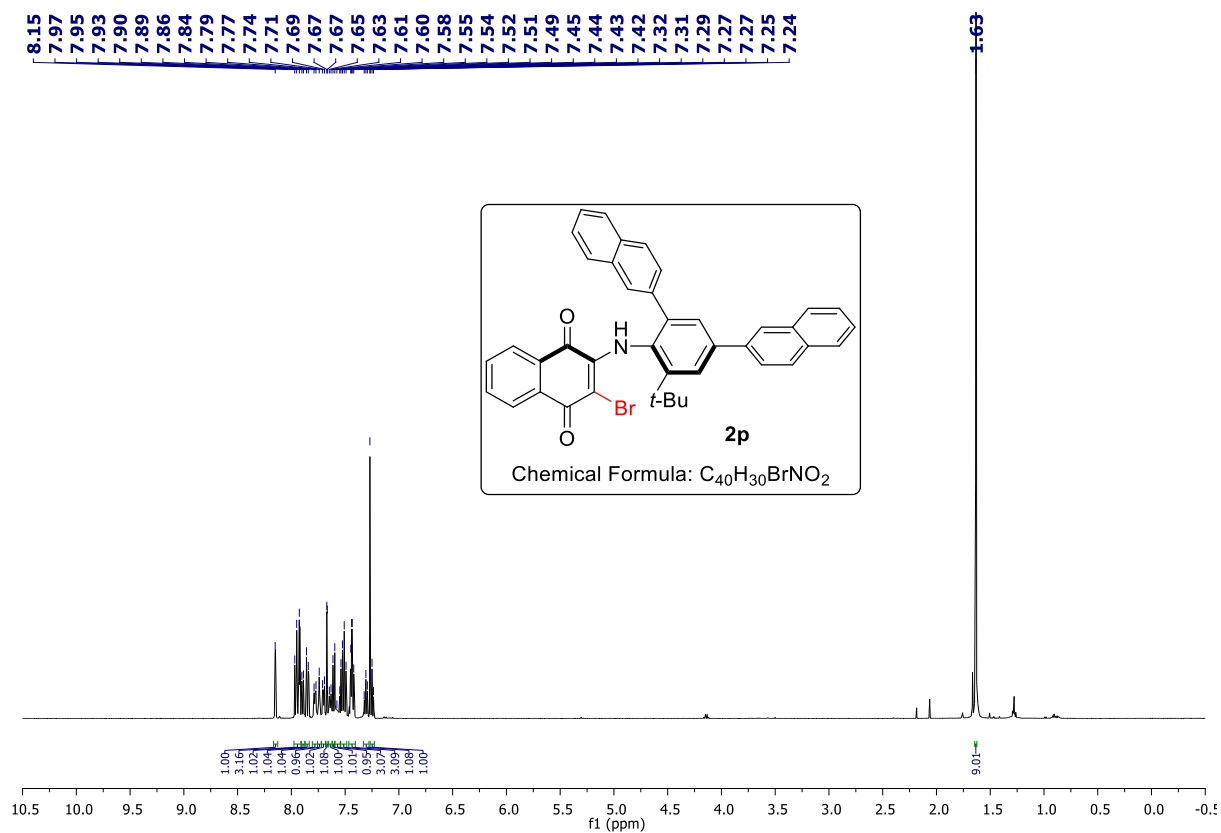

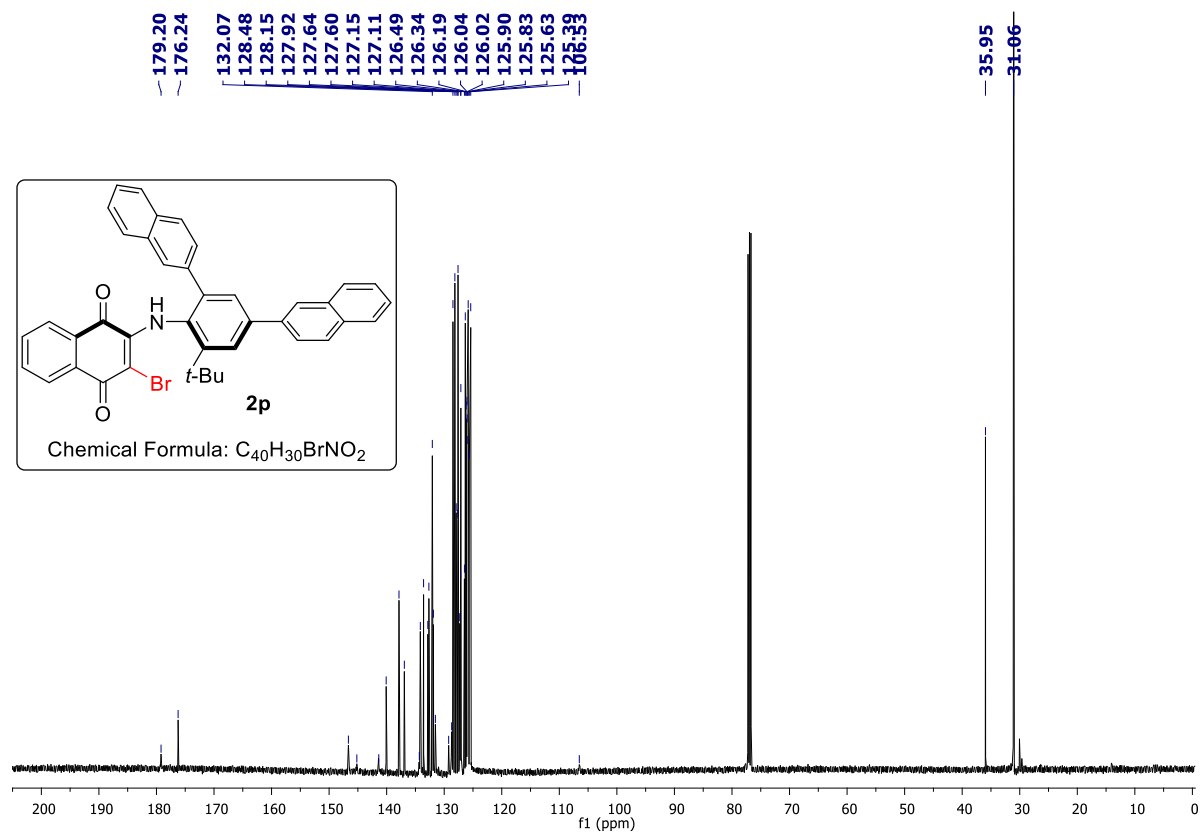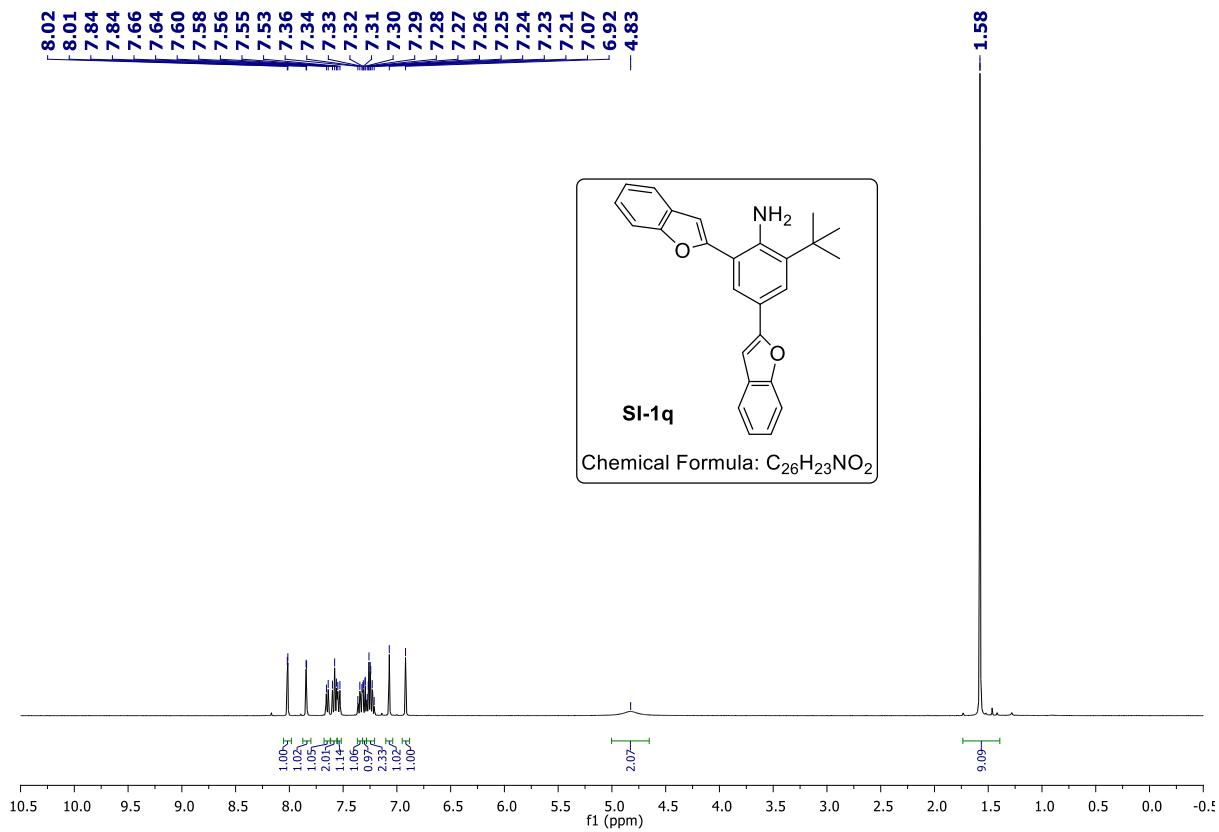

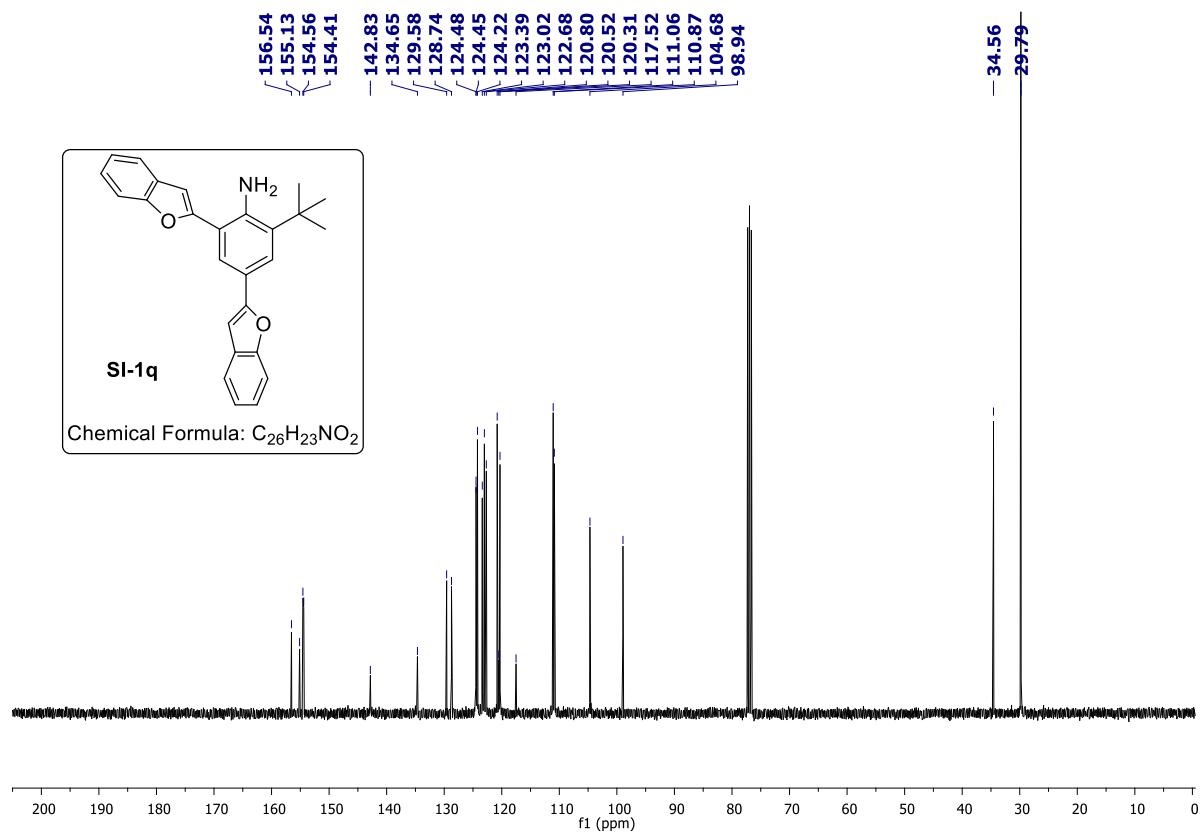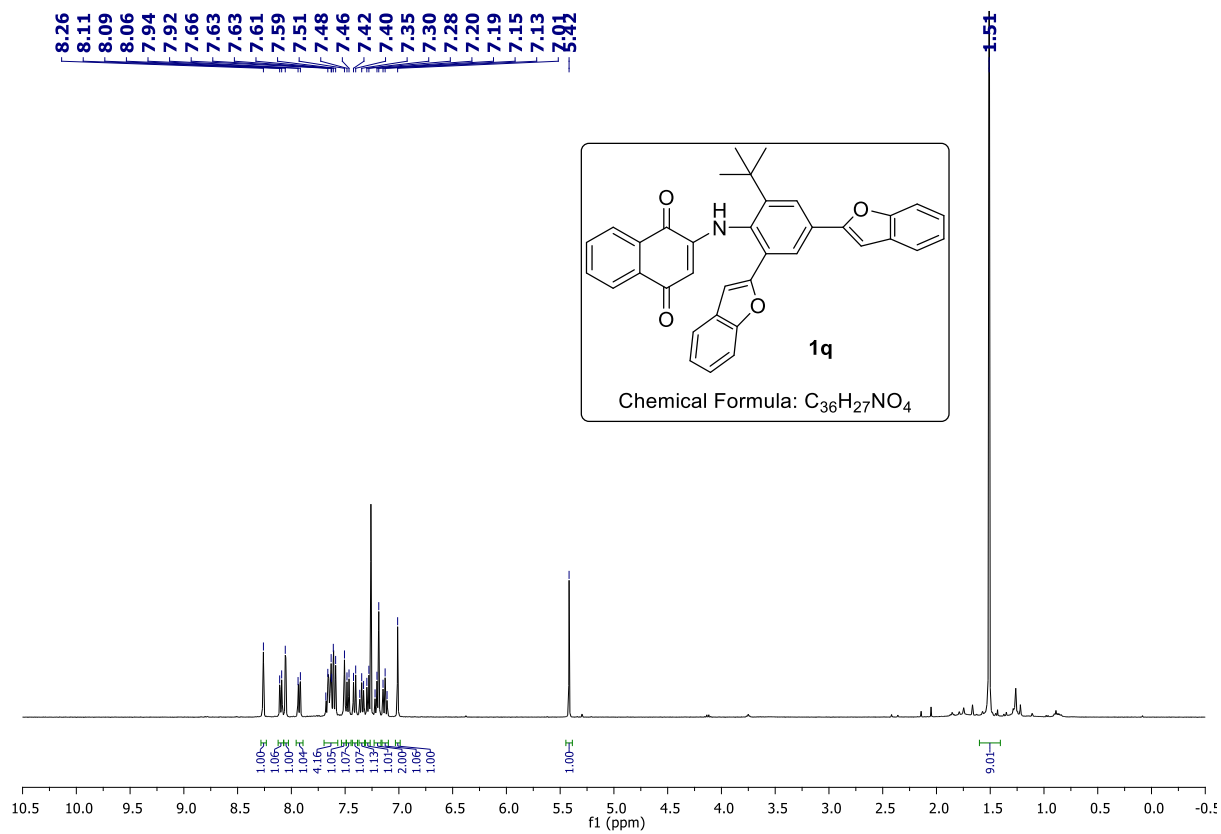

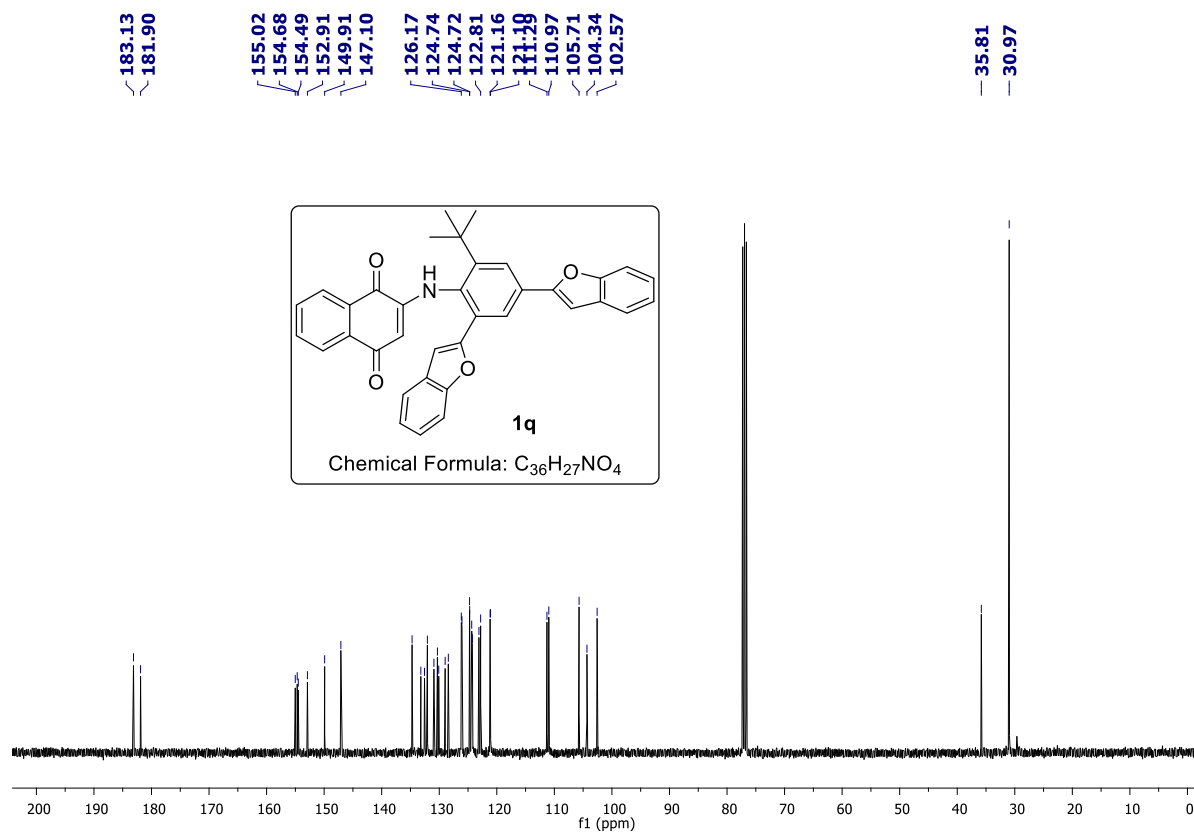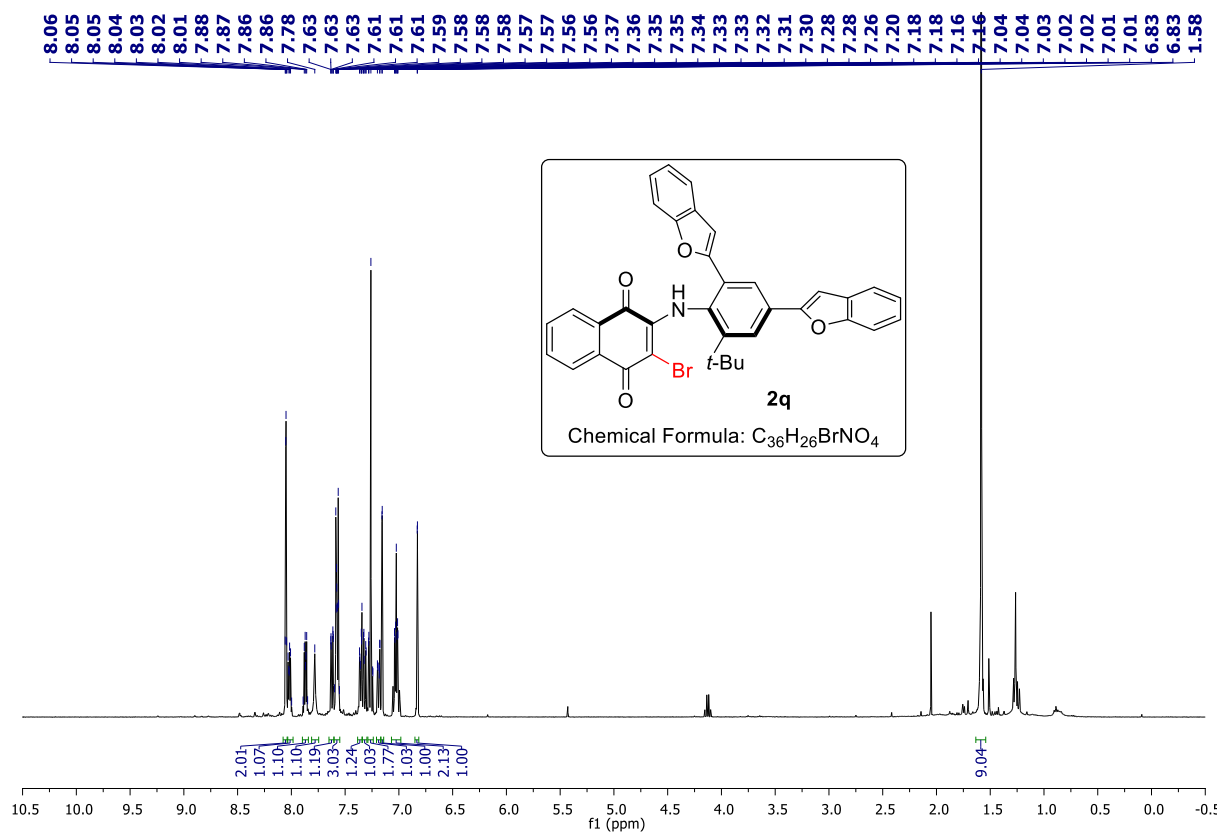

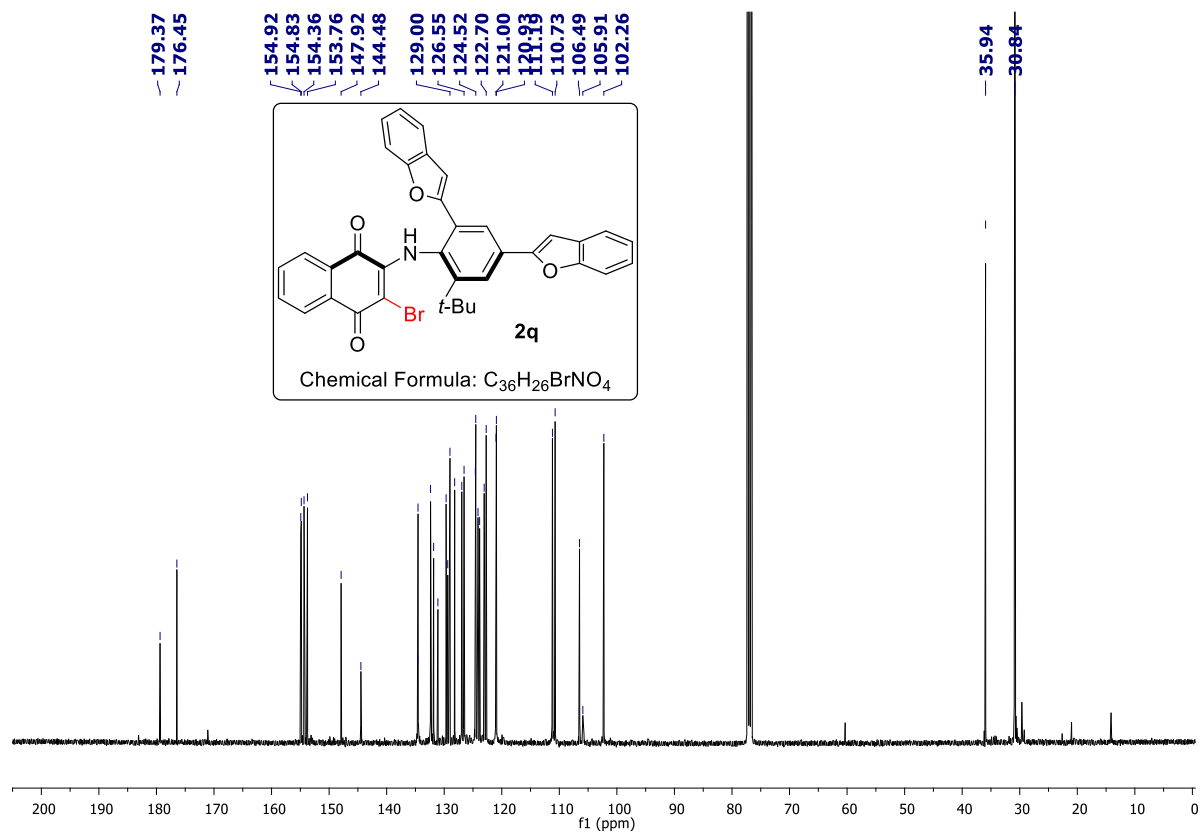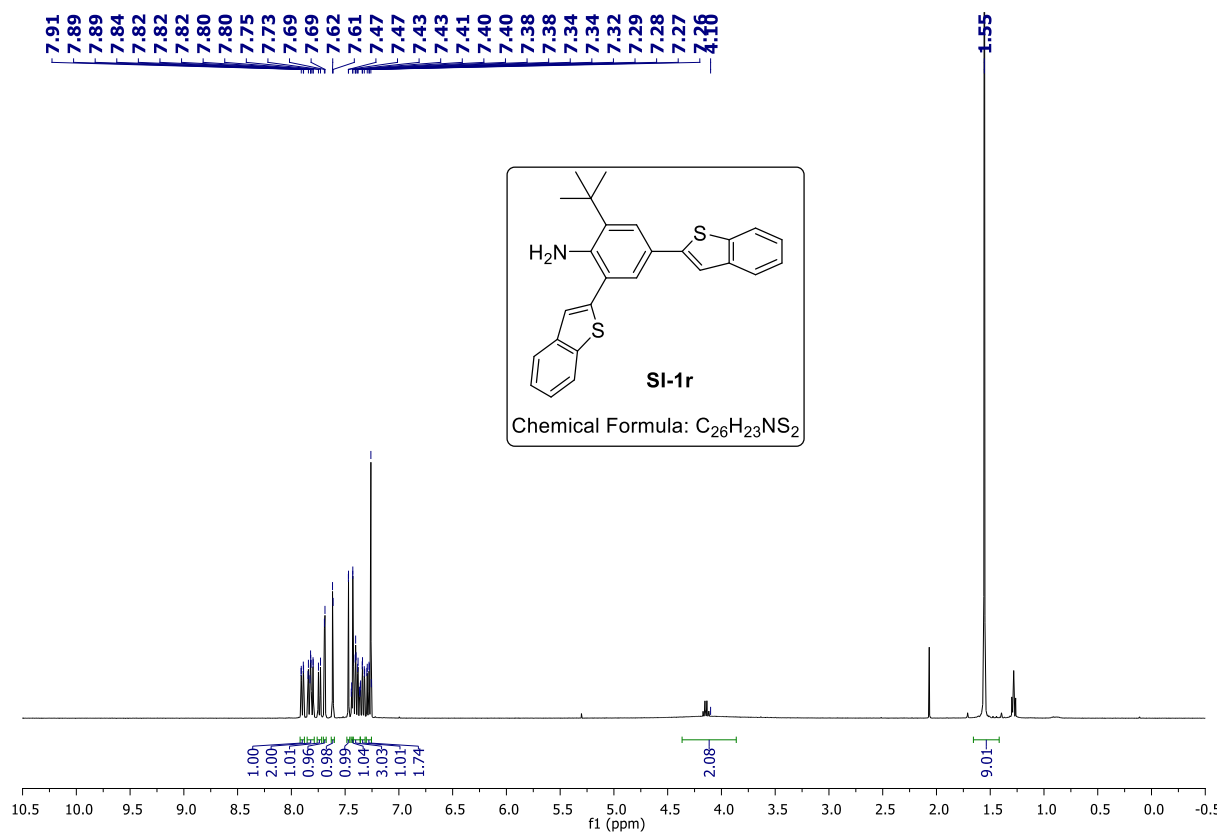

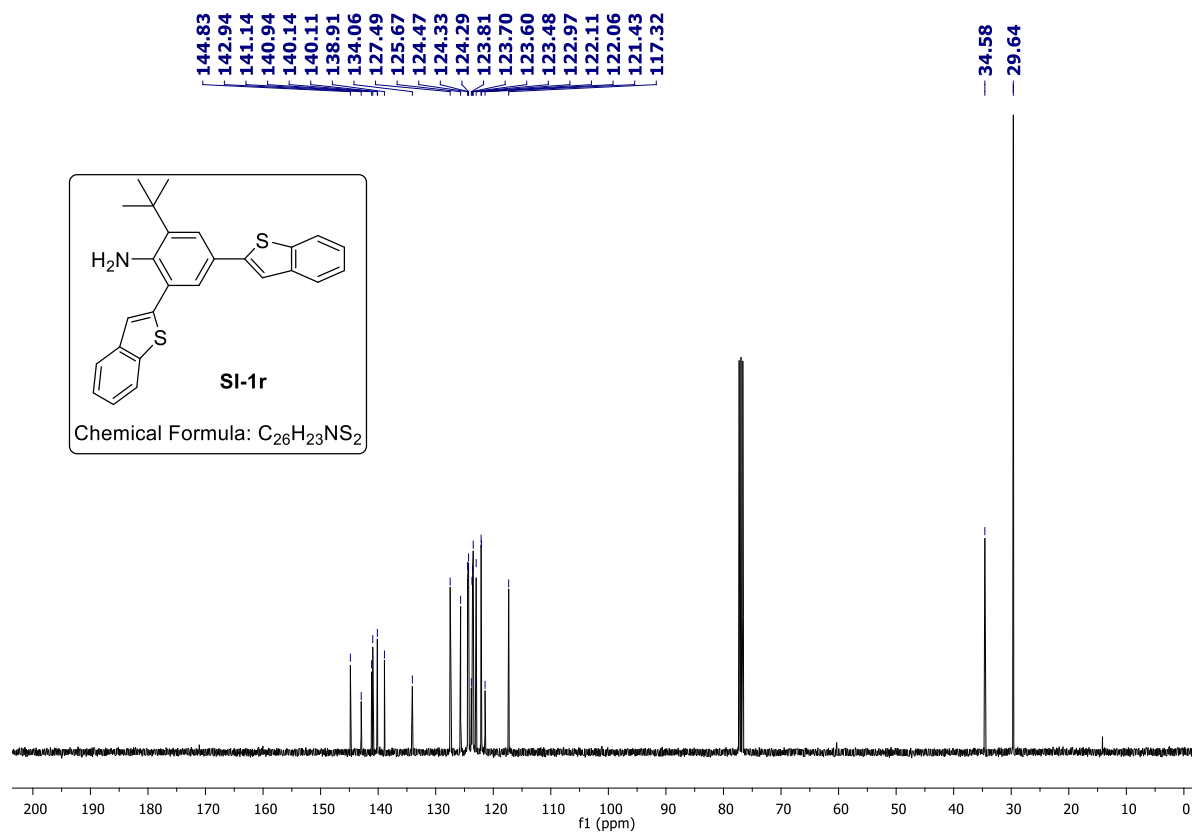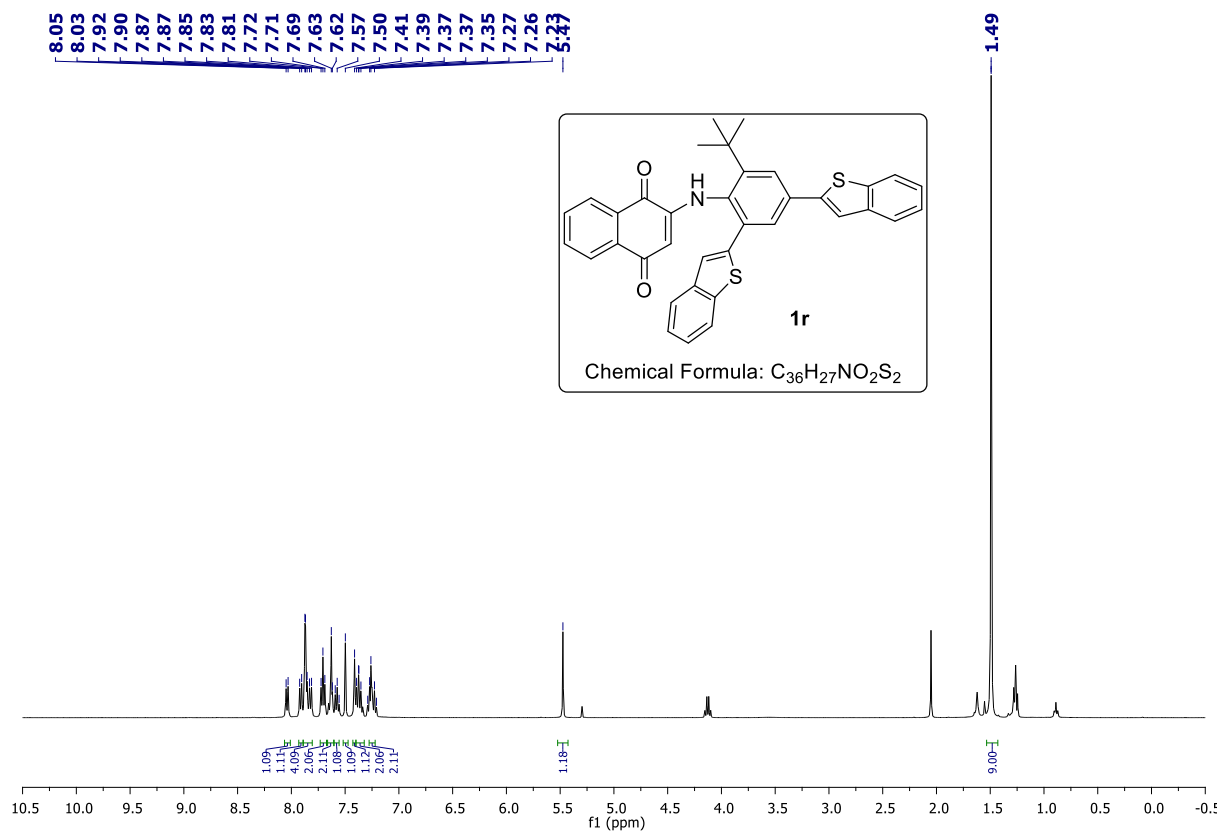



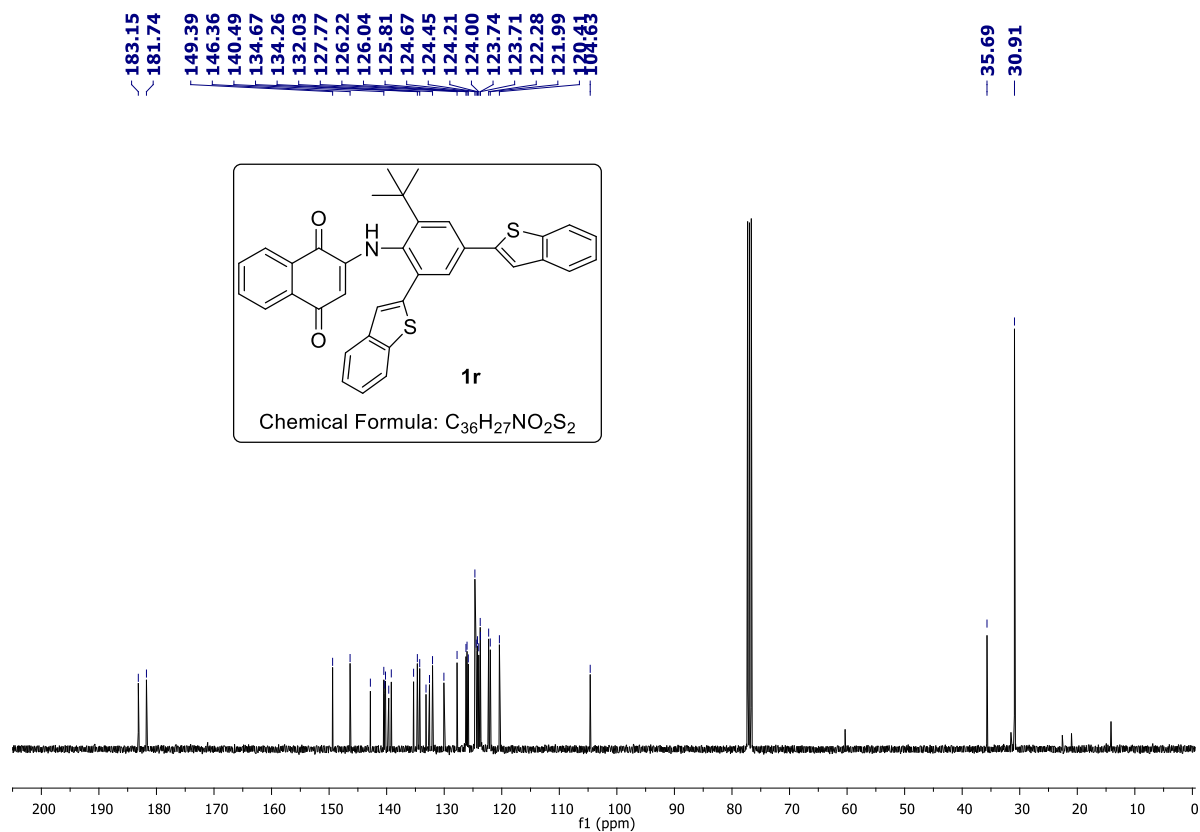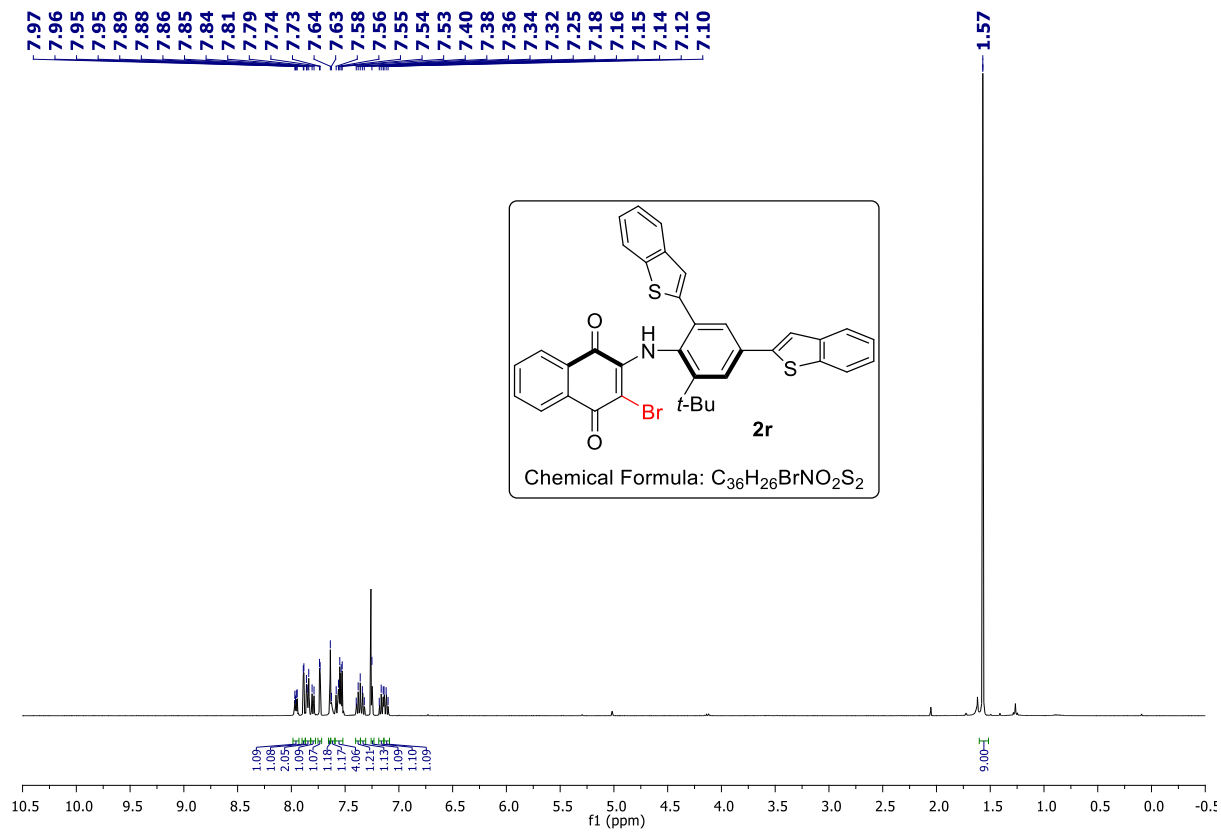

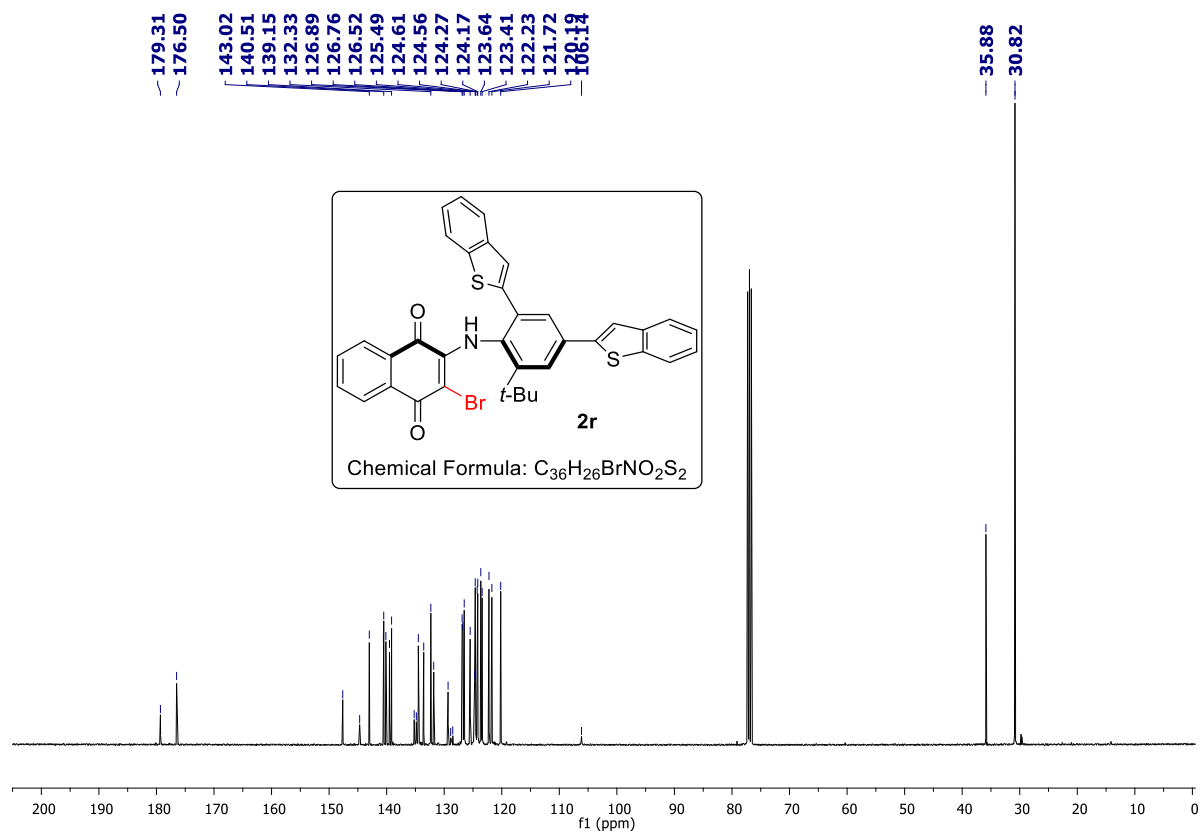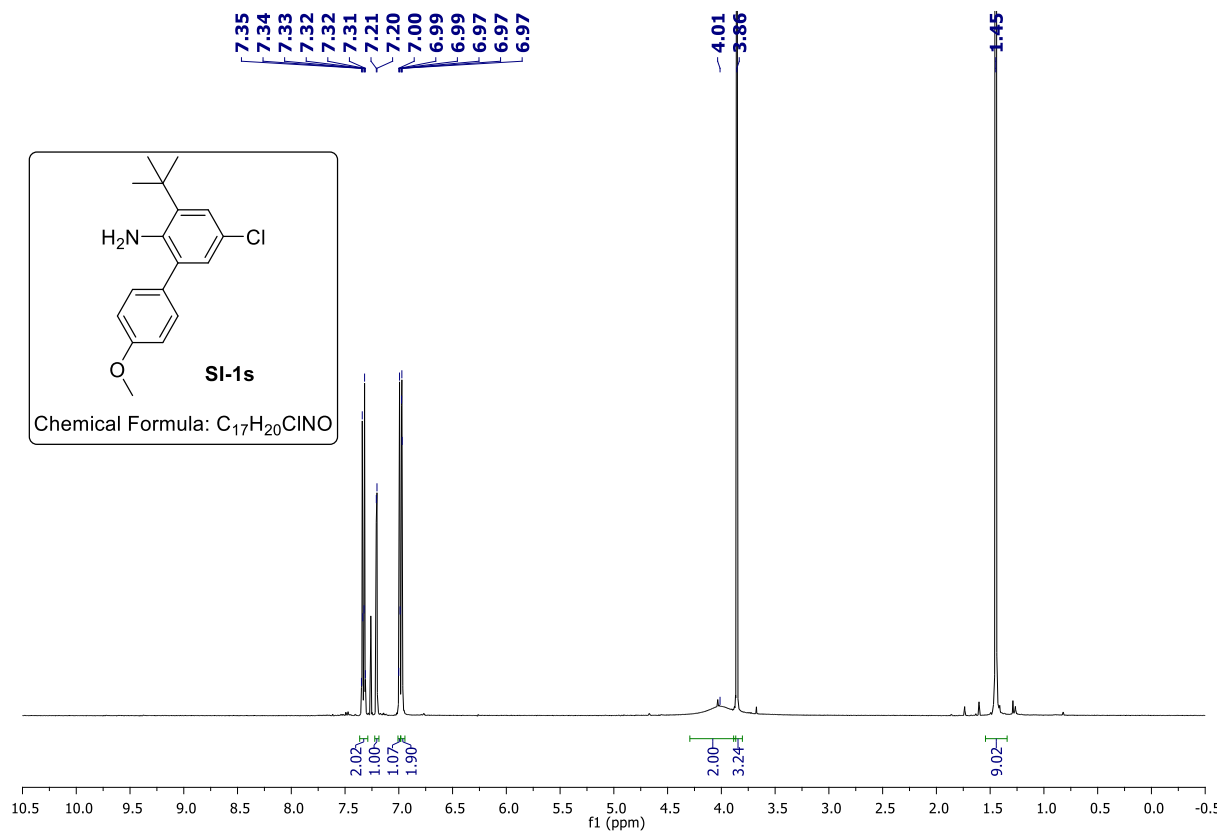

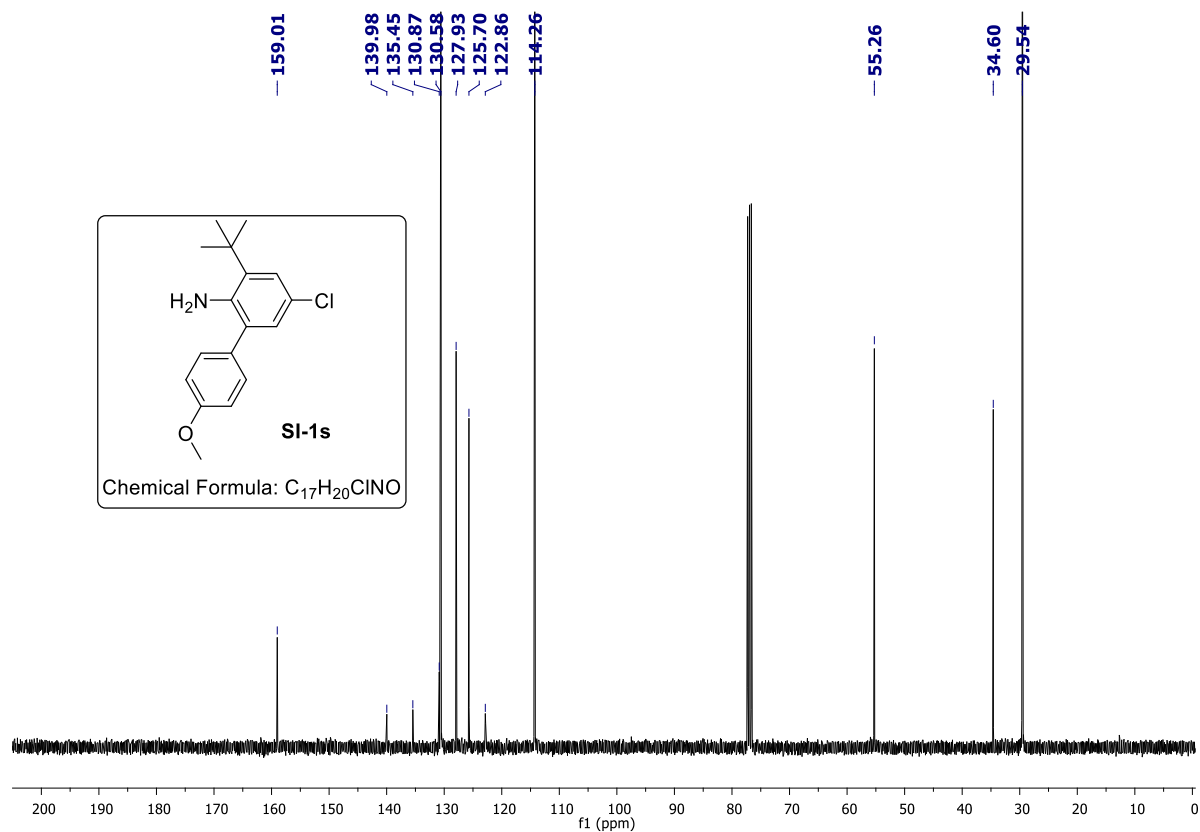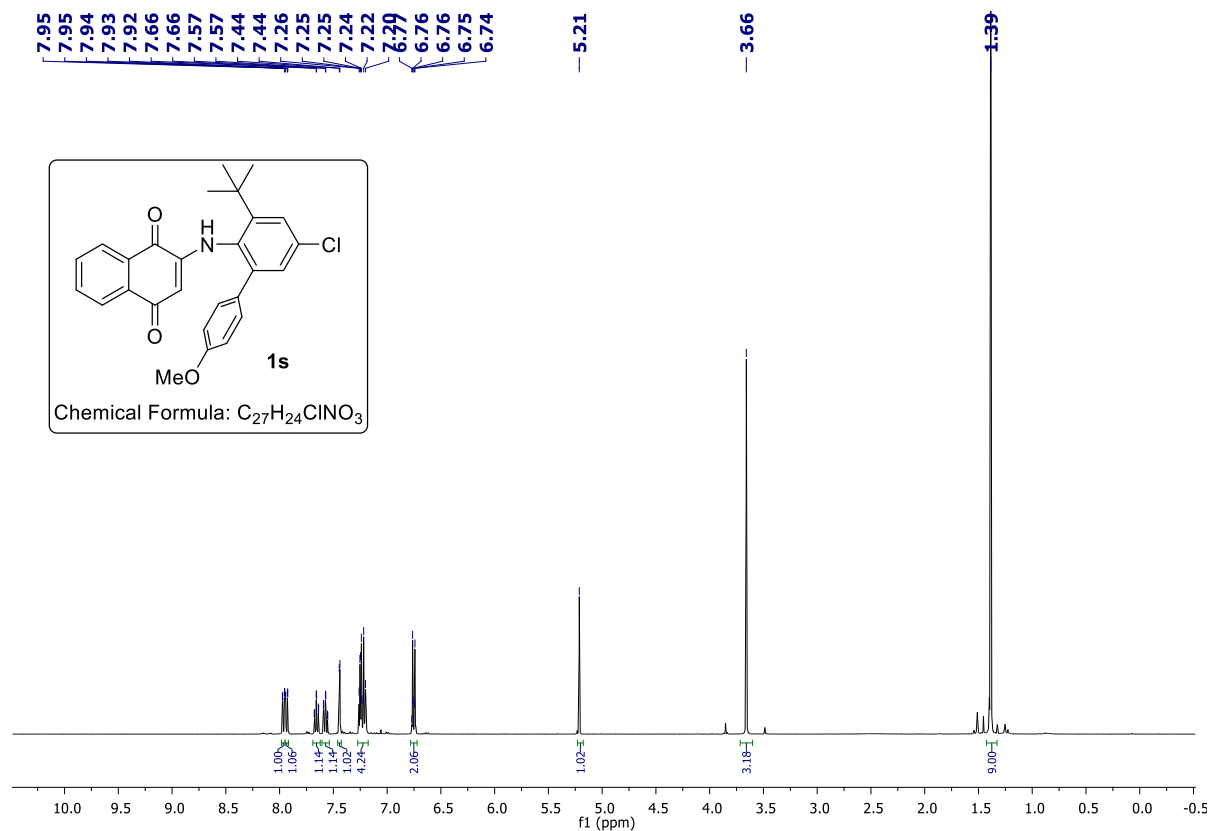

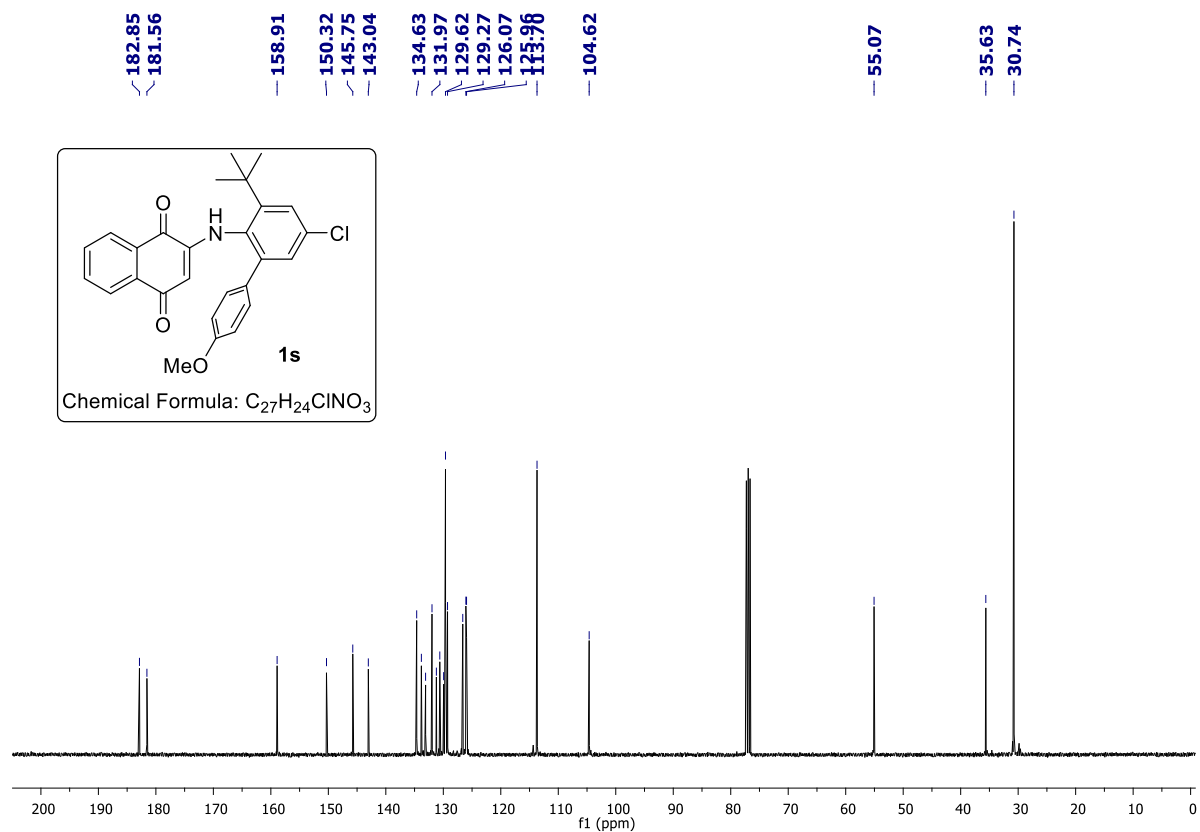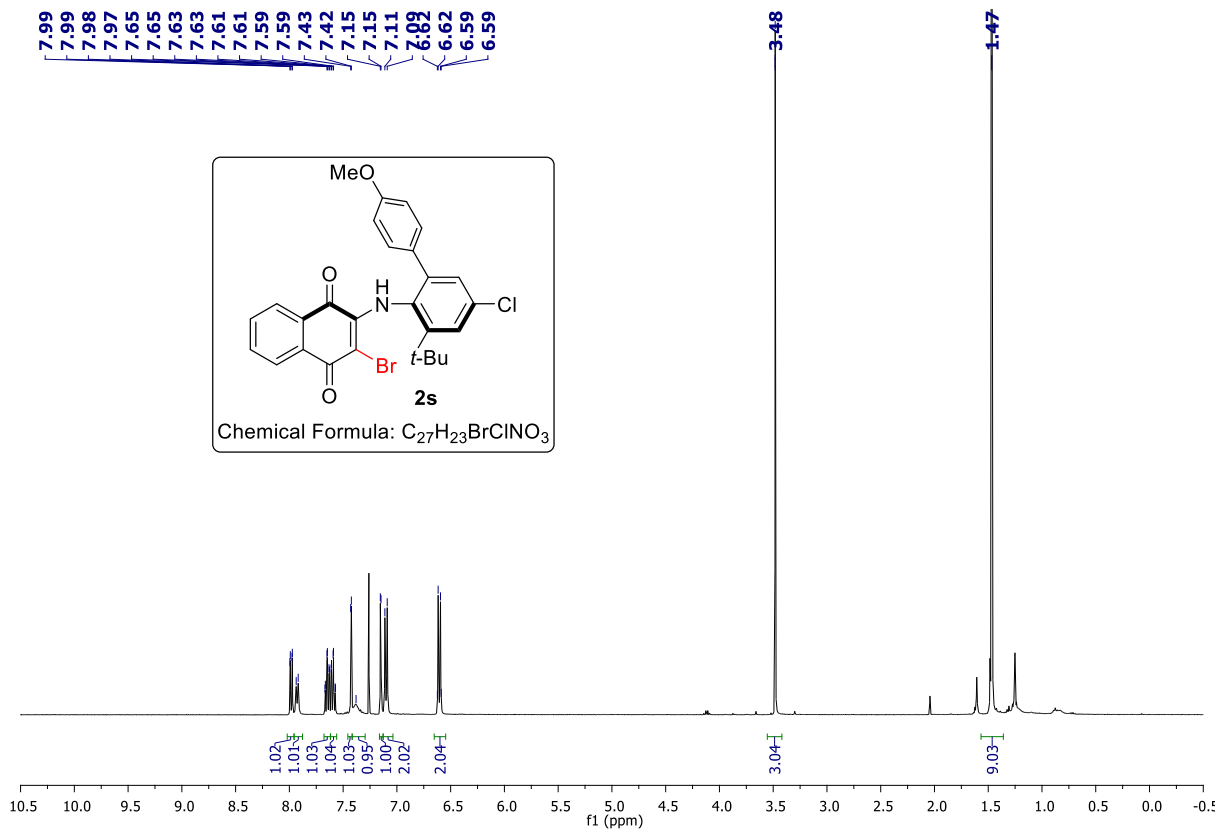

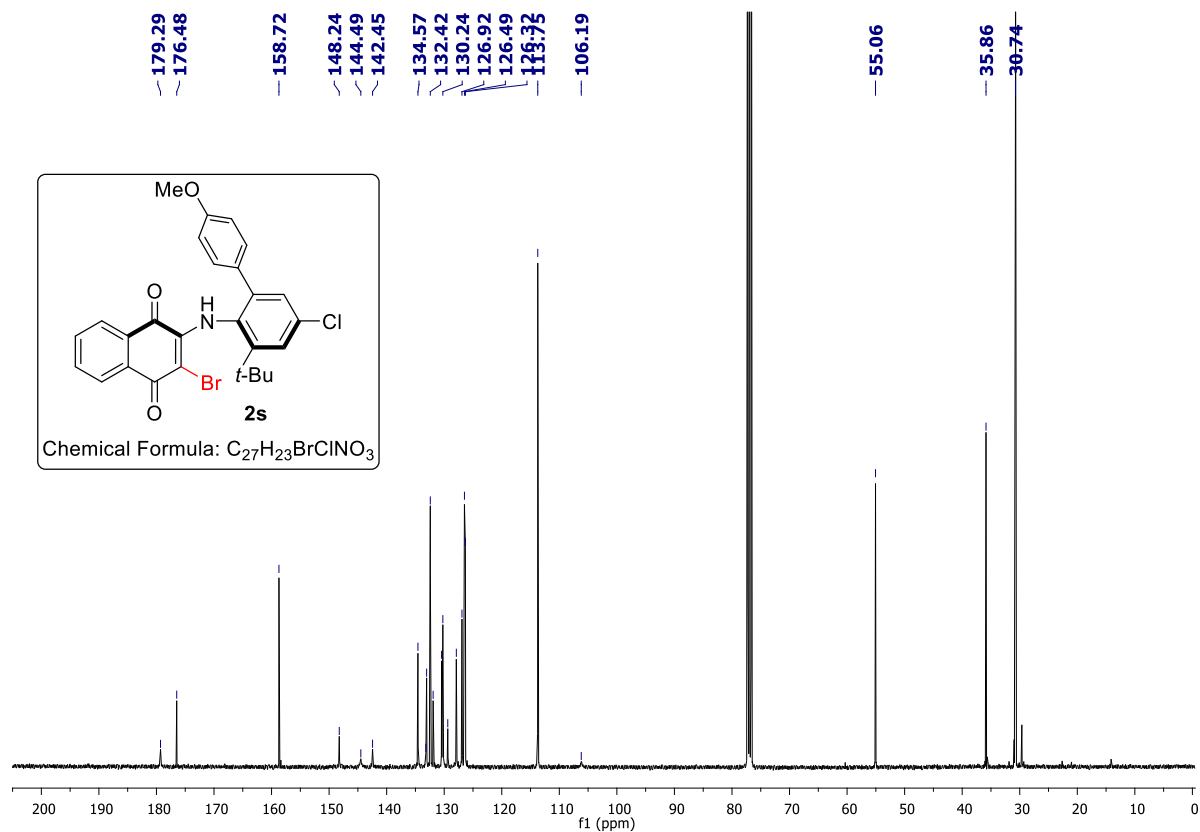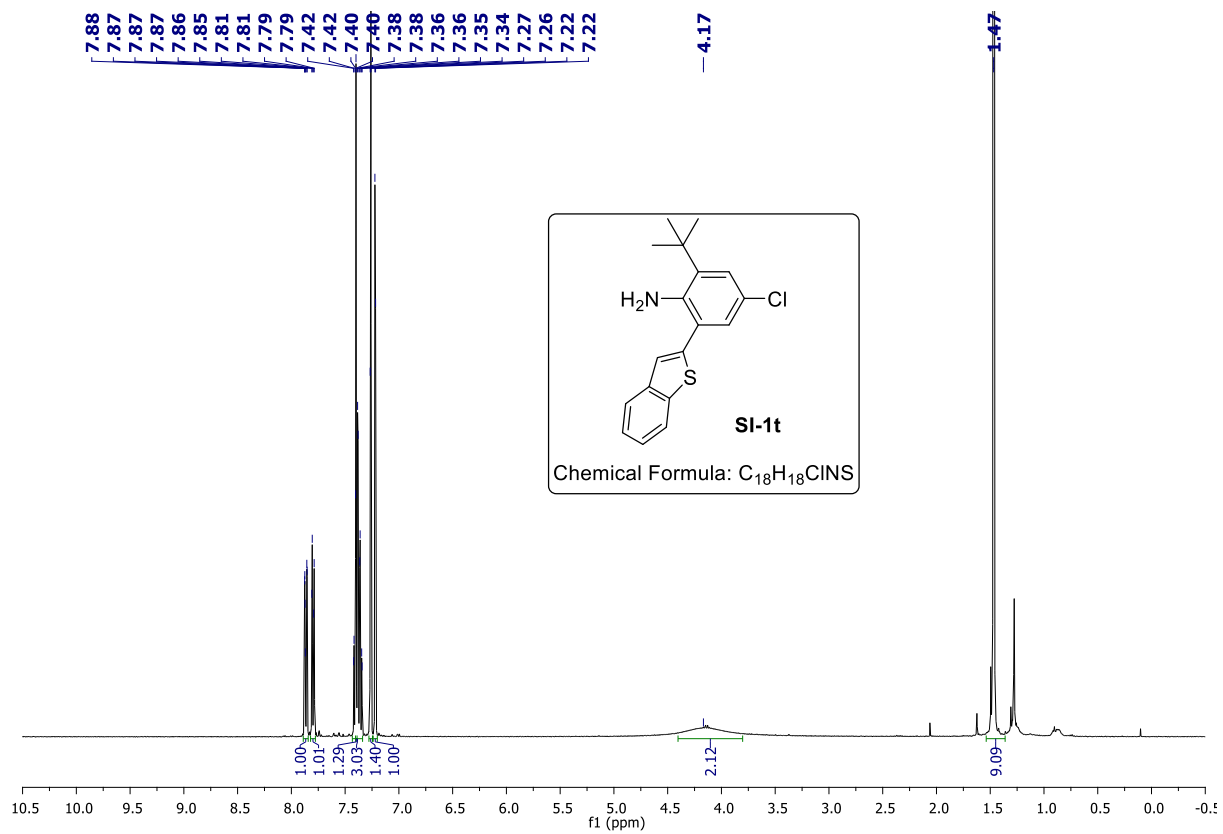

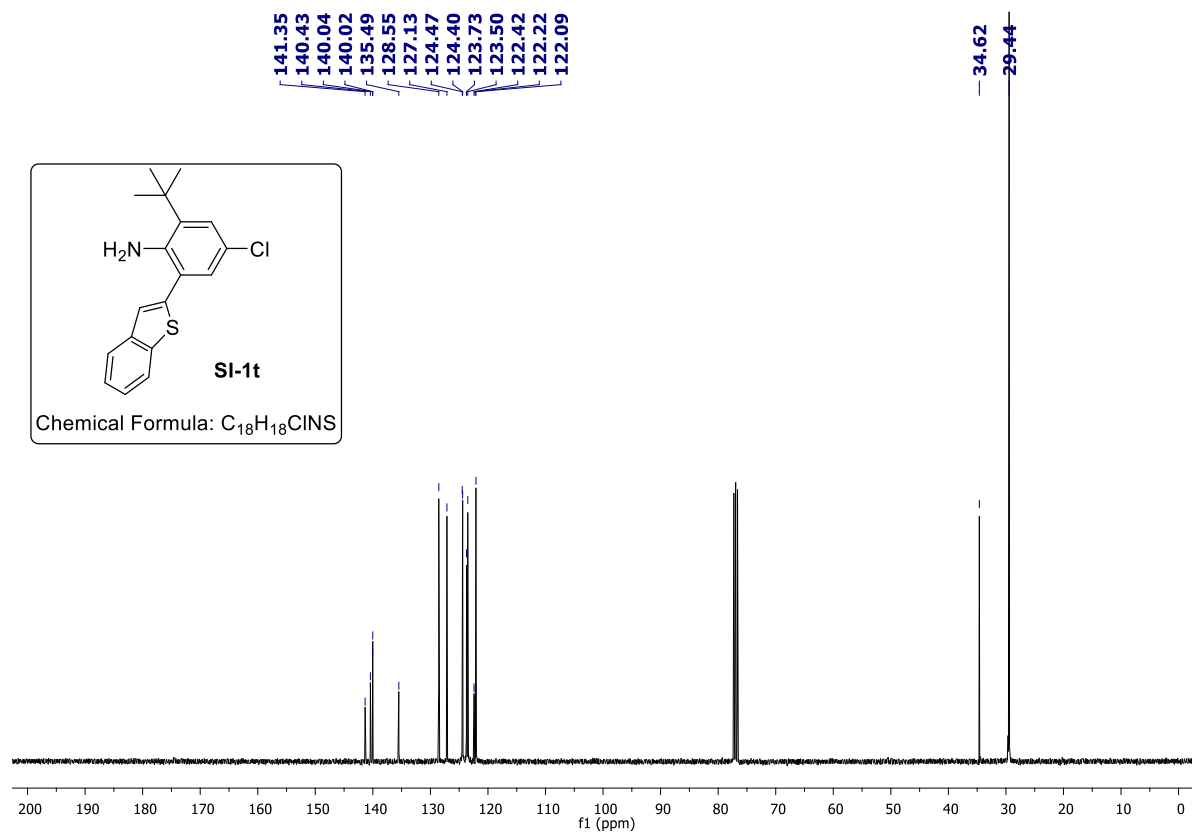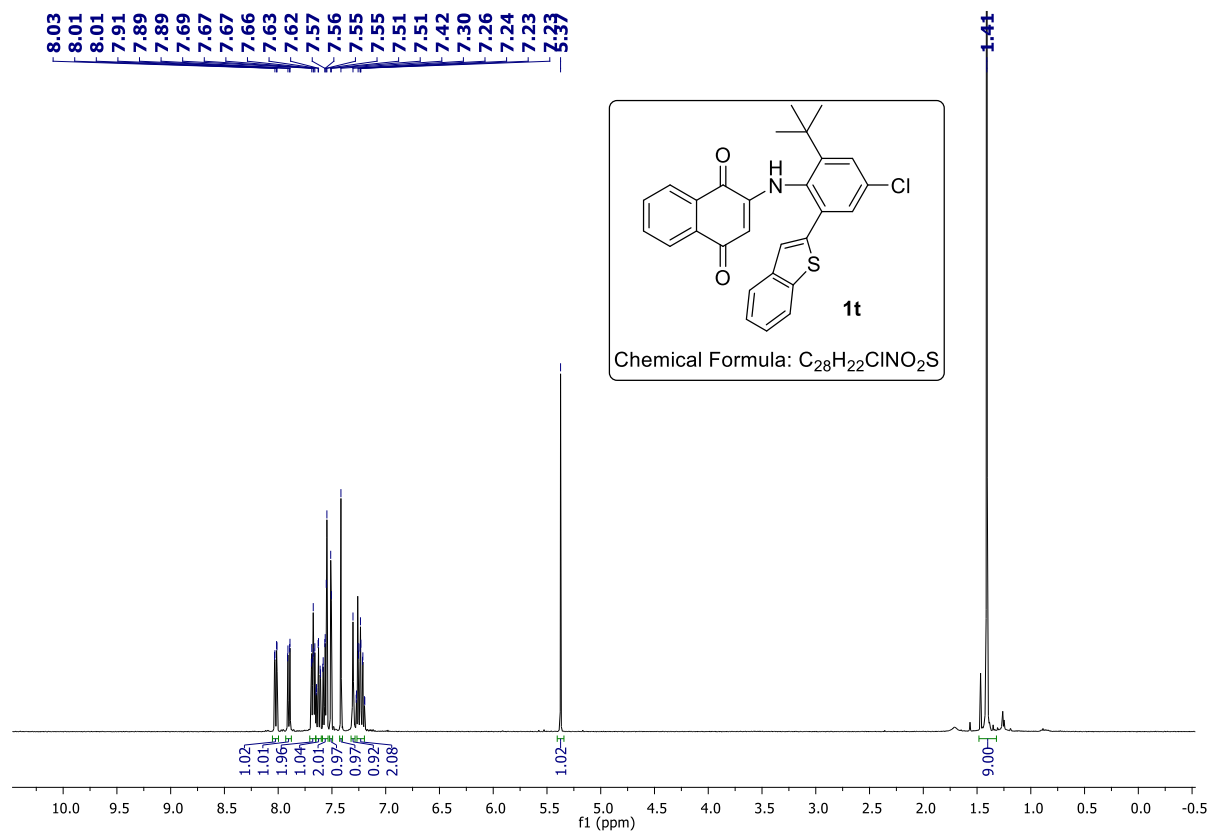

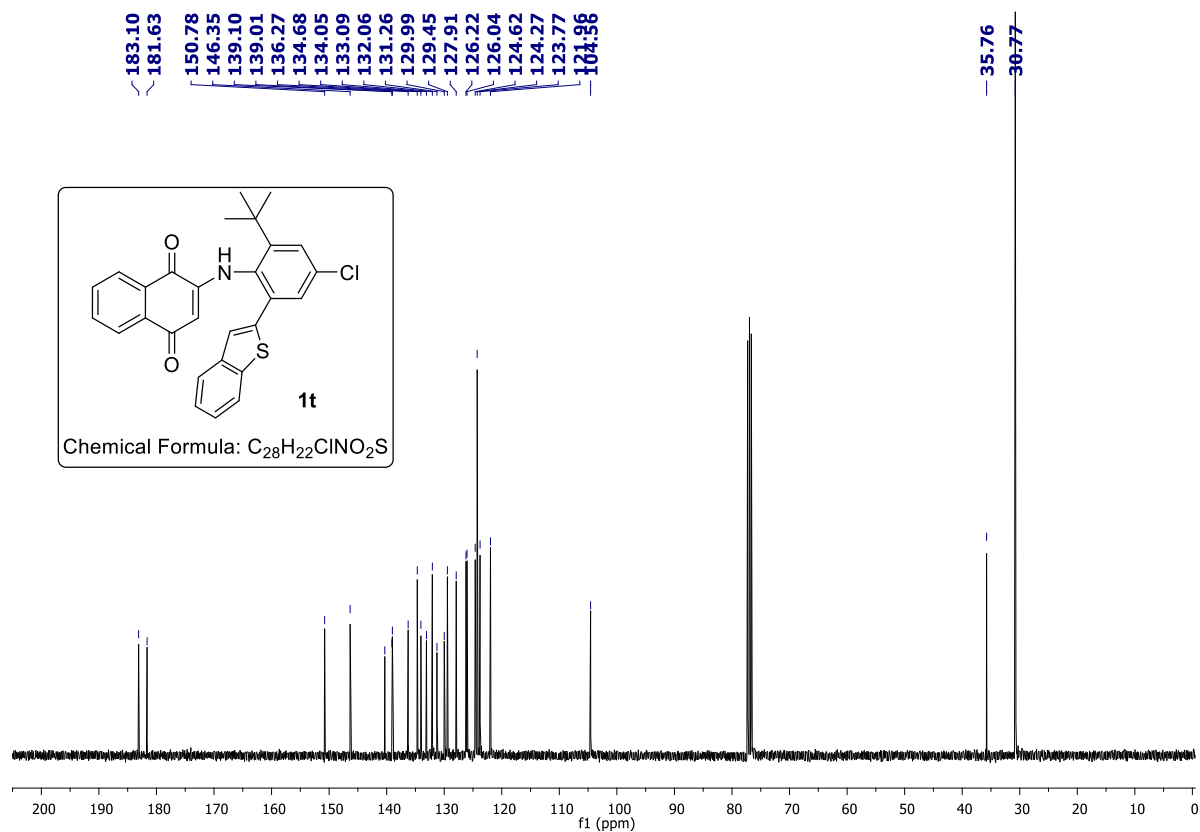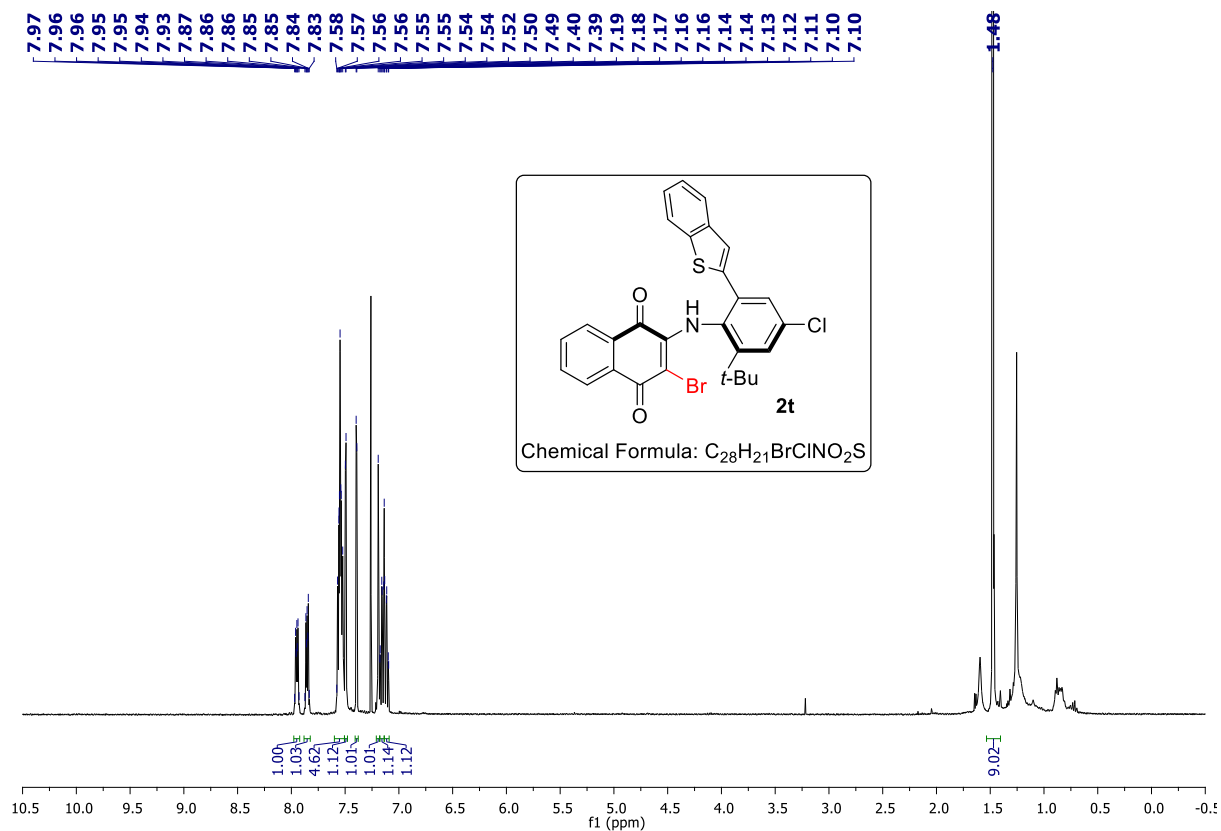

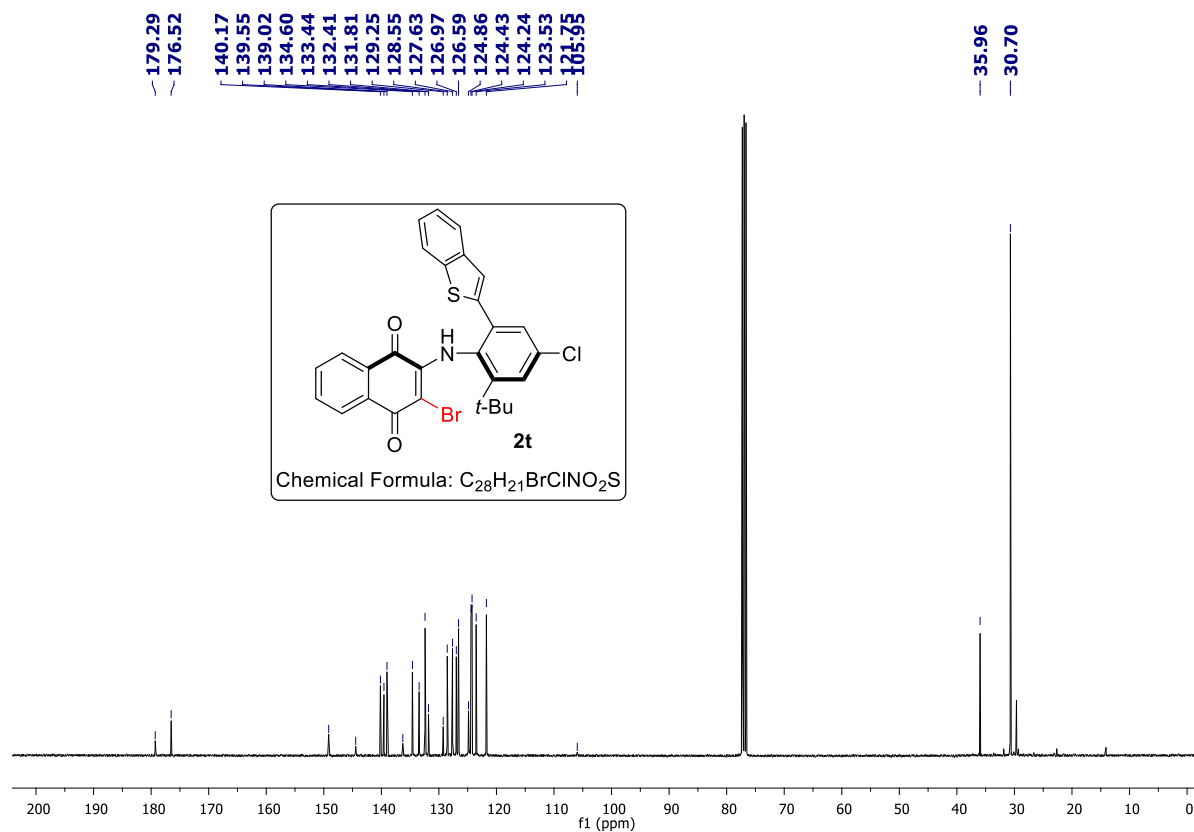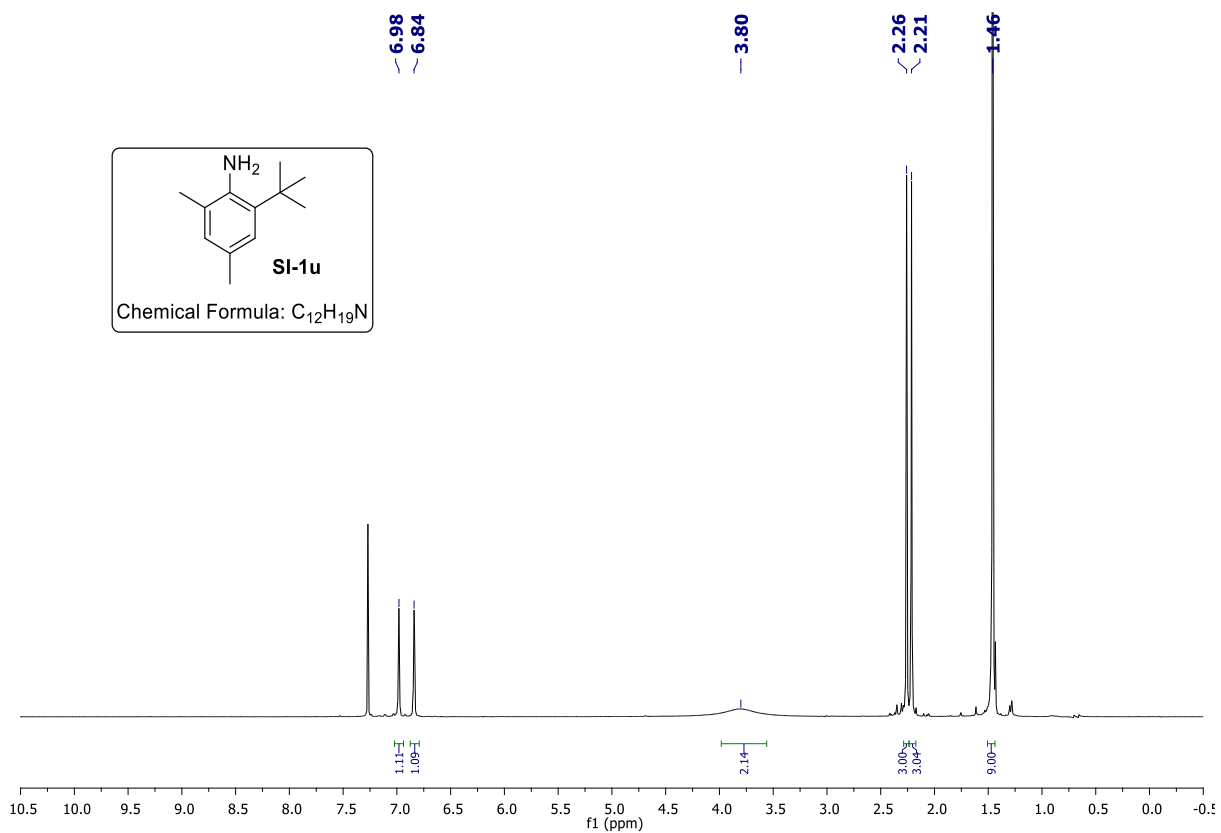



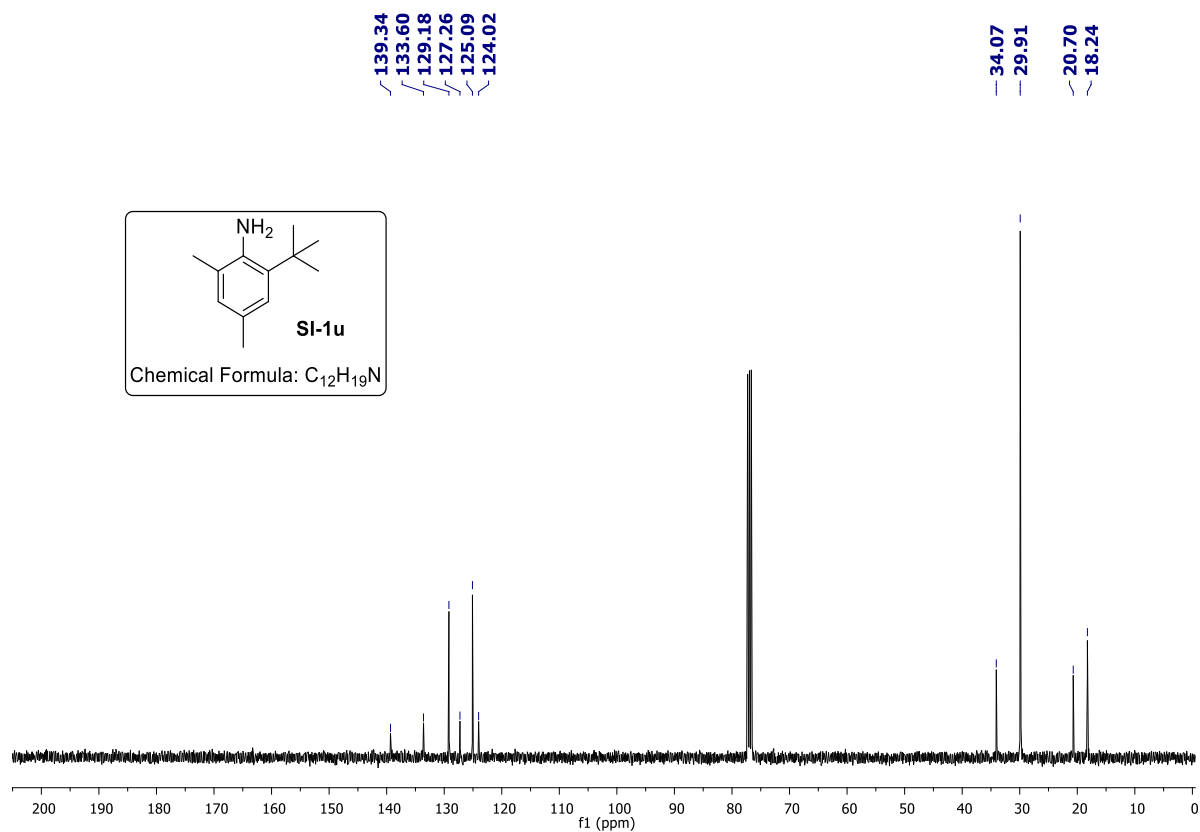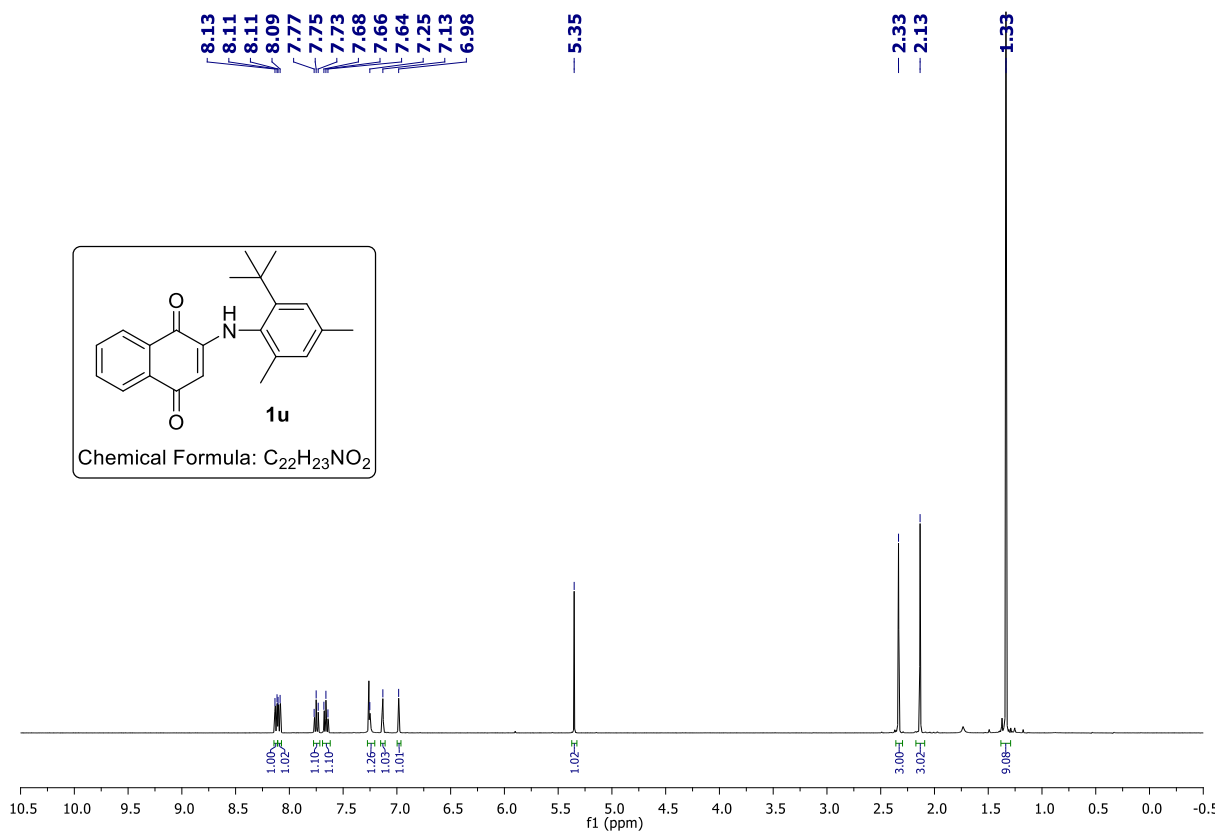

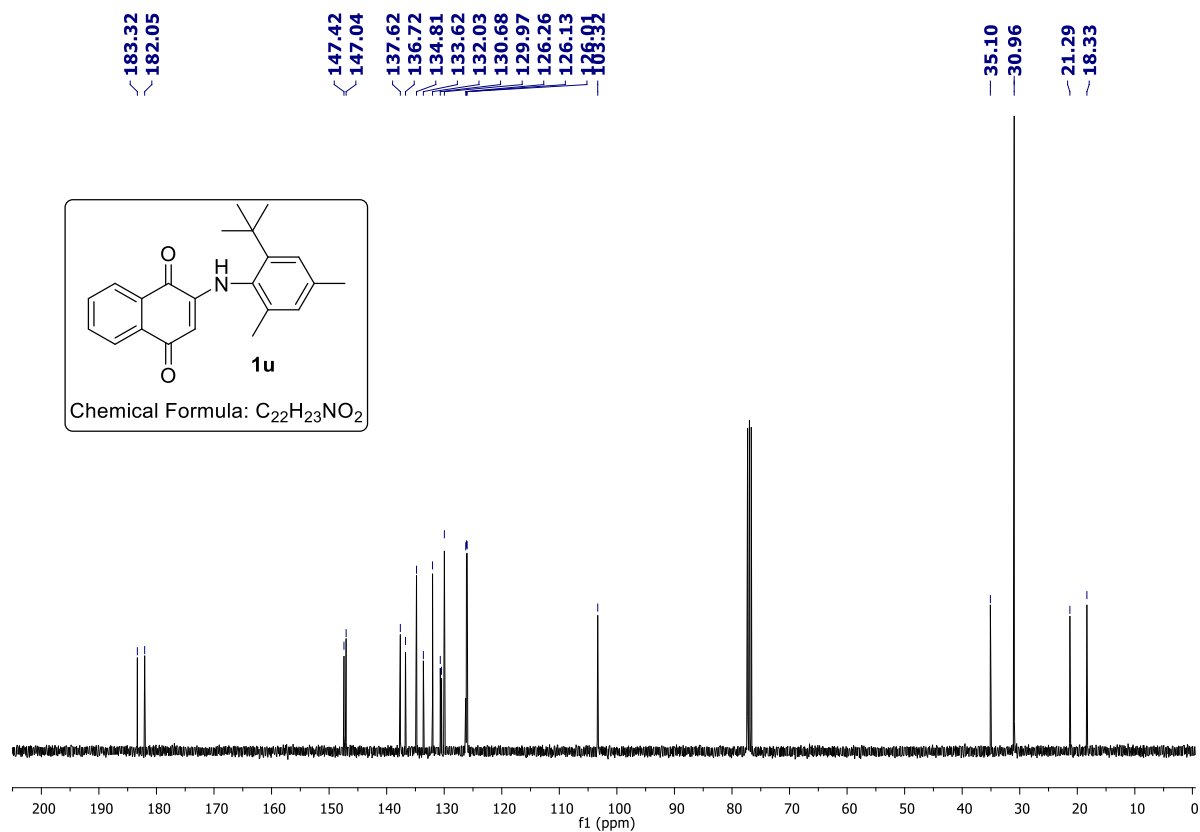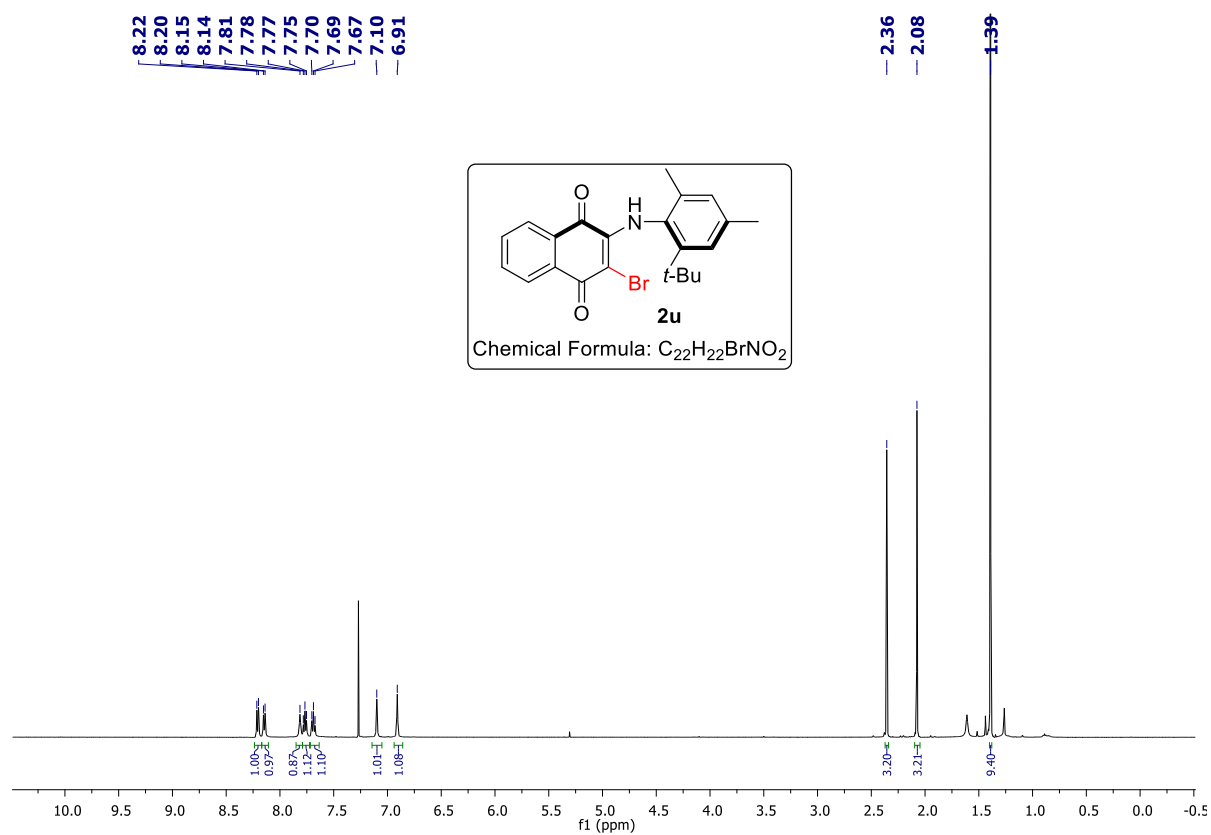

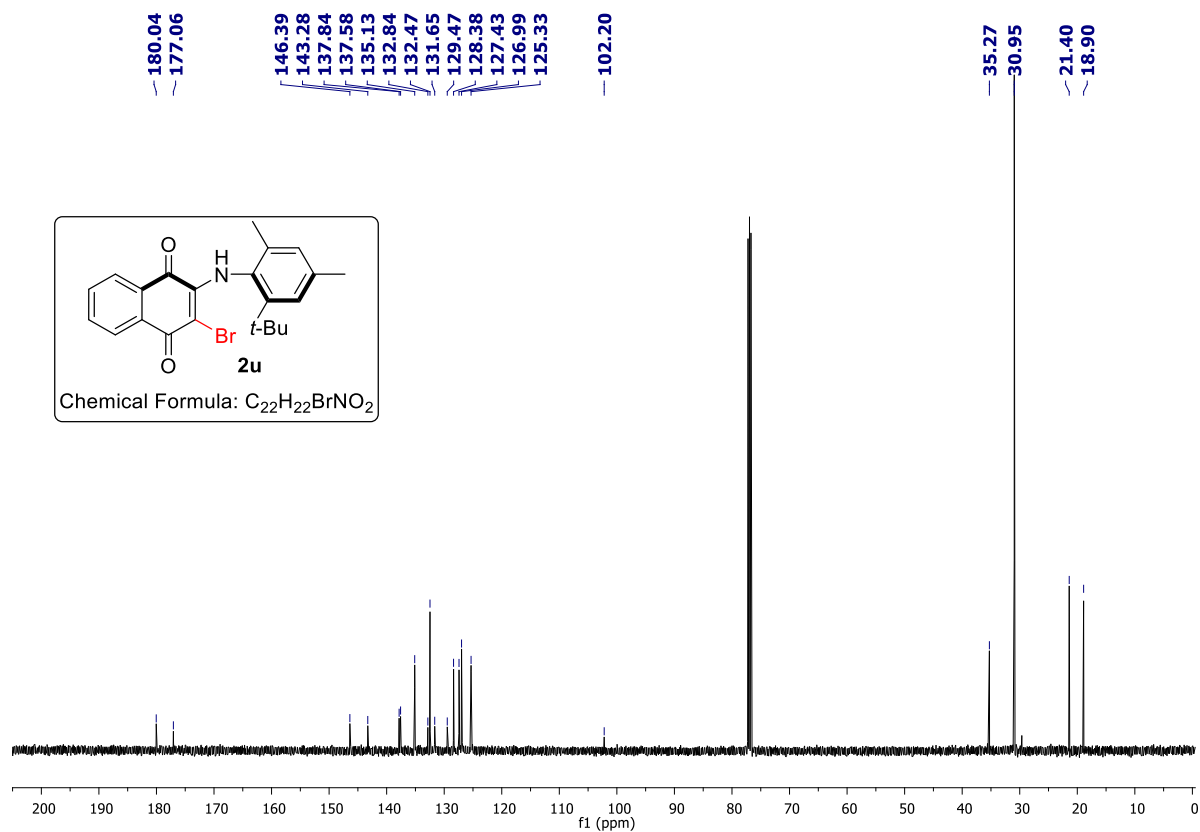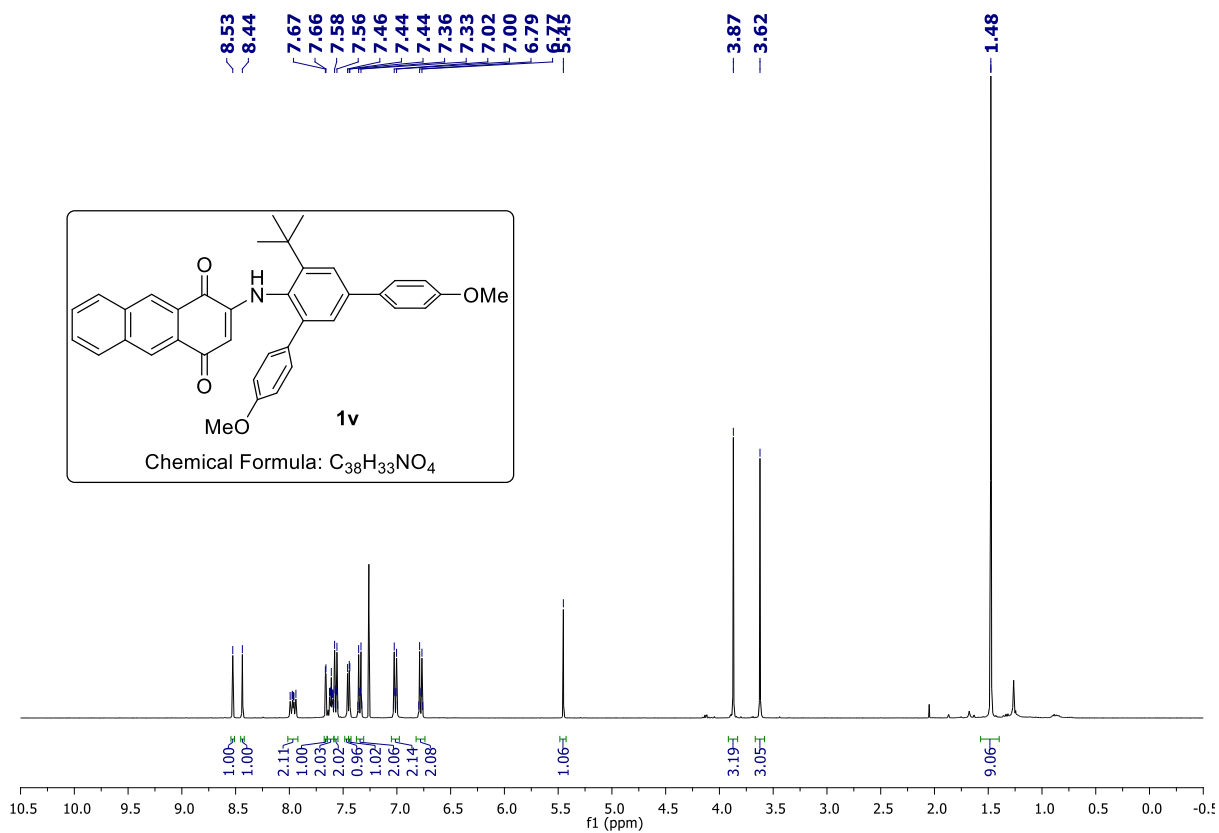

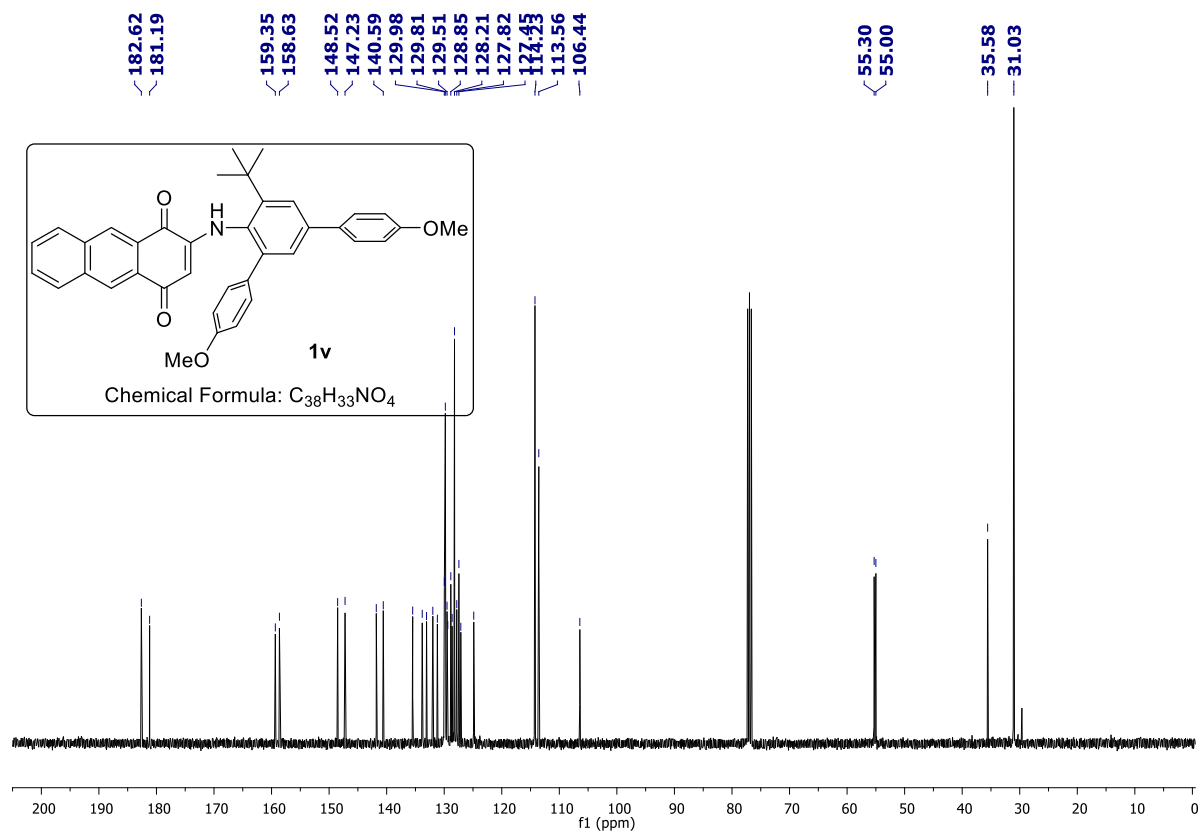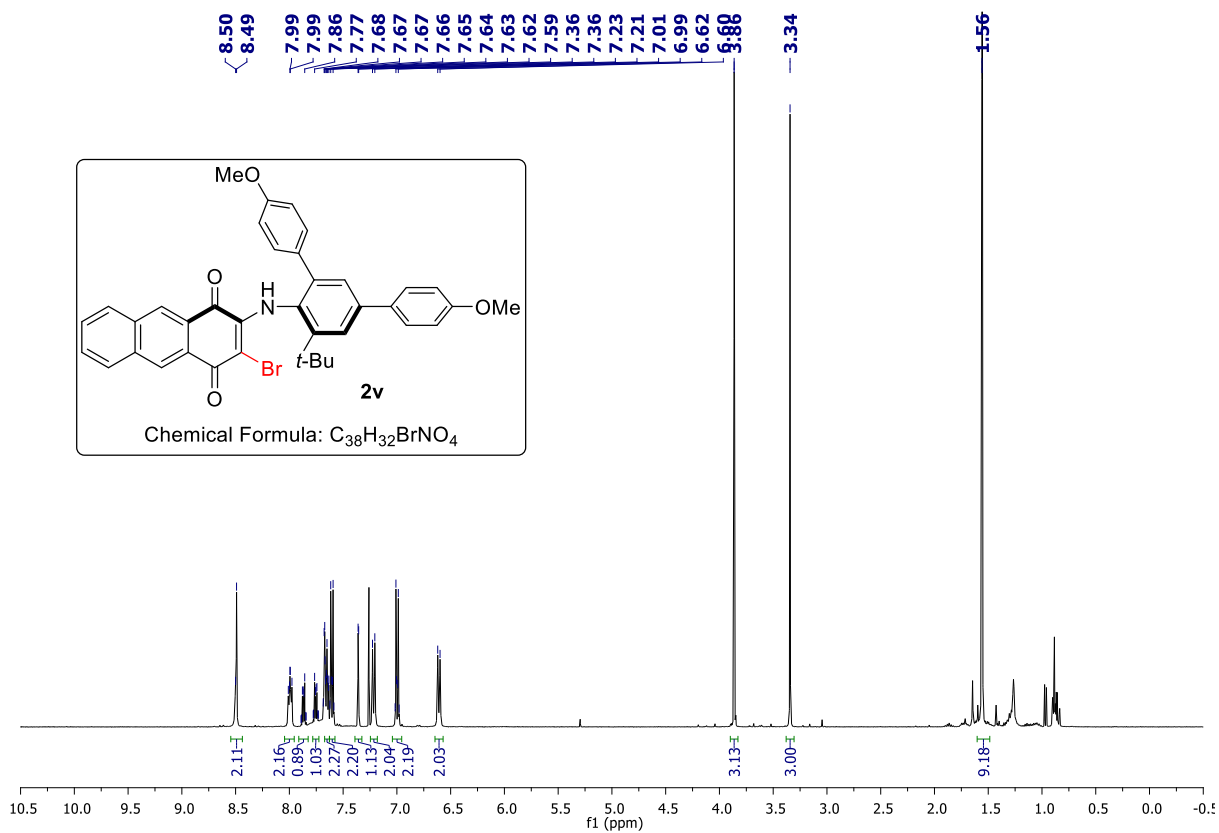

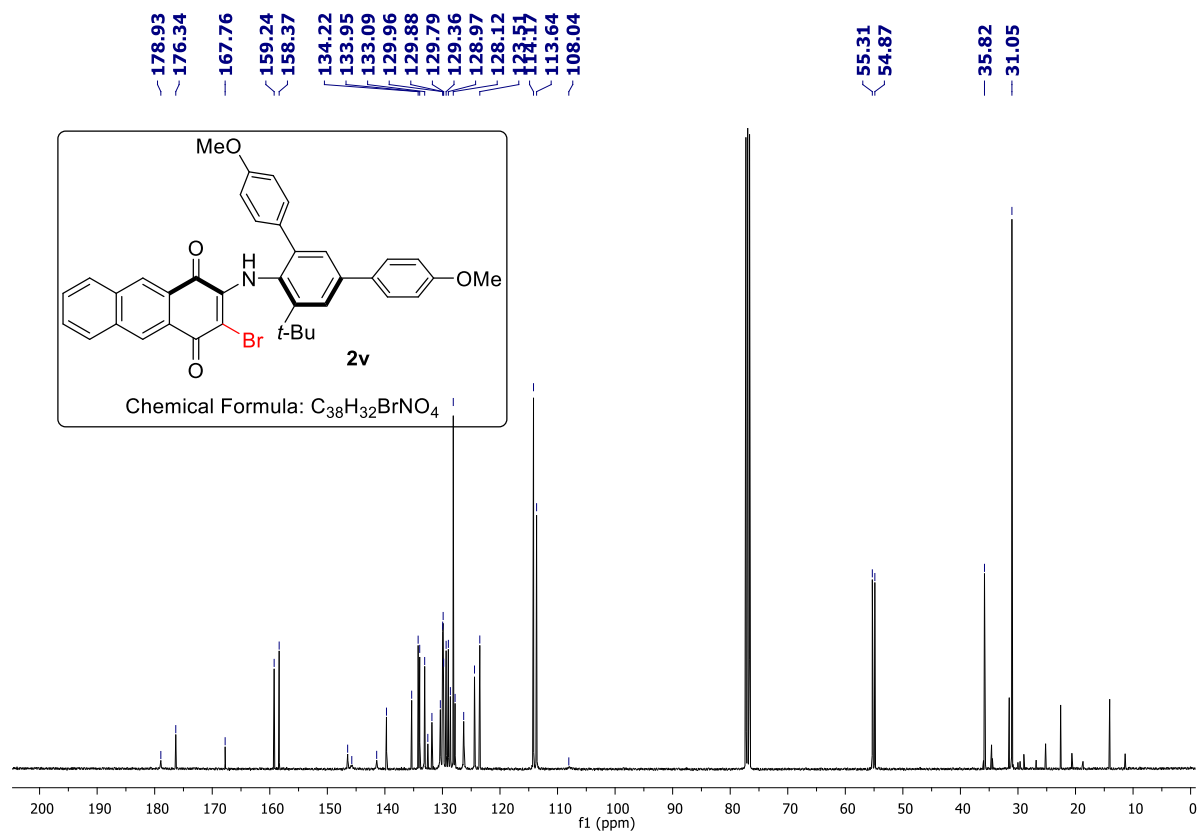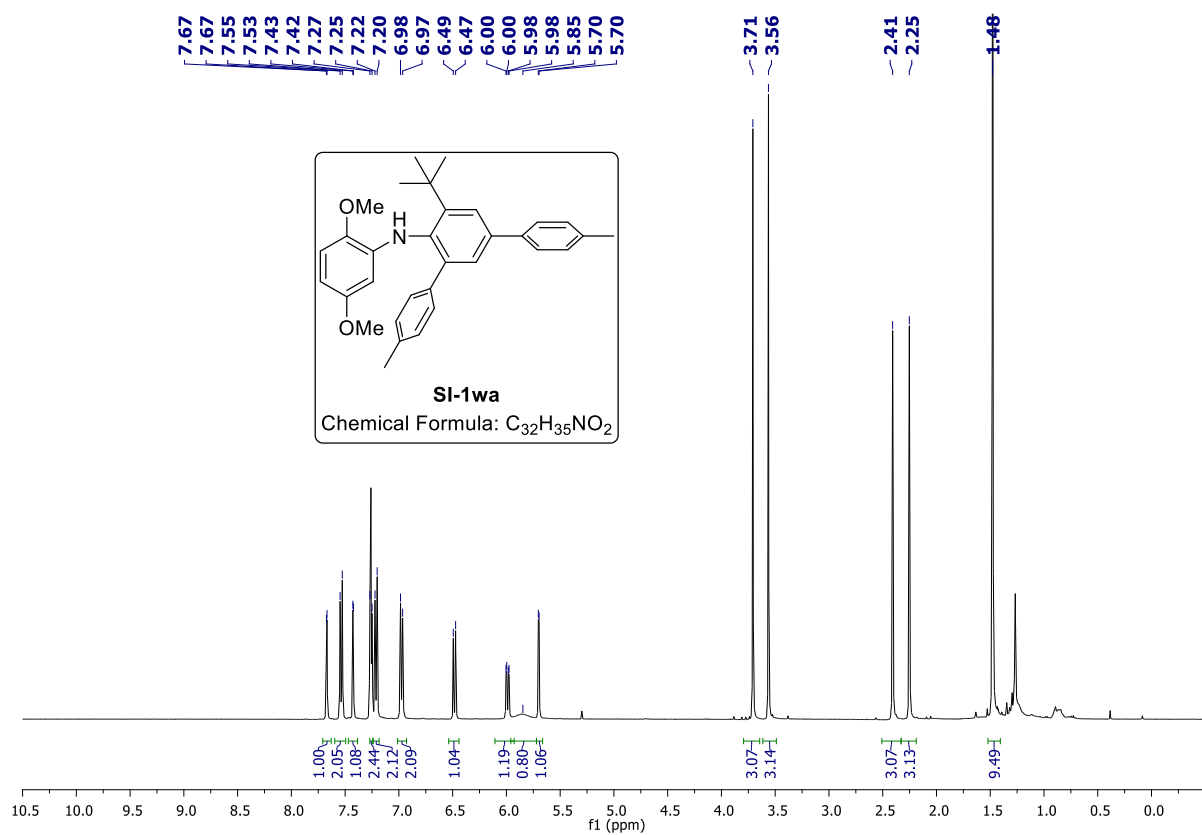

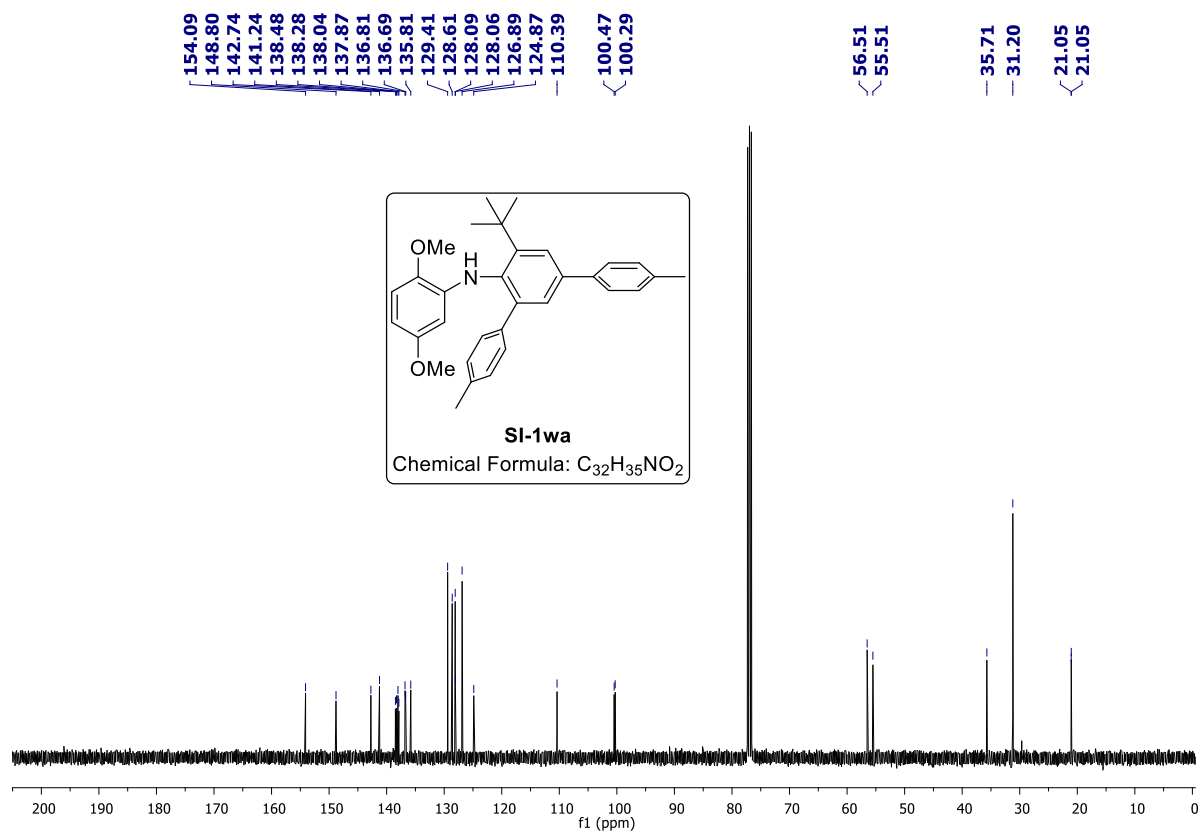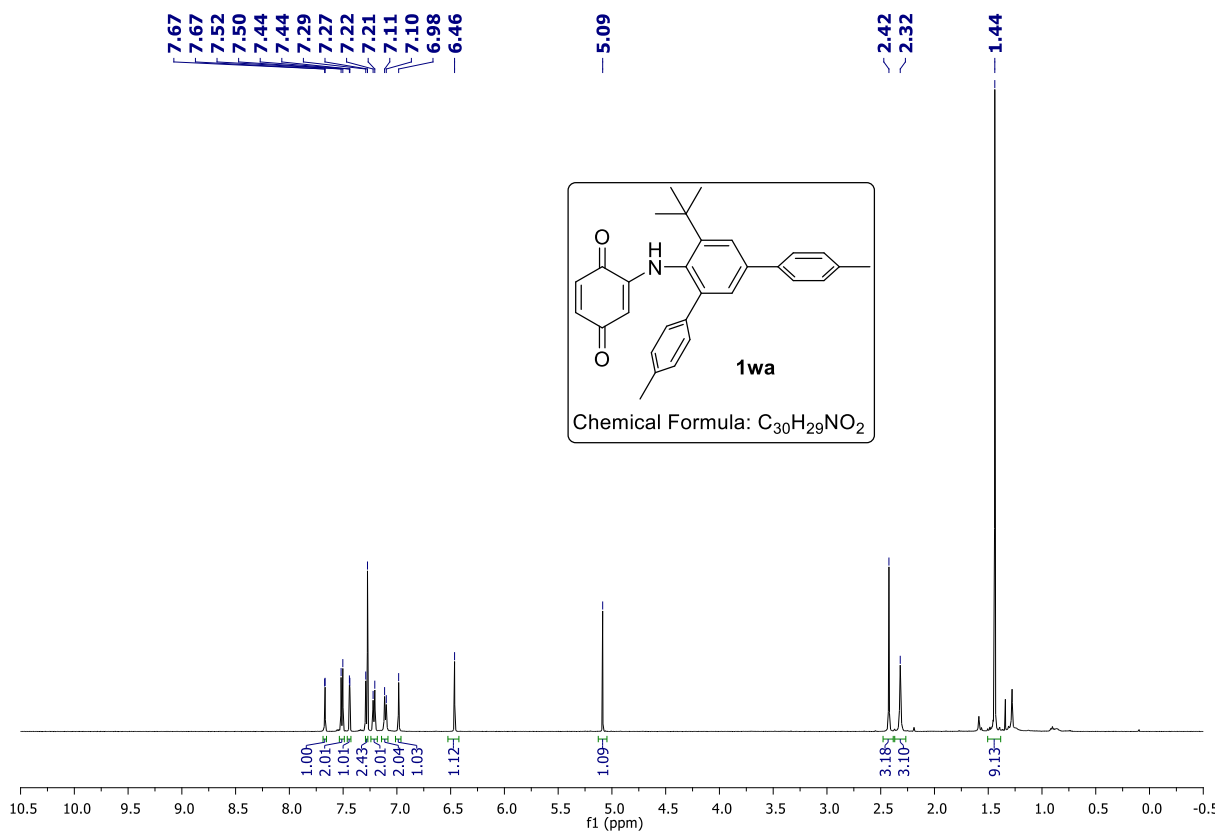

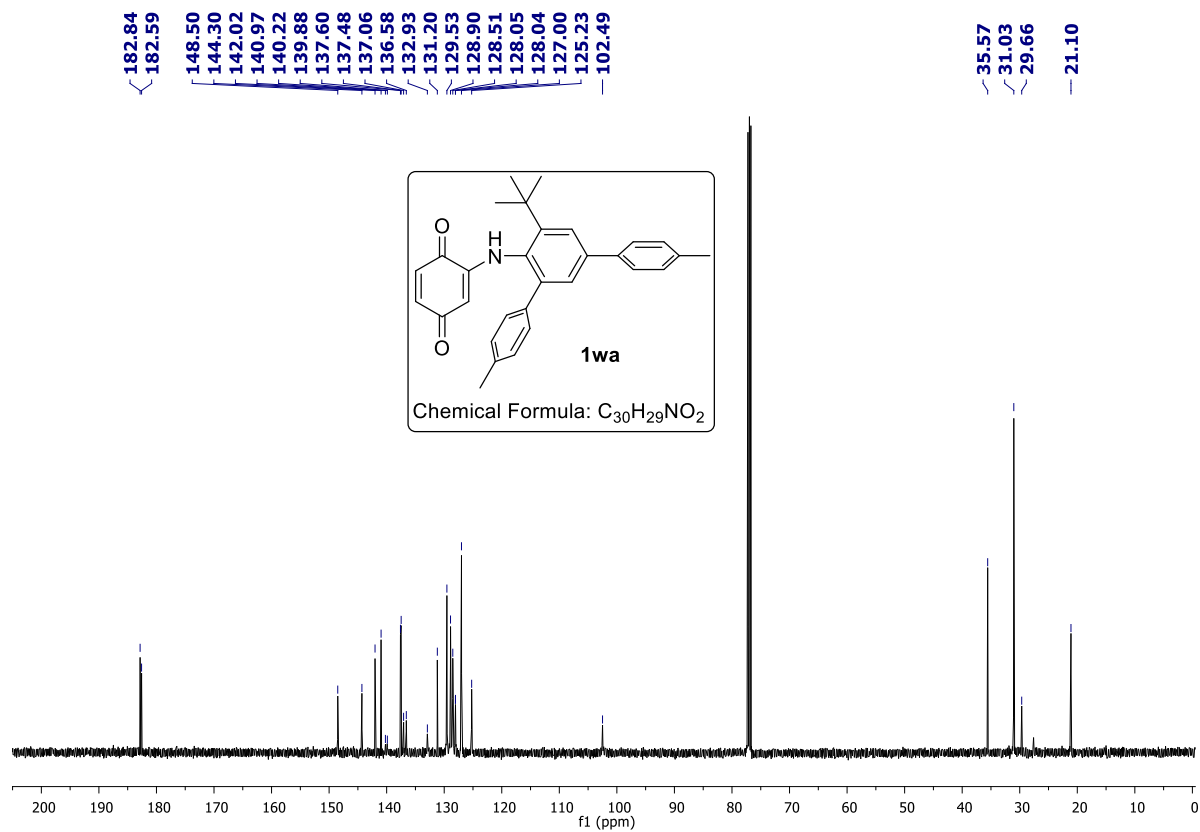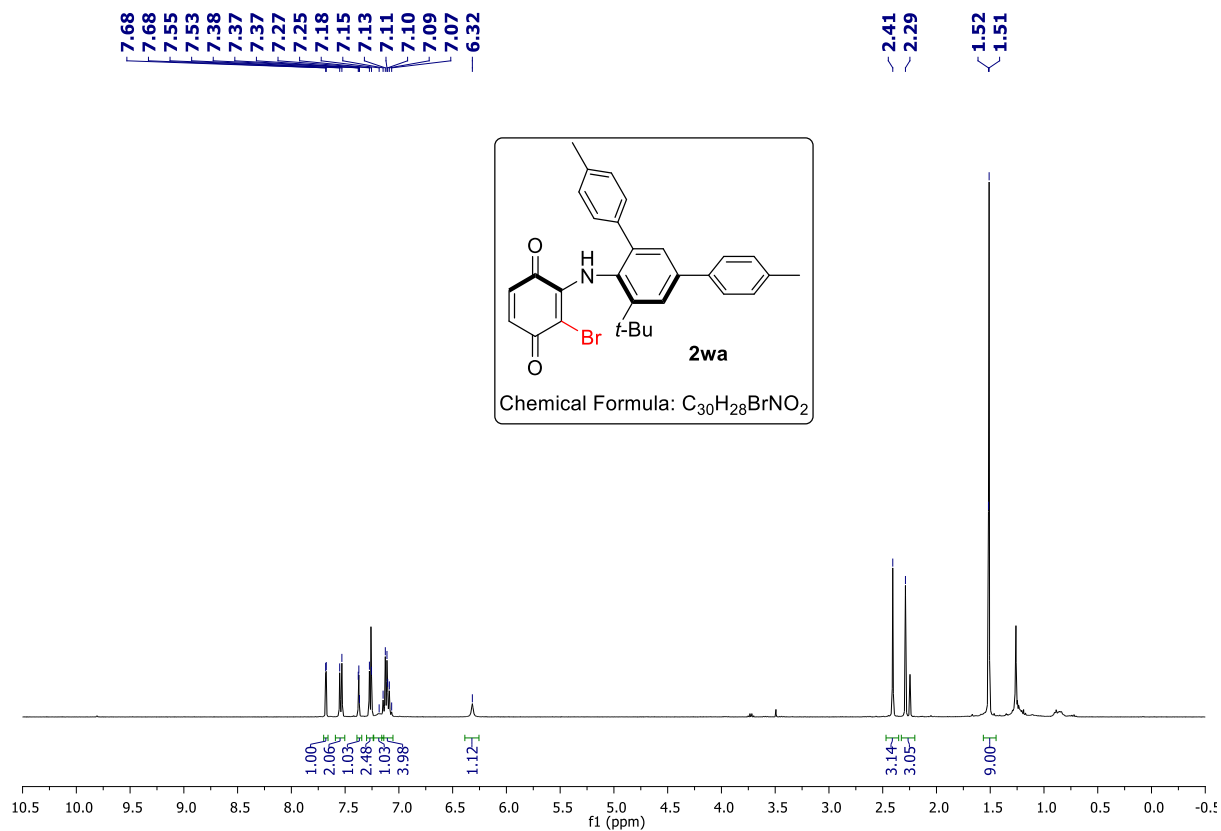

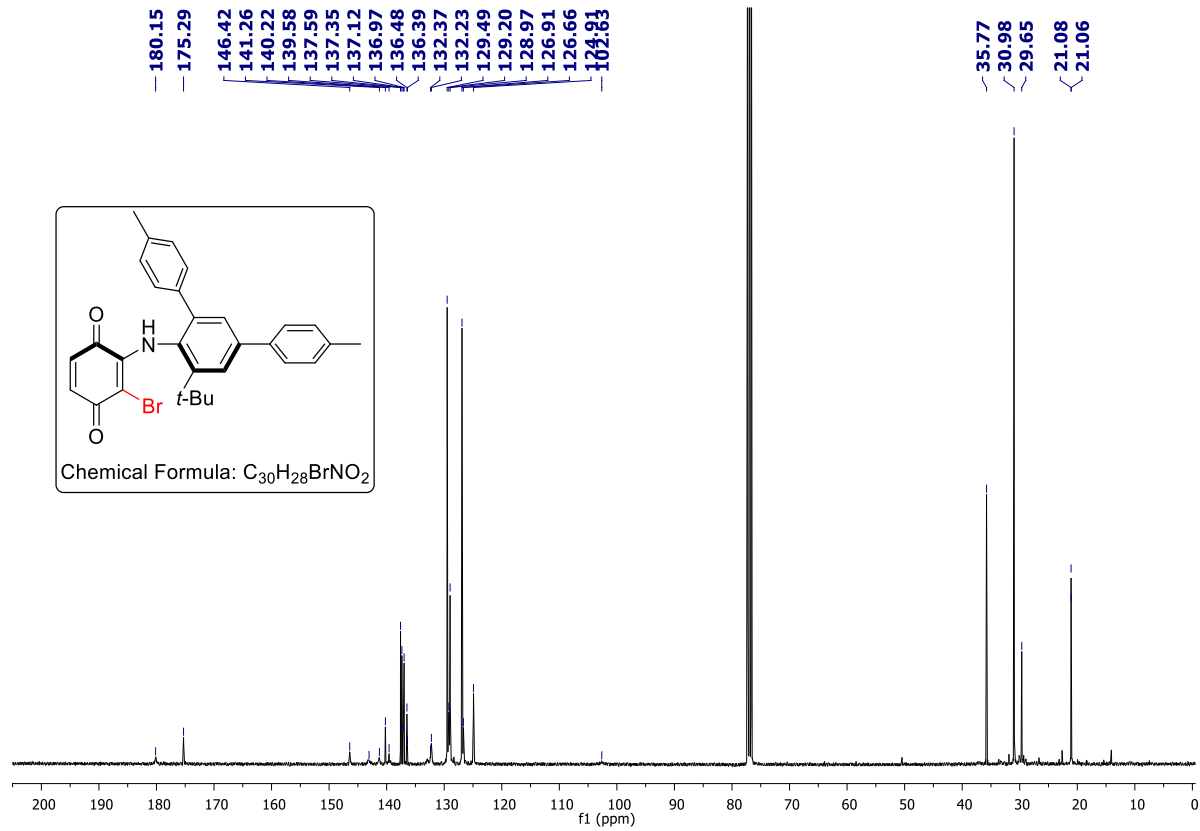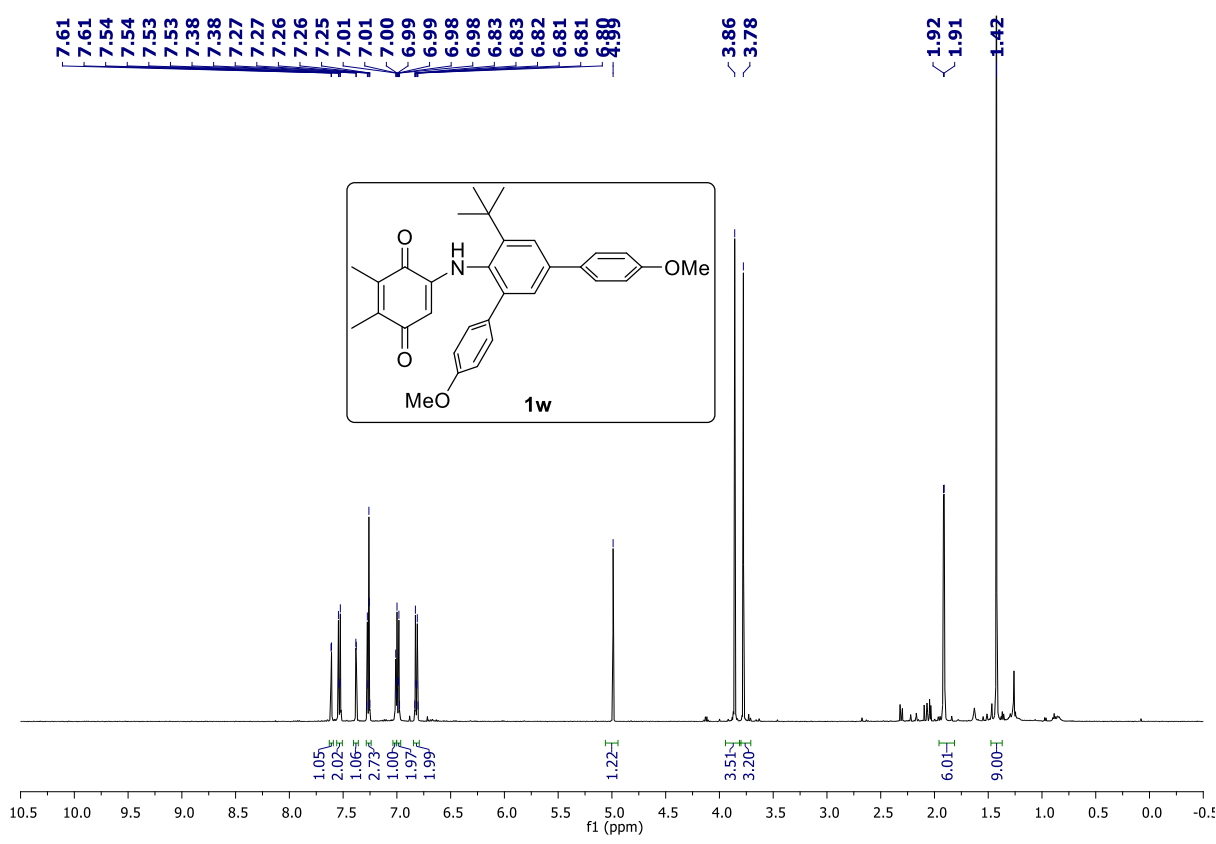



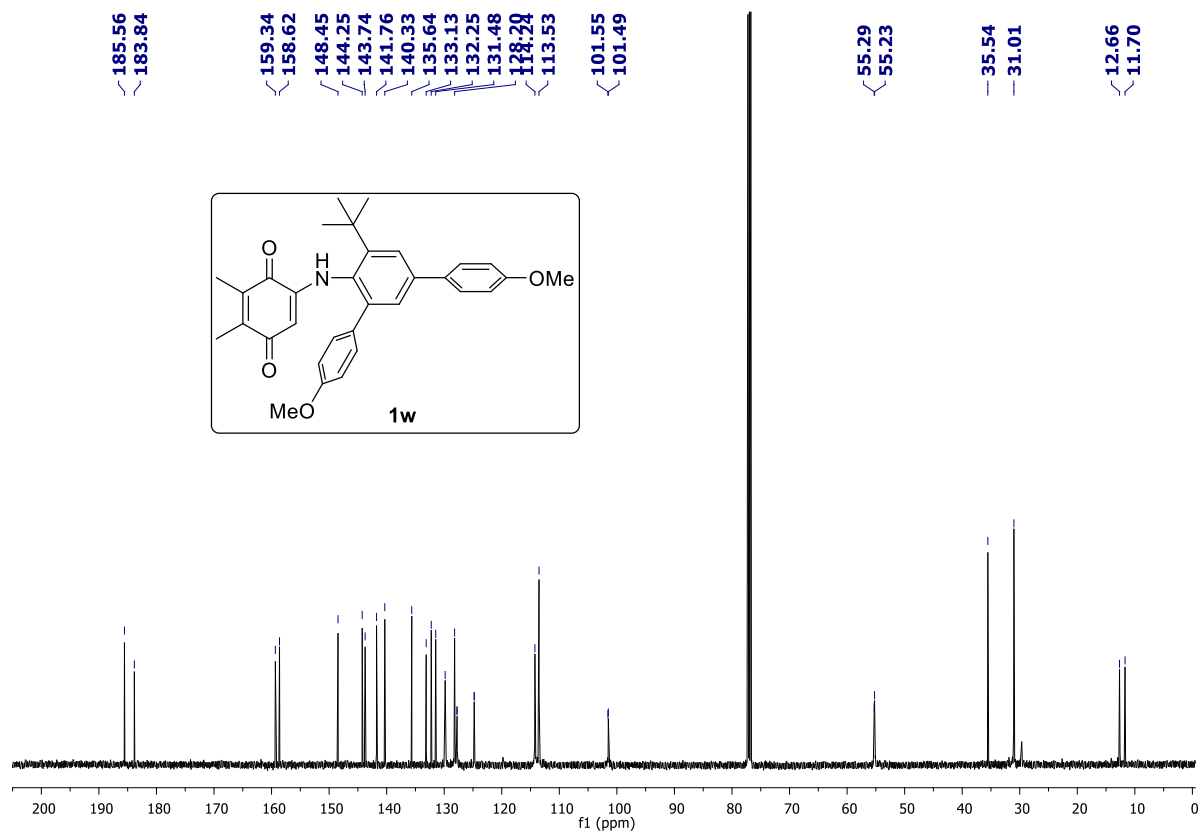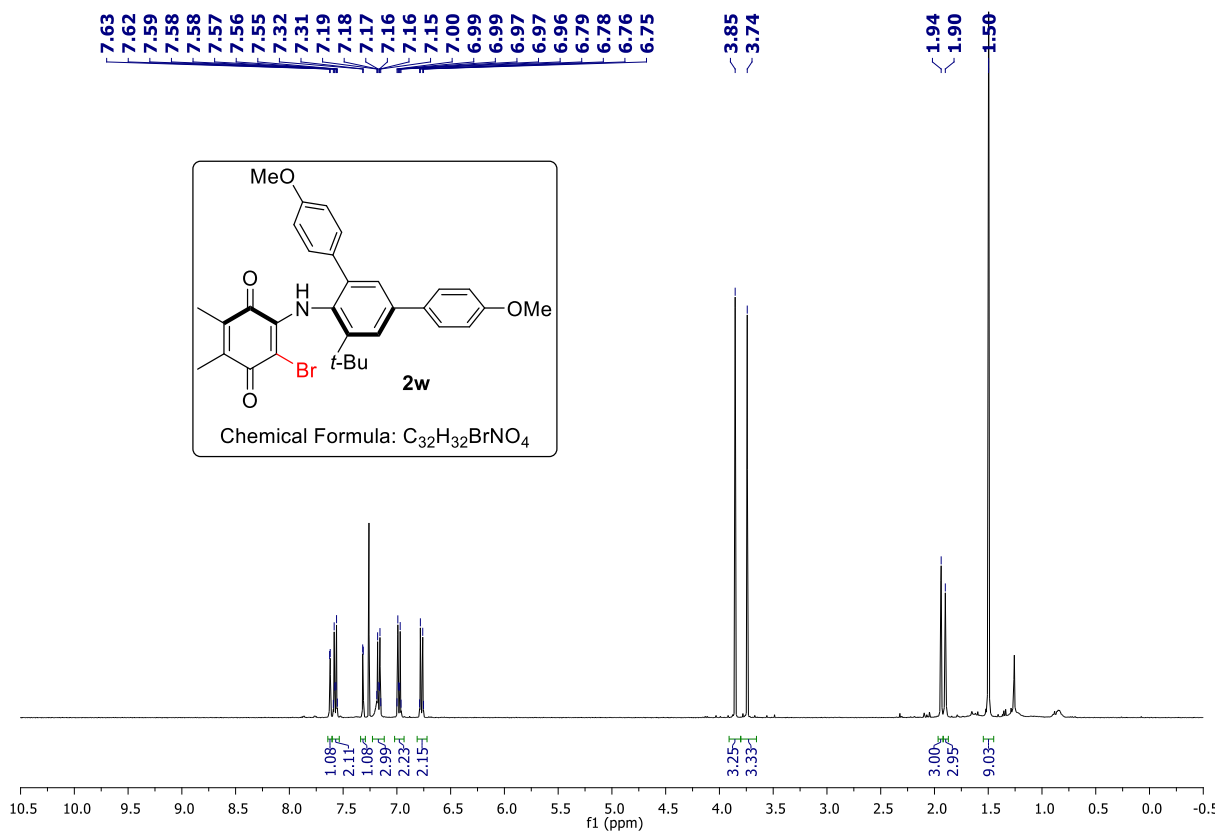

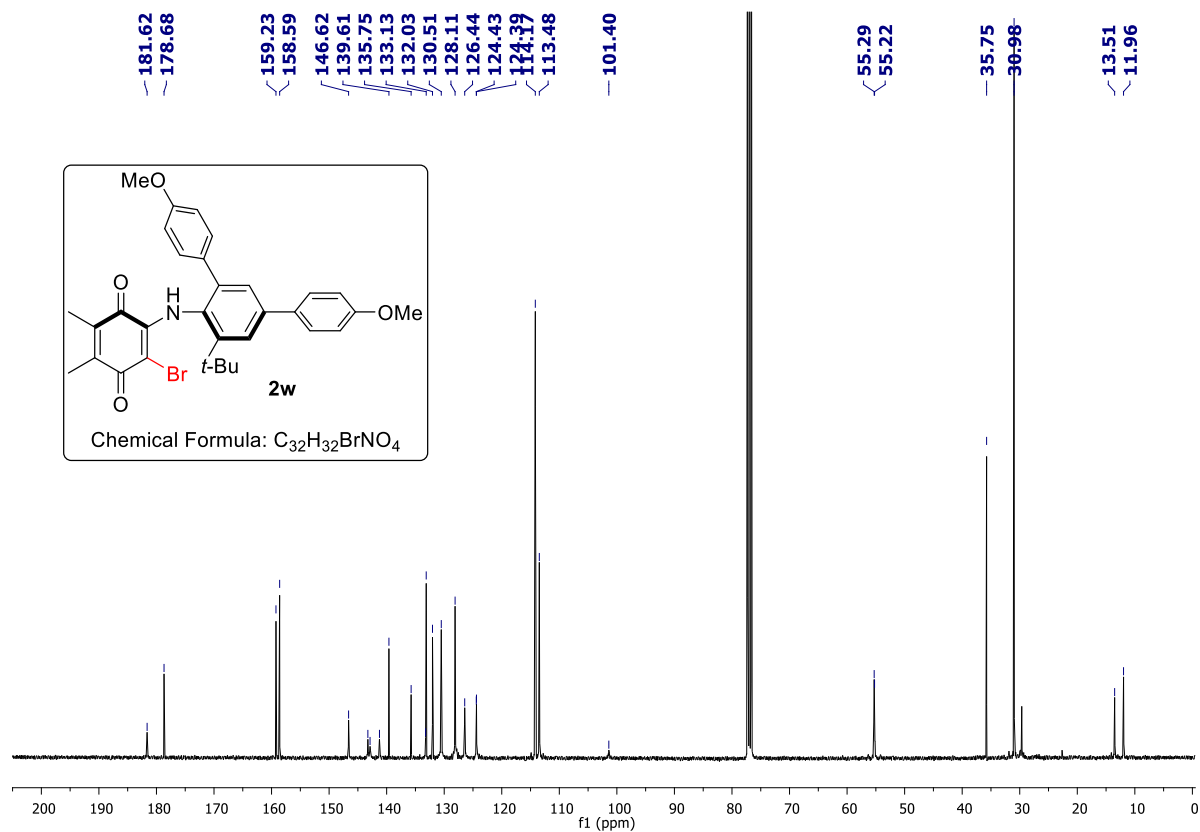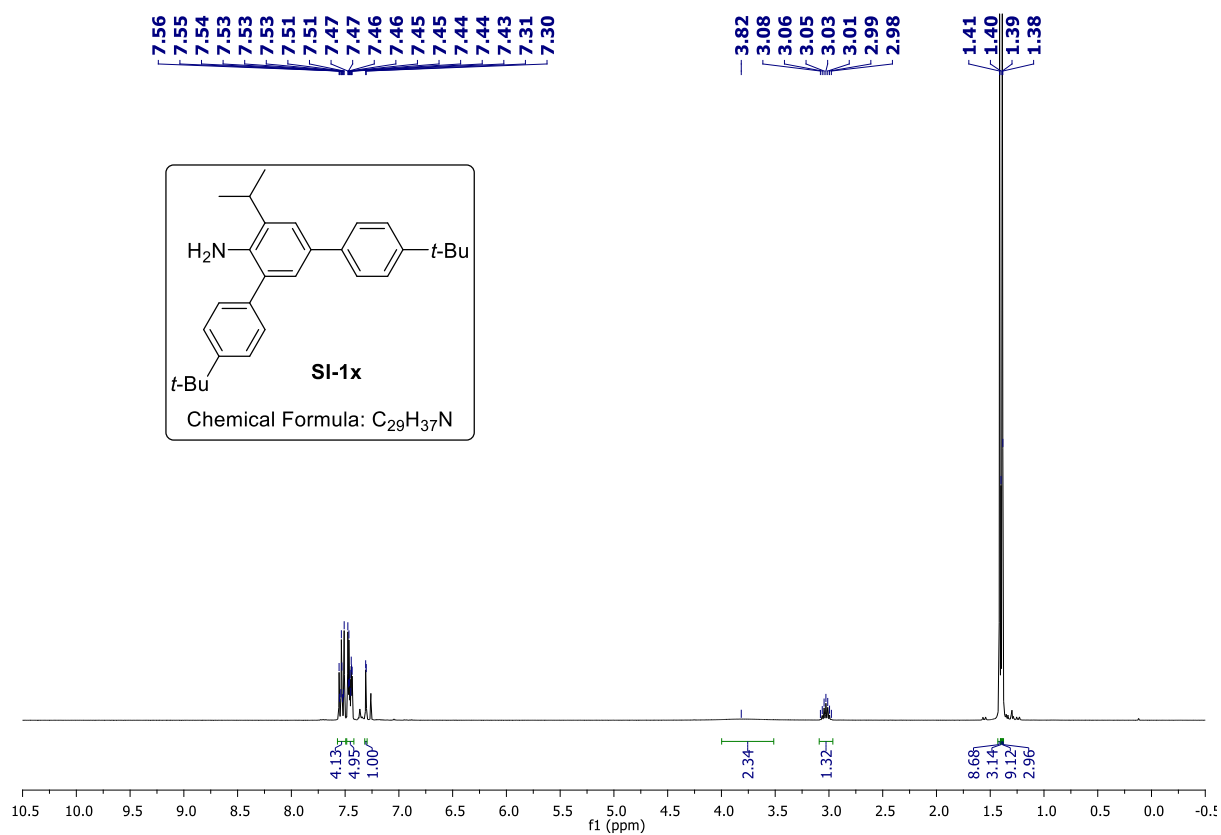

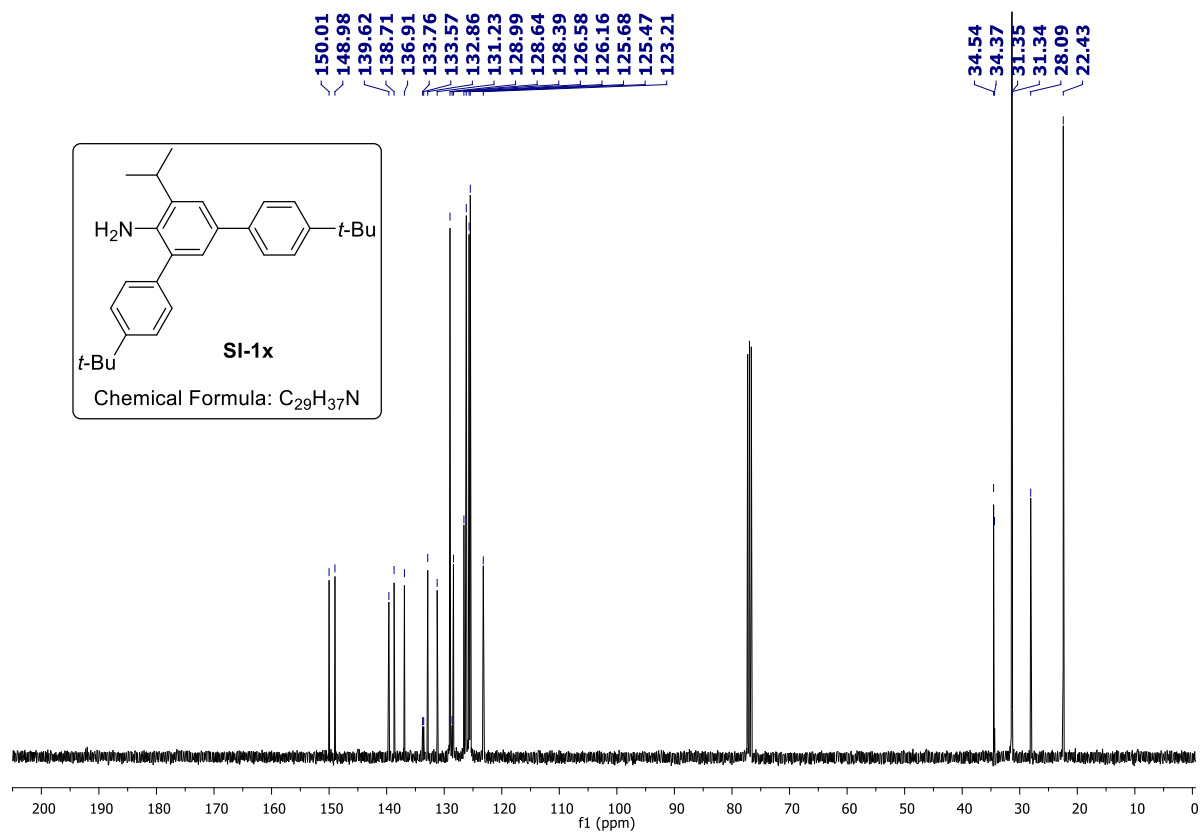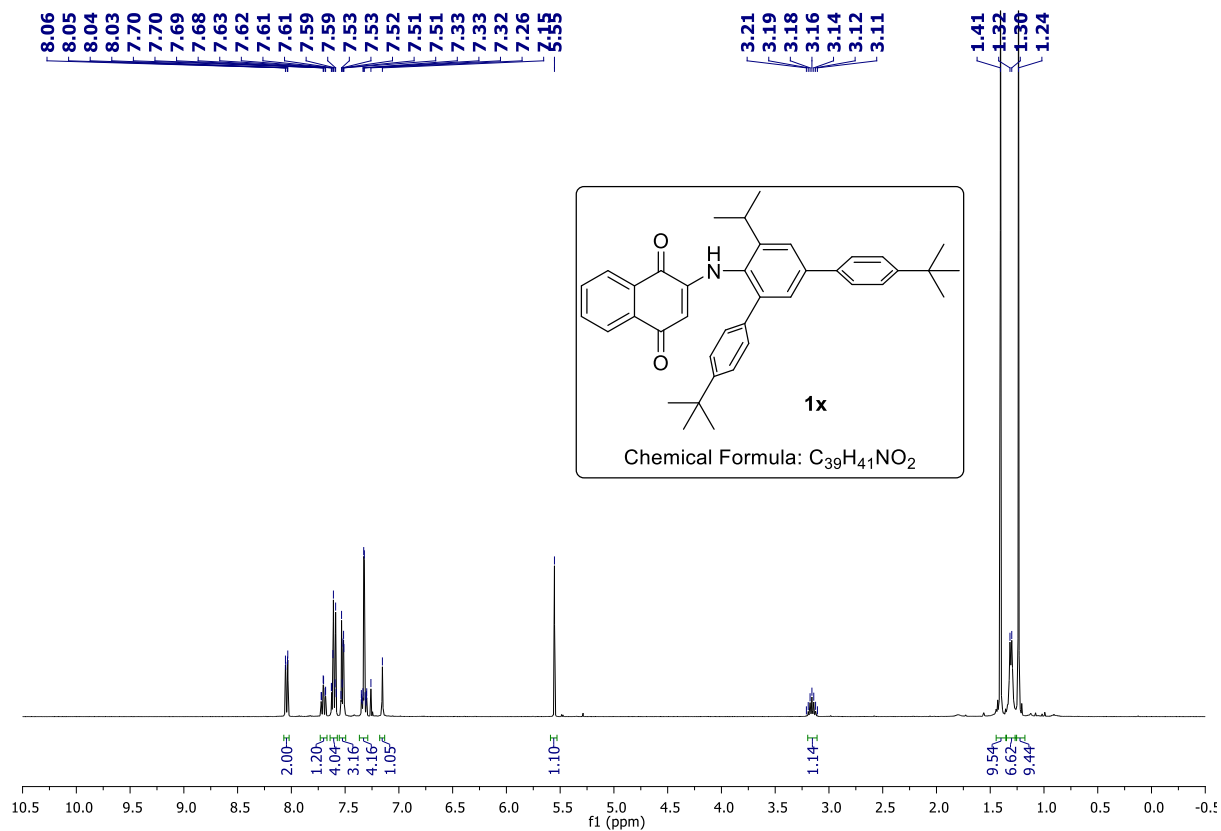

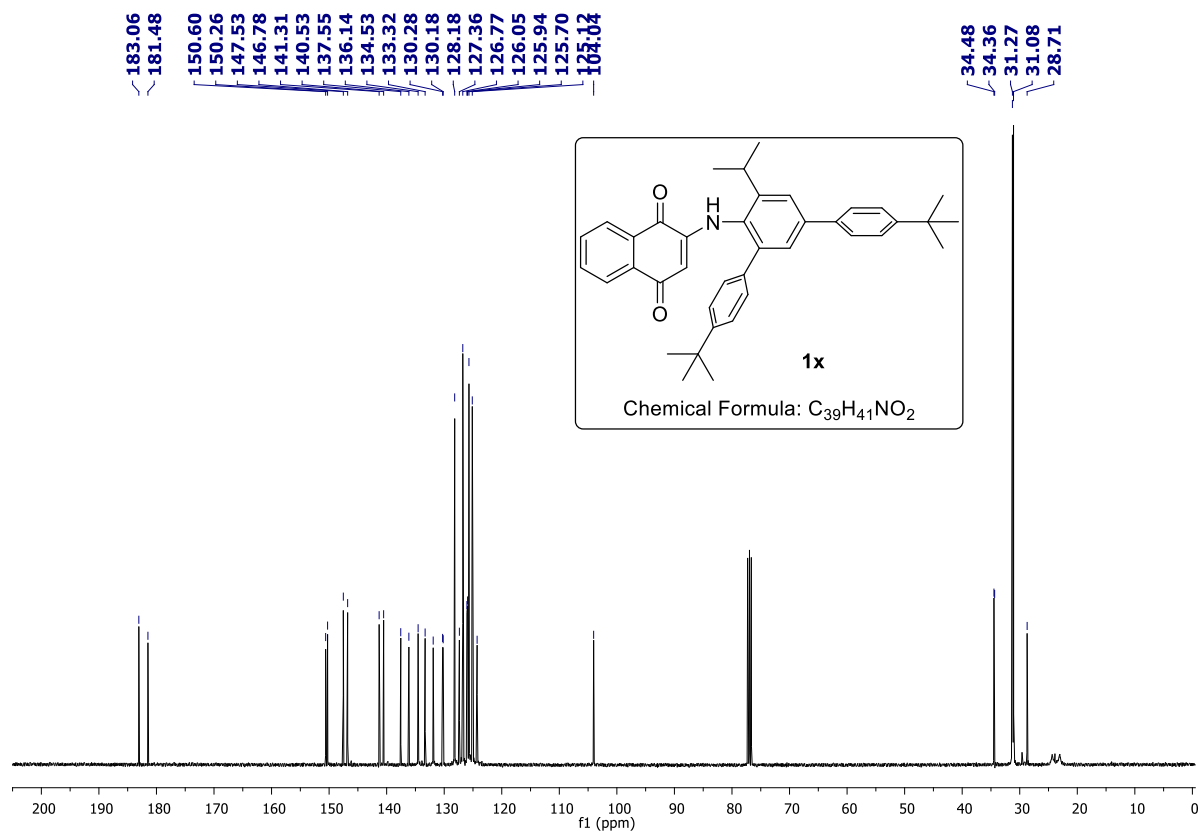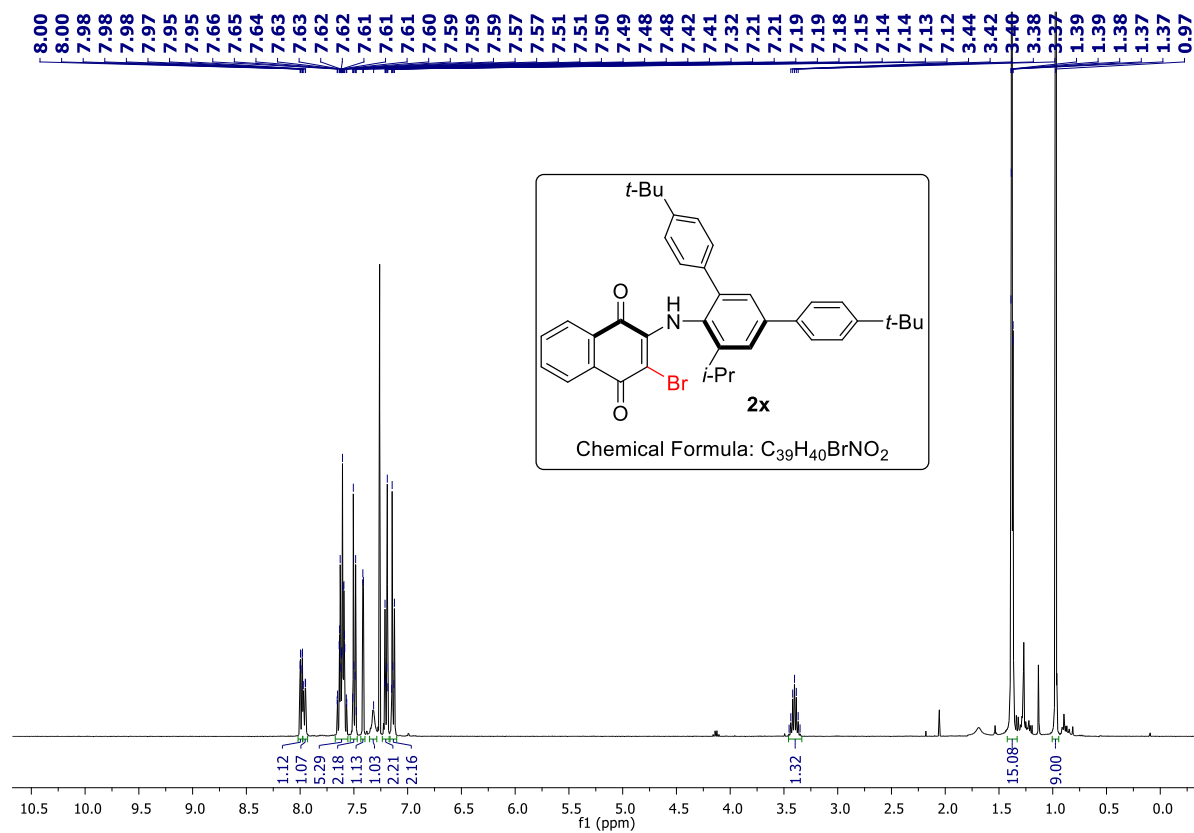

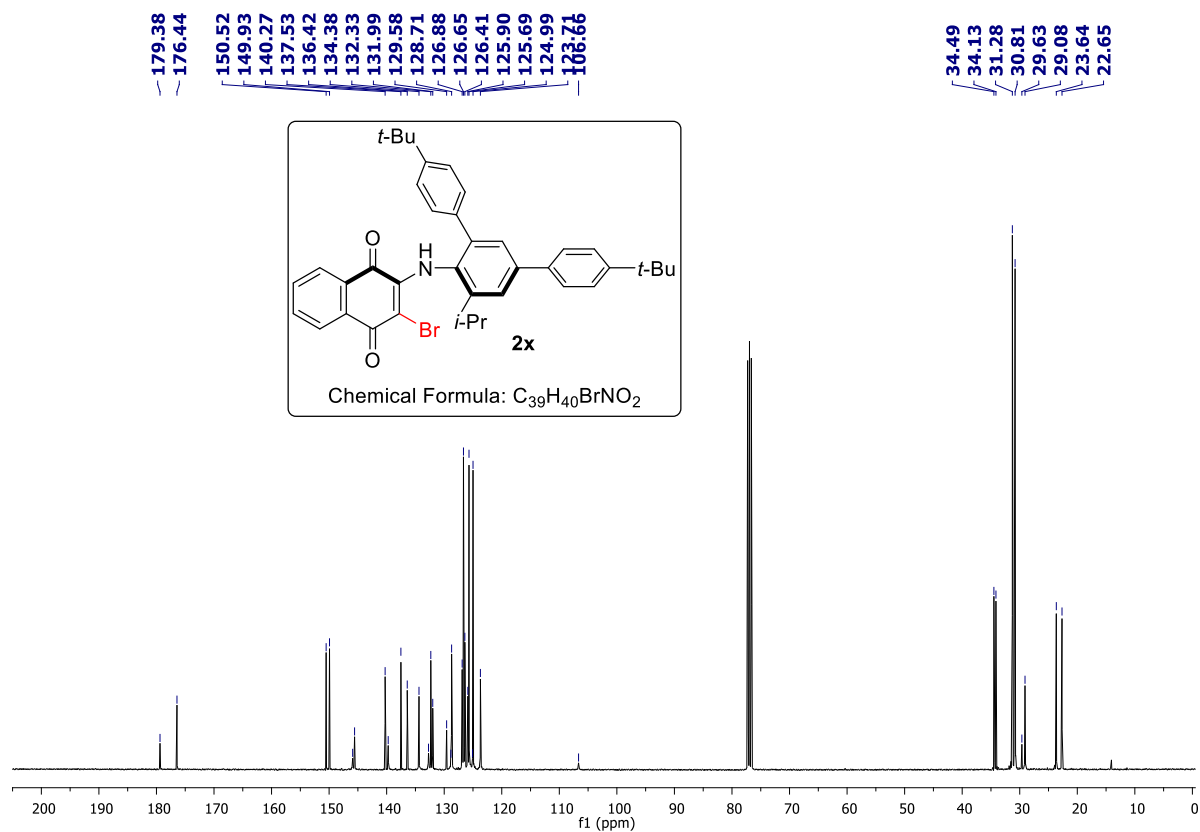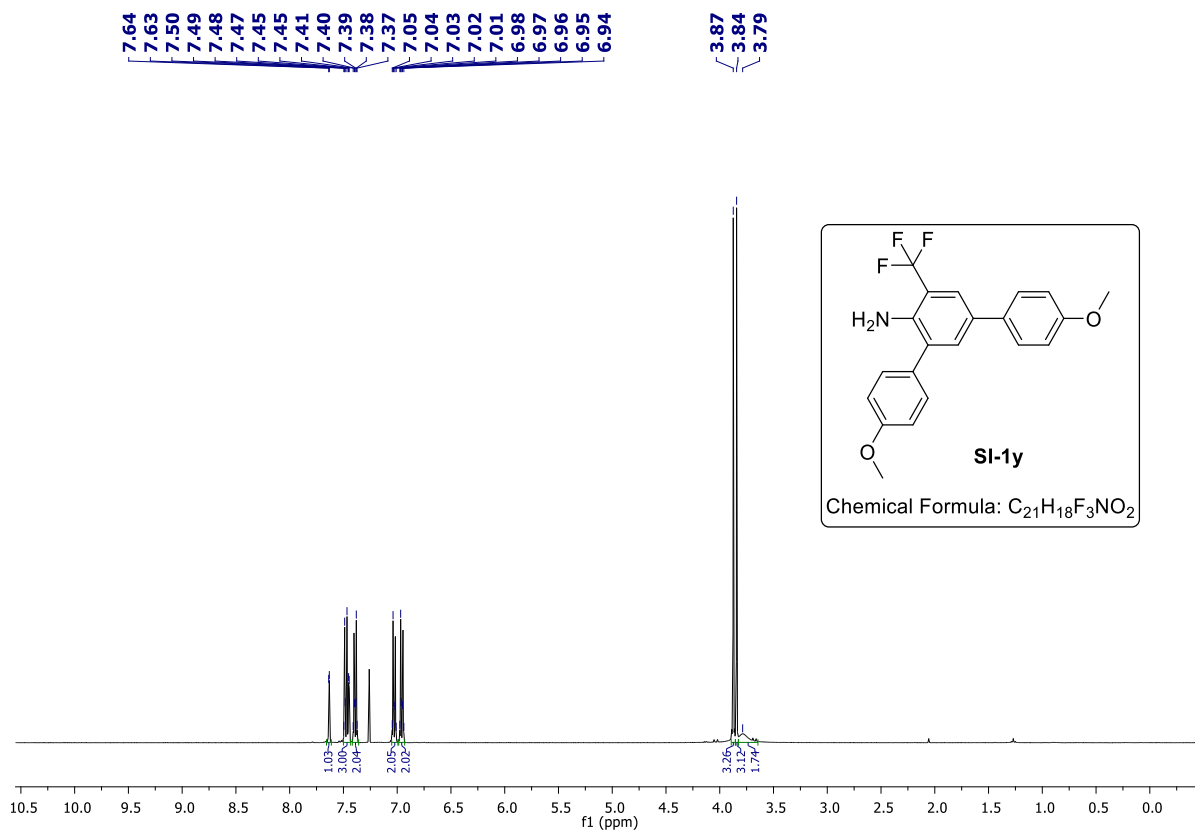

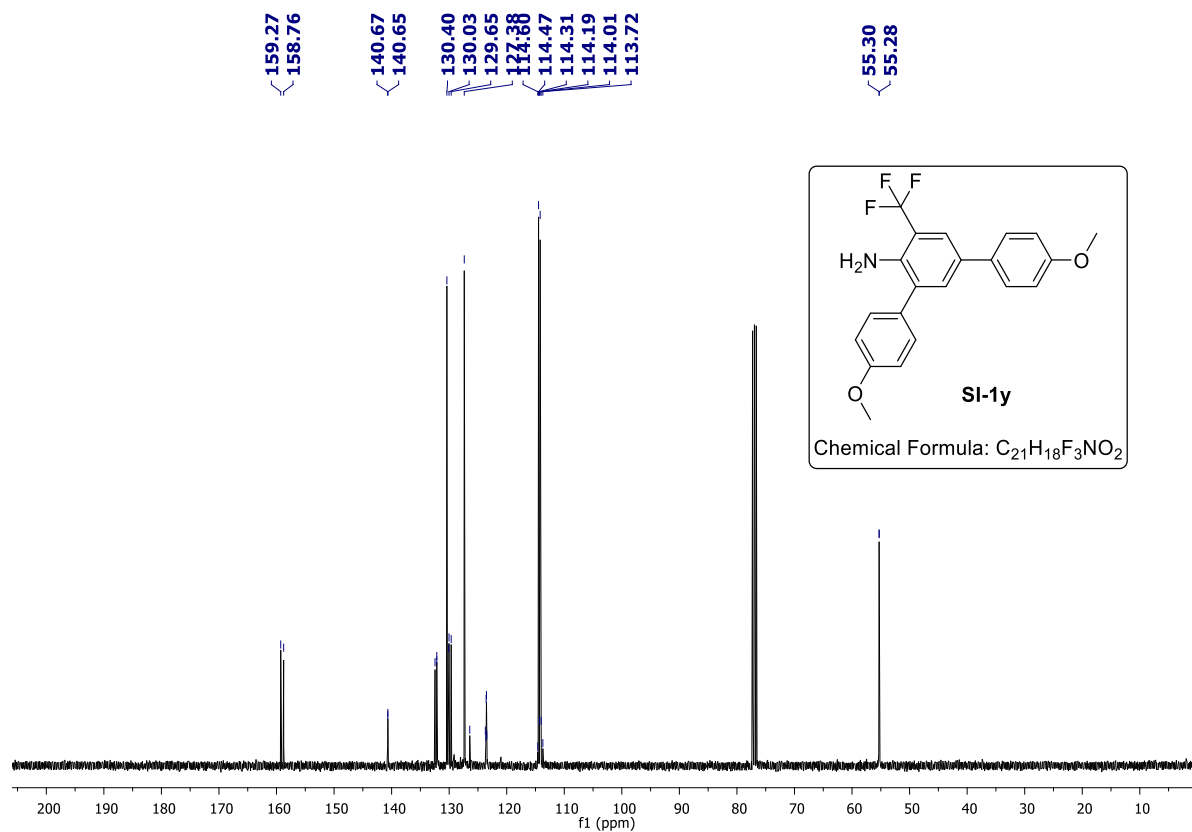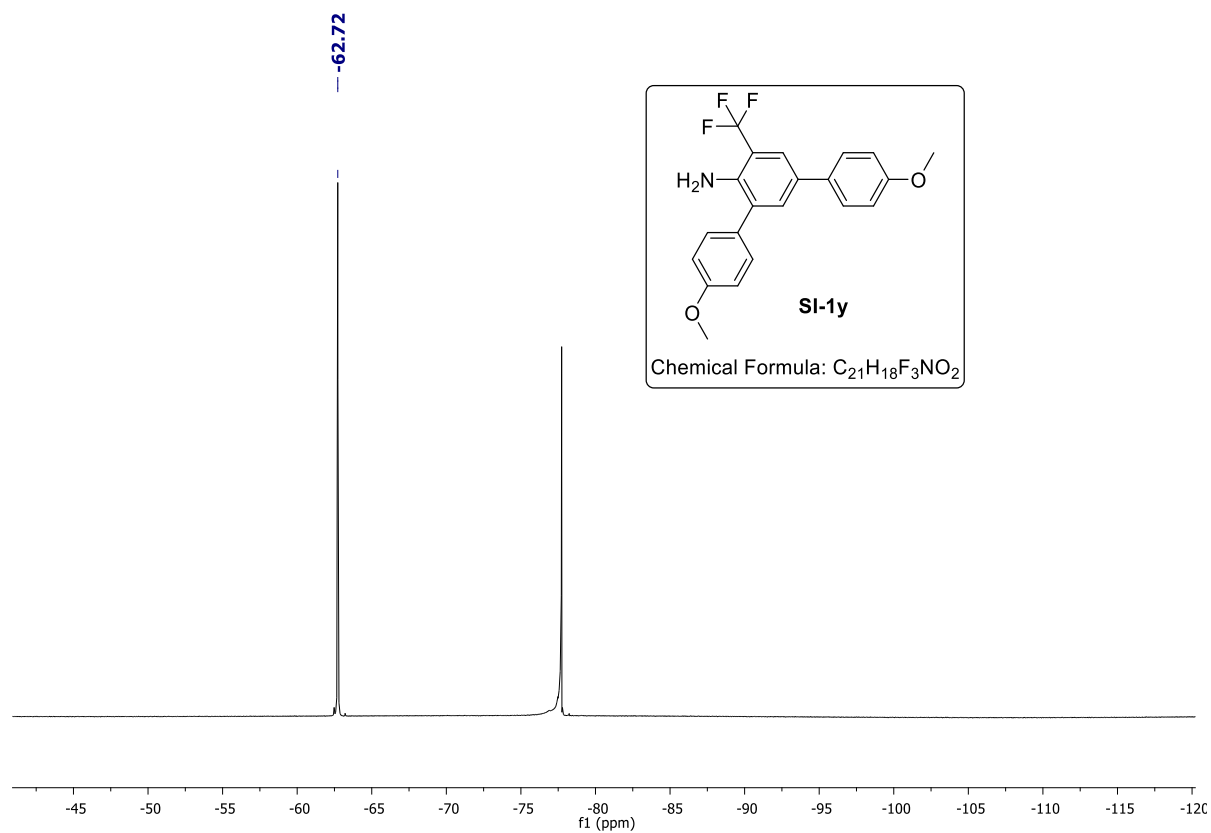

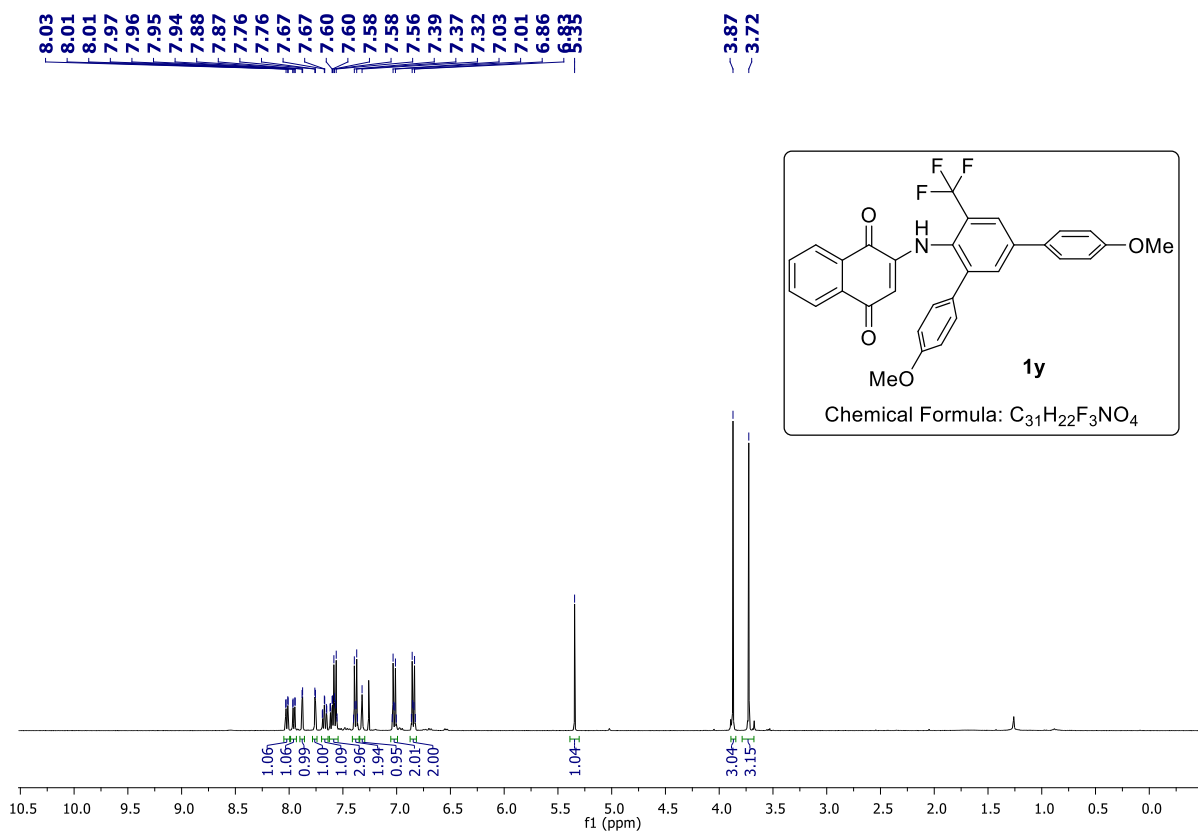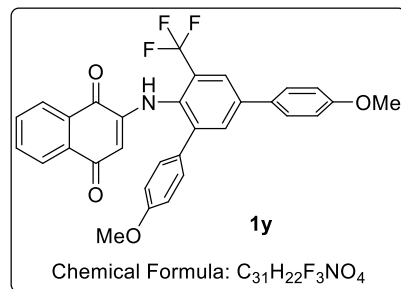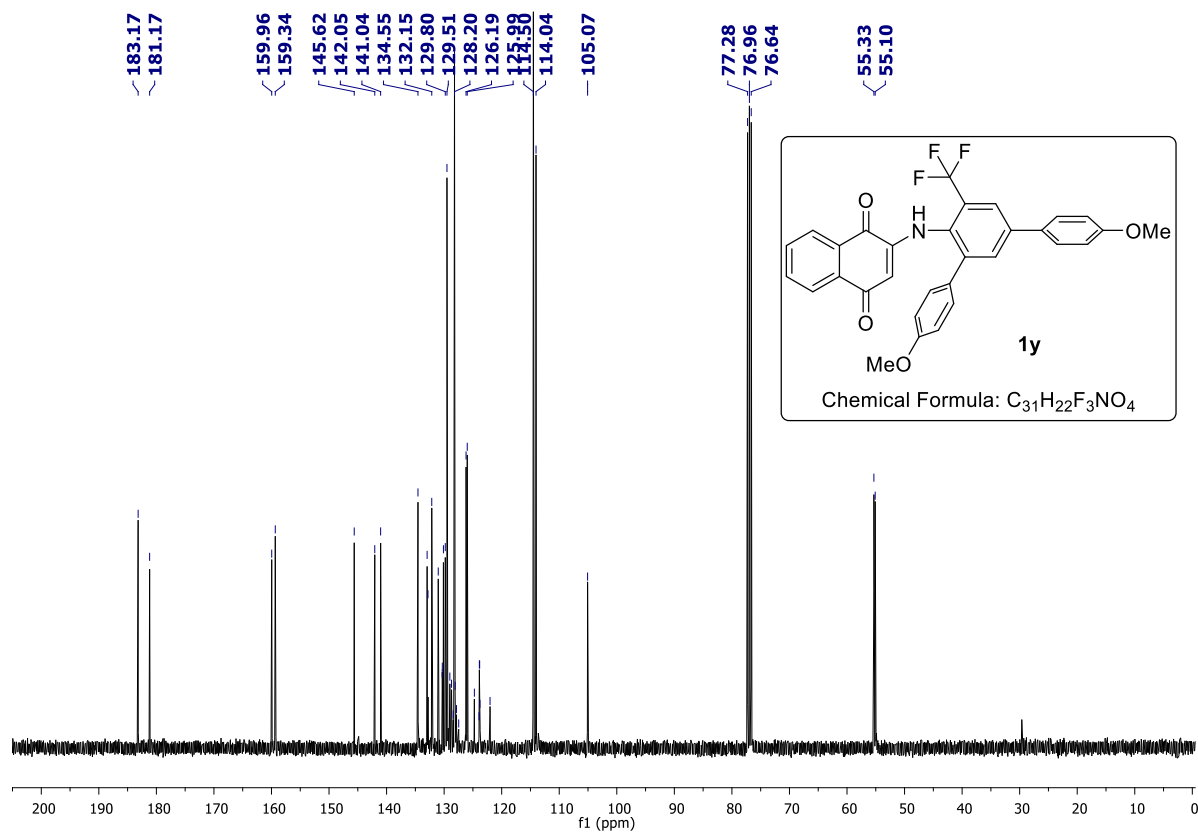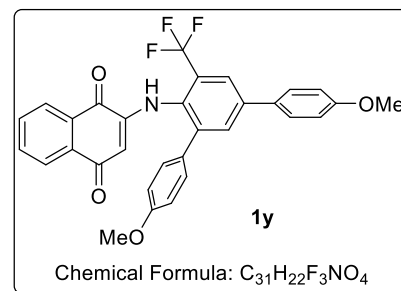

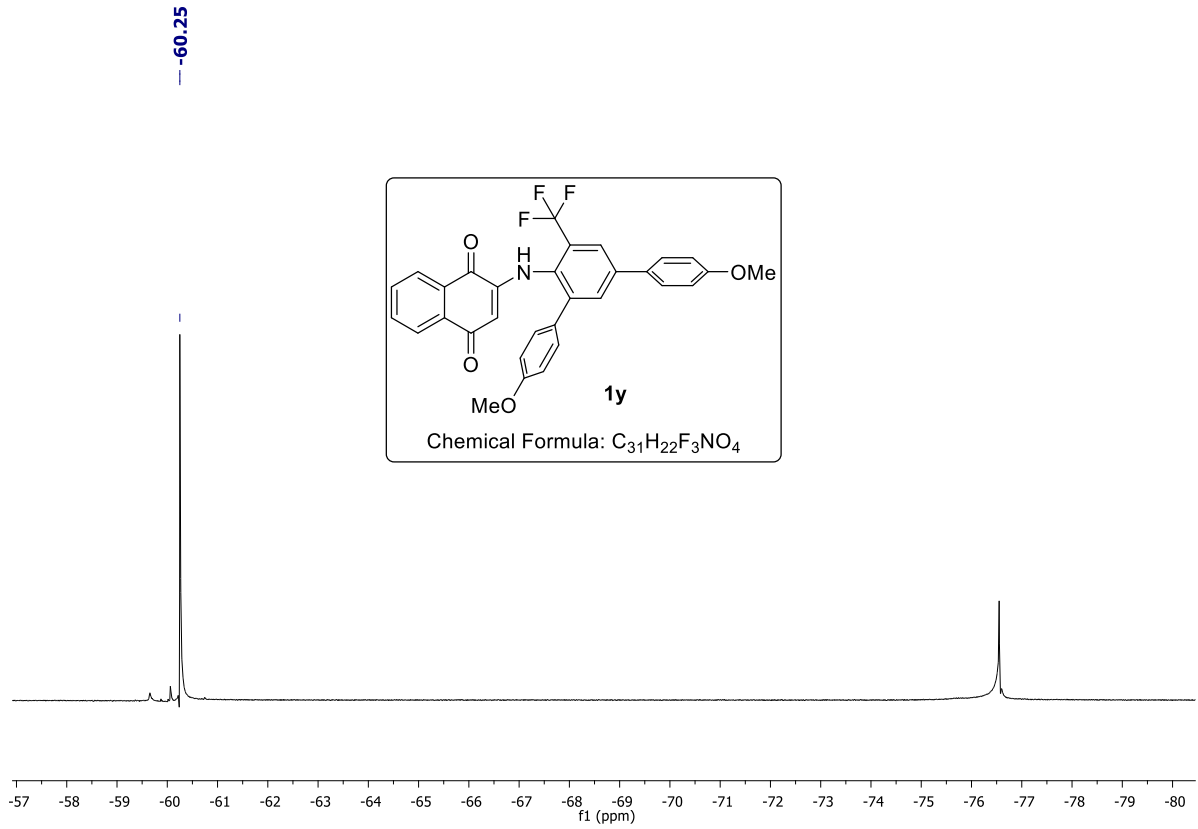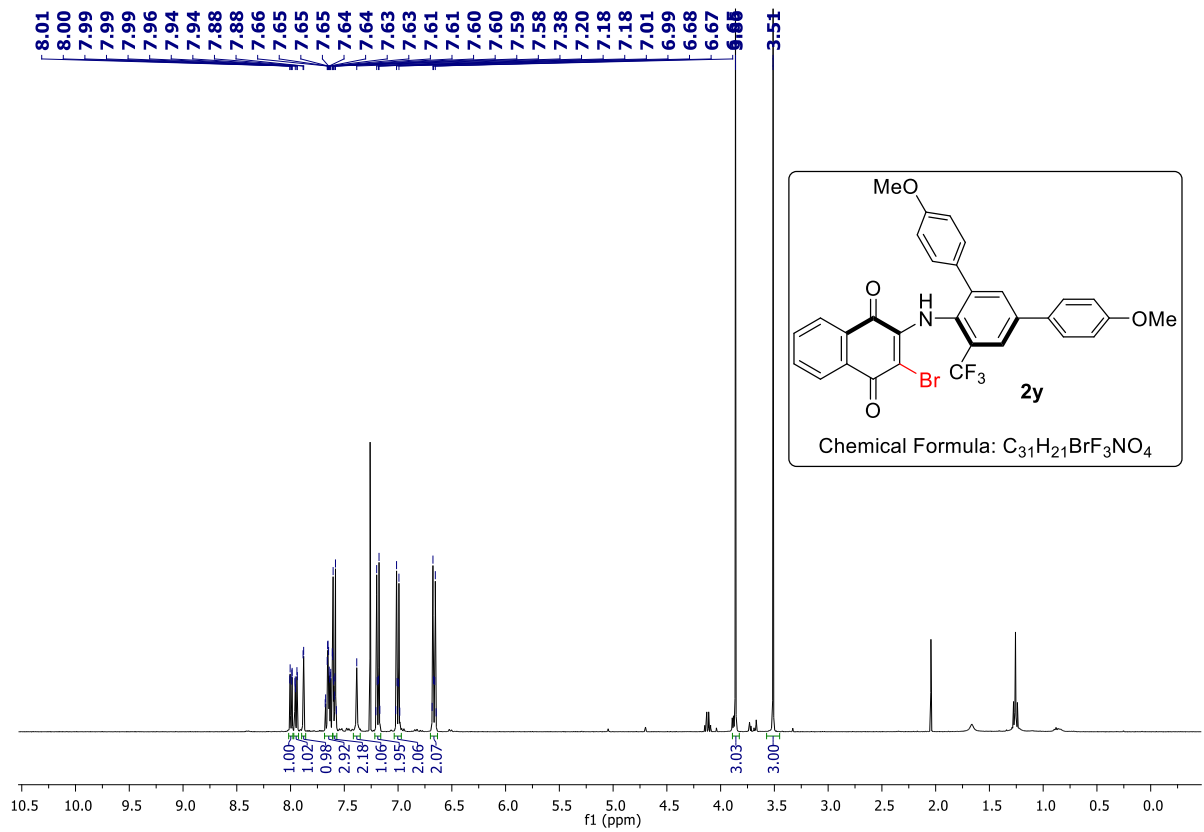



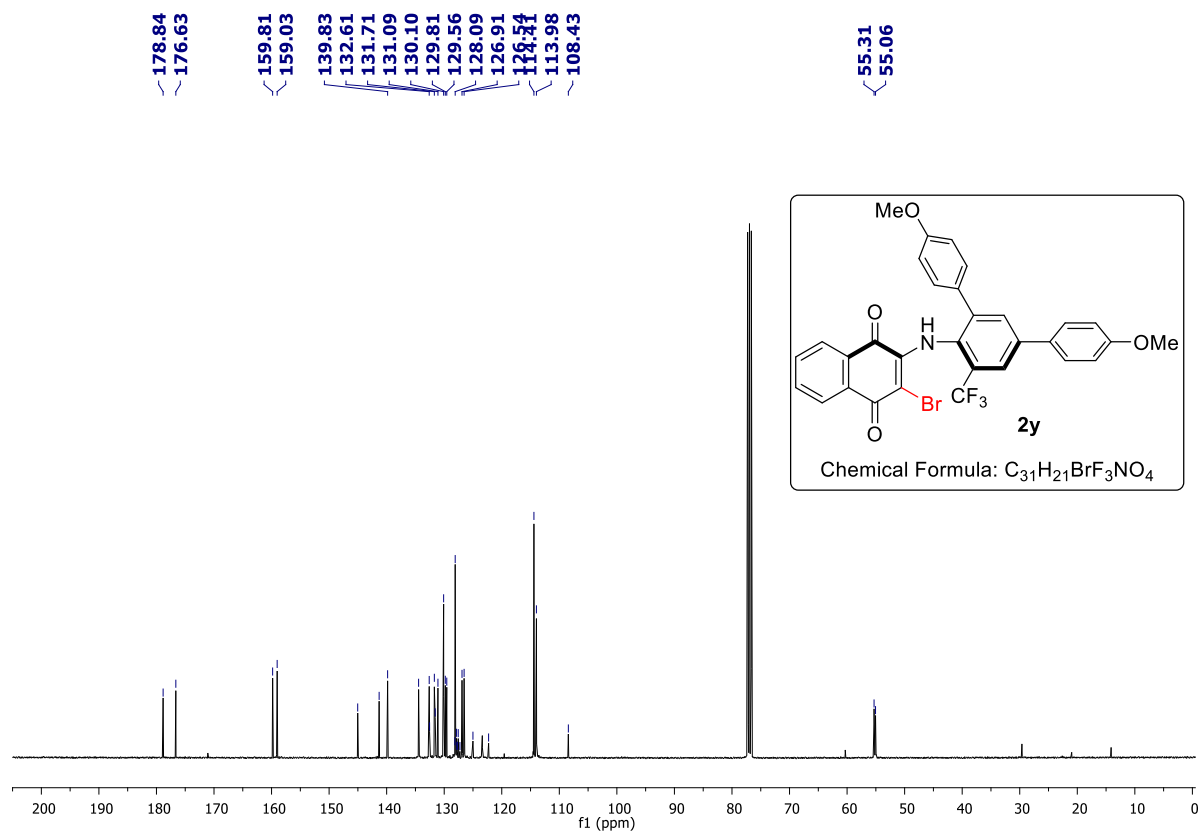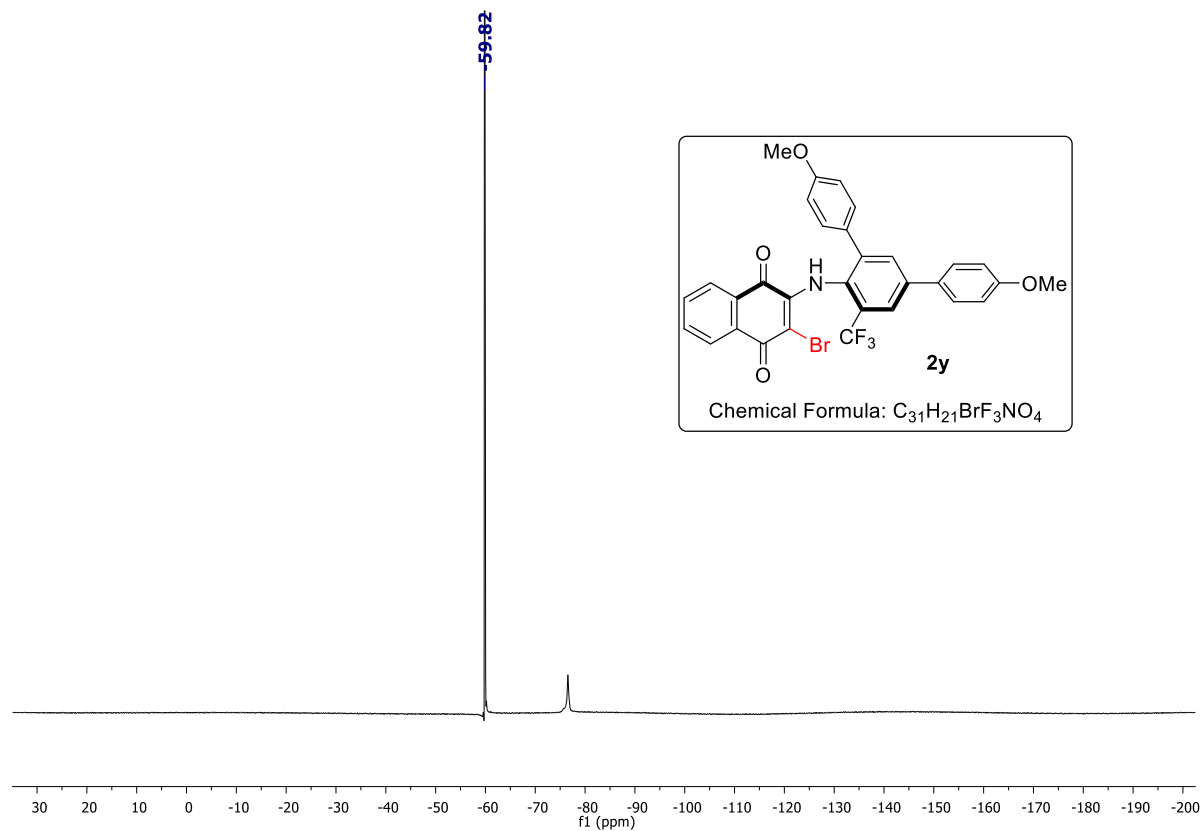

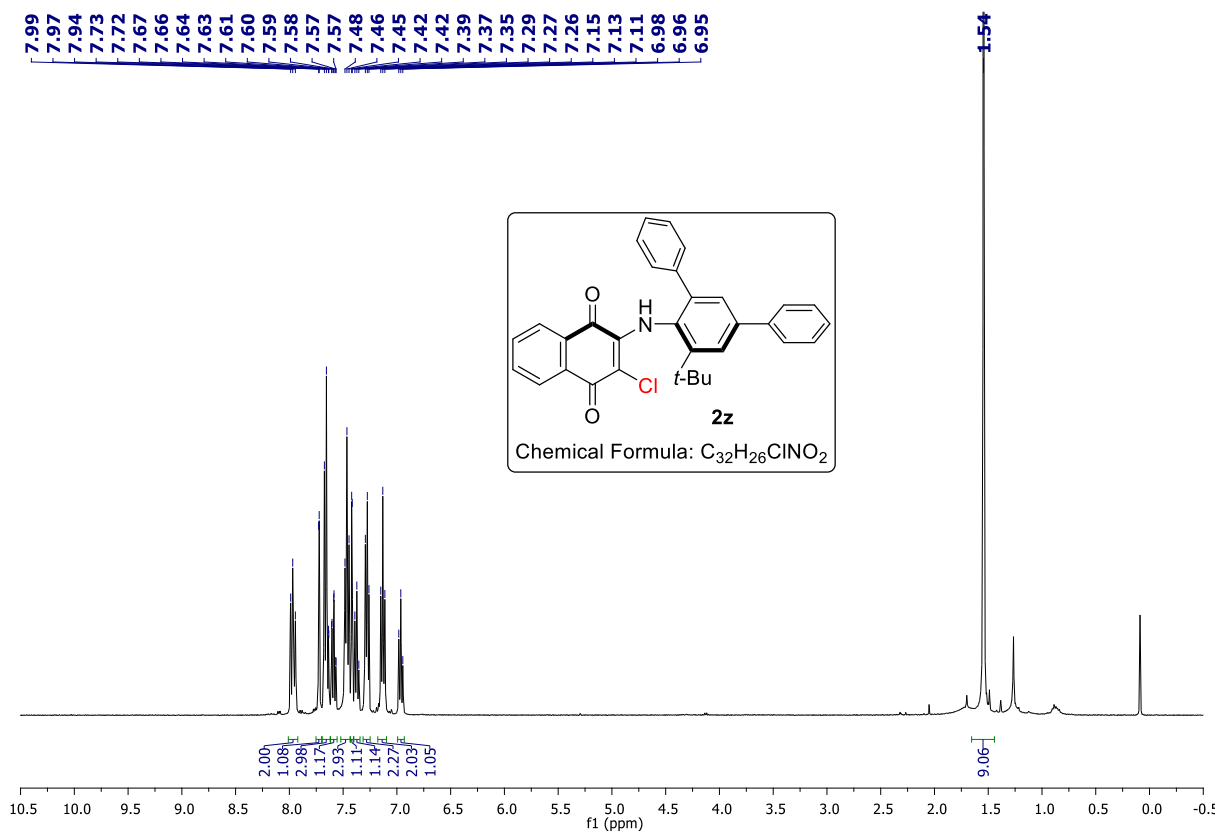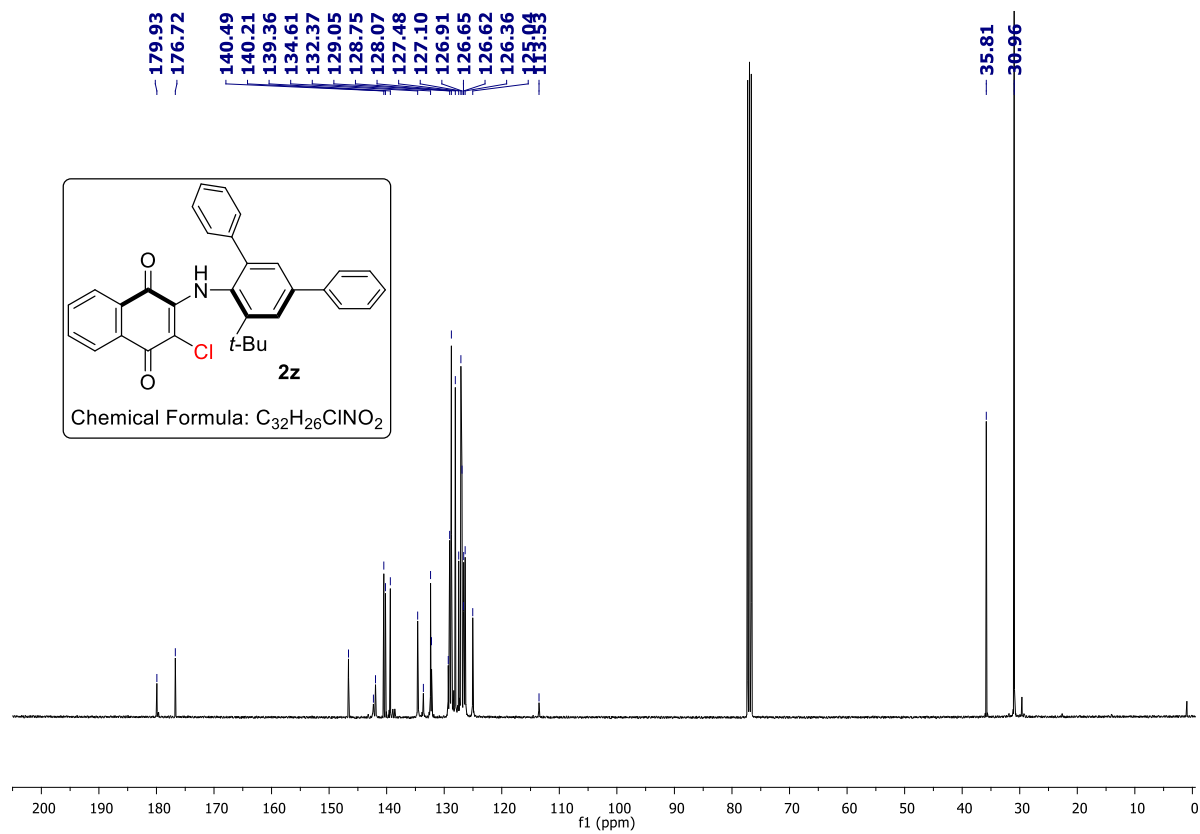

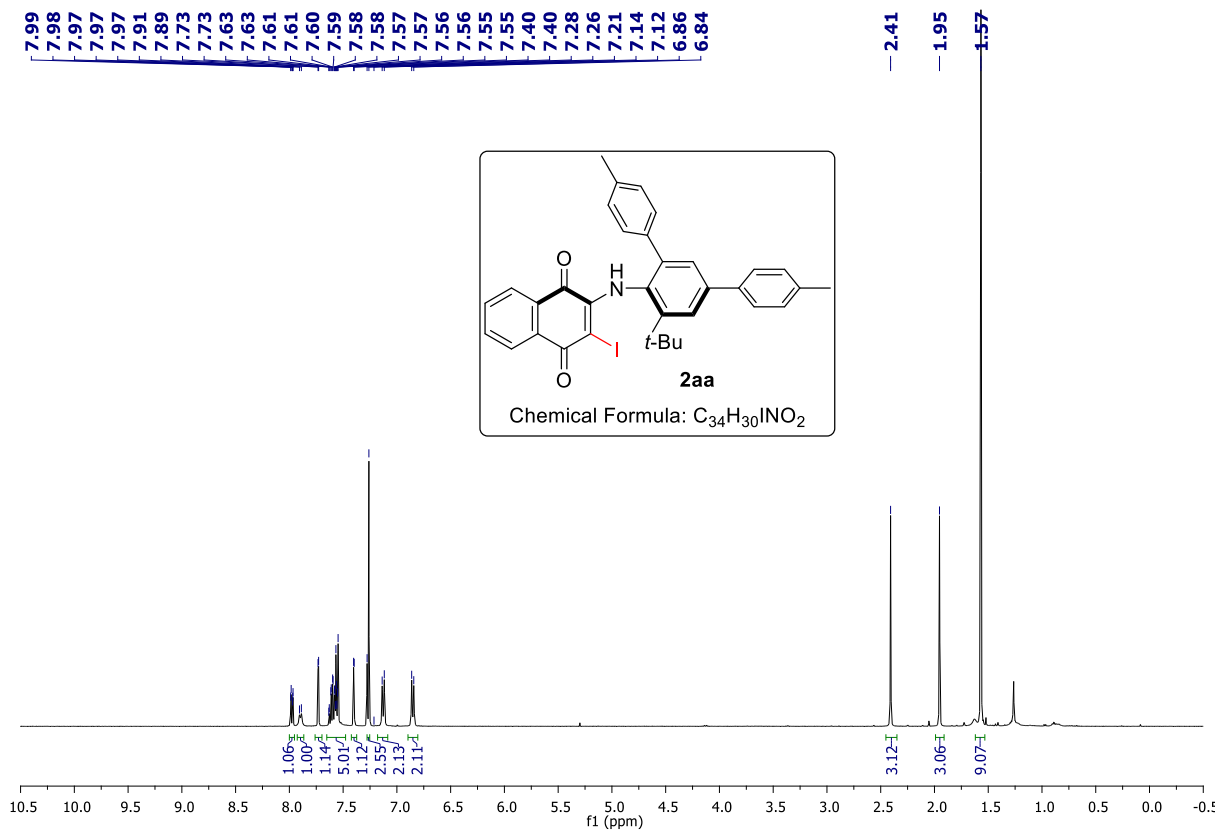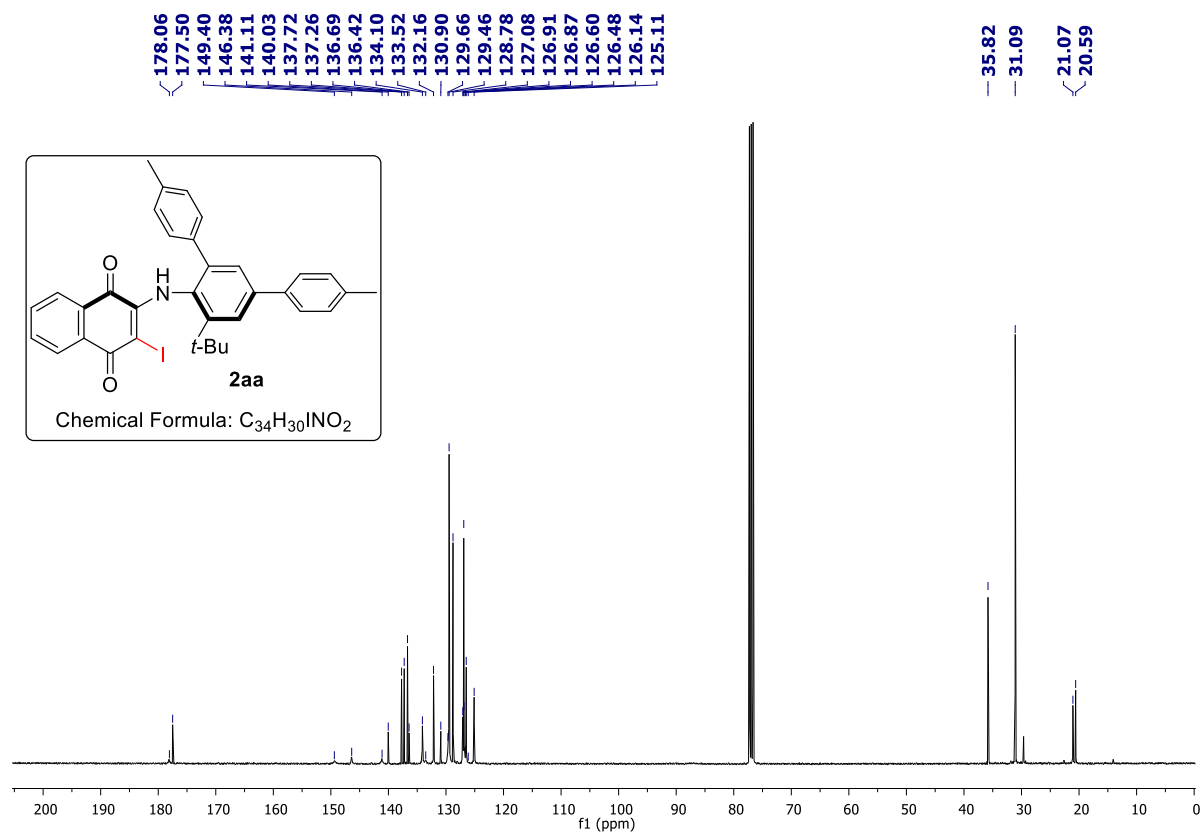

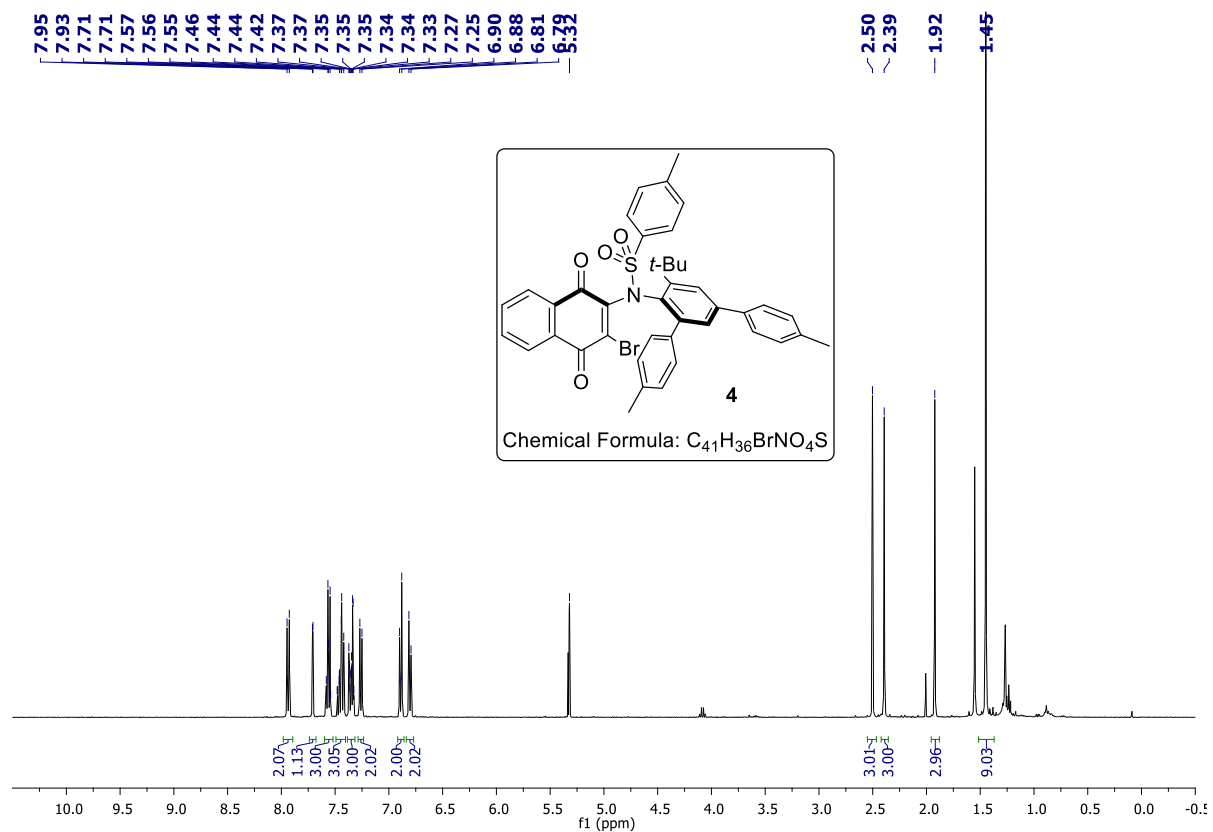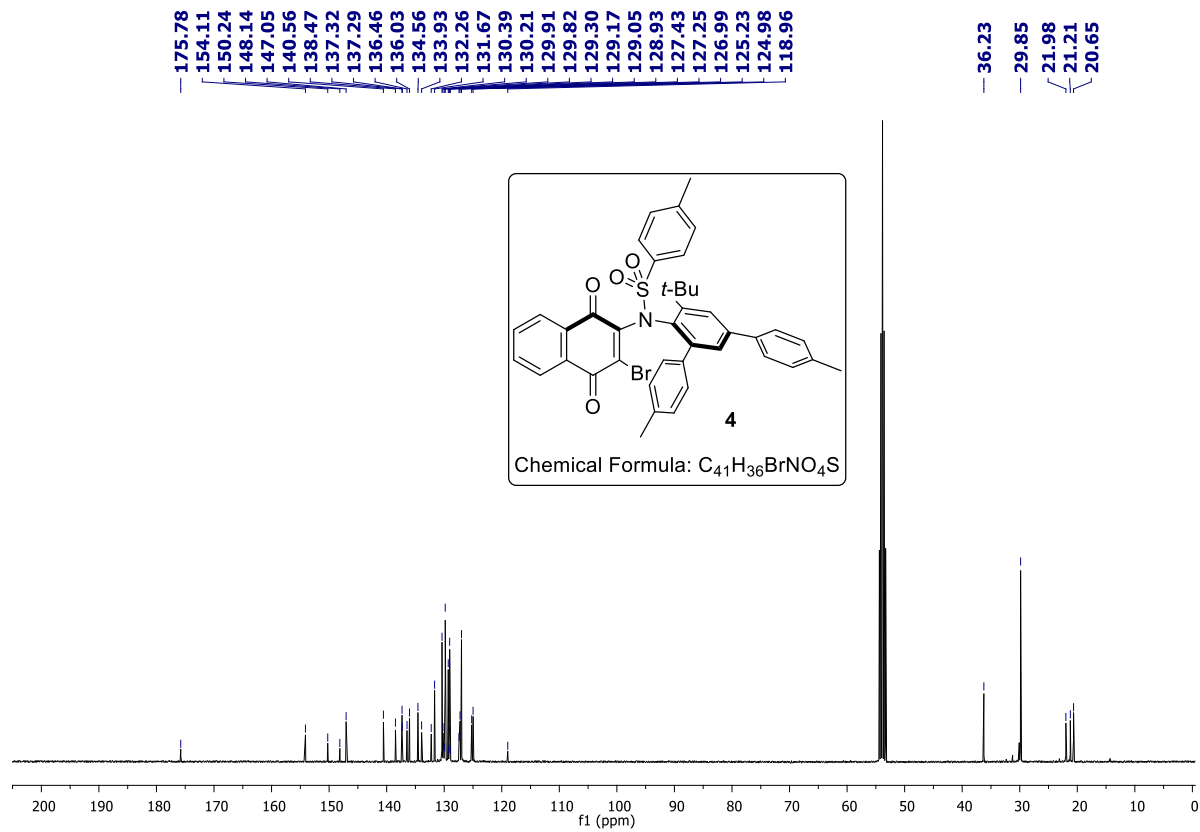

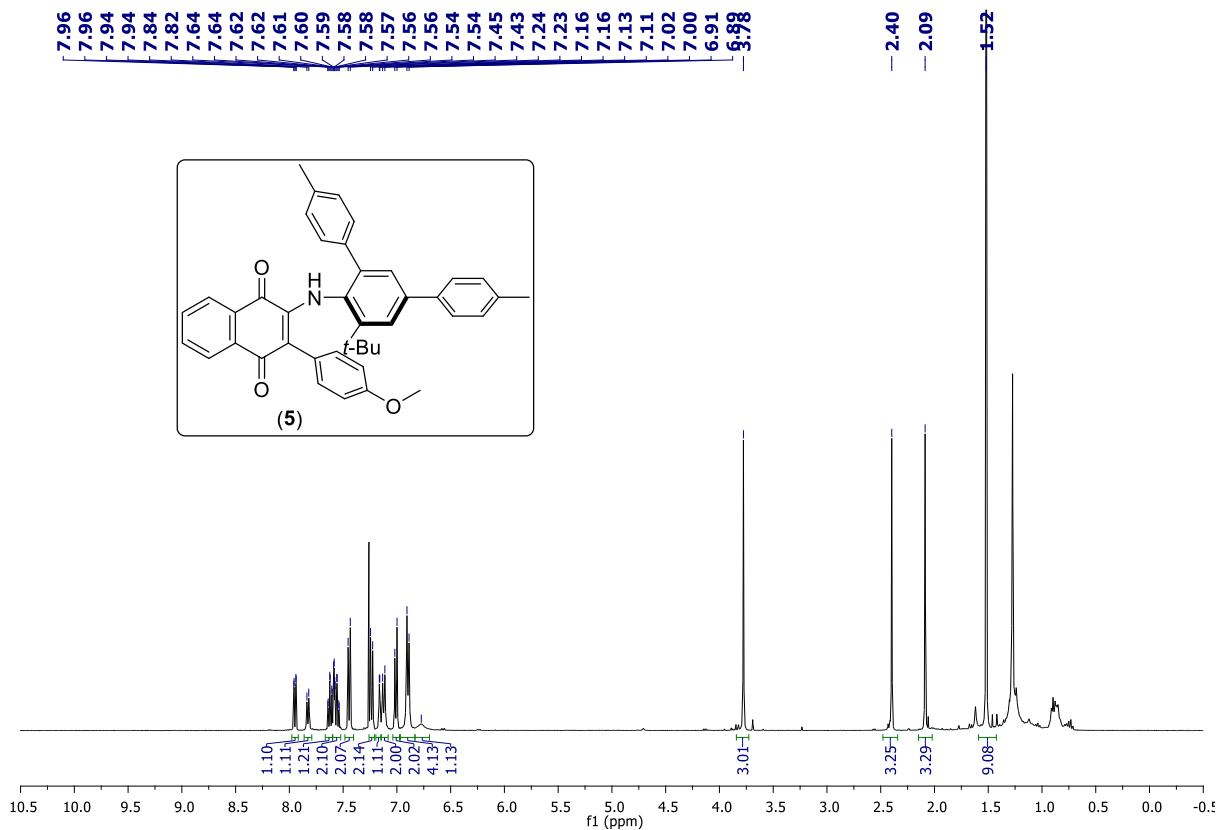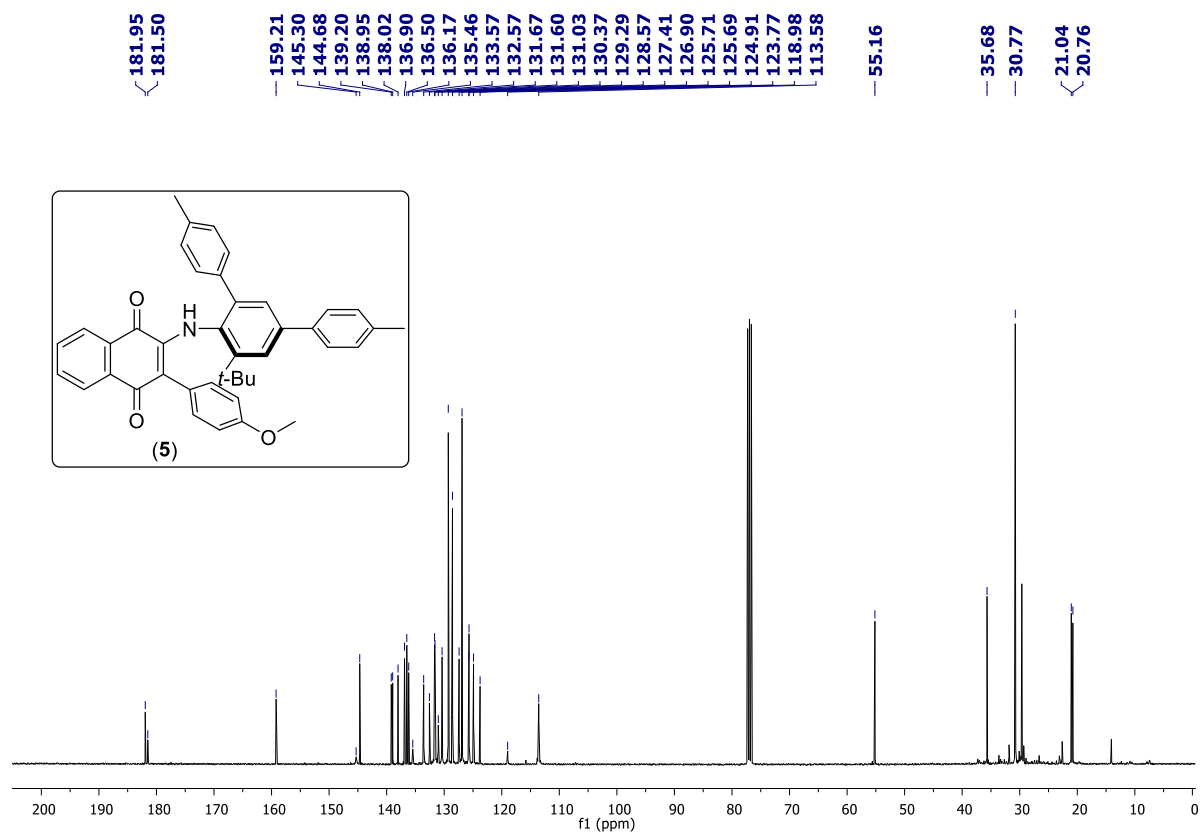

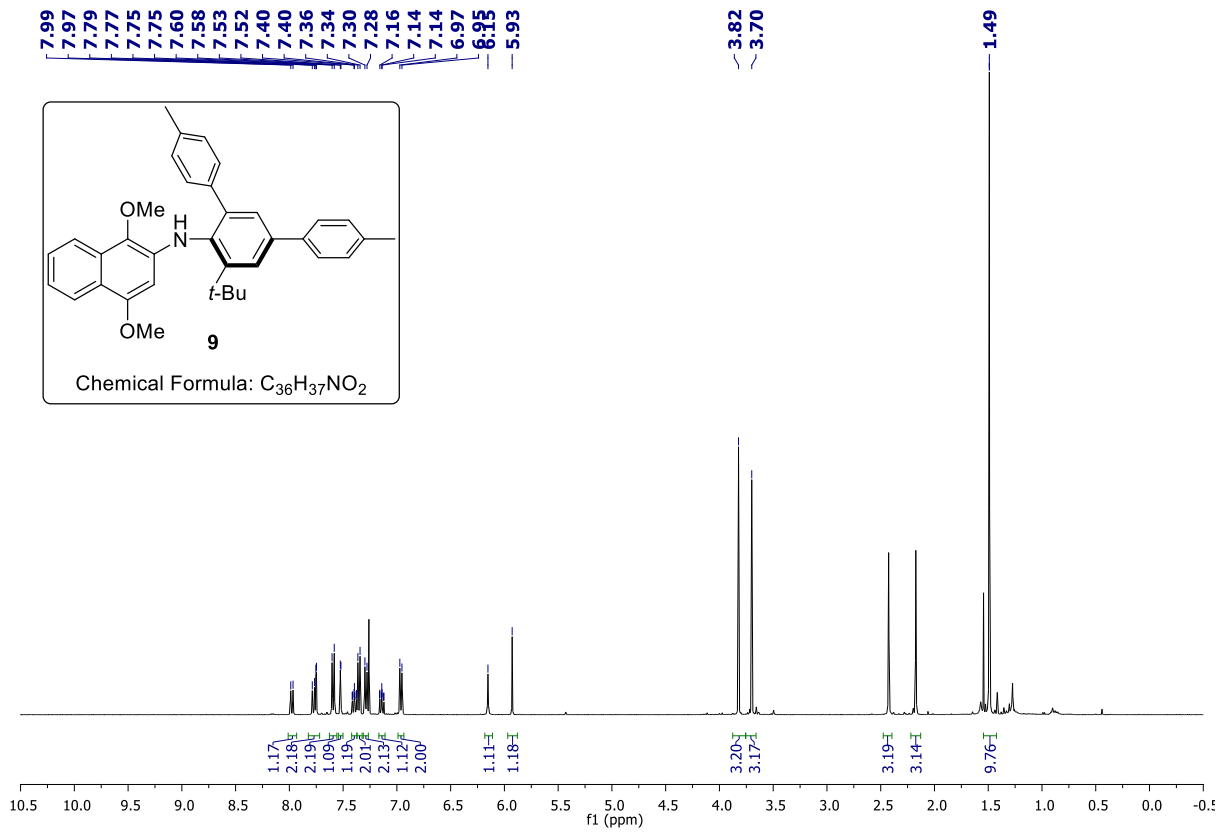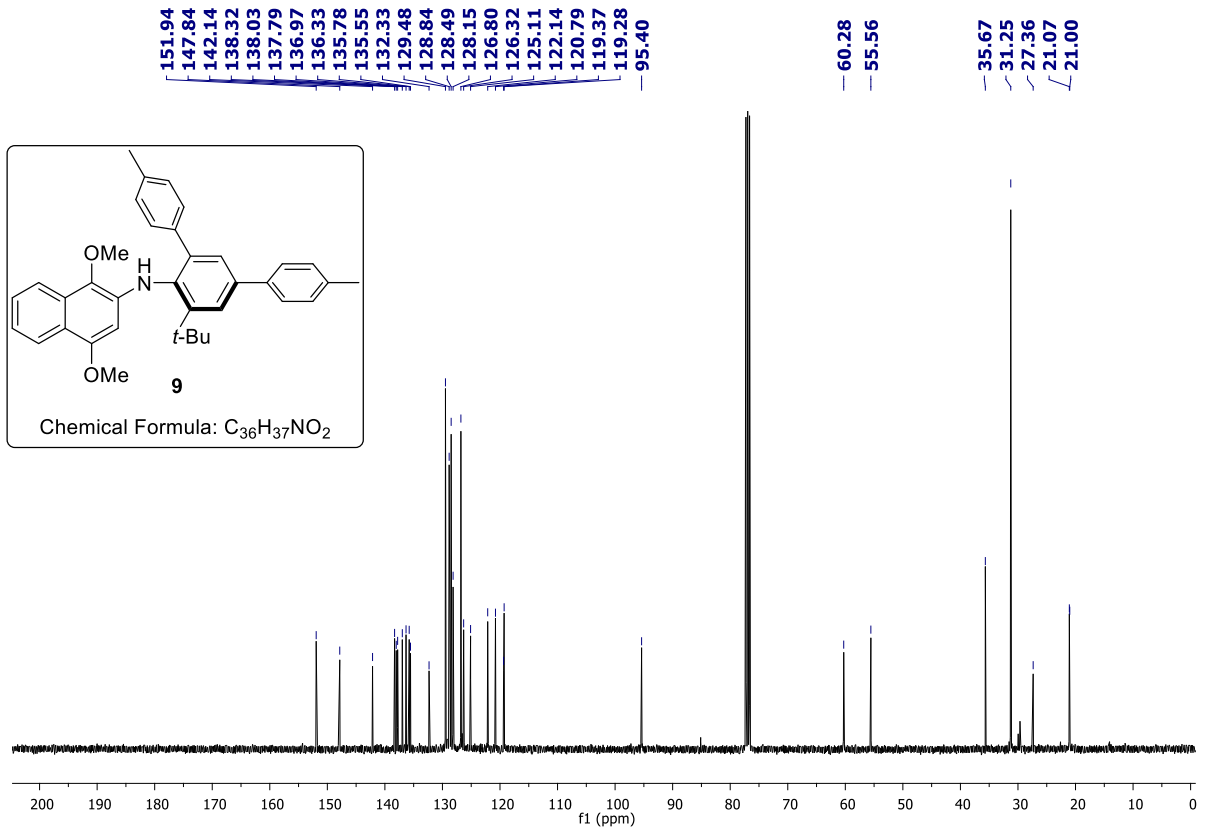

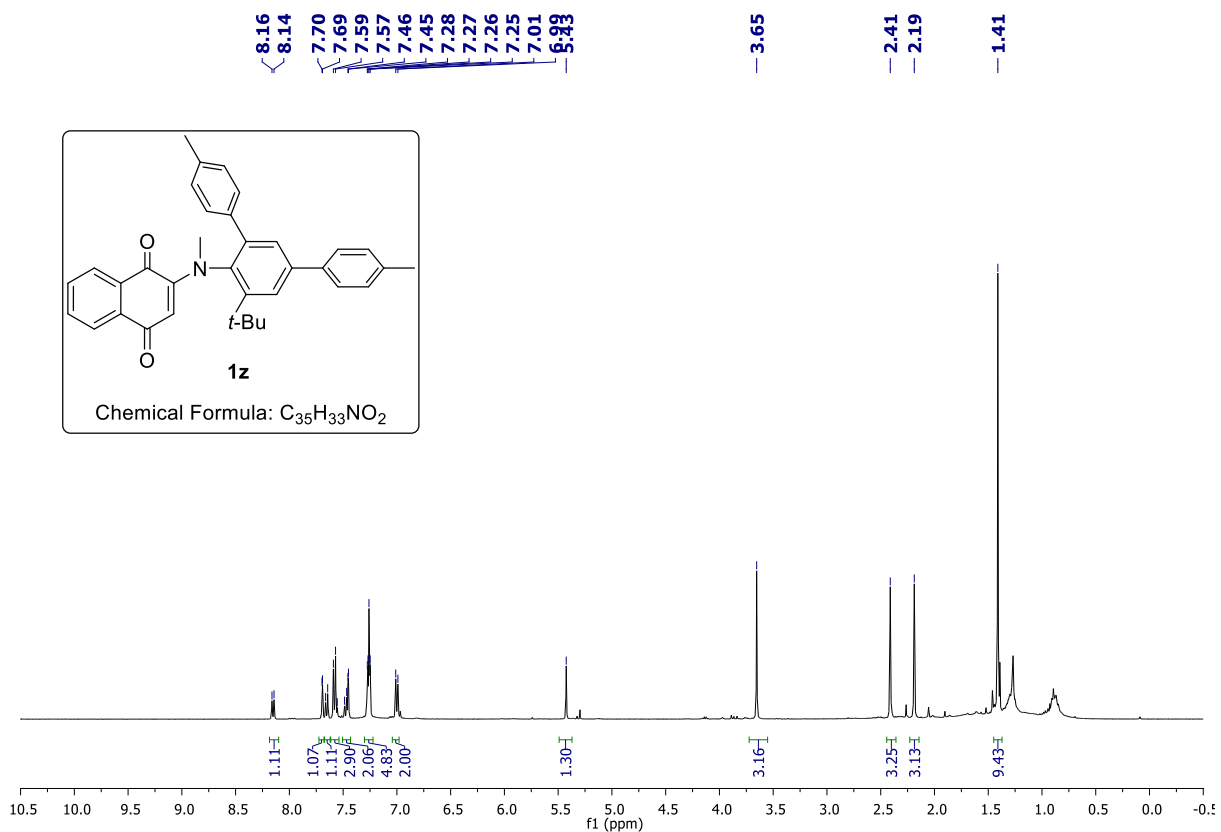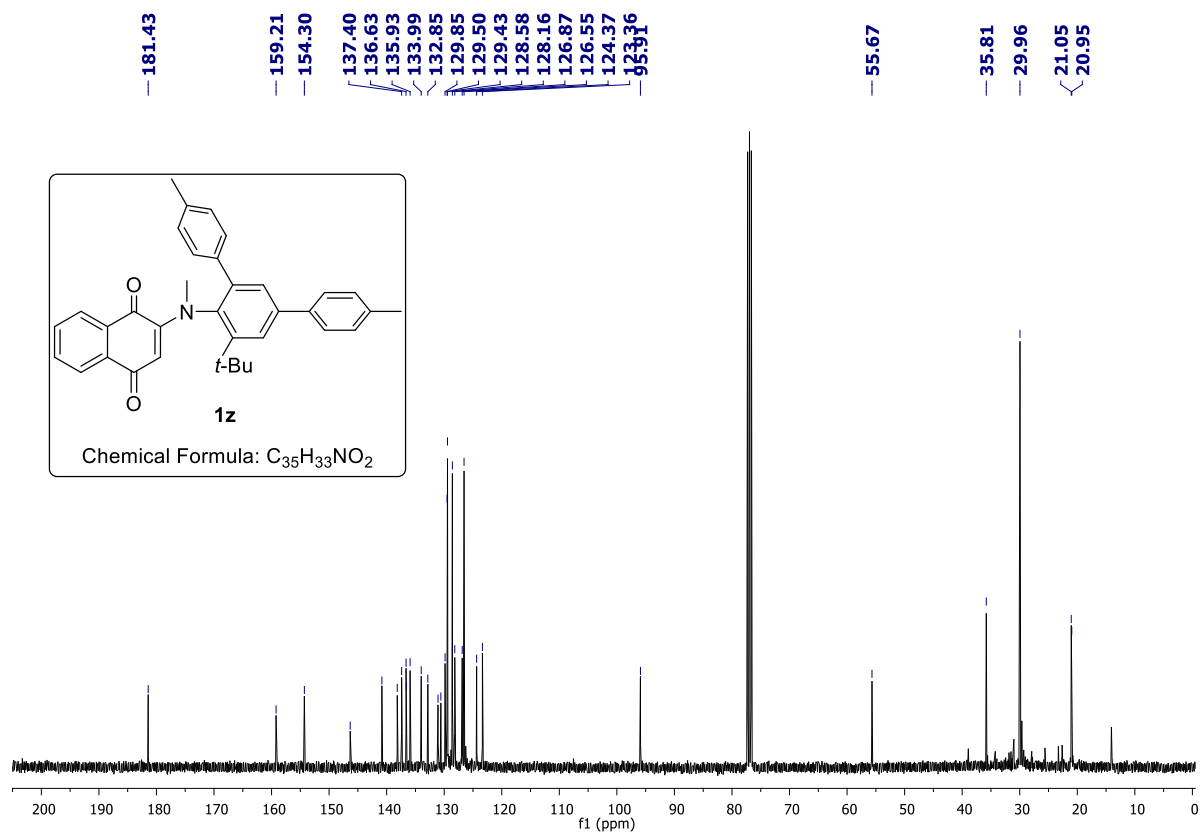

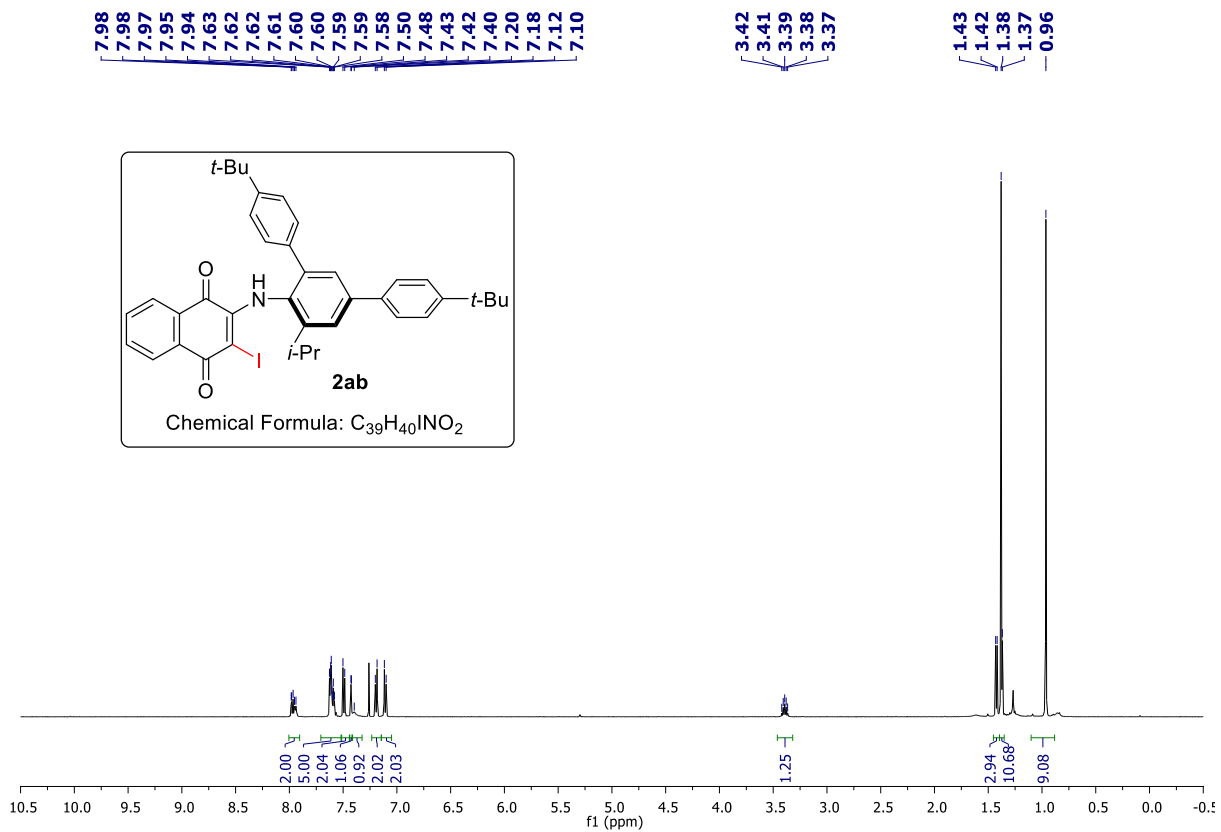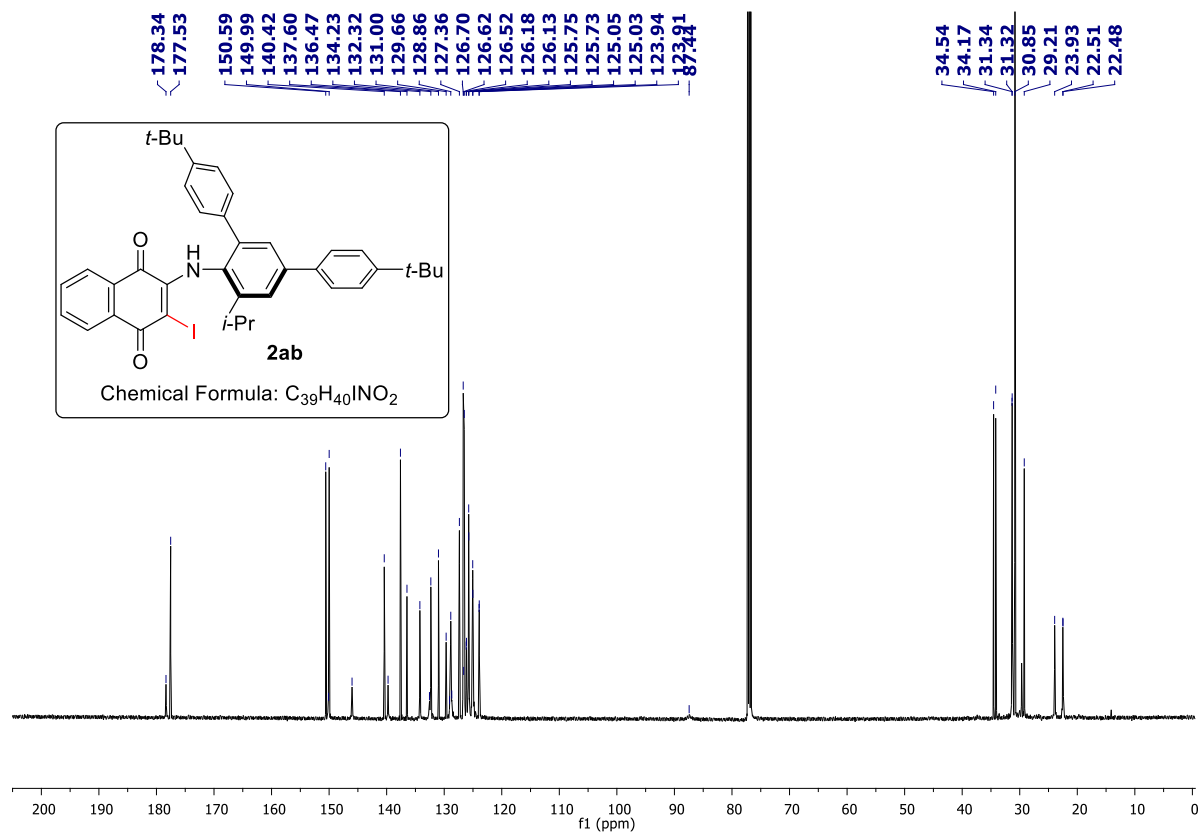

Supplement: NIHMS1585105-supplement-3.pdf [file NIHMS1585105-supplement-3.pdf]
